# Supplementary material
Source: ML conference proceedings conference paper supplement (https://proceedings.mlr.press/v92/raghu18a.html)
Supplement: Supplementary file [file raghu18a-supp.pdf]

# Evaluation of Causal Structure Learning Methods on Mixed Data Types

**Vineet K. Raghu**

VINEET@CS.PITT.EDU

*Department of Computer Science*

*University of Pittsburgh*

*Pittsburgh, PA 15213, USA*

**Allen Poon**

ALP170@PITT.EDU

*Department of Computer Science*

*University of Pittsburgh*

*Pittsburgh, PA 15213, USA*

**Panayiotis V. Benos**

BENOS@PITT.EDU

*Department of Computational and Systems Biology*

*University of Pittsburgh*

*Pittsburgh, PA 15213, USA*

**Editor:** Thuc Duy Le, Kun Zhang, Emre Kiciman, Aapo Hyvarinen, Lin Liu

## 1. Supplementary Material

Table 1: Comparison of Algorithms on all continuous datasets with 50 variables.

| Algorithm, | Sample Size, | Alpha/Penalty, | AP,   | AR,   | AHP,  | AHR,  | SHD     |
|------------|--------------|----------------|-------|-------|-------|-------|---------|
| CPC        | 100          | 1.00E-04       | 0.939 | 0.366 | 0.917 | 0.035 | 123.700 |
| CPC        | 100          | 0.001          | 0.931 | 0.411 | 0.926 | 0.059 | 119.450 |
| CPC        | 100          | 0.01           | 0.899 | 0.481 | 0.934 | 0.114 | 113.700 |
| CPC        | 100          | 0.03           | 0.881 | 0.525 | 0.900 | 0.136 | 111.800 |
| CPC        | 100          | 0.05           | 0.860 | 0.544 | 0.897 | 0.160 | 111.400 |
| CPC        | 100          | 0.08           | 0.833 | 0.567 | 0.865 | 0.180 | 112.350 |
| CPC        | 100          | 0.1            | 0.806 | 0.573 | 0.833 | 0.185 | 115.500 |
| PCMax      | 100          | 1.00E-04       | 0.923 | 0.375 | 0.714 | 0.073 | 122.350 |
| PCMax      | 100          | 0.001          | 0.906 | 0.425 | 0.728 | 0.124 | 117.500 |
| PCMax      | 100          | 0.01           | 0.870 | 0.493 | 0.657 | 0.210 | 113.450 |
| PCMax      | 100          | 0.03           | 0.849 | 0.538 | 0.607 | 0.262 | 112.600 |
| PCMax      | 100          | 0.05           | 0.821 | 0.556 | 0.577 | 0.290 | 113.800 |
| PCMax      | 100          | 0.08           | 0.793 | 0.581 | 0.570 | 0.341 | 114.100 |
| PCMax      | 100          | 0.1            | 0.767 | 0.588 | 0.548 | 0.343 | 117.700 |
| PCStable   | 100          | 1.00E-04       | 0.939 | 0.366 | 0.536 | 0.136 | 123.600 |
| PCStable   | 100          | 0.001          | 0.931 | 0.411 | 0.544 | 0.195 | 119.500 |
| PCStable   | 100          | 0.01           | 0.899 | 0.481 | 0.546 | 0.278 | 114.000 |
| PCStable   | 100          | 0.03           | 0.881 | 0.525 | 0.534 | 0.321 | 112.200 |

|          |      |          |       |       |       |       |         |
|----------|------|----------|-------|-------|-------|-------|---------|
| PCStable | 100  | 0.05     | 0.860 | 0.544 | 0.524 | 0.353 | 112.250 |
| PCStable | 100  | 0.08     | 0.833 | 0.567 | 0.501 | 0.387 | 113.850 |
| PCStable | 100  | 0.1      | 0.806 | 0.573 | 0.482 | 0.406 | 116.500 |
| FGES     | 100  | 0.5      | 0.731 | 0.714 | 0.590 | 0.519 | 106.150 |
| FGES     | 100  | 1        | 0.801 | 0.666 | 0.654 | 0.463 | 97.500  |
| FGES     | 100  | 2        | 0.850 | 0.562 | 0.672 | 0.337 | 103.650 |
| FGES     | 100  | 4        | 0.876 | 0.427 | 0.647 | 0.146 | 120.550 |
| FGES     | 100  | 8        | 0.906 | 0.281 | 0.732 | 0.050 | 130.750 |
| FGES     | 100  | 10       | 0.912 | 0.220 | 0.813 | 0.017 | 135.750 |
| FGES     | 100  | 20       | 0.957 | 0.050 | NaN   | 0.000 | 146.750 |
| CPC      | 1000 | 1.00E-04 | 0.951 | 0.711 | 0.912 | 0.368 | 75.800  |
| CPC      | 1000 | 0.001    | 0.947 | 0.724 | 0.903 | 0.399 | 73.350  |
| CPC      | 1000 | 0.01     | 0.937 | 0.747 | 0.885 | 0.441 | 70.400  |
| CPC      | 1000 | 0.03     | 0.933 | 0.761 | 0.883 | 0.465 | 68.400  |
| CPC      | 1000 | 0.05     | 0.925 | 0.771 | 0.880 | 0.483 | 67.250  |
| CPC      | 1000 | 0.08     | 0.906 | 0.781 | 0.876 | 0.497 | 68.600  |
| CPC      | 1000 | 0.1      | 0.885 | 0.785 | 0.860 | 0.501 | 71.400  |
| PCMax    | 1000 | 1.00E-04 | 0.931 | 0.721 | 0.808 | 0.501 | 71.350  |
| PCMax    | 1000 | 0.001    | 0.925 | 0.733 | 0.793 | 0.525 | 70.450  |
| PCMax    | 1000 | 0.01     | 0.907 | 0.757 | 0.774 | 0.547 | 70.100  |
| PCMax    | 1000 | 0.03     | 0.901 | 0.773 | 0.777 | 0.569 | 68.450  |
| PCMax    | 1000 | 0.05     | 0.888 | 0.781 | 0.790 | 0.590 | 66.950  |
| PCMax    | 1000 | 0.08     | 0.866 | 0.793 | 0.745 | 0.599 | 71.100  |
| PCMax    | 1000 | 0.1      | 0.854 | 0.796 | 0.733 | 0.594 | 73.100  |
| PCStable | 1000 | 1.00E-04 | 0.951 | 0.711 | 0.632 | 0.553 | 80.700  |
| PCStable | 1000 | 0.001    | 0.947 | 0.724 | 0.636 | 0.558 | 79.050  |
| PCStable | 1000 | 0.01     | 0.937 | 0.747 | 0.647 | 0.594 | 75.300  |
| PCStable | 1000 | 0.03     | 0.933 | 0.761 | 0.650 | 0.619 | 73.400  |
| PCStable | 1000 | 0.05     | 0.925 | 0.771 | 0.644 | 0.643 | 72.700  |
| PCStable | 1000 | 0.08     | 0.906 | 0.781 | 0.620 | 0.664 | 74.900  |
| PCStable | 1000 | 0.1      | 0.885 | 0.785 | 0.598 | 0.670 | 77.950  |
| FGES     | 1000 | 0.5      | 0.744 | 0.885 | 0.645 | 0.687 | 85.500  |
| FGES     | 1000 | 1        | 0.764 | 0.876 | 0.668 | 0.677 | 80.800  |
| FGES     | 1000 | 2        | 0.784 | 0.857 | 0.686 | 0.657 | 78.050  |
| FGES     | 1000 | 4        | 0.813 | 0.813 | 0.714 | 0.620 | 76.000  |
| FGES     | 1000 | 8        | 0.863 | 0.730 | 0.756 | 0.525 | 77.850  |
| FGES     | 1000 | 10       | 0.876 | 0.682 | 0.745 | 0.459 | 83.950  |
| FGES     | 1000 | 20       | 0.928 | 0.533 | 0.771 | 0.237 | 101.700 |
| CPC      | 3000 | 1.00E-04 | 0.972 | 0.799 | 0.967 | 0.516 | 55.300  |
| CPC      | 3000 | 0.001    | 0.972 | 0.807 | 0.965 | 0.534 | 53.550  |
| CPC      | 3000 | 0.01     | 0.964 | 0.828 | 0.944 | 0.571 | 50.650  |
| CPC      | 3000 | 0.03     | 0.947 | 0.839 | 0.934 | 0.585 | 51.200  |
| CPC      | 3000 | 0.05     | 0.936 | 0.840 | 0.926 | 0.587 | 52.550  |
| CPC      | 3000 | 0.08     | 0.924 | 0.844 | 0.928 | 0.592 | 53.700  |
| CPC      | 3000 | 0.1      | 0.914 | 0.845 | 0.927 | 0.595 | 55.050  |

EVALUATION OF CAUSAL STRUCTURE LEARNING

|          |      |          |       |       |       |       |        |
|----------|------|----------|-------|-------|-------|-------|--------|
| PCMax    | 3000 | 1.00E-04 | 0.945 | 0.807 | 0.869 | 0.607 | 54.250 |
| PCMax    | 3000 | 0.001    | 0.947 | 0.815 | 0.875 | 0.615 | 52.750 |
| PCMax    | 3000 | 0.01     | 0.944 | 0.838 | 0.862 | 0.636 | 51.100 |
| PCMax    | 3000 | 0.03     | 0.924 | 0.848 | 0.843 | 0.650 | 52.650 |
| PCMax    | 3000 | 0.05     | 0.910 | 0.848 | 0.825 | 0.654 | 55.100 |
| PCMax    | 3000 | 0.08     | 0.893 | 0.852 | 0.815 | 0.660 | 56.850 |
| PCMax    | 3000 | 0.1      | 0.875 | 0.855 | 0.799 | 0.672 | 58.550 |
| PCStable | 3000 | 1.00E-04 | 0.972 | 0.799 | 0.671 | 0.615 | 67.800 |
| PCStable | 3000 | 0.001    | 0.972 | 0.807 | 0.680 | 0.630 | 65.750 |
| PCStable | 3000 | 0.01     | 0.964 | 0.828 | 0.668 | 0.657 | 64.350 |
| PCStable | 3000 | 0.03     | 0.947 | 0.839 | 0.654 | 0.669 | 65.650 |
| PCStable | 3000 | 0.05     | 0.936 | 0.840 | 0.649 | 0.675 | 66.200 |
| PCStable | 3000 | 0.08     | 0.924 | 0.844 | 0.640 | 0.686 | 67.300 |
| PCStable | 3000 | 0.1      | 0.914 | 0.845 | 0.621 | 0.690 | 69.750 |
| FGES     | 3000 | 0.5      | 0.815 | 0.974 | 0.740 | 0.777 | 59.500 |
| FGES     | 3000 | 1        | 0.844 | 0.971 | 0.769 | 0.774 | 52.500 |
| FGES     | 3000 | 2        | 0.864 | 0.965 | 0.788 | 0.763 | 49.650 |
| FGES     | 3000 | 4        | 0.880 | 0.948 | 0.806 | 0.749 | 47.600 |
| FGES     | 3000 | 8        | 0.919 | 0.920 | 0.858 | 0.730 | 41.800 |
| FGES     | 3000 | 10       | 0.922 | 0.898 | 0.859 | 0.705 | 44.500 |
| FGES     | 3000 | 20       | 0.940 | 0.775 | 0.875 | 0.575 | 58.600 |
| CPC      | 5000 | 1.00E-04 | 0.997 | 0.965 | 0.997 | 0.732 | 15.450 |
| CPC      | 5000 | 0.001    | 0.996 | 0.968 | 0.997 | 0.737 | 15.150 |
| CPC      | 5000 | 0.01     | 0.985 | 0.971 | 0.997 | 0.742 | 15.850 |
| CPC      | 5000 | 0.03     | 0.952 | 0.973 | 0.997 | 0.743 | 19.200 |
| CPC      | 5000 | 0.05     | 0.905 | 0.976 | 0.995 | 0.747 | 24.400 |
| CPC      | 5000 | 0.08     | 0.834 | 0.977 | 0.990 | 0.748 | 33.600 |
| CPC      | 5000 | 0.1      | 0.789 | 0.978 | 0.981 | 0.749 | 40.650 |
| PCMax    | 5000 | 1.00E-04 | 0.995 | 0.965 | 0.974 | 0.763 | 14.850 |
| PCMax    | 5000 | 0.001    | 0.994 | 0.969 | 0.972 | 0.765 | 14.750 |
| PCMax    | 5000 | 0.01     | 0.983 | 0.972 | 0.965 | 0.769 | 15.550 |
| PCMax    | 5000 | 0.03     | 0.946 | 0.973 | 0.929 | 0.761 | 20.250 |
| PCMax    | 5000 | 0.05     | 0.894 | 0.976 | 0.864 | 0.763 | 27.100 |
| PCMax    | 5000 | 0.08     | 0.828 | 0.977 | 0.791 | 0.758 | 36.650 |
| PCMax    | 5000 | 0.1      | 0.778 | 0.978 | 0.727 | 0.767 | 44.600 |
| PCStable | 5000 | 1.00E-04 | 0.997 | 0.965 | 0.899 | 0.780 | 17.350 |
| PCStable | 5000 | 0.001    | 0.996 | 0.968 | 0.912 | 0.785 | 16.450 |
| PCStable | 5000 | 0.01     | 0.985 | 0.971 | 0.902 | 0.788 | 17.400 |
| PCStable | 5000 | 0.03     | 0.952 | 0.973 | 0.831 | 0.795 | 22.200 |
| PCStable | 5000 | 0.05     | 0.905 | 0.976 | 0.718 | 0.806 | 30.350 |
| PCStable | 5000 | 0.08     | 0.834 | 0.977 | 0.594 | 0.822 | 42.600 |
| PCStable | 5000 | 0.1      | 0.789 | 0.978 | 0.527 | 0.838 | 51.850 |
| FGES     | 5000 | 0.5      | 0.963 | 0.999 | 0.953 | 0.811 | 14.100 |
| FGES     | 5000 | 1        | 0.973 | 0.998 | 0.953 | 0.803 | 13.700 |
| FGES     | 5000 | 2        | 0.975 | 0.997 | 0.954 | 0.802 | 13.600 |

|          |       |          |       |       |       |       |        |
|----------|-------|----------|-------|-------|-------|-------|--------|
| FGES     | 5000  | 4        | 0.973 | 0.993 | 0.950 | 0.797 | 14.200 |
| FGES     | 5000  | 8        | 0.971 | 0.983 | 0.946 | 0.784 | 15.650 |
| FGES     | 5000  | 10       | 0.964 | 0.976 | 0.935 | 0.775 | 17.250 |
| FGES     | 5000  | 20       | 0.967 | 0.941 | 0.927 | 0.729 | 21.200 |
| CPC      | 10000 | 1.00E-04 | 0.960 | 0.809 | 0.913 | 0.589 | 52.100 |
| CPC      | 10000 | 0.001    | 0.955 | 0.815 | 0.916 | 0.604 | 50.950 |
| CPC      | 10000 | 0.01     | 0.941 | 0.825 | 0.907 | 0.618 | 51.250 |
| CPC      | 10000 | 0.03     | 0.932 | 0.827 | 0.893 | 0.622 | 52.600 |
| CPC      | 10000 | 0.05     | 0.912 | 0.833 | 0.879 | 0.631 | 54.950 |
| CPC      | 10000 | 0.08     | 0.892 | 0.835 | 0.882 | 0.637 | 57.350 |
| CPC      | 10000 | 0.1      | 0.876 | 0.836 | 0.881 | 0.640 | 59.550 |
| PCMax    | 10000 | 1.00E-04 | 0.927 | 0.832 | 0.790 | 0.647 | 57.100 |
| PCMax    | 10000 | 0.001    | 0.920 | 0.838 | 0.787 | 0.653 | 57.150 |
| PCMax    | 10000 | 0.01     | 0.903 | 0.845 | 0.760 | 0.660 | 59.950 |
| PCMax    | 10000 | 0.03     | 0.895 | 0.848 | 0.742 | 0.657 | 62.250 |
| PCMax    | 10000 | 0.05     | 0.868 | 0.852 | 0.716 | 0.654 | 67.300 |
| PCMax    | 10000 | 0.08     | 0.844 | 0.856 | 0.700 | 0.657 | 70.900 |
| PCMax    | 10000 | 0.1      | 0.825 | 0.855 | 0.681 | 0.657 | 74.700 |
| PCStable | 10000 | 1.00E-04 | 0.960 | 0.809 | 0.638 | 0.701 | 67.350 |
| PCStable | 10000 | 0.001    | 0.955 | 0.815 | 0.633 | 0.703 | 67.700 |
| PCStable | 10000 | 0.01     | 0.941 | 0.825 | 0.623 | 0.715 | 68.500 |
| PCStable | 10000 | 0.03     | 0.932 | 0.827 | 0.621 | 0.722 | 68.900 |
| PCStable | 10000 | 0.05     | 0.912 | 0.833 | 0.604 | 0.729 | 71.850 |
| PCStable | 10000 | 0.08     | 0.892 | 0.835 | 0.585 | 0.736 | 75.300 |
| PCStable | 10000 | 0.1      | 0.876 | 0.836 | 0.569 | 0.737 | 78.000 |
| FGES     | 10000 | 0.5      | 0.730 | 0.983 | 0.638 | 0.801 | 82.100 |
| FGES     | 10000 | 1        | 0.740 | 0.979 | 0.645 | 0.795 | 79.550 |
| FGES     | 10000 | 2        | 0.751 | 0.973 | 0.652 | 0.787 | 76.300 |
| FGES     | 10000 | 4        | 0.766 | 0.966 | 0.665 | 0.781 | 72.950 |
| FGES     | 10000 | 8        | 0.797 | 0.953 | 0.698 | 0.775 | 65.500 |
| FGES     | 10000 | 10       | 0.816 | 0.949 | 0.718 | 0.773 | 61.750 |
| FGES     | 10000 | 20       | 0.820 | 0.922 | 0.709 | 0.738 | 65.350 |

STARS Averages

|       | Sample Size | AP,   | AR,   | AHP,  | AHR,  |
|-------|-------------|-------|-------|-------|-------|
| CPC   | 100         | 0.806 | 0.573 | 0.833 | 0.185 |
| CPC   | 1000        | 0.943 | 0.724 | 0.894 | 0.390 |
| CPC   | 3000        | 0.961 | 0.813 | 0.957 | 0.543 |
| CPC   | 5000        | 0.961 | 0.972 | 0.997 | 0.741 |
| CPC   | 10000       | 0.938 | 0.825 | 0.904 | 0.617 |
| PCMax | 100         | 0.767 | 0.588 | 0.547 | 0.339 |
| PCMax | 1000        | 0.928 | 0.726 | 0.803 | 0.510 |
| PCMax | 3000        | 0.946 | 0.818 | 0.868 | 0.618 |
| PCMax | 5000        | 0.960 | 0.973 | 0.948 | 0.764 |

EVALUATION OF CAUSAL STRUCTURE LEARNING

|          |       |       |       |       |       |
|----------|-------|-------|-------|-------|-------|
| PCMax    | 10000 | 0.917 | 0.841 | 0.779 | 0.661 |
| PCStable | 100   | 0.806 | 0.573 | 0.482 | 0.406 |
| PCStable | 1000  | 0.946 | 0.723 | 0.635 | 0.560 |
| PCStable | 3000  | 0.966 | 0.814 | 0.668 | 0.640 |
| PCStable | 5000  | 0.957 | 0.973 | 0.843 | 0.793 |
| PCStable | 10000 | 0.943 | 0.822 | 0.627 | 0.714 |
| FGES     | 100   | 0.957 | 0.050 | NaN   | 0.000 |
| FGES     | 1000  | 0.928 | 0.533 | 0.771 | 0.237 |
| FGES     | 3000  | 0.940 | 0.775 | 0.875 | 0.575 |
| FGES     | 5000  | 0.967 | 0.941 | 0.927 | 0.729 |
| FGES     | 10000 | 0.819 | 0.923 | 0.708 | 0.739 |

Table 2: Comparison of Algorithms on all continuous datasets with 100 variables.

| Algorithm, | Sample Size, | Alpha/Penalty, | AP,   | AR,   | AHP,  | AHR,  | SHD     |
|------------|--------------|----------------|-------|-------|-------|-------|---------|
| CPC        | 100          | 1.00E-04       | 0.986 | 0.389 | 0.969 | 0.052 | 235.900 |
| CPC        | 100          | 0.001          | 0.978 | 0.456 | 0.979 | 0.096 | 220.500 |
| CPC        | 100          | 0.01           | 0.965 | 0.542 | 0.959 | 0.188 | 197.250 |
| CPC        | 100          | 0.03           | 0.929 | 0.595 | 0.954 | 0.255 | 187.500 |
| CPC        | 100          | 0.05           | 0.890 | 0.621 | 0.953 | 0.288 | 188.150 |
| CPC        | 100          | 0.08           | 0.842 | 0.644 | 0.940 | 0.315 | 194.000 |
| CPC        | 100          | 0.1            | 0.819 | 0.660 | 0.917 | 0.340 | 196.850 |
| PCMax      | 100          | 1.00E-04       | 0.971 | 0.397 | 0.882 | 0.121 | 227.750 |
| PCMax      | 100          | 0.001          | 0.971 | 0.464 | 0.857 | 0.187 | 210.300 |
| PCMax      | 100          | 0.01           | 0.948 | 0.548 | 0.833 | 0.301 | 188.050 |
| PCMax      | 100          | 0.03           | 0.909 | 0.601 | 0.763 | 0.353 | 185.250 |
| PCMax      | 100          | 0.05           | 0.866 | 0.627 | 0.708 | 0.389 | 190.100 |
| PCMax      | 100          | 0.08           | 0.812 | 0.651 | 0.651 | 0.423 | 200.200 |
| PCMax      | 100          | 0.1            | 0.786 | 0.667 | 0.617 | 0.444 | 206.150 |
| PCStable   | 100          | 1.00E-04       | 0.986 | 0.389 | 0.555 | 0.164 | 237.800 |
| PCStable   | 100          | 0.001          | 0.978 | 0.456 | 0.576 | 0.240 | 224.000 |
| PCStable   | 100          | 0.01           | 0.965 | 0.542 | 0.587 | 0.357 | 205.750 |
| PCStable   | 100          | 0.03           | 0.929 | 0.595 | 0.549 | 0.428 | 203.200 |
| PCStable   | 100          | 0.05           | 0.890 | 0.621 | 0.527 | 0.469 | 206.550 |
| PCStable   | 100          | 0.08           | 0.842 | 0.644 | 0.476 | 0.504 | 217.550 |
| PCStable   | 100          | 0.1            | 0.819 | 0.660 | 0.458 | 0.532 | 221.800 |
| FGES       | 100          | 0.5            | 0.763 | 0.764 | 0.681 | 0.633 | 173.900 |
| FGES       | 100          | 1              | 0.886 | 0.694 | 0.805 | 0.527 | 150.800 |
| FGES       | 100          | 2              | 0.942 | 0.578 | 0.851 | 0.374 | 173.550 |
| FGES       | 100          | 4              | 0.951 | 0.399 | 0.816 | 0.124 | 230.950 |
| FGES       | 100          | 8              | 0.968 | 0.210 | 0.835 | 0.011 | 269.250 |
| FGES       | 100          | 10             | 0.982 | 0.154 | 0.775 | 0.006 | 277.000 |
| FGES       | 100          | 20             | 1.000 | 0.029 | NaN   | 0.000 | 295.600 |
| CPC        | 1000         | 1.00E-04       | 0.954 | 0.698 | 0.955 | 0.390 | 147.650 |

|          |      |          |       |       |       |       |         |
|----------|------|----------|-------|-------|-------|-------|---------|
| CPC      | 1000 | 0.001    | 0.952 | 0.726 | 0.952 | 0.435 | 137.750 |
| CPC      | 1000 | 0.01     | 0.937 | 0.756 | 0.940 | 0.493 | 129.200 |
| CPC      | 1000 | 0.03     | 0.910 | 0.770 | 0.935 | 0.520 | 130.500 |
| CPC      | 1000 | 0.05     | 0.887 | 0.782 | 0.929 | 0.540 | 133.100 |
| CPC      | 1000 | 0.08     | 0.843 | 0.787 | 0.915 | 0.547 | 145.550 |
| CPC      | 1000 | 0.1      | 0.823 | 0.793 | 0.912 | 0.555 | 151.100 |
| PCMax    | 1000 | 1.00E-04 | 0.931 | 0.705 | 0.853 | 0.512 | 139.300 |
| PCMax    | 1000 | 0.001    | 0.927 | 0.735 | 0.840 | 0.546 | 132.750 |
| PCMax    | 1000 | 0.01     | 0.911 | 0.769 | 0.833 | 0.583 | 127.750 |
| PCMax    | 1000 | 0.03     | 0.880 | 0.783 | 0.796 | 0.595 | 134.800 |
| PCMax    | 1000 | 0.05     | 0.856 | 0.792 | 0.776 | 0.608 | 139.750 |
| PCMax    | 1000 | 0.08     | 0.814 | 0.798 | 0.722 | 0.620 | 153.600 |
| PCMax    | 1000 | 0.1      | 0.792 | 0.803 | 0.690 | 0.621 | 163.600 |
| PCStable | 1000 | 1.00E-04 | 0.954 | 0.698 | 0.633 | 0.524 | 165.050 |
| PCStable | 1000 | 0.001    | 0.952 | 0.726 | 0.629 | 0.559 | 159.400 |
| PCStable | 1000 | 0.01     | 0.937 | 0.756 | 0.622 | 0.601 | 155.000 |
| PCStable | 1000 | 0.03     | 0.910 | 0.770 | 0.590 | 0.624 | 160.950 |
| PCStable | 1000 | 0.05     | 0.887 | 0.782 | 0.558 | 0.642 | 167.600 |
| PCStable | 1000 | 0.08     | 0.843 | 0.787 | 0.508 | 0.653 | 183.950 |
| PCStable | 1000 | 0.1      | 0.823 | 0.793 | 0.487 | 0.664 | 191.600 |
| FGES     | 1000 | 0.5      | 0.798 | 0.923 | 0.742 | 0.777 | 123.600 |
| FGES     | 1000 | 1        | 0.832 | 0.903 | 0.766 | 0.747 | 115.350 |
| FGES     | 1000 | 2        | 0.849 | 0.875 | 0.780 | 0.714 | 116.100 |
| FGES     | 1000 | 4        | 0.877 | 0.807 | 0.812 | 0.647 | 122.150 |
| FGES     | 1000 | 8        | 0.898 | 0.695 | 0.819 | 0.523 | 147.150 |
| FGES     | 1000 | 10       | 0.909 | 0.656 | 0.821 | 0.476 | 156.150 |
| FGES     | 1000 | 20       | 0.930 | 0.505 | 0.817 | 0.263 | 200.550 |
| CPC      | 3000 | 1.00E-04 | 0.960 | 0.803 | 0.935 | 0.539 | 110.900 |
| CPC      | 3000 | 0.001    | 0.962 | 0.818 | 0.936 | 0.569 | 103.750 |
| CPC      | 3000 | 0.01     | 0.957 | 0.835 | 0.929 | 0.596 | 98.850  |
| CPC      | 3000 | 0.03     | 0.933 | 0.839 | 0.918 | 0.601 | 104.450 |
| CPC      | 3000 | 0.05     | 0.909 | 0.841 | 0.906 | 0.607 | 110.800 |
| CPC      | 3000 | 0.08     | 0.878 | 0.844 | 0.897 | 0.609 | 120.650 |
| CPC      | 3000 | 0.1      | 0.853 | 0.847 | 0.889 | 0.614 | 128.250 |
| PCMax    | 3000 | 1.00E-04 | 0.940 | 0.816 | 0.828 | 0.605 | 114.000 |
| PCMax    | 3000 | 0.001    | 0.939 | 0.830 | 0.820 | 0.624 | 110.750 |
| PCMax    | 3000 | 0.01     | 0.933 | 0.843 | 0.826 | 0.644 | 107.250 |
| PCMax    | 3000 | 0.03     | 0.905 | 0.849 | 0.795 | 0.651 | 115.000 |
| PCMax    | 3000 | 0.05     | 0.885 | 0.852 | 0.785 | 0.663 | 119.200 |
| PCMax    | 3000 | 0.08     | 0.849 | 0.857 | 0.746 | 0.667 | 131.750 |
| PCMax    | 3000 | 0.1      | 0.819 | 0.859 | 0.705 | 0.663 | 144.950 |
| PCStable | 3000 | 1.00E-04 | 0.960 | 0.803 | 0.676 | 0.645 | 130.800 |
| PCStable | 3000 | 0.001    | 0.962 | 0.818 | 0.684 | 0.664 | 125.450 |
| PCStable | 3000 | 0.01     | 0.957 | 0.835 | 0.677 | 0.685 | 123.200 |

EVALUATION OF CAUSAL STRUCTURE LEARNING

|          |       |          |       |       |       |       |         |
|----------|-------|----------|-------|-------|-------|-------|---------|
| PCStable | 3000  | 0.03     | 0.933 | 0.839 | 0.651 | 0.693 | 129.350 |
| PCStable | 3000  | 0.05     | 0.909 | 0.841 | 0.619 | 0.700 | 137.950 |
| PCStable | 3000  | 0.08     | 0.878 | 0.844 | 0.574 | 0.703 | 151.500 |
| PCStable | 3000  | 0.1      | 0.853 | 0.847 | 0.543 | 0.711 | 161.550 |
| FGES     | 3000  | 0.5      | 0.839 | 0.984 | 0.766 | 0.803 | 100.800 |
| FGES     | 3000  | 1        | 0.875 | 0.982 | 0.802 | 0.799 | 85.750  |
| FGES     | 3000  | 2        | 0.883 | 0.977 | 0.809 | 0.794 | 83.650  |
| FGES     | 3000  | 4        | 0.898 | 0.970 | 0.831 | 0.789 | 78.550  |
| FGES     | 3000  | 8        | 0.916 | 0.946 | 0.850 | 0.762 | 78.200  |
| FGES     | 3000  | 10       | 0.922 | 0.926 | 0.854 | 0.742 | 81.500  |
| FGES     | 3000  | 20       | 0.931 | 0.813 | 0.865 | 0.621 | 109.100 |
| CPC      | 5000  | 1.00E-04 | 0.998 | 0.975 | 0.991 | 0.607 | 42.450  |
| CPC      | 5000  | 0.001    | 0.996 | 0.978 | 0.991 | 0.612 | 42.000  |
| CPC      | 5000  | 0.01     | 0.975 | 0.982 | 0.993 | 0.619 | 45.050  |
| CPC      | 5000  | 0.03     | 0.925 | 0.986 | 0.993 | 0.624 | 55.400  |
| CPC      | 5000  | 0.05     | 0.859 | 0.988 | 0.986 | 0.625 | 71.850  |
| CPC      | 5000  | 0.08     | 0.776 | 0.989 | 0.969 | 0.630 | 96.100  |
| CPC      | 5000  | 0.1      | 0.725 | 0.990 | 0.955 | 0.632 | 114.300 |
| PCMax    | 5000  | 1.00E-04 | 0.997 | 0.979 | 0.979 | 0.662 | 37.750  |
| PCMax    | 5000  | 0.001    | 0.995 | 0.980 | 0.977 | 0.668 | 37.400  |
| PCMax    | 5000  | 0.01     | 0.971 | 0.985 | 0.957 | 0.680 | 41.150  |
| PCMax    | 5000  | 0.03     | 0.919 | 0.987 | 0.894 | 0.684 | 53.450  |
| PCMax    | 5000  | 0.05     | 0.847 | 0.988 | 0.786 | 0.689 | 73.750  |
| PCMax    | 5000  | 0.08     | 0.760 | 0.989 | 0.673 | 0.709 | 101.350 |
| PCMax    | 5000  | 0.1      | 0.704 | 0.989 | 0.605 | 0.722 | 122.450 |
| PCStable | 5000  | 1.00E-04 | 0.998 | 0.975 | 0.873 | 0.684 | 44.150  |
| PCStable | 5000  | 0.001    | 0.996 | 0.978 | 0.886 | 0.691 | 42.350  |
| PCStable | 5000  | 0.01     | 0.975 | 0.982 | 0.858 | 0.704 | 45.500  |
| PCStable | 5000  | 0.03     | 0.925 | 0.986 | 0.747 | 0.726 | 58.450  |
| PCStable | 5000  | 0.05     | 0.859 | 0.988 | 0.614 | 0.747 | 80.300  |
| PCStable | 5000  | 0.08     | 0.776 | 0.989 | 0.487 | 0.779 | 111.700 |
| PCStable | 5000  | 0.1      | 0.725 | 0.990 | 0.424 | 0.796 | 134.900 |
| FGES     | 5000  | 0.5      | 0.954 | 1.000 | 0.937 | 0.722 | 39.500  |
| FGES     | 5000  | 1        | 0.992 | 1.000 | 0.987 | 0.707 | 31.550  |
| FGES     | 5000  | 2        | 0.993 | 1.000 | 0.987 | 0.707 | 31.350  |
| FGES     | 5000  | 4        | 0.989 | 0.999 | 0.980 | 0.703 | 32.800  |
| FGES     | 5000  | 8        | 0.983 | 0.988 | 0.963 | 0.687 | 37.150  |
| FGES     | 5000  | 10       | 0.981 | 0.983 | 0.959 | 0.683 | 38.550  |
| FGES     | 5000  | 20       | 0.980 | 0.937 | 0.952 | 0.634 | 48.250  |
| CPC      | 10000 | 1.00E-04 | 0.981 | 0.916 | 0.966 | 0.718 | 61.500  |
| CPC      | 10000 | 0.001    | 0.980 | 0.919 | 0.963 | 0.724 | 60.750  |
| CPC      | 10000 | 0.01     | 0.973 | 0.925 | 0.963 | 0.732 | 60.650  |
| CPC      | 10000 | 0.03     | 0.953 | 0.929 | 0.960 | 0.736 | 65.350  |

|          |       |          |       |       |       |       |         |
|----------|-------|----------|-------|-------|-------|-------|---------|
| CPC      | 10000 | 0.05     | 0.933 | 0.931 | 0.955 | 0.737 | 71.350  |
| CPC      | 10000 | 0.08     | 0.907 | 0.933 | 0.954 | 0.740 | 79.200  |
| CPC      | 10000 | 0.1      | 0.882 | 0.934 | 0.947 | 0.742 | 88.100  |
| PCMax    | 10000 | 1.00E-04 | 0.964 | 0.920 | 0.893 | 0.725 | 71.700  |
| PCMax    | 10000 | 0.001    | 0.963 | 0.926 | 0.897 | 0.731 | 69.750  |
| PCMax    | 10000 | 0.01     | 0.955 | 0.933 | 0.895 | 0.737 | 69.950  |
| PCMax    | 10000 | 0.03     | 0.934 | 0.939 | 0.874 | 0.741 | 75.950  |
| PCMax    | 10000 | 0.05     | 0.912 | 0.940 | 0.853 | 0.747 | 82.700  |
| PCMax    | 10000 | 0.08     | 0.881 | 0.942 | 0.817 | 0.755 | 92.950  |
| PCMax    | 10000 | 0.1      | 0.854 | 0.942 | 0.786 | 0.760 | 102.900 |
| PCStable | 10000 | 1.00E-04 | 0.981 | 0.916 | 0.738 | 0.755 | 90.750  |
| PCStable | 10000 | 0.001    | 0.980 | 0.919 | 0.748 | 0.754 | 88.350  |
| PCStable | 10000 | 0.01     | 0.973 | 0.925 | 0.743 | 0.762 | 88.600  |
| PCStable | 10000 | 0.03     | 0.953 | 0.929 | 0.711 | 0.772 | 94.850  |
| PCStable | 10000 | 0.05     | 0.933 | 0.931 | 0.675 | 0.781 | 103.350 |
| PCStable | 10000 | 0.08     | 0.907 | 0.933 | 0.631 | 0.787 | 115.600 |
| PCStable | 10000 | 0.1      | 0.882 | 0.934 | 0.592 | 0.794 | 127.400 |
| FGES     | 10000 | 0.5      | 0.902 | 0.994 | 0.874 | 0.818 | 64.850  |
| FGES     | 10000 | 1        | 0.926 | 0.995 | 0.895 | 0.811 | 57.150  |
| FGES     | 10000 | 2        | 0.925 | 0.995 | 0.891 | 0.808 | 58.550  |
| FGES     | 10000 | 4        | 0.935 | 0.995 | 0.902 | 0.807 | 55.400  |
| FGES     | 10000 | 8        | 0.942 | 0.986 | 0.913 | 0.799 | 54.500  |
| FGES     | 10000 | 10       | 0.950 | 0.979 | 0.925 | 0.792 | 53.400  |
| FGES     | 10000 | 20       | 0.957 | 0.950 | 0.928 | 0.765 | 59.200  |

STARS Averages

|          | Sample Size | AP,   | AR,   | AHP,  | AHR,  |
|----------|-------------|-------|-------|-------|-------|
| CPC      | 100         | 0.819 | 0.660 | 0.917 | 0.340 |
| CPC      | 1000        | 0.921 | 0.766 | 0.938 | 0.512 |
| CPC      | 3000        | 0.920 | 0.840 | 0.912 | 0.605 |
| CPC      | 5000        | 0.925 | 0.986 | 0.993 | 0.624 |
| CPC      | 10000       | 0.933 | 0.932 | 0.957 | 0.737 |
| PCMax    | 100         | 0.786 | 0.667 | 0.617 | 0.444 |
| PCMax    | 1000        | 0.916 | 0.764 | 0.836 | 0.575 |
| PCMax    | 3000        | 0.913 | 0.845 | 0.804 | 0.650 |
| PCMax    | 5000        | 0.919 | 0.987 | 0.894 | 0.684 |
| PCMax    | 10000       | 0.919 | 0.939 | 0.860 | 0.742 |
| PCStable | 100         | 0.819 | 0.660 | 0.458 | 0.532 |
| PCStable | 1000        | 0.922 | 0.766 | 0.603 | 0.615 |
| PCStable | 3000        | 0.922 | 0.839 | 0.634 | 0.692 |
| PCStable | 5000        | 0.921 | 0.986 | 0.740 | 0.728 |
| PCStable | 10000       | 0.932 | 0.932 | 0.671 | 0.783 |
| FGES     | 100         | 1.000 | 0.029 | NaN   | 0.000 |
| FGES     | 1000        | 0.930 | 0.505 | 0.817 | 0.263 |
| FGES     | 3000        | 0.931 | 0.813 | 0.865 | 0.621 |



EVALUATION OF CAUSAL STRUCTURE LEARNING

|      |       |       |       |       |       |
|------|-------|-------|-------|-------|-------|
| FGES | 5000  | 0.980 | 0.937 | 0.952 | 0.634 |
| FGES | 10000 | 0.957 | 0.950 | 0.928 | 0.765 |

Table 3: All data for comparison of independence tests split by edge type with 50 and 100 variable, 1.5 density graphs generated using the Lee and Hastie method.

| Algorithm      | Num Vars | SS  | Type | Parameter | AP    | AR    | AHP   | AHR   | SHD    |
|----------------|----------|-----|------|-----------|-------|-------|-------|-------|--------|
| FisherZ        | 50       | 100 | CC   | 1.00E-04  | 0.992 | 0.663 | 0.778 | 0.056 | 22.350 |
| FisherZ        | 50       | 100 | CC   | 0.001     | 0.993 | 0.719 | 0.909 | 0.091 | 20.600 |
| FisherZ        | 50       | 100 | CC   | 0.01      | 0.936 | 0.792 | 0.961 | 0.176 | 18.700 |
| FisherZ        | 50       | 100 | CC   | 0.03      | 0.860 | 0.816 | 0.954 | 0.217 | 19.900 |
| FisherZ        | 50       | 100 | CC   | 0.05      | 0.806 | 0.835 | 0.939 | 0.257 | 20.650 |
| FisherZ        | 50       | 100 | CC   | 0.08      | 0.750 | 0.845 | 0.884 | 0.298 | 22.350 |
| FisherZ        | 50       | 300 | CC   | 1.00E-04  | 0.974 | 0.816 | 0.922 | 0.203 | 18.900 |
| FisherZ        | 50       | 300 | CC   | 0.001     | 0.951 | 0.833 | 0.937 | 0.239 | 18.400 |
| FisherZ        | 50       | 300 | CC   | 0.01      | 0.909 | 0.880 | 0.916 | 0.334 | 17.250 |
| FisherZ        | 50       | 300 | CC   | 0.03      | 0.857 | 0.893 | 0.862 | 0.364 | 17.900 |
| FisherZ        | 50       | 300 | CC   | 0.05      | 0.802 | 0.909 | 0.872 | 0.404 | 19.000 |
| FisherZ        | 50       | 300 | CC   | 0.08      | 0.755 | 0.919 | 0.791 | 0.438 | 20.650 |
| FisherZ        | 50       | 500 | CC   | 1.00E-04  | 0.929 | 0.886 | 0.967 | 0.315 | 16.450 |
| FisherZ        | 50       | 500 | CC   | 0.001     | 0.925 | 0.904 | 0.978 | 0.370 | 15.300 |
| FisherZ        | 50       | 500 | CC   | 0.01      | 0.876 | 0.933 | 0.965 | 0.508 | 14.450 |
| FisherZ        | 50       | 500 | CC   | 0.03      | 0.823 | 0.938 | 0.886 | 0.536 | 15.650 |
| FisherZ        | 50       | 500 | CC   | 0.05      | 0.785 | 0.938 | 0.841 | 0.542 | 17.550 |
| FisherZ        | 50       | 500 | CC   | 0.08      | 0.730 | 0.940 | 0.811 | 0.577 | 20.100 |
| ChiSquare      | 50       | 100 | CC   | 1.00E-04  | 0.963 | 0.256 | NaN   | 0.000 | 29.650 |
| ChiSquare      | 50       | 100 | CC   | 0.001     | 0.973 | 0.300 | NaN   | 0.000 | 29.100 |
| ChiSquare      | 50       | 100 | CC   | 0.01      | 0.961 | 0.428 | NaN   | 0.000 | 27.400 |
| ChiSquare      | 50       | 100 | CC   | 0.03      | 0.967 | 0.460 | NaN   | 0.000 | 27.050 |
| ChiSquare      | 50       | 100 | CC   | 0.05      | 0.968 | 0.466 | 0.667 | 0.005 | 26.900 |
| ChiSquare      | 50       | 100 | CC   | 0.08      | 0.944 | 0.503 | 0.833 | 0.010 | 26.450 |
| ChiSquare      | 50       | 300 | CC   | 1.00E-04  | 0.986 | 0.534 | NaN   | 0.000 | 27.400 |
| ChiSquare      | 50       | 300 | CC   | 0.001     | 0.984 | 0.582 | 0.500 | 0.002 | 26.550 |
| ChiSquare      | 50       | 300 | CC   | 0.01      | 0.972 | 0.620 | 0.500 | 0.008 | 25.950 |
| ChiSquare      | 50       | 300 | CC   | 0.03      | 0.931 | 0.653 | 0.650 | 0.019 | 26.100 |
| ChiSquare      | 50       | 300 | CC   | 0.05      | 0.941 | 0.661 | 0.550 | 0.016 | 25.800 |
| ChiSquare      | 50       | 300 | CC   | 0.08      | 0.920 | 0.678 | 0.775 | 0.044 | 25.700 |
| ChiSquare      | 50       | 500 | CC   | 1.00E-04  | 0.994 | 0.641 | 1.000 | 0.059 | 24.450 |
| ChiSquare      | 50       | 500 | CC   | 0.001     | 0.985 | 0.680 | 1.000 | 0.079 | 23.600 |
| ChiSquare      | 50       | 500 | CC   | 0.01      | 0.958 | 0.734 | 0.922 | 0.088 | 23.100 |
| ChiSquare      | 50       | 500 | CC   | 0.03      | 0.929 | 0.766 | 0.845 | 0.116 | 23.050 |
| ChiSquare      | 50       | 500 | CC   | 0.05      | 0.906 | 0.778 | 0.962 | 0.150 | 22.550 |
| ChiSquare      | 50       | 500 | CC   | 0.08      | 0.916 | 0.796 | 0.953 | 0.169 | 21.900 |
| MultinomialLRT | 50       | 100 | CC   | 1.00E-04  | 0.995 | 0.615 | 0.900 | 0.027 | 23.400 |
| MultinomialLRT | 50       | 100 | CC   | 0.001     | 0.996 | 0.697 | 0.955 | 0.091 | 20.900 |

|                |    |     |    |          |       |       |       |       |        |
|----------------|----|-----|----|----------|-------|-------|-------|-------|--------|
| MultinomialLRT | 50 | 100 | CC | 0.01     | 0.955 | 0.761 | 0.944 | 0.146 | 19.650 |
| MultinomialLRT | 50 | 100 | CC | 0.03     | 0.922 | 0.784 | 0.872 | 0.209 | 19.000 |
| MultinomialLRT | 50 | 100 | CC | 0.05     | 0.884 | 0.821 | 0.850 | 0.234 | 19.050 |
| MultinomialLRT | 50 | 100 | CC | 0.08     | 0.851 | 0.851 | 0.860 | 0.311 | 18.550 |
| MultinomialLRT | 50 | 300 | CC | 1.00E-04 | 0.990 | 0.780 | 0.903 | 0.208 | 19.450 |
| MultinomialLRT | 50 | 300 | CC | 0.001    | 0.985 | 0.811 | 0.884 | 0.280 | 18.000 |
| MultinomialLRT | 50 | 300 | CC | 0.01     | 0.985 | 0.853 | 0.950 | 0.362 | 15.450 |
| MultinomialLRT | 50 | 300 | CC | 0.03     | 0.921 | 0.870 | 0.944 | 0.408 | 15.600 |
| MultinomialLRT | 50 | 300 | CC | 0.05     | 0.896 | 0.889 | 0.940 | 0.445 | 15.150 |
| MultinomialLRT | 50 | 300 | CC | 0.08     | 0.837 | 0.904 | 0.922 | 0.479 | 16.650 |
| MultinomialLRT | 50 | 500 | CC | 1.00E-04 | 0.987 | 0.863 | 0.971 | 0.429 | 14.350 |
| MultinomialLRT | 50 | 500 | CC | 0.001    | 0.988 | 0.899 | 0.971 | 0.521 | 11.900 |
| MultinomialLRT | 50 | 500 | CC | 0.01     | 0.971 | 0.919 | 0.987 | 0.578 | 10.450 |
| MultinomialLRT | 50 | 500 | CC | 0.03     | 0.949 | 0.919 | 0.985 | 0.596 | 10.600 |
| MultinomialLRT | 50 | 500 | CC | 0.05     | 0.890 | 0.930 | 0.966 | 0.624 | 11.650 |
| MultinomialLRT | 50 | 500 | CC | 0.08     | 0.852 | 0.936 | 0.940 | 0.642 | 12.750 |
| CondGaussLRT   | 50 | 100 | CC | 1.00E-04 | 0.995 | 0.598 | 1.000 | 0.023 | 23.800 |
| CondGaussLRT   | 50 | 100 | CC | 0.001    | 0.995 | 0.664 | 0.929 | 0.063 | 22.100 |
| CondGaussLRT   | 50 | 100 | CC | 0.01     | 0.959 | 0.745 | 0.951 | 0.122 | 20.050 |
| CondGaussLRT   | 50 | 100 | CC | 0.03     | 0.980 | 0.782 | 0.958 | 0.178 | 18.100 |
| CondGaussLRT   | 50 | 100 | CC | 0.05     | 0.965 | 0.805 | 0.962 | 0.202 | 17.550 |
| CondGaussLRT   | 50 | 100 | CC | 0.08     | 0.929 | 0.827 | 0.965 | 0.239 | 17.050 |
| CondGaussLRT   | 50 | 300 | CC | 1.00E-04 | 0.991 | 0.753 | 0.899 | 0.160 | 20.750 |
| CondGaussLRT   | 50 | 300 | CC | 0.001    | 0.987 | 0.779 | 0.865 | 0.181 | 19.950 |
| CondGaussLRT   | 50 | 300 | CC | 0.01     | 0.976 | 0.812 | 0.878 | 0.228 | 18.650 |
| CondGaussLRT   | 50 | 300 | CC | 0.03     | 0.993 | 0.837 | 0.931 | 0.260 | 17.300 |
| CondGaussLRT   | 50 | 300 | CC | 0.05     | 0.976 | 0.846 | 0.938 | 0.284 | 16.950 |
| CondGaussLRT   | 50 | 300 | CC | 0.08     | 0.957 | 0.861 | 0.946 | 0.302 | 16.450 |
| CondGaussLRT   | 50 | 500 | CC | 1.00E-04 | 0.989 | 0.853 | 0.984 | 0.321 | 16.050 |
| CondGaussLRT   | 50 | 500 | CC | 0.001    | 0.990 | 0.876 | 0.977 | 0.377 | 14.700 |
| CondGaussLRT   | 50 | 500 | CC | 0.01     | 0.987 | 0.896 | 0.980 | 0.428 | 13.200 |
| CondGaussLRT   | 50 | 500 | CC | 0.03     | 0.976 | 0.905 | 0.976 | 0.465 | 12.700 |
| CondGaussLRT   | 50 | 500 | CC | 0.05     | 0.961 | 0.913 | 0.975 | 0.476 | 12.650 |
| CondGaussLRT   | 50 | 500 | CC | 0.08     | 0.954 | 0.920 | 0.969 | 0.476 | 12.850 |
| FisherZ        | 50 | 100 | CD | 1.00E-04 | 1.000 | 0.161 | NaN   | 0.000 | 64.100 |
| FisherZ        | 50 | 100 | CD | 0.001    | 0.960 | 0.221 | 1.000 | 0.003 | 62.300 |
| FisherZ        | 50 | 100 | CD | 0.01     | 0.817 | 0.293 | 0.952 | 0.020 | 62.650 |
| FisherZ        | 50 | 100 | CD | 0.03     | 0.721 | 0.338 | 0.744 | 0.030 | 64.950 |
| FisherZ        | 50 | 100 | CD | 0.05     | 0.652 | 0.365 | 0.828 | 0.049 | 67.700 |
| FisherZ        | 50 | 100 | CD | 0.08     | 0.562 | 0.385 | 0.738 | 0.059 | 74.100 |
| FisherZ        | 50 | 300 | CD | 1.00E-04 | 0.982 | 0.330 | 1.000 | 0.010 | 64.950 |
| FisherZ        | 50 | 300 | CD | 0.001    | 0.973 | 0.383 | 0.950 | 0.020 | 63.000 |
| FisherZ        | 50 | 300 | CD | 0.01     | 0.888 | 0.457 | 0.819 | 0.057 | 62.100 |
| FisherZ        | 50 | 300 | CD | 0.03     | 0.768 | 0.498 | 0.835 | 0.095 | 65.900 |
| FisherZ        | 50 | 300 | CD | 0.05     | 0.677 | 0.514 | 0.784 | 0.112 | 71.000 |

## EVALUATION OF CAUSAL STRUCTURE LEARNING

|                |    |     |    |          |       |       |       |       |        |
|----------------|----|-----|----|----------|-------|-------|-------|-------|--------|
| FisherZ        | 50 | 300 | CD | 0.08     | 0.618 | 0.547 | 0.735 | 0.147 | 76.500 |
| FisherZ        | 50 | 500 | CD | 1.00E-04 | 0.968 | 0.386 | 0.958 | 0.037 | 57.850 |
| FisherZ        | 50 | 500 | CD | 0.001    | 0.943 | 0.445 | 0.973 | 0.061 | 55.850 |
| FisherZ        | 50 | 500 | CD | 0.01     | 0.869 | 0.520 | 0.876 | 0.100 | 55.850 |
| FisherZ        | 50 | 500 | CD | 0.03     | 0.753 | 0.552 | 0.717 | 0.146 | 61.100 |
| FisherZ        | 50 | 500 | CD | 0.05     | 0.687 | 0.585 | 0.650 | 0.173 | 65.800 |
| FisherZ        | 50 | 500 | CD | 0.08     | 0.622 | 0.615 | 0.648 | 0.206 | 71.700 |
| ChiSquare      | 50 | 100 | CD | 1.00E-04 | 1.000 | 0.107 | NaN   | 0.000 | 66.050 |
| ChiSquare      | 50 | 100 | CD | 0.001    | 1.000 | 0.163 | NaN   | 0.000 | 64.700 |
| ChiSquare      | 50 | 100 | CD | 0.01     | 0.978 | 0.228 | NaN   | 0.000 | 62.550 |
| ChiSquare      | 50 | 100 | CD | 0.03     | 0.929 | 0.254 | NaN   | 0.000 | 61.850 |
| ChiSquare      | 50 | 100 | CD | 0.05     | 0.957 | 0.279 | 0.250 | 0.001 | 60.950 |
| ChiSquare      | 50 | 100 | CD | 0.08     | 0.955 | 0.311 | 0.000 | 0.000 | 60.450 |
| ChiSquare      | 50 | 300 | CD | 1.00E-04 | 0.997 | 0.338 | 0.500 | 0.005 | 64.700 |
| ChiSquare      | 50 | 300 | CD | 0.001    | 0.997 | 0.378 | 1.000 | 0.005 | 63.250 |
| ChiSquare      | 50 | 300 | CD | 0.01     | 0.973 | 0.439 | 0.556 | 0.007 | 61.850 |
| ChiSquare      | 50 | 300 | CD | 0.03     | 0.969 | 0.480 | 0.738 | 0.012 | 60.250 |
| ChiSquare      | 50 | 300 | CD | 0.05     | 0.982 | 0.502 | 0.833 | 0.022 | 58.950 |
| ChiSquare      | 50 | 300 | CD | 0.08     | 0.974 | 0.547 | 0.654 | 0.033 | 57.650 |
| ChiSquare      | 50 | 500 | CD | 1.00E-04 | 0.997 | 0.429 | NaN   | 0.000 | 57.200 |
| ChiSquare      | 50 | 500 | CD | 0.001    | 0.991 | 0.485 | 1.000 | 0.002 | 55.300 |
| ChiSquare      | 50 | 500 | CD | 0.01     | 0.987 | 0.552 | 0.667 | 0.006 | 52.950 |
| ChiSquare      | 50 | 500 | CD | 0.03     | 0.987 | 0.595 | 0.833 | 0.009 | 51.450 |
| ChiSquare      | 50 | 500 | CD | 0.05     | 0.977 | 0.617 | 1.000 | 0.019 | 50.600 |
| ChiSquare      | 50 | 500 | CD | 0.08     | 0.968 | 0.643 | 0.773 | 0.033 | 49.850 |
| MultinomialLRT | 50 | 100 | CD | 1.00E-04 | 0.996 | 0.412 | NaN   | 0.000 | 56.800 |
| MultinomialLRT | 50 | 100 | CD | 0.001    | 0.976 | 0.487 | 0.571 | 0.007 | 54.100 |
| MultinomialLRT | 50 | 100 | CD | 0.01     | 0.861 | 0.586 | 0.792 | 0.025 | 54.500 |
| MultinomialLRT | 50 | 100 | CD | 0.03     | 0.771 | 0.641 | 0.806 | 0.050 | 57.350 |
| MultinomialLRT | 50 | 100 | CD | 0.05     | 0.730 | 0.668 | 0.644 | 0.070 | 59.700 |
| MultinomialLRT | 50 | 100 | CD | 0.08     | 0.668 | 0.686 | 0.615 | 0.090 | 65.350 |
| MultinomialLRT | 50 | 300 | CD | 1.00E-04 | 0.998 | 0.613 | 1.000 | 0.052 | 52.850 |
| MultinomialLRT | 50 | 300 | CD | 0.001    | 0.994 | 0.680 | 0.922 | 0.087 | 49.800 |
| MultinomialLRT | 50 | 300 | CD | 0.01     | 0.943 | 0.749 | 0.981 | 0.152 | 46.700 |
| MultinomialLRT | 50 | 300 | CD | 0.03     | 0.857 | 0.783 | 0.935 | 0.203 | 48.900 |
| MultinomialLRT | 50 | 300 | CD | 0.05     | 0.814 | 0.800 | 0.855 | 0.234 | 50.350 |
| MultinomialLRT | 50 | 300 | CD | 0.08     | 0.752 | 0.811 | 0.809 | 0.262 | 55.250 |
| MultinomialLRT | 50 | 500 | CD | 1.00E-04 | 0.993 | 0.742 | 0.976 | 0.139 | 41.250 |
| MultinomialLRT | 50 | 500 | CD | 0.001    | 0.982 | 0.778 | 0.974 | 0.184 | 38.800 |
| MultinomialLRT | 50 | 500 | CD | 0.01     | 0.910 | 0.832 | 0.965 | 0.266 | 37.950 |
| MultinomialLRT | 50 | 500 | CD | 0.03     | 0.858 | 0.865 | 0.976 | 0.316 | 38.650 |
| MultinomialLRT | 50 | 500 | CD | 0.05     | 0.807 | 0.877 | 0.898 | 0.350 | 42.150 |
| MultinomialLRT | 50 | 500 | CD | 0.08     | 0.746 | 0.892 | 0.890 | 0.395 | 47.000 |
| CondGaussLRT   | 50 | 100 | CD | 1.00E-04 | 1.000 | 0.175 | NaN   | 0.000 | 65.150 |
| CondGaussLRT   | 50 | 100 | CD | 0.001    | 1.000 | 0.188 | 1.000 | 0.002 | 64.800 |

|              |    |     |    |          |       |       |       |       |        |
|--------------|----|-----|----|----------|-------|-------|-------|-------|--------|
| CondGaussLRT | 50 | 100 | CD | 0.01     | 0.923 | 0.156 | 1.000 | 0.006 | 65.350 |
| CondGaussLRT | 50 | 100 | CD | 0.03     | 0.983 | 0.144 | 1.000 | 0.005 | 64.950 |
| CondGaussLRT | 50 | 100 | CD | 0.05     | 0.983 | 0.130 | 1.000 | 0.009 | 65.050 |
| CondGaussLRT | 50 | 100 | CD | 0.08     | 0.963 | 0.138 | 1.000 | 0.009 | 64.950 |
| CondGaussLRT | 50 | 300 | CD | 1.00E-04 | 1.000 | 0.367 | 1.000 | 0.002 | 64.050 |
| CondGaussLRT | 50 | 300 | CD | 0.001    | 0.991 | 0.378 | 1.000 | 0.003 | 64.300 |
| CondGaussLRT | 50 | 300 | CD | 0.01     | 0.980 | 0.381 | 1.000 | 0.016 | 64.350 |
| CondGaussLRT | 50 | 300 | CD | 0.03     | 0.955 | 0.381 | 1.000 | 0.028 | 64.950 |
| CondGaussLRT | 50 | 300 | CD | 0.05     | 0.930 | 0.376 | 0.962 | 0.046 | 65.400 |
| CondGaussLRT | 50 | 300 | CD | 0.08     | 0.934 | 0.372 | 0.958 | 0.049 | 65.300 |
| CondGaussLRT | 50 | 500 | CD | 1.00E-04 | 1.000 | 0.475 | 1.000 | 0.018 | 55.100 |
| CondGaussLRT | 50 | 500 | CD | 0.001    | 1.000 | 0.482 | 0.972 | 0.025 | 54.900 |
| CondGaussLRT | 50 | 500 | CD | 0.01     | 0.982 | 0.481 | 0.946 | 0.036 | 55.250 |
| CondGaussLRT | 50 | 500 | CD | 0.03     | 0.960 | 0.488 | 0.914 | 0.054 | 55.150 |
| CondGaussLRT | 50 | 500 | CD | 0.05     | 0.956 | 0.491 | 0.892 | 0.055 | 55.100 |
| CondGaussLRT | 50 | 500 | CD | 0.08     | 0.930 | 0.482 | 0.912 | 0.062 | 56.300 |
| FisherZ      | 50 | 100 | DD | 1.00E-04 | 1.000 | 0.099 | NaN   | 0.000 | 30.000 |
| FisherZ      | 50 | 100 | DD | 0.001    | 0.938 | 0.137 | 1.000 | 0.003 | 29.450 |
| FisherZ      | 50 | 100 | DD | 0.01     | 0.690 | 0.211 | 1.000 | 0.012 | 30.250 |
| FisherZ      | 50 | 100 | DD | 0.03     | 0.587 | 0.259 | 0.600 | 0.014 | 32.800 |
| FisherZ      | 50 | 100 | DD | 0.05     | 0.487 | 0.275 | 0.800 | 0.018 | 35.900 |
| FisherZ      | 50 | 100 | DD | 0.08     | 0.405 | 0.319 | 0.561 | 0.070 | 39.350 |
| FisherZ      | 50 | 300 | DD | 1.00E-04 | 0.963 | 0.195 | NaN   | 0.000 | 35.950 |
| FisherZ      | 50 | 300 | DD | 0.001    | 0.959 | 0.252 | 1.000 | 0.002 | 35.000 |
| FisherZ      | 50 | 300 | DD | 0.01     | 0.804 | 0.333 | 0.708 | 0.010 | 35.850 |
| FisherZ      | 50 | 300 | DD | 0.03     | 0.638 | 0.390 | 0.688 | 0.026 | 39.250 |
| FisherZ      | 50 | 300 | DD | 0.05     | 0.558 | 0.421 | 0.674 | 0.037 | 42.200 |
| FisherZ      | 50 | 300 | DD | 0.08     | 0.469 | 0.447 | 0.363 | 0.050 | 48.350 |
| FisherZ      | 50 | 500 | DD | 1.00E-04 | 0.965 | 0.286 | 0.000 | 0.000 | 31.550 |
| FisherZ      | 50 | 500 | DD | 0.001    | 0.943 | 0.383 | 0.833 | 0.007 | 30.300 |
| FisherZ      | 50 | 500 | DD | 0.01     | 0.853 | 0.482 | 0.688 | 0.019 | 30.400 |
| FisherZ      | 50 | 500 | DD | 0.03     | 0.705 | 0.539 | 0.604 | 0.061 | 33.300 |
| FisherZ      | 50 | 500 | DD | 0.05     | 0.643 | 0.565 | 0.607 | 0.103 | 35.650 |
| FisherZ      | 50 | 500 | DD | 0.08     | 0.562 | 0.612 | 0.560 | 0.117 | 40.850 |
| ChiSquare    | 50 | 100 | DD | 1.00E-04 | 1.000 | 0.254 | NaN   | 0.000 | 28.350 |
| ChiSquare    | 50 | 100 | DD | 0.001    | 1.000 | 0.308 | NaN   | 0.000 | 27.850 |
| ChiSquare    | 50 | 100 | DD | 0.01     | 0.961 | 0.406 | NaN   | 0.000 | 26.700 |
| ChiSquare    | 50 | 100 | DD | 0.03     | 0.943 | 0.445 | NaN   | 0.000 | 26.250 |
| ChiSquare    | 50 | 100 | DD | 0.05     | 0.947 | 0.472 | NaN   | 0.000 | 25.750 |
| ChiSquare    | 50 | 100 | DD | 0.08     | 0.911 | 0.491 | 0.000 | 0.000 | 26.100 |
| ChiSquare    | 50 | 300 | DD | 1.00E-04 | 0.994 | 0.490 | 0.000 | 0.000 | 31.000 |
| ChiSquare    | 50 | 300 | DD | 0.001    | 0.996 | 0.532 | NaN   | 0.000 | 29.850 |
| ChiSquare    | 50 | 300 | DD | 0.01     | 0.987 | 0.610 | 1.000 | 0.009 | 28.450 |
| ChiSquare    | 50 | 300 | DD | 0.03     | 0.960 | 0.645 | 0.500 | 0.009 | 28.600 |
| ChiSquare    | 50 | 300 | DD | 0.05     | 0.953 | 0.700 | 0.750 | 0.017 | 27.650 |

## EVALUATION OF CAUSAL STRUCTURE LEARNING

|                |    |     |     |          |       |       |       |       |         |
|----------------|----|-----|-----|----------|-------|-------|-------|-------|---------|
| ChiSquare      | 50 | 300 | DD  | 0.08     | 0.963 | 0.717 | 0.850 | 0.043 | 26.700  |
| ChiSquare      | 50 | 500 | DD  | 1.00E-04 | 0.993 | 0.630 | NaN   | 0.000 | 25.650  |
| ChiSquare      | 50 | 500 | DD  | 0.001    | 0.989 | 0.681 | NaN   | 0.000 | 24.750  |
| ChiSquare      | 50 | 500 | DD  | 0.01     | 0.985 | 0.746 | 0.500 | 0.002 | 23.550  |
| ChiSquare      | 50 | 500 | DD  | 0.03     | 0.972 | 0.802 | 1.000 | 0.014 | 22.950  |
| ChiSquare      | 50 | 500 | DD  | 0.05     | 0.977 | 0.822 | 0.933 | 0.020 | 22.350  |
| ChiSquare      | 50 | 500 | DD  | 0.08     | 0.970 | 0.852 | 0.660 | 0.025 | 21.950  |
| MultinomialLRT | 50 | 100 | DD  | 1.00E-04 | 0.985 | 0.425 | NaN   | 0.000 | 26.150  |
| MultinomialLRT | 50 | 100 | DD  | 0.001    | 0.926 | 0.511 | 0.667 | 0.007 | 25.400  |
| MultinomialLRT | 50 | 100 | DD  | 0.01     | 0.772 | 0.578 | 0.778 | 0.034 | 27.350  |
| MultinomialLRT | 50 | 100 | DD  | 0.03     | 0.665 | 0.626 | 0.652 | 0.060 | 30.750  |
| MultinomialLRT | 50 | 100 | DD  | 0.05     | 0.575 | 0.641 | 0.584 | 0.114 | 33.500  |
| MultinomialLRT | 50 | 100 | DD  | 0.08     | 0.523 | 0.690 | 0.496 | 0.138 | 37.600  |
| MultinomialLRT | 50 | 300 | DD  | 1.00E-04 | 1.000 | 0.730 | 1.000 | 0.058 | 24.900  |
| MultinomialLRT | 50 | 300 | DD  | 0.001    | 0.989 | 0.793 | 0.964 | 0.095 | 23.400  |
| MultinomialLRT | 50 | 300 | DD  | 0.01     | 0.924 | 0.850 | 1.000 | 0.145 | 23.100  |
| MultinomialLRT | 50 | 300 | DD  | 0.03     | 0.822 | 0.877 | 0.917 | 0.227 | 24.650  |
| MultinomialLRT | 50 | 300 | DD  | 0.05     | 0.755 | 0.893 | 0.818 | 0.265 | 26.900  |
| MultinomialLRT | 50 | 300 | DD  | 0.08     | 0.677 | 0.911 | 0.762 | 0.288 | 31.300  |
| MultinomialLRT | 50 | 500 | DD  | 1.00E-04 | 0.997 | 0.869 | 0.942 | 0.085 | 19.600  |
| MultinomialLRT | 50 | 500 | DD  | 0.001    | 0.997 | 0.910 | 0.875 | 0.131 | 18.050  |
| MultinomialLRT | 50 | 500 | DD  | 0.01     | 0.922 | 0.949 | 0.935 | 0.214 | 17.400  |
| MultinomialLRT | 50 | 500 | DD  | 0.03     | 0.813 | 0.957 | 0.934 | 0.290 | 20.250  |
| MultinomialLRT | 50 | 500 | DD  | 0.05     | 0.724 | 0.961 | 0.900 | 0.354 | 24.100  |
| MultinomialLRT | 50 | 500 | DD  | 0.08     | 0.660 | 0.970 | 0.815 | 0.367 | 28.550  |
| CondGaussLRT   | 50 | 100 | DD  | 1.00E-04 | 1.000 | 0.160 | NaN   | 0.000 | 29.600  |
| CondGaussLRT   | 50 | 100 | DD  | 0.001    | 1.000 | 0.220 | 1.000 | 0.005 | 28.900  |
| CondGaussLRT   | 50 | 100 | DD  | 0.01     | 1.000 | 0.231 | 1.000 | 0.008 | 28.500  |
| CondGaussLRT   | 50 | 100 | DD  | 0.03     | 1.000 | 0.253 | 1.000 | 0.005 | 28.200  |
| CondGaussLRT   | 50 | 100 | DD  | 0.05     | 1.000 | 0.238 | 1.000 | 0.005 | 28.300  |
| CondGaussLRT   | 50 | 100 | DD  | 0.08     | 1.000 | 0.264 | 1.000 | 0.011 | 28.000  |
| CondGaussLRT   | 50 | 300 | DD  | 1.00E-04 | 1.000 | 0.366 | NaN   | 0.000 | 33.350  |
| CondGaussLRT   | 50 | 300 | DD  | 0.001    | 1.000 | 0.350 | NaN   | 0.000 | 33.850  |
| CondGaussLRT   | 50 | 300 | DD  | 0.01     | 0.984 | 0.341 | NaN   | 0.000 | 34.300  |
| CondGaussLRT   | 50 | 300 | DD  | 0.03     | 0.979 | 0.336 | 1.000 | 0.003 | 34.500  |
| CondGaussLRT   | 50 | 300 | DD  | 0.05     | 0.983 | 0.324 | 1.000 | 0.003 | 34.500  |
| CondGaussLRT   | 50 | 300 | DD  | 0.08     | 0.973 | 0.334 | NaN   | 0.000 | 34.500  |
| CondGaussLRT   | 50 | 500 | DD  | 1.00E-04 | 1.000 | 0.433 | NaN   | 0.000 | 29.400  |
| CondGaussLRT   | 50 | 500 | DD  | 0.001    | 1.000 | 0.464 | 1.000 | 0.002 | 28.850  |
| CondGaussLRT   | 50 | 500 | DD  | 0.01     | 0.992 | 0.455 | 1.000 | 0.004 | 29.300  |
| CondGaussLRT   | 50 | 500 | DD  | 0.03     | 0.994 | 0.433 | 0.500 | 0.005 | 29.600  |
| CondGaussLRT   | 50 | 500 | DD  | 0.05     | 0.994 | 0.431 | 0.500 | 0.007 | 29.600  |
| CondGaussLRT   | 50 | 500 | DD  | 0.08     | 0.993 | 0.417 | 0.625 | 0.009 | 29.750  |
| FisherZ        | 50 | 100 | All | 1.00E-04 | 0.992 | 0.272 | 0.778 | 0.014 | 116.450 |
| FisherZ        | 50 | 100 | All | 0.001    | 0.981 | 0.327 | 0.917 | 0.025 | 112.350 |

|                |    |     |     |          |       |       |       |       |         |
|----------------|----|-----|-----|----------|-------|-------|-------|-------|---------|
| FisherZ        | 50 | 100 | All | 0.01     | 0.857 | 0.402 | 0.960 | 0.058 | 111.600 |
| FisherZ        | 50 | 100 | All | 0.03     | 0.744 | 0.441 | 0.869 | 0.074 | 117.650 |
| FisherZ        | 50 | 100 | All | 0.05     | 0.671 | 0.468 | 0.916 | 0.095 | 124.250 |
| FisherZ        | 50 | 100 | All | 0.08     | 0.593 | 0.490 | 0.787 | 0.129 | 135.800 |
| FisherZ        | 50 | 300 | All | 1.00E-04 | 0.978 | 0.405 | 0.932 | 0.055 | 119.800 |
| FisherZ        | 50 | 300 | All | 0.001    | 0.965 | 0.450 | 0.949 | 0.069 | 116.400 |
| FisherZ        | 50 | 300 | All | 0.01     | 0.884 | 0.521 | 0.890 | 0.111 | 115.200 |
| FisherZ        | 50 | 300 | All | 0.03     | 0.772 | 0.561 | 0.832 | 0.141 | 123.050 |
| FisherZ        | 50 | 300 | All | 0.05     | 0.695 | 0.581 | 0.802 | 0.163 | 132.200 |
| FisherZ        | 50 | 300 | All | 0.08     | 0.624 | 0.607 | 0.732 | 0.193 | 145.500 |
| FisherZ        | 50 | 500 | All | 1.00E-04 | 0.949 | 0.481 | 0.960 | 0.094 | 105.850 |
| FisherZ        | 50 | 500 | All | 0.001    | 0.934 | 0.539 | 0.966 | 0.122 | 101.450 |
| FisherZ        | 50 | 500 | All | 0.01     | 0.867 | 0.610 | 0.912 | 0.174 | 100.700 |
| FisherZ        | 50 | 500 | All | 0.03     | 0.764 | 0.641 | 0.795 | 0.215 | 110.050 |
| FisherZ        | 50 | 500 | All | 0.05     | 0.703 | 0.664 | 0.755 | 0.239 | 119.000 |
| FisherZ        | 50 | 500 | All | 0.08     | 0.636 | 0.691 | 0.722 | 0.270 | 132.650 |
| ChiSquare      | 50 | 100 | All | 1.00E-04 | 0.988 | 0.177 | NaN   | 0.000 | 124.050 |
| ChiSquare      | 50 | 100 | All | 0.001    | 0.992 | 0.225 | NaN   | 0.000 | 121.650 |
| ChiSquare      | 50 | 100 | All | 0.01     | 0.968 | 0.312 | NaN   | 0.000 | 116.650 |
| ChiSquare      | 50 | 100 | All | 0.03     | 0.946 | 0.345 | NaN   | 0.000 | 115.150 |
| ChiSquare      | 50 | 100 | All | 0.05     | 0.953 | 0.367 | 0.500 | 0.002 | 113.600 |
| ChiSquare      | 50 | 100 | All | 0.08     | 0.932 | 0.397 | 0.500 | 0.002 | 113.000 |
| ChiSquare      | 50 | 300 | All | 1.00E-04 | 0.993 | 0.416 | 0.500 | 0.002 | 123.100 |
| ChiSquare      | 50 | 300 | All | 0.001    | 0.993 | 0.461 | 0.750 | 0.003 | 119.650 |
| ChiSquare      | 50 | 300 | All | 0.01     | 0.974 | 0.523 | 0.750 | 0.008 | 116.250 |
| ChiSquare      | 50 | 300 | All | 0.03     | 0.953 | 0.559 | 0.642 | 0.013 | 114.950 |
| ChiSquare      | 50 | 300 | All | 0.05     | 0.959 | 0.586 | 0.708 | 0.020 | 112.400 |
| ChiSquare      | 50 | 300 | All | 0.08     | 0.955 | 0.619 | 0.732 | 0.038 | 110.050 |
| ChiSquare      | 50 | 500 | All | 1.00E-04 | 0.996 | 0.528 | 1.000 | 0.011 | 107.300 |
| ChiSquare      | 50 | 500 | All | 0.001    | 0.988 | 0.579 | 1.000 | 0.015 | 103.650 |
| ChiSquare      | 50 | 500 | All | 0.01     | 0.980 | 0.643 | 0.867 | 0.020 | 99.600  |
| ChiSquare      | 50 | 500 | All | 0.03     | 0.968 | 0.685 | 0.897 | 0.031 | 97.450  |
| ChiSquare      | 50 | 500 | All | 0.05     | 0.958 | 0.705 | 0.958 | 0.047 | 95.500  |
| ChiSquare      | 50 | 500 | All | 0.08     | 0.954 | 0.731 | 0.882 | 0.060 | 93.700  |
| MultinomialLRT | 50 | 100 | All | 1.00E-04 | 0.993 | 0.456 | 0.900 | 0.007 | 106.350 |
| MultinomialLRT | 50 | 100 | All | 0.001    | 0.970 | 0.537 | 0.910 | 0.027 | 100.400 |
| MultinomialLRT | 50 | 100 | All | 0.01     | 0.862 | 0.616 | 0.801 | 0.057 | 101.500 |
| MultinomialLRT | 50 | 100 | All | 0.03     | 0.773 | 0.661 | 0.788 | 0.090 | 107.100 |
| MultinomialLRT | 50 | 100 | All | 0.05     | 0.724 | 0.693 | 0.692 | 0.120 | 112.250 |
| MultinomialLRT | 50 | 100 | All | 0.08     | 0.667 | 0.721 | 0.674 | 0.161 | 121.500 |
| MultinomialLRT | 50 | 300 | All | 1.00E-04 | 0.996 | 0.680 | 0.939 | 0.091 | 97.200  |
| MultinomialLRT | 50 | 300 | All | 0.001    | 0.990 | 0.737 | 0.924 | 0.135 | 91.200  |
| MultinomialLRT | 50 | 300 | All | 0.01     | 0.944 | 0.796 | 0.971 | 0.198 | 85.250  |
| MultinomialLRT | 50 | 300 | All | 0.03     | 0.860 | 0.826 | 0.931 | 0.255 | 89.150  |
| MultinomialLRT | 50 | 300 | All | 0.05     | 0.815 | 0.843 | 0.864 | 0.288 | 92.400  |

## EVALUATION OF CAUSAL STRUCTURE LEARNING

|                |     |     |     |          |       |       |       |       |         |
|----------------|-----|-----|-----|----------|-------|-------|-------|-------|---------|
| MultinomialLRT | 50  | 300 | All | 0.08     | 0.748 | 0.858 | 0.821 | 0.317 | 103.200 |
| MultinomialLRT | 50  | 500 | All | 1.00E-04 | 0.992 | 0.803 | 0.968 | 0.189 | 75.200  |
| MultinomialLRT | 50  | 500 | All | 0.001    | 0.985 | 0.840 | 0.970 | 0.246 | 68.750  |
| MultinomialLRT | 50  | 500 | All | 0.01     | 0.925 | 0.883 | 0.972 | 0.325 | 65.800  |
| MultinomialLRT | 50  | 500 | All | 0.03     | 0.863 | 0.901 | 0.965 | 0.374 | 69.500  |
| MultinomialLRT | 50  | 500 | All | 0.05     | 0.800 | 0.912 | 0.919 | 0.414 | 77.900  |
| MultinomialLRT | 50  | 500 | All | 0.08     | 0.742 | 0.923 | 0.885 | 0.445 | 88.300  |
| CondGaussLRT   | 50  | 100 | All | 1.00E-04 | 0.997 | 0.272 | 1.000 | 0.005 | 118.550 |
| CondGaussLRT   | 50  | 100 | All | 0.001    | 0.997 | 0.310 | 0.938 | 0.018 | 115.800 |
| CondGaussLRT   | 50  | 100 | All | 0.01     | 0.956 | 0.319 | 0.955 | 0.035 | 113.900 |
| CondGaussLRT   | 50  | 100 | All | 0.03     | 0.983 | 0.327 | 0.961 | 0.048 | 111.250 |
| CondGaussLRT   | 50  | 100 | All | 0.05     | 0.973 | 0.326 | 0.964 | 0.058 | 110.900 |
| CondGaussLRT   | 50  | 100 | All | 0.08     | 0.952 | 0.340 | 0.968 | 0.068 | 110.000 |
| CondGaussLRT   | 50  | 300 | All | 1.00E-04 | 0.996 | 0.452 | 0.899 | 0.039 | 118.150 |
| CondGaussLRT   | 50  | 300 | All | 0.001    | 0.988 | 0.459 | 0.865 | 0.045 | 118.100 |
| CondGaussLRT   | 50  | 300 | All | 0.01     | 0.980 | 0.466 | 0.885 | 0.063 | 117.300 |
| CondGaussLRT   | 50  | 300 | All | 0.03     | 0.968 | 0.472 | 0.935 | 0.078 | 116.750 |
| CondGaussLRT   | 50  | 300 | All | 0.05     | 0.953 | 0.467 | 0.929 | 0.093 | 116.850 |
| CondGaussLRT   | 50  | 300 | All | 0.08     | 0.949 | 0.470 | 0.931 | 0.099 | 116.250 |
| CondGaussLRT   | 50  | 500 | All | 1.00E-04 | 0.995 | 0.554 | 0.984 | 0.082 | 100.550 |
| CondGaussLRT   | 50  | 500 | All | 0.001    | 0.995 | 0.572 | 0.970 | 0.099 | 98.450  |
| CondGaussLRT   | 50  | 500 | All | 0.01     | 0.984 | 0.573 | 0.968 | 0.118 | 97.750  |
| CondGaussLRT   | 50  | 500 | All | 0.03     | 0.966 | 0.574 | 0.953 | 0.137 | 97.450  |
| CondGaussLRT   | 50  | 500 | All | 0.05     | 0.961 | 0.576 | 0.934 | 0.141 | 97.350  |
| CondGaussLRT   | 50  | 500 | All | 0.08     | 0.941 | 0.571 | 0.940 | 0.145 | 98.900  |
| FisherZ        | 100 | 100 | CC  | 1.00E-04 | 0.991 | 0.609 | 0.975 | 0.048 | 45.500  |
| FisherZ        | 100 | 100 | CC  | 0.001    | 0.986 | 0.661 | 0.970 | 0.077 | 42.700  |
| FisherZ        | 100 | 100 | CC  | 0.01     | 0.904 | 0.738 | 0.980 | 0.144 | 41.300  |
| FisherZ        | 100 | 100 | CC  | 0.03     | 0.839 | 0.773 | 0.921 | 0.201 | 42.150  |
| FisherZ        | 100 | 100 | CC  | 0.05     | 0.777 | 0.802 | 0.850 | 0.242 | 44.350  |
| FisherZ        | 100 | 100 | CC  | 0.08     | 0.697 | 0.827 | 0.816 | 0.302 | 49.800  |
| FisherZ        | 100 | 300 | CC  | 1.00E-04 | 0.985 | 0.845 | 0.971 | 0.224 | 33.450  |
| FisherZ        | 100 | 300 | CC  | 0.001    | 0.968 | 0.876 | 0.981 | 0.309 | 29.650  |
| FisherZ        | 100 | 300 | CC  | 0.01     | 0.912 | 0.909 | 0.975 | 0.379 | 28.850  |
| FisherZ        | 100 | 300 | CC  | 0.03     | 0.812 | 0.922 | 0.948 | 0.436 | 32.850  |
| FisherZ        | 100 | 300 | CC  | 0.05     | 0.752 | 0.929 | 0.916 | 0.460 | 37.600  |
| FisherZ        | 100 | 300 | CC  | 0.08     | 0.688 | 0.932 | 0.767 | 0.469 | 45.250  |
| FisherZ        | 100 | 500 | CC  | 1.00E-04 | 0.982 | 0.902 | 0.980 | 0.430 | 26.900  |
| FisherZ        | 100 | 500 | CC  | 0.001    | 0.976 | 0.918 | 0.977 | 0.478 | 25.000  |
| FisherZ        | 100 | 500 | CC  | 0.01     | 0.929 | 0.946 | 0.969 | 0.539 | 24.900  |
| FisherZ        | 100 | 500 | CC  | 0.03     | 0.870 | 0.955 | 0.926 | 0.565 | 29.050  |
| FisherZ        | 100 | 500 | CC  | 0.05     | 0.822 | 0.956 | 0.908 | 0.584 | 33.200  |
| FisherZ        | 100 | 500 | CC  | 0.08     | 0.744 | 0.958 | 0.874 | 0.600 | 41.400  |
| ChiSquare      | 100 | 100 | CC  | 1.00E-04 | 0.969 | 0.250 | NaN   | 0.000 | 57.900  |
| ChiSquare      | 100 | 100 | CC  | 0.001    | 0.954 | 0.291 | NaN   | 0.000 | 56.750  |

|                |     |     |    |          |       |       |       |       |        |
|----------------|-----|-----|----|----------|-------|-------|-------|-------|--------|
| ChiSquare      | 100 | 100 | CC | 0.01     | 0.919 | 0.355 | NaN   | 0.000 | 56.150 |
| ChiSquare      | 100 | 100 | CC | 0.03     | 0.942 | 0.421 | 0.750 | 0.005 | 53.950 |
| ChiSquare      | 100 | 100 | CC | 0.05     | 0.949 | 0.434 | 0.625 | 0.007 | 53.300 |
| ChiSquare      | 100 | 100 | CC | 0.08     | 0.933 | 0.469 | 0.625 | 0.007 | 52.600 |
| ChiSquare      | 100 | 300 | CC | 1.00E-04 | 0.986 | 0.490 | 1.000 | 0.002 | 53.700 |
| ChiSquare      | 100 | 300 | CC | 0.001    | 0.982 | 0.533 | 1.000 | 0.002 | 52.550 |
| ChiSquare      | 100 | 300 | CC | 0.01     | 0.957 | 0.594 | 1.000 | 0.015 | 50.950 |
| ChiSquare      | 100 | 300 | CC | 0.03     | 0.949 | 0.626 | 0.981 | 0.043 | 49.300 |
| ChiSquare      | 100 | 300 | CC | 0.05     | 0.939 | 0.647 | 0.883 | 0.046 | 49.050 |
| ChiSquare      | 100 | 300 | CC | 0.08     | 0.948 | 0.671 | 0.910 | 0.062 | 47.400 |
| ChiSquare      | 100 | 500 | CC | 1.00E-04 | 0.979 | 0.600 | 1.000 | 0.020 | 53.200 |
| ChiSquare      | 100 | 500 | CC | 0.001    | 0.979 | 0.643 | 1.000 | 0.029 | 51.500 |
| ChiSquare      | 100 | 500 | CC | 0.01     | 0.962 | 0.703 | 0.933 | 0.073 | 48.650 |
| ChiSquare      | 100 | 500 | CC | 0.03     | 0.954 | 0.732 | 0.979 | 0.101 | 47.000 |
| ChiSquare      | 100 | 500 | CC | 0.05     | 0.936 | 0.756 | 0.970 | 0.129 | 46.450 |
| ChiSquare      | 100 | 500 | CC | 0.08     | 0.924 | 0.765 | 0.949 | 0.143 | 46.300 |
| MultinomialLRT | 100 | 100 | CC | 1.00E-04 | 0.997 | 0.587 | 1.000 | 0.042 | 46.150 |
| MultinomialLRT | 100 | 100 | CC | 0.001    | 1.000 | 0.656 | 0.992 | 0.078 | 42.250 |
| MultinomialLRT | 100 | 100 | CC | 0.01     | 0.943 | 0.717 | 0.985 | 0.133 | 40.450 |
| MultinomialLRT | 100 | 100 | CC | 0.03     | 0.895 | 0.767 | 0.967 | 0.193 | 39.300 |
| MultinomialLRT | 100 | 100 | CC | 0.05     | 0.855 | 0.803 | 0.942 | 0.241 | 39.450 |
| MultinomialLRT | 100 | 100 | CC | 0.08     | 0.783 | 0.813 | 0.882 | 0.263 | 44.000 |
| MultinomialLRT | 100 | 300 | CC | 1.00E-04 | 0.997 | 0.794 | 0.944 | 0.193 | 36.000 |
| MultinomialLRT | 100 | 300 | CC | 0.001    | 0.983 | 0.838 | 0.958 | 0.272 | 31.850 |
| MultinomialLRT | 100 | 300 | CC | 0.01     | 0.955 | 0.883 | 0.974 | 0.372 | 27.800 |
| MultinomialLRT | 100 | 300 | CC | 0.03     | 0.884 | 0.902 | 0.871 | 0.431 | 28.650 |
| MultinomialLRT | 100 | 300 | CC | 0.05     | 0.842 | 0.910 | 0.883 | 0.466 | 30.250 |
| MultinomialLRT | 100 | 300 | CC | 0.08     | 0.789 | 0.915 | 0.850 | 0.500 | 33.700 |
| MultinomialLRT | 100 | 500 | CC | 1.00E-04 | 0.996 | 0.885 | 0.986 | 0.462 | 25.500 |
| MultinomialLRT | 100 | 500 | CC | 0.001    | 0.995 | 0.905 | 0.987 | 0.529 | 22.400 |
| MultinomialLRT | 100 | 500 | CC | 0.01     | 0.984 | 0.935 | 0.986 | 0.591 | 19.450 |
| MultinomialLRT | 100 | 500 | CC | 0.03     | 0.952 | 0.943 | 0.969 | 0.633 | 20.050 |
| MultinomialLRT | 100 | 500 | CC | 0.05     | 0.933 | 0.945 | 0.962 | 0.644 | 21.200 |
| MultinomialLRT | 100 | 500 | CC | 0.08     | 0.872 | 0.952 | 0.939 | 0.665 | 25.400 |
| CondGaussLRT   | 100 | 100 | CC | 1.00E-04 | 0.997 | 0.556 | 1.000 | 0.032 | 47.400 |
| CondGaussLRT   | 100 | 100 | CC | 0.001    | 0.997 | 0.617 | 1.000 | 0.046 | 44.850 |
| CondGaussLRT   | 100 | 100 | CC | 0.01     | 0.984 | 0.676 | 0.971 | 0.116 | 40.950 |
| CondGaussLRT   | 100 | 100 | CC | 0.03     | 0.987 | 0.717 | 0.985 | 0.150 | 38.350 |
| CondGaussLRT   | 100 | 100 | CC | 0.05     | 0.960 | 0.749 | 0.986 | 0.182 | 37.400 |
| CondGaussLRT   | 100 | 100 | CC | 0.08     | 0.905 | 0.758 | 0.995 | 0.207 | 38.550 |
| CondGaussLRT   | 100 | 300 | CC | 1.00E-04 | 0.997 | 0.738 | 0.944 | 0.123 | 40.450 |
| CondGaussLRT   | 100 | 300 | CC | 0.001    | 0.992 | 0.778 | 0.978 | 0.167 | 37.500 |
| CondGaussLRT   | 100 | 300 | CC | 0.01     | 0.979 | 0.817 | 0.961 | 0.227 | 34.150 |
| CondGaussLRT   | 100 | 300 | CC | 0.03     | 0.979 | 0.832 | 0.965 | 0.265 | 32.300 |
| CondGaussLRT   | 100 | 300 | CC | 0.05     | 0.971 | 0.840 | 0.975 | 0.289 | 31.250 |



EVALUATION OF CAUSAL STRUCTURE LEARNING

|                |     |     |    |          |       |       |       |       |         |
|----------------|-----|-----|----|----------|-------|-------|-------|-------|---------|
| CondGaussLRT   | 100 | 300 | CC | 0.08     | 0.944 | 0.854 | 0.976 | 0.313 | 31.100  |
| CondGaussLRT   | 100 | 500 | CC | 1.00E-04 | 0.996 | 0.852 | 0.986 | 0.349 | 31.150  |
| CondGaussLRT   | 100 | 500 | CC | 0.001    | 0.996 | 0.880 | 0.987 | 0.411 | 27.900  |
| CondGaussLRT   | 100 | 500 | CC | 0.01     | 0.995 | 0.897 | 0.995 | 0.444 | 25.750  |
| CondGaussLRT   | 100 | 500 | CC | 0.03     | 0.991 | 0.915 | 0.993 | 0.489 | 23.750  |
| CondGaussLRT   | 100 | 500 | CC | 0.05     | 0.983 | 0.928 | 0.994 | 0.509 | 22.900  |
| CondGaussLRT   | 100 | 500 | CC | 0.08     | 0.974 | 0.933 | 0.991 | 0.519 | 23.000  |
| FisherZ        | 100 | 100 | CD | 1.00E-04 | 0.954 | 0.140 | 1.000 | 0.001 | 122.150 |
| FisherZ        | 100 | 100 | CD | 0.001    | 0.910 | 0.188 | 1.000 | 0.004 | 120.650 |
| FisherZ        | 100 | 100 | CD | 0.01     | 0.744 | 0.263 | 0.955 | 0.020 | 124.150 |
| FisherZ        | 100 | 100 | CD | 0.03     | 0.606 | 0.313 | 0.643 | 0.031 | 134.600 |
| FisherZ        | 100 | 100 | CD | 0.05     | 0.511 | 0.342 | 0.525 | 0.042 | 148.350 |
| FisherZ        | 100 | 100 | CD | 0.08     | 0.435 | 0.370 | 0.485 | 0.056 | 166.700 |
| FisherZ        | 100 | 300 | CD | 1.00E-04 | 0.982 | 0.363 | 0.972 | 0.012 | 129.050 |
| FisherZ        | 100 | 300 | CD | 0.001    | 0.957 | 0.418 | 0.988 | 0.031 | 124.500 |
| FisherZ        | 100 | 300 | CD | 0.01     | 0.838 | 0.479 | 0.944 | 0.052 | 127.150 |
| FisherZ        | 100 | 300 | CD | 0.03     | 0.707 | 0.527 | 0.726 | 0.088 | 138.450 |
| FisherZ        | 100 | 300 | CD | 0.05     | 0.619 | 0.555 | 0.723 | 0.106 | 154.000 |
| FisherZ        | 100 | 300 | CD | 0.08     | 0.536 | 0.575 | 0.604 | 0.128 | 177.050 |
| FisherZ        | 100 | 500 | CD | 1.00E-04 | 0.965 | 0.380 | 0.941 | 0.029 | 118.950 |
| FisherZ        | 100 | 500 | CD | 0.001    | 0.936 | 0.443 | 0.917 | 0.058 | 114.550 |
| FisherZ        | 100 | 500 | CD | 0.01     | 0.843 | 0.509 | 0.865 | 0.099 | 116.100 |
| FisherZ        | 100 | 500 | CD | 0.03     | 0.714 | 0.548 | 0.814 | 0.136 | 128.900 |
| FisherZ        | 100 | 500 | CD | 0.05     | 0.637 | 0.574 | 0.792 | 0.172 | 140.150 |
| FisherZ        | 100 | 500 | CD | 0.08     | 0.549 | 0.596 | 0.687 | 0.201 | 162.250 |
| ChiSquare      | 100 | 100 | CD | 1.00E-04 | 0.983 | 0.094 | NaN   | 0.000 | 125.550 |
| ChiSquare      | 100 | 100 | CD | 0.001    | 0.947 | 0.122 | NaN   | 0.000 | 123.950 |
| ChiSquare      | 100 | 100 | CD | 0.01     | 0.952 | 0.170 | 1.000 | 0.001 | 121.100 |
| ChiSquare      | 100 | 100 | CD | 0.03     | 0.955 | 0.219 | NaN   | 0.000 | 118.300 |
| ChiSquare      | 100 | 100 | CD | 0.05     | 0.959 | 0.245 | 0.000 | 0.000 | 117.050 |
| ChiSquare      | 100 | 100 | CD | 0.08     | 0.943 | 0.261 | 1.000 | 0.003 | 116.150 |
| ChiSquare      | 100 | 300 | CD | 1.00E-04 | 0.989 | 0.367 | NaN   | 0.000 | 130.050 |
| ChiSquare      | 100 | 300 | CD | 0.001    | 0.985 | 0.410 | NaN   | 0.000 | 126.900 |
| ChiSquare      | 100 | 300 | CD | 0.01     | 0.979 | 0.482 | 1.000 | 0.004 | 121.600 |
| ChiSquare      | 100 | 300 | CD | 0.03     | 0.978 | 0.533 | 1.000 | 0.008 | 117.900 |
| ChiSquare      | 100 | 300 | CD | 0.05     | 0.974 | 0.554 | 1.000 | 0.015 | 116.200 |
| ChiSquare      | 100 | 300 | CD | 0.08     | 0.971 | 0.573 | 0.908 | 0.032 | 113.950 |
| ChiSquare      | 100 | 500 | CD | 1.00E-04 | 0.998 | 0.434 | 1.000 | 0.003 | 115.500 |
| ChiSquare      | 100 | 500 | CD | 0.001    | 0.997 | 0.483 | 1.000 | 0.008 | 111.750 |
| ChiSquare      | 100 | 500 | CD | 0.01     | 0.986 | 0.546 | 0.846 | 0.023 | 107.300 |
| ChiSquare      | 100 | 500 | CD | 0.03     | 0.973 | 0.591 | 0.764 | 0.030 | 105.100 |
| ChiSquare      | 100 | 500 | CD | 0.05     | 0.963 | 0.613 | 0.865 | 0.045 | 103.550 |
| ChiSquare      | 100 | 500 | CD | 0.08     | 0.961 | 0.635 | 0.863 | 0.064 | 101.100 |
| MultinomialLRT | 100 | 100 | CD | 1.00E-04 | 0.974 | 0.349 | 1.000 | 0.003 | 109.950 |
| MultinomialLRT | 100 | 100 | CD | 0.001    | 0.945 | 0.420 | 0.875 | 0.010 | 106.550 |

|                |     |     |    |          |       |       |       |       |         |
|----------------|-----|-----|----|----------|-------|-------|-------|-------|---------|
| MultinomialLRT | 100 | 100 | CD | 0.01     | 0.802 | 0.522 | 0.911 | 0.037 | 109.450 |
| MultinomialLRT | 100 | 100 | CD | 0.03     | 0.711 | 0.580 | 0.704 | 0.058 | 118.750 |
| MultinomialLRT | 100 | 100 | CD | 0.05     | 0.647 | 0.612 | 0.699 | 0.080 | 127.750 |
| MultinomialLRT | 100 | 100 | CD | 0.08     | 0.572 | 0.633 | 0.608 | 0.102 | 144.350 |
| MultinomialLRT | 100 | 300 | CD | 1.00E-04 | 0.987 | 0.667 | 0.906 | 0.032 | 104.900 |
| MultinomialLRT | 100 | 300 | CD | 0.001    | 0.960 | 0.731 | 0.930 | 0.064 | 98.850  |
| MultinomialLRT | 100 | 300 | CD | 0.01     | 0.858 | 0.799 | 0.979 | 0.133 | 100.750 |
| MultinomialLRT | 100 | 300 | CD | 0.03     | 0.770 | 0.828 | 0.910 | 0.201 | 110.300 |
| MultinomialLRT | 100 | 300 | CD | 0.05     | 0.711 | 0.845 | 0.836 | 0.239 | 121.350 |
| MultinomialLRT | 100 | 300 | CD | 0.08     | 0.644 | 0.860 | 0.789 | 0.283 | 139.650 |
| MultinomialLRT | 100 | 500 | CD | 1.00E-04 | 0.993 | 0.724 | 0.977 | 0.110 | 87.100  |
| MultinomialLRT | 100 | 500 | CD | 0.001    | 0.976 | 0.779 | 0.985 | 0.170 | 80.400  |
| MultinomialLRT | 100 | 500 | CD | 0.01     | 0.916 | 0.837 | 0.982 | 0.283 | 75.200  |
| MultinomialLRT | 100 | 500 | CD | 0.03     | 0.816 | 0.875 | 0.967 | 0.359 | 84.100  |
| MultinomialLRT | 100 | 500 | CD | 0.05     | 0.758 | 0.884 | 0.928 | 0.390 | 94.000  |
| MultinomialLRT | 100 | 500 | CD | 0.08     | 0.683 | 0.897 | 0.888 | 0.435 | 110.900 |
| CondGaussLRT   | 100 | 100 | CD | 1.00E-04 | 0.978 | 0.115 | 1.000 | 0.001 | 124.800 |
| CondGaussLRT   | 100 | 100 | CD | 0.001    | 0.936 | 0.101 | 1.000 | 0.001 | 126.200 |
| CondGaussLRT   | 100 | 100 | CD | 0.01     | 0.963 | 0.077 | 0.958 | 0.008 | 126.250 |
| CondGaussLRT   | 100 | 100 | CD | 0.03     | 0.997 | 0.076 | 0.938 | 0.008 | 125.900 |
| CondGaussLRT   | 100 | 100 | CD | 0.05     | 0.994 | 0.080 | 0.938 | 0.008 | 125.800 |
| CondGaussLRT   | 100 | 100 | CD | 0.08     | 0.988 | 0.088 | 0.625 | 0.008 | 125.350 |
| CondGaussLRT   | 100 | 300 | CD | 1.00E-04 | 1.000 | 0.423 | 0.875 | 0.008 | 126.300 |
| CondGaussLRT   | 100 | 300 | CD | 0.001    | 0.982 | 0.432 | 0.933 | 0.019 | 126.400 |
| CondGaussLRT   | 100 | 300 | CD | 0.01     | 0.968 | 0.431 | 0.974 | 0.023 | 127.450 |
| CondGaussLRT   | 100 | 300 | CD | 0.03     | 0.962 | 0.413 | 0.873 | 0.038 | 127.700 |
| CondGaussLRT   | 100 | 300 | CD | 0.05     | 0.955 | 0.402 | 0.907 | 0.039 | 128.650 |
| CondGaussLRT   | 100 | 300 | CD | 0.08     | 0.938 | 0.374 | 0.967 | 0.049 | 131.100 |
| CondGaussLRT   | 100 | 500 | CD | 1.00E-04 | 1.000 | 0.453 | 0.894 | 0.029 | 113.250 |
| CondGaussLRT   | 100 | 500 | CD | 0.001    | 0.999 | 0.474 | 0.976 | 0.051 | 110.400 |
| CondGaussLRT   | 100 | 500 | CD | 0.01     | 0.979 | 0.478 | 1.000 | 0.068 | 110.250 |
| CondGaussLRT   | 100 | 500 | CD | 0.03     | 0.969 | 0.475 | 0.979 | 0.082 | 110.550 |
| CondGaussLRT   | 100 | 500 | CD | 0.05     | 0.956 | 0.471 | 0.945 | 0.097 | 110.800 |
| CondGaussLRT   | 100 | 500 | CD | 0.08     | 0.954 | 0.459 | 0.926 | 0.101 | 111.500 |
| FisherZ        | 100 | 100 | DD | 1.00E-04 | 0.891 | 0.073 | 1.000 | 0.002 | 62.600  |
| FisherZ        | 100 | 100 | DD | 0.001    | 0.785 | 0.123 | 0.667 | 0.002 | 62.200  |
| FisherZ        | 100 | 100 | DD | 0.01     | 0.477 | 0.170 | 0.917 | 0.006 | 69.300  |
| FisherZ        | 100 | 100 | DD | 0.03     | 0.375 | 0.220 | 0.517 | 0.010 | 79.150  |
| FisherZ        | 100 | 100 | DD | 0.05     | 0.327 | 0.252 | 0.417 | 0.018 | 88.250  |
| FisherZ        | 100 | 100 | DD | 0.08     | 0.261 | 0.276 | 0.221 | 0.023 | 104.500 |
| FisherZ        | 100 | 300 | DD | 1.00E-04 | 0.957 | 0.215 | NaN   | 0.000 | 65.650  |
| FisherZ        | 100 | 300 | DD | 0.001    | 0.909 | 0.261 | 0.667 | 0.002 | 64.700  |
| FisherZ        | 100 | 300 | DD | 0.01     | 0.676 | 0.343 | 0.757 | 0.021 | 69.500  |
| FisherZ        | 100 | 300 | DD | 0.03     | 0.489 | 0.399 | 0.451 | 0.031 | 82.650  |
| FisherZ        | 100 | 300 | DD | 0.05     | 0.395 | 0.427 | 0.370 | 0.043 | 96.300  |

## EVALUATION OF CAUSAL STRUCTURE LEARNING

|                |     |     |    |          |       |       |       |       |         |
|----------------|-----|-----|----|----------|-------|-------|-------|-------|---------|
| FisherZ        | 100 | 300 | DD | 0.08     | 0.321 | 0.448 | 0.288 | 0.062 | 115.150 |
| FisherZ        | 100 | 500 | DD | 1.00E-04 | 0.938 | 0.257 | 1.000 | 0.003 | 64.450  |
| FisherZ        | 100 | 500 | DD | 0.001    | 0.884 | 0.318 | 0.800 | 0.009 | 63.550  |
| FisherZ        | 100 | 500 | DD | 0.01     | 0.711 | 0.437 | 0.660 | 0.026 | 67.750  |
| FisherZ        | 100 | 500 | DD | 0.03     | 0.562 | 0.511 | 0.569 | 0.054 | 79.850  |
| FisherZ        | 100 | 500 | DD | 0.05     | 0.459 | 0.538 | 0.541 | 0.081 | 93.450  |
| FisherZ        | 100 | 500 | DD | 0.08     | 0.379 | 0.568 | 0.468 | 0.106 | 113.300 |
| ChiSquare      | 100 | 100 | DD | 1.00E-04 | 0.969 | 0.241 | NaN   | 0.000 | 58.250  |
| ChiSquare      | 100 | 100 | DD | 0.001    | 0.970 | 0.310 | NaN   | 0.000 | 56.550  |
| ChiSquare      | 100 | 100 | DD | 0.01     | 0.968 | 0.383 | 0.000 | 0.000 | 54.200  |
| ChiSquare      | 100 | 100 | DD | 0.03     | 0.957 | 0.426 | NaN   | 0.000 | 53.050  |
| ChiSquare      | 100 | 100 | DD | 0.05     | 0.951 | 0.439 | NaN   | 0.000 | 52.550  |
| ChiSquare      | 100 | 100 | DD | 0.08     | 0.941 | 0.478 | 0.750 | 0.007 | 51.450  |
| ChiSquare      | 100 | 300 | DD | 1.00E-04 | 0.976 | 0.486 | NaN   | 0.000 | 57.250  |
| ChiSquare      | 100 | 300 | DD | 0.001    | 0.981 | 0.543 | NaN   | 0.000 | 55.300  |
| ChiSquare      | 100 | 300 | DD | 0.01     | 0.945 | 0.608 | 1.000 | 0.002 | 54.100  |
| ChiSquare      | 100 | 300 | DD | 0.03     | 0.934 | 0.644 | 0.767 | 0.008 | 53.200  |
| ChiSquare      | 100 | 300 | DD | 0.05     | 0.921 | 0.660 | 0.875 | 0.014 | 52.950  |
| ChiSquare      | 100 | 300 | DD | 0.08     | 0.924 | 0.692 | 0.825 | 0.025 | 51.750  |
| ChiSquare      | 100 | 500 | DD | 1.00E-04 | 0.988 | 0.584 | NaN   | 0.000 | 52.300  |
| ChiSquare      | 100 | 500 | DD | 0.001    | 0.984 | 0.635 | 1.000 | 0.001 | 50.750  |
| ChiSquare      | 100 | 500 | DD | 0.01     | 0.975 | 0.712 | 1.000 | 0.005 | 48.050  |
| ChiSquare      | 100 | 500 | DD | 0.03     | 0.973 | 0.748 | 0.778 | 0.012 | 46.950  |
| ChiSquare      | 100 | 500 | DD | 0.05     | 0.963 | 0.777 | 0.667 | 0.024 | 46.400  |
| ChiSquare      | 100 | 500 | DD | 0.08     | 0.955 | 0.803 | 0.710 | 0.041 | 45.550  |
| MultinomialLRT | 100 | 100 | DD | 1.00E-04 | 0.957 | 0.456 | 0.750 | 0.006 | 51.900  |
| MultinomialLRT | 100 | 100 | DD | 0.001    | 0.900 | 0.535 | 0.700 | 0.013 | 51.000  |
| MultinomialLRT | 100 | 100 | DD | 0.01     | 0.734 | 0.627 | 0.777 | 0.043 | 57.300  |
| MultinomialLRT | 100 | 100 | DD | 0.03     | 0.602 | 0.676 | 0.544 | 0.070 | 68.750  |
| MultinomialLRT | 100 | 100 | DD | 0.05     | 0.517 | 0.696 | 0.520 | 0.092 | 80.350  |
| MultinomialLRT | 100 | 100 | DD | 0.08     | 0.449 | 0.719 | 0.392 | 0.126 | 93.000  |
| MultinomialLRT | 100 | 300 | DD | 1.00E-04 | 0.989 | 0.680 | 1.000 | 0.021 | 49.550  |
| MultinomialLRT | 100 | 300 | DD | 0.001    | 0.937 | 0.742 | 0.974 | 0.056 | 47.750  |
| MultinomialLRT | 100 | 300 | DD | 0.01     | 0.797 | 0.805 | 0.915 | 0.114 | 51.650  |
| MultinomialLRT | 100 | 300 | DD | 0.03     | 0.671 | 0.837 | 0.803 | 0.161 | 62.400  |
| MultinomialLRT | 100 | 300 | DD | 0.05     | 0.596 | 0.842 | 0.711 | 0.198 | 72.650  |
| MultinomialLRT | 100 | 300 | DD | 0.08     | 0.518 | 0.858 | 0.638 | 0.241 | 87.700  |
| MultinomialLRT | 100 | 500 | DD | 1.00E-04 | 0.997 | 0.831 | 0.990 | 0.116 | 38.650  |
| MultinomialLRT | 100 | 500 | DD | 0.001    | 0.966 | 0.874 | 0.993 | 0.186 | 36.150  |
| MultinomialLRT | 100 | 500 | DD | 0.01     | 0.862 | 0.913 | 0.987 | 0.278 | 38.950  |
| MultinomialLRT | 100 | 500 | DD | 0.03     | 0.727 | 0.928 | 0.931 | 0.352 | 50.350  |
| MultinomialLRT | 100 | 500 | DD | 0.05     | 0.638 | 0.936 | 0.844 | 0.397 | 61.800  |
| MultinomialLRT | 100 | 500 | DD | 0.08     | 0.545 | 0.939 | 0.732 | 0.461 | 78.650  |
| CondGaussLRT   | 100 | 100 | DD | 1.00E-04 | 0.992 | 0.161 | NaN   | 0.000 | 60.600  |
| CondGaussLRT   | 100 | 100 | DD | 0.001    | 1.000 | 0.196 | 0.667 | 0.002 | 59.300  |

|              |     |     |     |          |       |       |       |       |         |
|--------------|-----|-----|-----|----------|-------|-------|-------|-------|---------|
| CondGaussLRT | 100 | 100 | DD  | 0.01     | 0.990 | 0.220 | 0.750 | 0.004 | 58.550  |
| CondGaussLRT | 100 | 100 | DD  | 0.03     | 0.995 | 0.234 | 0.800 | 0.005 | 57.900  |
| CondGaussLRT | 100 | 100 | DD  | 0.05     | 1.000 | 0.239 | 0.800 | 0.005 | 57.600  |
| CondGaussLRT | 100 | 100 | DD  | 0.08     | 0.996 | 0.253 | 0.800 | 0.005 | 57.250  |
| CondGaussLRT | 100 | 300 | DD  | 1.00E-04 | 1.000 | 0.337 | NaN   | 0.000 | 62.150  |
| CondGaussLRT | 100 | 300 | DD  | 0.001    | 0.992 | 0.348 | NaN   | 0.000 | 62.050  |
| CondGaussLRT | 100 | 300 | DD  | 0.01     | 0.983 | 0.360 | 1.000 | 0.002 | 61.950  |
| CondGaussLRT | 100 | 300 | DD  | 0.03     | 1.000 | 0.354 | 1.000 | 0.002 | 61.950  |
| CondGaussLRT | 100 | 300 | DD  | 0.05     | 1.000 | 0.353 | 1.000 | 0.002 | 61.950  |
| CondGaussLRT | 100 | 300 | DD  | 0.08     | 1.000 | 0.347 | NaN   | 0.000 | 62.200  |
| CondGaussLRT | 100 | 500 | DD  | 1.00E-04 | 1.000 | 0.448 | 1.000 | 0.002 | 57.000  |
| CondGaussLRT | 100 | 500 | DD  | 0.001    | 1.000 | 0.458 | 1.000 | 0.006 | 56.550  |
| CondGaussLRT | 100 | 500 | DD  | 0.01     | 0.997 | 0.451 | 1.000 | 0.013 | 56.450  |
| CondGaussLRT | 100 | 500 | DD  | 0.03     | 0.986 | 0.435 | 1.000 | 0.020 | 56.800  |
| CondGaussLRT | 100 | 500 | DD  | 0.05     | 0.982 | 0.424 | 0.900 | 0.022 | 57.150  |
| CondGaussLRT | 100 | 500 | DD  | 0.08     | 0.985 | 0.410 | 0.900 | 0.022 | 57.650  |
| FisherZ      | 100 | 100 | All | 1.00E-04 | 0.978 | 0.239 | 0.977 | 0.014 | 230.250 |
| FisherZ      | 100 | 100 | All | 0.001    | 0.940 | 0.289 | 0.961 | 0.022 | 225.550 |
| FisherZ      | 100 | 100 | All | 0.01     | 0.766 | 0.356 | 0.977 | 0.049 | 234.750 |
| FisherZ      | 100 | 100 | All | 0.03     | 0.636 | 0.403 | 0.852 | 0.070 | 255.900 |
| FisherZ      | 100 | 100 | All | 0.05     | 0.552 | 0.431 | 0.758 | 0.087 | 280.950 |
| FisherZ      | 100 | 100 | All | 0.08     | 0.465 | 0.458 | 0.642 | 0.111 | 321.000 |
| FisherZ      | 100 | 300 | All | 1.00E-04 | 0.979 | 0.439 | 0.969 | 0.058 | 228.150 |
| FisherZ      | 100 | 300 | All | 0.001    | 0.956 | 0.486 | 0.978 | 0.088 | 218.850 |
| FisherZ      | 100 | 300 | All | 0.01     | 0.833 | 0.544 | 0.934 | 0.120 | 225.500 |
| FisherZ      | 100 | 300 | All | 0.03     | 0.695 | 0.587 | 0.776 | 0.155 | 253.950 |
| FisherZ      | 100 | 300 | All | 0.05     | 0.607 | 0.610 | 0.751 | 0.174 | 287.900 |
| FisherZ      | 100 | 300 | All | 0.08     | 0.522 | 0.626 | 0.673 | 0.192 | 337.450 |
| FisherZ      | 100 | 500 | All | 1.00E-04 | 0.968 | 0.484 | 0.978 | 0.126 | 210.300 |
| FisherZ      | 100 | 500 | All | 0.001    | 0.946 | 0.534 | 0.970 | 0.154 | 203.100 |
| FisherZ      | 100 | 500 | All | 0.01     | 0.850 | 0.603 | 0.926 | 0.195 | 208.750 |
| FisherZ      | 100 | 500 | All | 0.03     | 0.727 | 0.642 | 0.859 | 0.228 | 237.800 |
| FisherZ      | 100 | 500 | All | 0.05     | 0.644 | 0.663 | 0.829 | 0.257 | 266.800 |
| FisherZ      | 100 | 500 | All | 0.08     | 0.553 | 0.681 | 0.741 | 0.282 | 316.950 |
| ChiSquare    | 100 | 100 | All | 1.00E-04 | 0.984 | 0.168 | NaN   | 0.000 | 241.700 |
| ChiSquare    | 100 | 100 | All | 0.001    | 0.966 | 0.210 | NaN   | 0.000 | 237.250 |
| ChiSquare    | 100 | 100 | All | 0.01     | 0.947 | 0.267 | 0.500 | 0.000 | 231.450 |
| ChiSquare    | 100 | 100 | All | 0.03     | 0.952 | 0.320 | 0.750 | 0.001 | 225.300 |
| ChiSquare    | 100 | 100 | All | 0.05     | 0.955 | 0.339 | 0.625 | 0.002 | 222.900 |
| ChiSquare    | 100 | 100 | All | 0.08     | 0.940 | 0.366 | 0.688 | 0.005 | 220.200 |
| ChiSquare    | 100 | 300 | All | 1.00E-04 | 0.986 | 0.421 | 1.000 | 0.000 | 241.000 |
| ChiSquare    | 100 | 300 | All | 0.001    | 0.984 | 0.466 | 1.000 | 0.000 | 234.750 |
| ChiSquare    | 100 | 300 | All | 0.01     | 0.965 | 0.534 | 1.000 | 0.006 | 226.650 |
| ChiSquare    | 100 | 300 | All | 0.03     | 0.959 | 0.578 | 0.935 | 0.015 | 220.400 |
| ChiSquare    | 100 | 300 | All | 0.05     | 0.951 | 0.598 | 0.922 | 0.021 | 218.200 |

## EVALUATION OF CAUSAL STRUCTURE LEARNING

|                |     |     |     |          |       |       |       |       |         |
|----------------|-----|-----|-----|----------|-------|-------|-------|-------|---------|
| ChiSquare      | 100 | 300 | All | 0.08     | 0.952 | 0.622 | 0.899 | 0.037 | 213.100 |
| ChiSquare      | 100 | 500 | All | 1.00E-04 | 0.990 | 0.510 | 1.000 | 0.006 | 221.000 |
| ChiSquare      | 100 | 500 | All | 0.001    | 0.988 | 0.559 | 1.000 | 0.012 | 214.000 |
| ChiSquare      | 100 | 500 | All | 0.01     | 0.976 | 0.624 | 0.914 | 0.031 | 204.000 |
| ChiSquare      | 100 | 500 | All | 0.03     | 0.967 | 0.662 | 0.904 | 0.043 | 199.050 |
| ChiSquare      | 100 | 500 | All | 0.05     | 0.955 | 0.687 | 0.887 | 0.060 | 196.400 |
| ChiSquare      | 100 | 500 | All | 0.08     | 0.948 | 0.706 | 0.873 | 0.077 | 192.950 |
| MultinomialLRT | 100 | 100 | All | 1.00E-04 | 0.977 | 0.434 | 0.981 | 0.015 | 208.000 |
| MultinomialLRT | 100 | 100 | All | 0.001    | 0.950 | 0.507 | 0.938 | 0.028 | 199.800 |
| MultinomialLRT | 100 | 100 | All | 0.01     | 0.817 | 0.596 | 0.934 | 0.063 | 207.200 |
| MultinomialLRT | 100 | 100 | All | 0.03     | 0.719 | 0.649 | 0.786 | 0.096 | 226.800 |
| MultinomialLRT | 100 | 100 | All | 0.05     | 0.650 | 0.679 | 0.750 | 0.124 | 247.550 |
| MultinomialLRT | 100 | 100 | All | 0.08     | 0.575 | 0.697 | 0.625 | 0.150 | 281.350 |
| MultinomialLRT | 100 | 300 | All | 1.00E-04 | 0.990 | 0.697 | 0.945 | 0.067 | 190.450 |
| MultinomialLRT | 100 | 300 | All | 0.001    | 0.960 | 0.757 | 0.956 | 0.110 | 178.450 |
| MultinomialLRT | 100 | 300 | All | 0.01     | 0.863 | 0.818 | 0.969 | 0.184 | 180.200 |
| MultinomialLRT | 100 | 300 | All | 0.03     | 0.765 | 0.846 | 0.891 | 0.245 | 201.350 |
| MultinomialLRT | 100 | 300 | All | 0.05     | 0.705 | 0.857 | 0.824 | 0.282 | 224.250 |
| MultinomialLRT | 100 | 300 | All | 0.08     | 0.635 | 0.870 | 0.776 | 0.325 | 261.050 |
| MultinomialLRT | 100 | 500 | All | 1.00E-04 | 0.995 | 0.790 | 0.983 | 0.202 | 151.250 |
| MultinomialLRT | 100 | 500 | All | 0.001    | 0.979 | 0.834 | 0.985 | 0.265 | 138.950 |
| MultinomialLRT | 100 | 500 | All | 0.01     | 0.920 | 0.880 | 0.984 | 0.360 | 133.600 |
| MultinomialLRT | 100 | 500 | All | 0.03     | 0.822 | 0.905 | 0.960 | 0.427 | 154.500 |
| MultinomialLRT | 100 | 500 | All | 0.05     | 0.760 | 0.912 | 0.919 | 0.456 | 177.000 |
| MultinomialLRT | 100 | 500 | All | 0.08     | 0.678 | 0.921 | 0.863 | 0.500 | 214.950 |
| CondGaussLRT   | 100 | 100 | All | 1.00E-04 | 0.992 | 0.234 | 1.000 | 0.009 | 232.800 |
| CondGaussLRT   | 100 | 100 | All | 0.001    | 0.982 | 0.252 | 0.975 | 0.013 | 230.350 |
| CondGaussLRT   | 100 | 100 | All | 0.01     | 0.978 | 0.261 | 0.957 | 0.036 | 225.750 |
| CondGaussLRT   | 100 | 100 | All | 0.03     | 0.988 | 0.273 | 0.973 | 0.045 | 222.150 |
| CondGaussLRT   | 100 | 100 | All | 0.05     | 0.970 | 0.284 | 0.974 | 0.052 | 220.800 |
| CondGaussLRT   | 100 | 100 | All | 0.08     | 0.931 | 0.294 | 0.979 | 0.058 | 221.150 |
| CondGaussLRT   | 100 | 300 | All | 1.00E-04 | 0.999 | 0.474 | 0.938 | 0.033 | 228.900 |
| CondGaussLRT   | 100 | 300 | All | 0.001    | 0.987 | 0.491 | 0.961 | 0.049 | 225.950 |
| CondGaussLRT   | 100 | 300 | All | 0.01     | 0.973 | 0.502 | 0.965 | 0.065 | 223.550 |
| CondGaussLRT   | 100 | 300 | All | 0.03     | 0.977 | 0.494 | 0.952 | 0.082 | 221.950 |
| CondGaussLRT   | 100 | 300 | All | 0.05     | 0.970 | 0.490 | 0.964 | 0.087 | 221.850 |
| CondGaussLRT   | 100 | 300 | All | 0.08     | 0.951 | 0.477 | 0.975 | 0.098 | 224.400 |
| CondGaussLRT   | 100 | 500 | All | 1.00E-04 | 0.998 | 0.551 | 0.977 | 0.104 | 201.400 |
| CondGaussLRT   | 100 | 500 | All | 0.001    | 0.998 | 0.571 | 0.986 | 0.132 | 194.850 |
| CondGaussLRT   | 100 | 500 | All | 0.01     | 0.988 | 0.577 | 0.996 | 0.152 | 192.450 |
| CondGaussLRT   | 100 | 500 | All | 0.03     | 0.980 | 0.577 | 0.990 | 0.172 | 191.100 |
| CondGaussLRT   | 100 | 500 | All | 0.05     | 0.971 | 0.576 | 0.984 | 0.185 | 190.850 |
| CondGaussLRT   | 100 | 500 | All | 0.08     | 0.966 | 0.568 | 0.977 | 0.190 | 192.150 |

Table 4: All data for comparison of independence tests split by edge type with 50 and 100 variable, 1.5 density graphs generated using the Lee and Hastie method. This table shows the average result for the parameter value chosen by StARS for each simulation setting.

| Algorithm      | Num Vars | SS  | Type | AP    | AR    | AHP   | AHR   | SHD     |
|----------------|----------|-----|------|-------|-------|-------|-------|---------|
| FisherZ        | 50       | 100 | CC   | 0.750 | 0.845 | 0.884 | 0.298 | 22.350  |
| FisherZ        | 50       | 300 | CC   | 0.758 | 0.919 | 0.833 | 0.438 | 20.250  |
| FisherZ        | 50       | 500 | CC   | 0.749 | 0.940 | 0.836 | 0.569 | 19.050  |
| ChiSquare      | 50       | 100 | CC   | 0.944 | 0.503 | 0.833 | 0.010 | 26.450  |
| ChiSquare      | 50       | 300 | CC   | 0.920 | 0.678 | 0.775 | 0.044 | 25.700  |
| ChiSquare      | 50       | 500 | CC   | 0.911 | 0.796 | 0.950 | 0.167 | 22.050  |
| MultinomialLRT | 50       | 100 | CC   | 0.851 | 0.851 | 0.860 | 0.311 | 18.550  |
| MultinomialLRT | 50       | 300 | CC   | 0.840 | 0.904 | 0.922 | 0.479 | 16.350  |
| MultinomialLRT | 50       | 500 | CC   | 0.871 | 0.936 | 0.957 | 0.642 | 11.950  |
| CondGaussLRT   | 50       | 100 | CC   | 0.952 | 0.758 | 0.967 | 0.148 | 19.000  |
| CondGaussLRT   | 50       | 300 | CC   | 0.956 | 0.847 | 0.940 | 0.279 | 17.500  |
| CondGaussLRT   | 50       | 500 | CC   | 0.957 | 0.910 | 0.973 | 0.465 | 13.050  |
| FisherZ        | 50       | 100 | CD   | 0.562 | 0.385 | 0.738 | 0.059 | 74.100  |
| FisherZ        | 50       | 300 | CD   | 0.622 | 0.547 | 0.722 | 0.141 | 75.600  |
| FisherZ        | 50       | 500 | CD   | 0.628 | 0.611 | 0.669 | 0.200 | 70.650  |
| ChiSquare      | 50       | 100 | CD   | 0.930 | 0.315 | 0.000 | 0.000 | 60.500  |
| ChiSquare      | 50       | 300 | CD   | 0.959 | 0.529 | 0.654 | 0.033 | 58.350  |
| ChiSquare      | 50       | 500 | CD   | 0.967 | 0.641 | 0.792 | 0.026 | 50.100  |
| MultinomialLRT | 50       | 100 | CD   | 0.668 | 0.686 | 0.615 | 0.090 | 65.350  |
| MultinomialLRT | 50       | 300 | CD   | 0.756 | 0.811 | 0.809 | 0.262 | 54.650  |
| MultinomialLRT | 50       | 500 | CD   | 0.752 | 0.892 | 0.886 | 0.391 | 45.850  |
| CondGaussLRT   | 50       | 100 | CD   | 0.931 | 0.163 | 1.000 | 0.005 | 65.000  |
| CondGaussLRT   | 50       | 300 | CD   | 0.935 | 0.378 | 0.950 | 0.048 | 65.200  |
| CondGaussLRT   | 50       | 500 | CD   | 0.942 | 0.489 | 0.932 | 0.055 | 55.750  |
| FisherZ        | 50       | 100 | DD   | 0.405 | 0.319 | 0.561 | 0.070 | 39.350  |
| FisherZ        | 50       | 300 | DD   | 0.475 | 0.447 | 0.363 | 0.050 | 47.750  |
| FisherZ        | 50       | 500 | DD   | 0.566 | 0.602 | 0.531 | 0.117 | 39.900  |
| ChiSquare      | 50       | 100 | DD   | 0.911 | 0.491 | 0.000 | 0.000 | 26.100  |
| ChiSquare      | 50       | 300 | DD   | 0.954 | 0.703 | 0.833 | 0.033 | 27.000  |
| ChiSquare      | 50       | 500 | DD   | 0.976 | 0.847 | 0.622 | 0.022 | 21.900  |
| MultinomialLRT | 50       | 100 | DD   | 0.523 | 0.690 | 0.496 | 0.138 | 37.600  |
| MultinomialLRT | 50       | 300 | DD   | 0.680 | 0.911 | 0.762 | 0.288 | 31.100  |
| MultinomialLRT | 50       | 500 | DD   | 0.666 | 0.970 | 0.850 | 0.377 | 27.700  |
| CondGaussLRT   | 50       | 100 | DD   | 1.000 | 0.249 | 1.000 | 0.011 | 28.100  |
| CondGaussLRT   | 50       | 300 | DD   | 0.973 | 0.336 | NaN   | 0.000 | 34.450  |
| CondGaussLRT   | 50       | 500 | DD   | 0.994 | 0.414 | 0.500 | 0.002 | 29.900  |
| FisherZ        | 50       | 100 | All  | 0.593 | 0.490 | 0.787 | 0.129 | 135.800 |
| FisherZ        | 50       | 300 | All  | 0.628 | 0.607 | 0.727 | 0.190 | 143.600 |
| FisherZ        | 50       | 500 | All  | 0.645 | 0.687 | 0.737 | 0.264 | 129.600 |
| ChiSquare      | 50       | 100 | All  | 0.928 | 0.399 | 0.500 | 0.002 | 113.050 |

## EVALUATION OF CAUSAL STRUCTURE LEARNING

|                |     |     |     |       |       |       |       |         |
|----------------|-----|-----|-----|-------|-------|-------|-------|---------|
| ChiSquare      | 50  | 300 | All | 0.944 | 0.606 | 0.717 | 0.036 | 111.050 |
| ChiSquare      | 50  | 500 | All | 0.955 | 0.729 | 0.883 | 0.055 | 94.050  |
| MultinomialLRT | 50  | 100 | All | 0.667 | 0.721 | 0.674 | 0.161 | 121.500 |
| MultinomialLRT | 50  | 300 | All | 0.751 | 0.858 | 0.821 | 0.317 | 102.100 |
| MultinomialLRT | 50  | 500 | All | 0.750 | 0.923 | 0.904 | 0.445 | 85.500  |
| CondGaussLRT   | 50  | 100 | All | 0.955 | 0.329 | 0.969 | 0.042 | 112.100 |
| CondGaussLRT   | 50  | 300 | All | 0.949 | 0.471 | 0.925 | 0.093 | 117.150 |
| CondGaussLRT   | 50  | 500 | All | 0.949 | 0.571 | 0.953 | 0.137 | 98.700  |
| FisherZ        | 100 | 100 | CC  | 0.697 | 0.827 | 0.816 | 0.302 | 49.800  |
| FisherZ        | 100 | 300 | CC  | 0.688 | 0.932 | 0.767 | 0.469 | 45.250  |
| FisherZ        | 100 | 500 | CC  | 0.744 | 0.958 | 0.874 | 0.600 | 41.400  |
| ChiSquare      | 100 | 100 | CC  | 0.933 | 0.469 | 0.625 | 0.007 | 52.600  |
| ChiSquare      | 100 | 300 | CC  | 0.945 | 0.671 | 0.910 | 0.062 | 47.400  |
| ChiSquare      | 100 | 500 | CC  | 0.926 | 0.765 | 0.966 | 0.145 | 46.150  |
| MultinomialLRT | 100 | 100 | CC  | 0.783 | 0.813 | 0.882 | 0.263 | 44.000  |
| MultinomialLRT | 100 | 300 | CC  | 0.789 | 0.915 | 0.850 | 0.500 | 33.700  |
| MultinomialLRT | 100 | 500 | CC  | 0.872 | 0.952 | 0.939 | 0.665 | 25.400  |
| CondGaussLRT   | 100 | 100 | CC  | 0.968 | 0.712 | 0.992 | 0.121 | 39.750  |
| CondGaussLRT   | 100 | 300 | CC  | 0.944 | 0.853 | 0.976 | 0.310 | 31.300  |
| CondGaussLRT   | 100 | 500 | CC  | 0.976 | 0.928 | 0.993 | 0.504 | 23.600  |
| FisherZ        | 100 | 100 | CD  | 0.435 | 0.370 | 0.485 | 0.056 | 166.700 |
| FisherZ        | 100 | 300 | CD  | 0.536 | 0.575 | 0.604 | 0.128 | 177.050 |
| FisherZ        | 100 | 500 | CD  | 0.549 | 0.596 | 0.687 | 0.201 | 162.250 |
| ChiSquare      | 100 | 100 | CD  | 0.943 | 0.261 | 1.000 | 0.003 | 116.150 |
| ChiSquare      | 100 | 300 | CD  | 0.970 | 0.564 | 0.908 | 0.032 | 114.100 |
| ChiSquare      | 100 | 500 | CD  | 0.962 | 0.632 | 0.855 | 0.064 | 101.300 |
| MultinomialLRT | 100 | 100 | CD  | 0.572 | 0.633 | 0.608 | 0.102 | 144.350 |
| MultinomialLRT | 100 | 300 | CD  | 0.644 | 0.860 | 0.794 | 0.286 | 139.500 |
| MultinomialLRT | 100 | 500 | CD  | 0.683 | 0.897 | 0.887 | 0.431 | 111.050 |
| CondGaussLRT   | 100 | 100 | CD  | 0.948 | 0.108 | 0.500 | 0.001 | 125.600 |
| CondGaussLRT   | 100 | 300 | CD  | 0.936 | 0.374 | 0.967 | 0.049 | 131.250 |
| CondGaussLRT   | 100 | 500 | CD  | 0.959 | 0.460 | 0.939 | 0.096 | 111.400 |
| FisherZ        | 100 | 100 | DD  | 0.261 | 0.276 | 0.221 | 0.023 | 104.500 |
| FisherZ        | 100 | 300 | DD  | 0.321 | 0.448 | 0.288 | 0.062 | 115.150 |
| FisherZ        | 100 | 500 | DD  | 0.379 | 0.568 | 0.468 | 0.106 | 113.300 |
| ChiSquare      | 100 | 100 | DD  | 0.941 | 0.478 | 0.750 | 0.007 | 51.450  |
| ChiSquare      | 100 | 300 | DD  | 0.919 | 0.692 | 0.825 | 0.025 | 51.850  |
| ChiSquare      | 100 | 500 | DD  | 0.957 | 0.800 | 0.736 | 0.042 | 45.500  |
| MultinomialLRT | 100 | 100 | DD  | 0.449 | 0.719 | 0.392 | 0.126 | 93.000  |
| MultinomialLRT | 100 | 300 | DD  | 0.518 | 0.858 | 0.619 | 0.246 | 87.500  |
| MultinomialLRT | 100 | 500 | DD  | 0.545 | 0.939 | 0.733 | 0.459 | 78.950  |
| CondGaussLRT   | 100 | 100 | DD  | 1.000 | 0.235 | 0.667 | 0.002 | 57.700  |
| CondGaussLRT   | 100 | 300 | DD  | 1.000 | 0.346 | NaN   | 0.000 | 62.250  |
| CondGaussLRT   | 100 | 500 | DD  | 0.985 | 0.406 | 0.900 | 0.021 | 57.850  |
| FisherZ        | 100 | 100 | All | 0.465 | 0.458 | 0.642 | 0.111 | 321.000 |

|                |     |     |     |       |       |       |       |         |
|----------------|-----|-----|-----|-------|-------|-------|-------|---------|
| FisherZ        | 100 | 300 | All | 0.522 | 0.626 | 0.673 | 0.192 | 337.450 |
| FisherZ        | 100 | 500 | All | 0.553 | 0.681 | 0.741 | 0.282 | 316.950 |
| ChiSquare      | 100 | 100 | All | 0.940 | 0.366 | 0.688 | 0.005 | 220.200 |
| ChiSquare      | 100 | 300 | All | 0.950 | 0.617 | 0.899 | 0.037 | 213.350 |
| ChiSquare      | 100 | 500 | All | 0.949 | 0.704 | 0.875 | 0.078 | 192.950 |
| MultinomialLRT | 100 | 100 | All | 0.575 | 0.697 | 0.625 | 0.150 | 281.350 |
| MultinomialLRT | 100 | 300 | All | 0.635 | 0.870 | 0.773 | 0.327 | 260.700 |
| MultinomialLRT | 100 | 500 | All | 0.678 | 0.921 | 0.860 | 0.497 | 215.400 |
| CondGaussLRT   | 100 | 100 | All | 0.963 | 0.288 | 0.968 | 0.031 | 223.050 |
| CondGaussLRT   | 100 | 300 | All | 0.950 | 0.476 | 0.975 | 0.097 | 224.800 |
| CondGaussLRT   | 100 | 500 | All | 0.970 | 0.566 | 0.982 | 0.184 | 192.850 |

Table 5: All data for comparison of independence tests split by edge type with 50 and 100 variable, 1.5 density graphs generated using the Conditional Gaussian method.

| Algorithm | Num Vars | SS  | Type | Parameter | AP    | AR    | AHP   | AHR   | SHD    |
|-----------|----------|-----|------|-----------|-------|-------|-------|-------|--------|
| FisherZ   | 50       | 100 | CC   | 1.00E-04  | 0.975 | 0.127 | NaN   | 0.000 | 43.550 |
| FisherZ   | 50       | 100 | CC   | 0.001     | 0.925 | 0.141 | 1.000 | 0.011 | 43.300 |
| FisherZ   | 50       | 100 | CC   | 0.01      | 0.736 | 0.172 | 1.000 | 0.017 | 44.400 |
| FisherZ   | 50       | 100 | CC   | 0.03      | 0.647 | 0.206 | 0.857 | 0.019 | 45.800 |
| FisherZ   | 50       | 100 | CC   | 0.05      | 0.522 | 0.221 | 0.750 | 0.026 | 49.050 |
| FisherZ   | 50       | 100 | CC   | 0.08      | 0.438 | 0.241 | 0.708 | 0.034 | 53.500 |
| FisherZ   | 50       | 300 | CC   | 1.00E-04  | 0.983 | 0.371 | 0.970 | 0.066 | 33.000 |
| FisherZ   | 50       | 300 | CC   | 0.001     | 0.970 | 0.432 | 0.875 | 0.085 | 32.050 |
| FisherZ   | 50       | 300 | CC   | 0.01      | 0.857 | 0.497 | 0.892 | 0.123 | 32.100 |
| FisherZ   | 50       | 300 | CC   | 0.03      | 0.754 | 0.536 | 0.872 | 0.140 | 34.300 |
| FisherZ   | 50       | 300 | CC   | 0.05      | 0.663 | 0.550 | 0.762 | 0.171 | 37.650 |
| FisherZ   | 50       | 300 | CC   | 0.08      | 0.593 | 0.575 | 0.703 | 0.173 | 41.800 |
| FisherZ   | 50       | 500 | CC   | 1.00E-04  | 0.996 | 0.501 | 0.978 | 0.116 | 28.100 |
| FisherZ   | 50       | 500 | CC   | 0.001     | 0.978 | 0.551 | 0.978 | 0.128 | 27.250 |
| FisherZ   | 50       | 500 | CC   | 0.01      | 0.886 | 0.598 | 0.926 | 0.144 | 27.950 |
| FisherZ   | 50       | 500 | CC   | 0.03      | 0.777 | 0.631 | 0.906 | 0.152 | 31.100 |
| FisherZ   | 50       | 500 | CC   | 0.05      | 0.708 | 0.651 | 0.840 | 0.154 | 33.650 |
| FisherZ   | 50       | 500 | CC   | 0.08      | 0.642 | 0.683 | 0.722 | 0.173 | 36.950 |
| ChiSquare | 50       | 100 | CC   | 1.00E-04  | 1.000 | 0.109 | NaN   | 0.000 | 43.600 |
| ChiSquare | 50       | 100 | CC   | 0.001     | 0.975 | 0.138 | NaN   | 0.000 | 42.950 |
| ChiSquare | 50       | 100 | CC   | 0.01      | 0.946 | 0.176 | 1.000 | 0.007 | 42.550 |
| ChiSquare | 50       | 100 | CC   | 0.03      | 0.952 | 0.184 | NaN   | 0.000 | 42.450 |
| ChiSquare | 50       | 100 | CC   | 0.05      | 0.876 | 0.187 | 1.000 | 0.001 | 42.950 |
| ChiSquare | 50       | 100 | CC   | 0.08      | 0.886 | 0.207 | 0.667 | 0.003 | 42.650 |
| ChiSquare | 50       | 300 | CC   | 1.00E-04  | 0.968 | 0.363 | 1.000 | 0.010 | 34.600 |
| ChiSquare | 50       | 300 | CC   | 0.001     | 0.946 | 0.394 | 1.000 | 0.008 | 34.050 |
| ChiSquare | 50       | 300 | CC   | 0.01      | 0.902 | 0.459 | 0.875 | 0.041 | 33.200 |
| ChiSquare | 50       | 300 | CC   | 0.03      | 0.899 | 0.494 | 0.879 | 0.041 | 32.800 |
| ChiSquare | 50       | 300 | CC   | 0.05      | 0.872 | 0.508 | 0.917 | 0.052 | 32.900 |



## EVALUATION OF CAUSAL STRUCTURE LEARNING

|                |    |     |    |          |       |       |       |       |        |
|----------------|----|-----|----|----------|-------|-------|-------|-------|--------|
| ChiSquare      | 50 | 300 | CC | 0.08     | 0.869 | 0.531 | 0.929 | 0.067 | 32.400 |
| ChiSquare      | 50 | 500 | CC | 1.00E-04 | 0.978 | 0.485 | 1.000 | 0.038 | 30.350 |
| ChiSquare      | 50 | 500 | CC | 0.001    | 0.965 | 0.552 | 1.000 | 0.058 | 29.200 |
| ChiSquare      | 50 | 500 | CC | 0.01     | 0.915 | 0.595 | 0.908 | 0.094 | 29.050 |
| ChiSquare      | 50 | 500 | CC | 0.03     | 0.892 | 0.622 | 0.927 | 0.105 | 29.150 |
| ChiSquare      | 50 | 500 | CC | 0.05     | 0.887 | 0.633 | 0.870 | 0.111 | 29.100 |
| ChiSquare      | 50 | 500 | CC | 0.08     | 0.873 | 0.642 | 0.804 | 0.129 | 29.150 |
| MultinomialLRT | 50 | 100 | CC | 1.00E-04 | 0.971 | 0.168 | 0.000 | 0.000 | 42.750 |
| MultinomialLRT | 50 | 100 | CC | 0.001    | 0.861 | 0.190 | 0.875 | 0.012 | 43.200 |
| MultinomialLRT | 50 | 100 | CC | 0.01     | 0.754 | 0.245 | 0.778 | 0.020 | 43.950 |
| MultinomialLRT | 50 | 100 | CC | 0.03     | 0.609 | 0.266 | 0.808 | 0.034 | 47.250 |
| MultinomialLRT | 50 | 100 | CC | 0.05     | 0.529 | 0.285 | 0.613 | 0.038 | 50.150 |
| MultinomialLRT | 50 | 100 | CC | 0.08     | 0.445 | 0.301 | 0.521 | 0.041 | 54.850 |
| MultinomialLRT | 50 | 300 | CC | 1.00E-04 | 0.965 | 0.416 | 0.889 | 0.064 | 32.450 |
| MultinomialLRT | 50 | 300 | CC | 0.001    | 0.936 | 0.457 | 0.833 | 0.085 | 31.900 |
| MultinomialLRT | 50 | 300 | CC | 0.01     | 0.829 | 0.533 | 0.845 | 0.132 | 32.550 |
| MultinomialLRT | 50 | 300 | CC | 0.03     | 0.738 | 0.563 | 0.772 | 0.147 | 35.300 |
| MultinomialLRT | 50 | 300 | CC | 0.05     | 0.652 | 0.577 | 0.642 | 0.165 | 39.000 |
| MultinomialLRT | 50 | 300 | CC | 0.08     | 0.588 | 0.605 | 0.594 | 0.192 | 43.050 |
| MultinomialLRT | 50 | 500 | CC | 1.00E-04 | 0.971 | 0.510 | 0.978 | 0.114 | 28.100 |
| MultinomialLRT | 50 | 500 | CC | 0.001    | 0.958 | 0.572 | 0.978 | 0.131 | 27.200 |
| MultinomialLRT | 50 | 500 | CC | 0.01     | 0.878 | 0.622 | 0.932 | 0.147 | 28.000 |
| MultinomialLRT | 50 | 500 | CC | 0.03     | 0.775 | 0.658 | 0.932 | 0.154 | 31.000 |
| MultinomialLRT | 50 | 500 | CC | 0.05     | 0.715 | 0.673 | 0.856 | 0.165 | 33.750 |
| MultinomialLRT | 50 | 500 | CC | 0.08     | 0.642 | 0.688 | 0.825 | 0.190 | 37.500 |
| CondGaussLRT   | 50 | 100 | CC | 1.00E-04 | 0.988 | 0.164 | NaN   | 0.000 | 42.700 |
| CondGaussLRT   | 50 | 100 | CC | 0.001    | 1.000 | 0.173 | 1.000 | 0.011 | 42.250 |
| CondGaussLRT   | 50 | 100 | CC | 0.01     | 0.854 | 0.194 | 1.000 | 0.019 | 42.950 |
| CondGaussLRT   | 50 | 100 | CC | 0.03     | 0.916 | 0.201 | 0.833 | 0.017 | 42.350 |
| CondGaussLRT   | 50 | 100 | CC | 0.05     | 0.896 | 0.213 | 1.000 | 0.017 | 42.350 |
| CondGaussLRT   | 50 | 100 | CC | 0.08     | 0.874 | 0.225 | 0.750 | 0.022 | 42.450 |
| CondGaussLRT   | 50 | 300 | CC | 1.00E-04 | 0.988 | 0.413 | 0.889 | 0.065 | 32.600 |
| CondGaussLRT   | 50 | 300 | CC | 0.001    | 0.996 | 0.457 | 0.867 | 0.087 | 31.300 |
| CondGaussLRT   | 50 | 300 | CC | 0.01     | 0.979 | 0.495 | 0.843 | 0.132 | 30.150 |
| CondGaussLRT   | 50 | 300 | CC | 0.03     | 0.954 | 0.530 | 0.824 | 0.141 | 29.750 |
| CondGaussLRT   | 50 | 300 | CC | 0.05     | 0.932 | 0.546 | 0.766 | 0.155 | 29.900 |
| CondGaussLRT   | 50 | 300 | CC | 0.08     | 0.907 | 0.549 | 0.822 | 0.167 | 30.250 |
| CondGaussLRT   | 50 | 500 | CC | 1.00E-04 | 0.996 | 0.499 | 0.958 | 0.142 | 27.600 |
| CondGaussLRT   | 50 | 500 | CC | 0.001    | 0.996 | 0.537 | 0.960 | 0.161 | 26.700 |
| CondGaussLRT   | 50 | 500 | CC | 0.01     | 0.970 | 0.596 | 0.925 | 0.198 | 25.550 |
| CondGaussLRT   | 50 | 500 | CC | 0.03     | 0.927 | 0.606 | 0.887 | 0.219 | 25.750 |
| CondGaussLRT   | 50 | 500 | CC | 0.05     | 0.923 | 0.614 | 0.929 | 0.220 | 25.900 |
| CondGaussLRT   | 50 | 500 | CC | 0.08     | 0.894 | 0.635 | 0.828 | 0.244 | 26.000 |
| FisherZ        | 50 | 100 | CD | 1.00E-04 | 0.971 | 0.097 | 0.333 | 0.002 | 91.550 |
| FisherZ        | 50 | 100 | CD | 0.001    | 0.918 | 0.120 | 0.571 | 0.006 | 91.000 |

|                |    |     |    |          |       |       |       |       |         |
|----------------|----|-----|----|----------|-------|-------|-------|-------|---------|
| FisherZ        | 50 | 100 | CD | 0.01     | 0.714 | 0.147 | 0.818 | 0.017 | 93.750  |
| FisherZ        | 50 | 100 | CD | 0.03     | 0.556 | 0.171 | 0.857 | 0.022 | 99.700  |
| FisherZ        | 50 | 100 | CD | 0.05     | 0.481 | 0.186 | 0.792 | 0.028 | 104.800 |
| FisherZ        | 50 | 100 | CD | 0.08     | 0.424 | 0.219 | 0.686 | 0.039 | 112.900 |
| FisherZ        | 50 | 300 | CD | 1.00E-04 | 0.992 | 0.122 | 0.833 | 0.010 | 83.300  |
| FisherZ        | 50 | 300 | CD | 0.001    | 0.967 | 0.146 | 0.833 | 0.013 | 82.400  |
| FisherZ        | 50 | 300 | CD | 0.01     | 0.660 | 0.173 | 0.829 | 0.020 | 86.700  |
| FisherZ        | 50 | 300 | CD | 0.03     | 0.475 | 0.191 | 0.590 | 0.021 | 95.800  |
| FisherZ        | 50 | 300 | CD | 0.05     | 0.399 | 0.202 | 0.450 | 0.027 | 102.900 |
| FisherZ        | 50 | 300 | CD | 0.08     | 0.325 | 0.218 | 0.444 | 0.036 | 114.550 |
| FisherZ        | 50 | 500 | CD | 1.00E-04 | 0.989 | 0.156 | 1.000 | 0.011 | 73.950  |
| FisherZ        | 50 | 500 | CD | 0.001    | 0.938 | 0.176 | 1.000 | 0.011 | 73.500  |
| FisherZ        | 50 | 500 | CD | 0.01     | 0.723 | 0.218 | 0.833 | 0.014 | 76.550  |
| FisherZ        | 50 | 500 | CD | 0.03     | 0.530 | 0.248 | 0.767 | 0.020 | 84.200  |
| FisherZ        | 50 | 500 | CD | 0.05     | 0.468 | 0.272 | 0.551 | 0.022 | 90.000  |
| FisherZ        | 50 | 500 | CD | 0.08     | 0.371 | 0.303 | 0.388 | 0.031 | 103.400 |
| ChiSquare      | 50 | 100 | CD | 1.00E-04 | 0.923 | 0.091 | NaN   | 0.000 | 91.750  |
| ChiSquare      | 50 | 100 | CD | 0.001    | 0.945 | 0.113 | NaN   | 0.000 | 91.100  |
| ChiSquare      | 50 | 100 | CD | 0.01     | 0.898 | 0.142 | NaN   | 0.000 | 90.600  |
| ChiSquare      | 50 | 100 | CD | 0.03     | 0.920 | 0.162 | 1.000 | 0.002 | 89.350  |
| ChiSquare      | 50 | 100 | CD | 0.05     | 0.884 | 0.169 | 1.000 | 0.003 | 89.550  |
| ChiSquare      | 50 | 100 | CD | 0.08     | 0.855 | 0.178 | 0.813 | 0.007 | 89.650  |
| ChiSquare      | 50 | 300 | CD | 1.00E-04 | 0.977 | 0.150 | 1.000 | 0.001 | 82.650  |
| ChiSquare      | 50 | 300 | CD | 0.001    | 0.971 | 0.185 | 1.000 | 0.001 | 81.600  |
| ChiSquare      | 50 | 300 | CD | 0.01     | 0.925 | 0.219 | 1.000 | 0.013 | 80.550  |
| ChiSquare      | 50 | 300 | CD | 0.03     | 0.930 | 0.254 | 0.972 | 0.027 | 79.000  |
| ChiSquare      | 50 | 300 | CD | 0.05     | 0.904 | 0.258 | 0.889 | 0.028 | 79.500  |
| ChiSquare      | 50 | 300 | CD | 0.08     | 0.857 | 0.282 | 0.827 | 0.036 | 79.700  |
| ChiSquare      | 50 | 500 | CD | 1.00E-04 | 0.987 | 0.213 | 1.000 | 0.027 | 72.050  |
| ChiSquare      | 50 | 500 | CD | 0.001    | 0.976 | 0.249 | 0.969 | 0.041 | 70.600  |
| ChiSquare      | 50 | 500 | CD | 0.01     | 0.938 | 0.272 | 0.963 | 0.054 | 70.100  |
| ChiSquare      | 50 | 500 | CD | 0.03     | 0.934 | 0.312 | 0.886 | 0.064 | 68.950  |
| ChiSquare      | 50 | 500 | CD | 0.05     | 0.919 | 0.324 | 0.872 | 0.075 | 68.350  |
| ChiSquare      | 50 | 500 | CD | 0.08     | 0.892 | 0.339 | 0.724 | 0.088 | 68.400  |
| MultinomialLRT | 50 | 100 | CD | 1.00E-04 | 0.925 | 0.136 | 0.250 | 0.002 | 90.500  |
| MultinomialLRT | 50 | 100 | CD | 0.001    | 0.843 | 0.158 | 0.571 | 0.006 | 90.950  |
| MultinomialLRT | 50 | 100 | CD | 0.01     | 0.699 | 0.196 | 0.705 | 0.014 | 93.950  |
| MultinomialLRT | 50 | 100 | CD | 0.03     | 0.574 | 0.220 | 0.733 | 0.024 | 99.800  |
| MultinomialLRT | 50 | 100 | CD | 0.05     | 0.494 | 0.235 | 0.604 | 0.028 | 106.350 |
| MultinomialLRT | 50 | 100 | CD | 0.08     | 0.434 | 0.261 | 0.528 | 0.043 | 114.150 |
| MultinomialLRT | 50 | 300 | CD | 1.00E-04 | 0.983 | 0.171 | 0.679 | 0.010 | 81.550  |
| MultinomialLRT | 50 | 300 | CD | 0.001    | 0.922 | 0.205 | 0.667 | 0.012 | 81.700  |
| MultinomialLRT | 50 | 300 | CD | 0.01     | 0.667 | 0.237 | 0.581 | 0.023 | 87.050  |
| MultinomialLRT | 50 | 300 | CD | 0.03     | 0.510 | 0.267 | 0.492 | 0.031 | 96.450  |
| MultinomialLRT | 50 | 300 | CD | 0.05     | 0.437 | 0.280 | 0.361 | 0.033 | 104.850 |

## EVALUATION OF CAUSAL STRUCTURE LEARNING

|                |    |     |    |          |       |       |       |       |         |
|----------------|----|-----|----|----------|-------|-------|-------|-------|---------|
| MultinomialLRT | 50 | 300 | CD | 0.08     | 0.375 | 0.303 | 0.283 | 0.045 | 115.900 |
| MultinomialLRT | 50 | 500 | CD | 1.00E-04 | 0.949 | 0.221 | 1.000 | 0.011 | 72.400  |
| MultinomialLRT | 50 | 500 | CD | 0.001    | 0.853 | 0.243 | 0.833 | 0.013 | 73.400  |
| MultinomialLRT | 50 | 500 | CD | 0.01     | 0.667 | 0.289 | 0.853 | 0.020 | 78.100  |
| MultinomialLRT | 50 | 500 | CD | 0.03     | 0.524 | 0.315 | 0.677 | 0.027 | 87.250  |
| MultinomialLRT | 50 | 500 | CD | 0.05     | 0.437 | 0.329 | 0.518 | 0.035 | 96.450  |
| MultinomialLRT | 50 | 500 | CD | 0.08     | 0.374 | 0.349 | 0.367 | 0.053 | 107.650 |
| CondGaussLRT   | 50 | 100 | CD | 1.00E-04 | 0.937 | 0.132 | 0.000 | 0.000 | 90.300  |
| CondGaussLRT   | 50 | 100 | CD | 0.001    | 0.896 | 0.153 | 0.250 | 0.001 | 90.300  |
| CondGaussLRT   | 50 | 100 | CD | 0.01     | 0.872 | 0.169 | 0.818 | 0.015 | 89.600  |
| CondGaussLRT   | 50 | 100 | CD | 0.03     | 0.866 | 0.171 | 0.900 | 0.016 | 89.250  |
| CondGaussLRT   | 50 | 100 | CD | 0.05     | 0.861 | 0.175 | 0.879 | 0.018 | 89.250  |
| CondGaussLRT   | 50 | 100 | CD | 0.08     | 0.854 | 0.186 | 0.835 | 0.025 | 88.600  |
| CondGaussLRT   | 50 | 300 | CD | 1.00E-04 | 0.971 | 0.217 | 0.750 | 0.019 | 79.750  |
| CondGaussLRT   | 50 | 300 | CD | 0.001    | 0.940 | 0.254 | 0.810 | 0.027 | 78.700  |
| CondGaussLRT   | 50 | 300 | CD | 0.01     | 0.892 | 0.277 | 0.844 | 0.044 | 78.500  |
| CondGaussLRT   | 50 | 300 | CD | 0.03     | 0.841 | 0.288 | 0.830 | 0.051 | 79.550  |
| CondGaussLRT   | 50 | 300 | CD | 0.05     | 0.837 | 0.295 | 0.840 | 0.060 | 79.250  |
| CondGaussLRT   | 50 | 300 | CD | 0.08     | 0.801 | 0.299 | 0.753 | 0.055 | 80.700  |
| CondGaussLRT   | 50 | 500 | CD | 1.00E-04 | 0.947 | 0.303 | 0.872 | 0.034 | 68.950  |
| CondGaussLRT   | 50 | 500 | CD | 0.001    | 0.961 | 0.337 | 0.844 | 0.054 | 67.150  |
| CondGaussLRT   | 50 | 500 | CD | 0.01     | 0.920 | 0.381 | 0.888 | 0.057 | 66.750  |
| CondGaussLRT   | 50 | 500 | CD | 0.03     | 0.882 | 0.395 | 0.830 | 0.072 | 66.800  |
| CondGaussLRT   | 50 | 500 | CD | 0.05     | 0.877 | 0.404 | 0.884 | 0.077 | 66.600  |
| CondGaussLRT   | 50 | 500 | CD | 0.08     | 0.828 | 0.406 | 0.776 | 0.073 | 68.350  |
| FisherZ        | 50 | 100 | DD | 1.00E-04 | 1.000 | 0.100 | 1.000 | 0.004 | 45.600  |
| FisherZ        | 50 | 100 | DD | 0.001    | 0.965 | 0.123 | 1.000 | 0.005 | 45.250  |
| FisherZ        | 50 | 100 | DD | 0.01     | 0.777 | 0.160 | 1.000 | 0.019 | 45.950  |
| FisherZ        | 50 | 100 | DD | 0.03     | 0.549 | 0.179 | 1.000 | 0.022 | 49.850  |
| FisherZ        | 50 | 100 | DD | 0.05     | 0.468 | 0.196 | 1.000 | 0.029 | 52.550  |
| FisherZ        | 50 | 100 | DD | 0.08     | 0.392 | 0.210 | 0.656 | 0.036 | 56.500  |
| FisherZ        | 50 | 300 | DD | 1.00E-04 | 1.000 | 0.204 | 1.000 | 0.013 | 38.850  |
| FisherZ        | 50 | 300 | DD | 0.001    | 0.988 | 0.236 | 1.000 | 0.013 | 38.300  |
| FisherZ        | 50 | 300 | DD | 0.01     | 0.889 | 0.313 | 1.000 | 0.021 | 38.450  |
| FisherZ        | 50 | 300 | DD | 0.03     | 0.725 | 0.327 | 0.813 | 0.023 | 41.750  |
| FisherZ        | 50 | 300 | DD | 0.05     | 0.591 | 0.334 | 0.636 | 0.039 | 46.200  |
| FisherZ        | 50 | 300 | DD | 0.08     | 0.478 | 0.349 | 0.601 | 0.043 | 52.500  |
| FisherZ        | 50 | 500 | DD | 1.00E-04 | 0.937 | 0.265 | 1.000 | 0.021 | 33.650  |
| FisherZ        | 50 | 500 | DD | 0.001    | 0.881 | 0.307 | 1.000 | 0.021 | 33.700  |
| FisherZ        | 50 | 500 | DD | 0.01     | 0.765 | 0.379 | 0.833 | 0.036 | 35.150  |
| FisherZ        | 50 | 500 | DD | 0.03     | 0.616 | 0.435 | 0.657 | 0.045 | 39.750  |
| FisherZ        | 50 | 500 | DD | 0.05     | 0.528 | 0.460 | 0.515 | 0.052 | 44.350  |
| FisherZ        | 50 | 500 | DD | 0.08     | 0.443 | 0.489 | 0.361 | 0.061 | 51.400  |
| ChiSquare      | 50 | 100 | DD | 1.00E-04 | 1.000 | 0.087 | NaN   | 0.000 | 45.950  |
| ChiSquare      | 50 | 100 | DD | 0.001    | 0.935 | 0.117 | NaN   | 0.000 | 45.650  |

|                |    |     |    |          |       |       |       |       |        |
|----------------|----|-----|----|----------|-------|-------|-------|-------|--------|
| ChiSquare      | 50 | 100 | DD | 0.01     | 0.934 | 0.131 | NaN   | 0.000 | 45.400 |
| ChiSquare      | 50 | 100 | DD | 0.03     | 0.917 | 0.149 | NaN   | 0.000 | 45.100 |
| ChiSquare      | 50 | 100 | DD | 0.05     | 0.895 | 0.163 | NaN   | 0.000 | 45.050 |
| ChiSquare      | 50 | 100 | DD | 0.08     | 0.919 | 0.183 | 1.000 | 0.006 | 44.350 |
| ChiSquare      | 50 | 300 | DD | 1.00E-04 | 0.990 | 0.293 | 1.000 | 0.007 | 37.300 |
| ChiSquare      | 50 | 300 | DD | 0.001    | 0.993 | 0.317 | 1.000 | 0.010 | 36.600 |
| ChiSquare      | 50 | 300 | DD | 0.01     | 0.953 | 0.378 | 1.000 | 0.039 | 35.300 |
| ChiSquare      | 50 | 300 | DD | 0.03     | 0.922 | 0.415 | 0.923 | 0.074 | 34.600 |
| ChiSquare      | 50 | 300 | DD | 0.05     | 0.909 | 0.428 | 0.897 | 0.084 | 34.300 |
| ChiSquare      | 50 | 300 | DD | 0.08     | 0.898 | 0.446 | 0.948 | 0.099 | 34.150 |
| ChiSquare      | 50 | 500 | DD | 1.00E-04 | 0.988 | 0.430 | 0.958 | 0.057 | 29.800 |
| ChiSquare      | 50 | 500 | DD | 0.001    | 0.962 | 0.491 | 0.917 | 0.114 | 27.900 |
| ChiSquare      | 50 | 500 | DD | 0.01     | 0.910 | 0.531 | 0.964 | 0.166 | 27.350 |
| ChiSquare      | 50 | 500 | DD | 0.03     | 0.899 | 0.554 | 0.965 | 0.205 | 26.250 |
| ChiSquare      | 50 | 500 | DD | 0.05     | 0.888 | 0.563 | 0.910 | 0.213 | 26.250 |
| ChiSquare      | 50 | 500 | DD | 0.08     | 0.878 | 0.587 | 0.963 | 0.240 | 25.650 |
| MultinomialLRT | 50 | 100 | DD | 1.00E-04 | 0.912 | 0.143 | 1.000 | 0.004 | 45.100 |
| MultinomialLRT | 50 | 100 | DD | 0.001    | 0.901 | 0.188 | 1.000 | 0.005 | 44.500 |
| MultinomialLRT | 50 | 100 | DD | 0.01     | 0.716 | 0.217 | 1.000 | 0.023 | 46.350 |
| MultinomialLRT | 50 | 100 | DD | 0.03     | 0.609 | 0.244 | 0.803 | 0.029 | 48.550 |
| MultinomialLRT | 50 | 100 | DD | 0.05     | 0.516 | 0.260 | 0.667 | 0.036 | 52.000 |
| MultinomialLRT | 50 | 100 | DD | 0.08     | 0.431 | 0.262 | 0.489 | 0.043 | 56.550 |
| MultinomialLRT | 50 | 300 | DD | 1.00E-04 | 0.967 | 0.366 | 0.600 | 0.011 | 36.450 |
| MultinomialLRT | 50 | 300 | DD | 0.001    | 0.945 | 0.407 | 0.643 | 0.018 | 35.750 |
| MultinomialLRT | 50 | 300 | DD | 0.01     | 0.818 | 0.472 | 0.782 | 0.047 | 37.550 |
| MultinomialLRT | 50 | 300 | DD | 0.03     | 0.707 | 0.520 | 0.589 | 0.050 | 41.050 |
| MultinomialLRT | 50 | 300 | DD | 0.05     | 0.598 | 0.529 | 0.618 | 0.061 | 46.150 |
| MultinomialLRT | 50 | 300 | DD | 0.08     | 0.527 | 0.545 | 0.491 | 0.090 | 50.700 |
| MultinomialLRT | 50 | 500 | DD | 1.00E-04 | 0.968 | 0.485 | 1.000 | 0.032 | 29.400 |
| MultinomialLRT | 50 | 500 | DD | 0.001    | 0.928 | 0.525 | 0.833 | 0.051 | 28.950 |
| MultinomialLRT | 50 | 500 | DD | 0.01     | 0.802 | 0.568 | 0.788 | 0.069 | 30.950 |
| MultinomialLRT | 50 | 500 | DD | 0.03     | 0.690 | 0.613 | 0.703 | 0.075 | 35.000 |
| MultinomialLRT | 50 | 500 | DD | 0.05     | 0.611 | 0.641 | 0.701 | 0.089 | 38.800 |
| MultinomialLRT | 50 | 500 | DD | 0.08     | 0.527 | 0.670 | 0.518 | 0.107 | 45.500 |
| CondGaussLRT   | 50 | 100 | DD | 1.00E-04 | 1.000 | 0.142 | NaN   | 0.000 | 44.800 |
| CondGaussLRT   | 50 | 100 | DD | 0.001    | 0.934 | 0.159 | NaN   | 0.000 | 44.700 |
| CondGaussLRT   | 50 | 100 | DD | 0.01     | 0.909 | 0.171 | 1.000 | 0.014 | 44.500 |
| CondGaussLRT   | 50 | 100 | DD | 0.03     | 0.901 | 0.166 | 1.000 | 0.014 | 44.600 |
| CondGaussLRT   | 50 | 100 | DD | 0.05     | 0.935 | 0.169 | 1.000 | 0.019 | 44.150 |
| CondGaussLRT   | 50 | 100 | DD | 0.08     | 0.917 | 0.182 | 0.952 | 0.027 | 43.900 |
| CondGaussLRT   | 50 | 300 | DD | 1.00E-04 | 0.988 | 0.288 | 1.000 | 0.025 | 37.000 |
| CondGaussLRT   | 50 | 300 | DD | 0.001    | 0.961 | 0.349 | 1.000 | 0.033 | 35.950 |
| CondGaussLRT   | 50 | 300 | DD | 0.01     | 0.977 | 0.381 | 1.000 | 0.059 | 34.650 |
| CondGaussLRT   | 50 | 300 | DD | 0.03     | 0.966 | 0.414 | 0.950 | 0.084 | 33.750 |
| CondGaussLRT   | 50 | 300 | DD | 0.05     | 0.949 | 0.417 | 0.933 | 0.074 | 34.250 |

## EVALUATION OF CAUSAL STRUCTURE LEARNING

|                |    |     |     |          |       |       |       |       |         |
|----------------|----|-----|-----|----------|-------|-------|-------|-------|---------|
| CondGaussLRT   | 50 | 300 | DD  | 0.08     | 0.933 | 0.425 | 0.875 | 0.058 | 34.900  |
| CondGaussLRT   | 50 | 500 | DD  | 1.00E-04 | 0.989 | 0.447 | 0.944 | 0.053 | 29.550  |
| CondGaussLRT   | 50 | 500 | DD  | 0.001    | 0.974 | 0.488 | 0.938 | 0.089 | 28.600  |
| CondGaussLRT   | 50 | 500 | DD  | 0.01     | 0.926 | 0.533 | 0.886 | 0.113 | 28.150  |
| CondGaussLRT   | 50 | 500 | DD  | 0.03     | 0.929 | 0.559 | 0.891 | 0.135 | 27.450  |
| CondGaussLRT   | 50 | 500 | DD  | 0.05     | 0.895 | 0.571 | 0.936 | 0.132 | 27.800  |
| CondGaussLRT   | 50 | 500 | DD  | 0.08     | 0.893 | 0.570 | 0.808 | 0.121 | 28.150  |
| FisherZ        | 50 | 100 | All | 1.00E-04 | 0.978 | 0.100 | 0.333 | 0.002 | 180.700 |
| FisherZ        | 50 | 100 | All | 0.001    | 0.930 | 0.122 | 0.688 | 0.007 | 179.550 |
| FisherZ        | 50 | 100 | All | 0.01     | 0.732 | 0.153 | 0.885 | 0.018 | 184.100 |
| FisherZ        | 50 | 100 | All | 0.03     | 0.576 | 0.179 | 0.906 | 0.022 | 195.350 |
| FisherZ        | 50 | 100 | All | 0.05     | 0.488 | 0.193 | 0.856 | 0.028 | 206.400 |
| FisherZ        | 50 | 100 | All | 0.08     | 0.417 | 0.218 | 0.703 | 0.037 | 222.900 |
| FisherZ        | 50 | 300 | All | 1.00E-04 | 0.994 | 0.198 | 0.958 | 0.025 | 155.150 |
| FisherZ        | 50 | 300 | All | 0.001    | 0.977 | 0.231 | 0.872 | 0.031 | 152.750 |
| FisherZ        | 50 | 300 | All | 0.01     | 0.814 | 0.279 | 0.888 | 0.045 | 157.250 |
| FisherZ        | 50 | 300 | All | 0.03     | 0.646 | 0.301 | 0.839 | 0.051 | 171.850 |
| FisherZ        | 50 | 300 | All | 0.05     | 0.542 | 0.312 | 0.672 | 0.064 | 186.750 |
| FisherZ        | 50 | 300 | All | 0.08     | 0.450 | 0.331 | 0.626 | 0.070 | 208.850 |
| FisherZ        | 50 | 500 | All | 1.00E-04 | 0.978 | 0.268 | 0.978 | 0.039 | 135.700 |
| FisherZ        | 50 | 500 | All | 0.001    | 0.946 | 0.300 | 0.978 | 0.042 | 134.450 |
| FisherZ        | 50 | 500 | All | 0.01     | 0.803 | 0.354 | 0.932 | 0.051 | 139.650 |
| FisherZ        | 50 | 500 | All | 0.03     | 0.648 | 0.390 | 0.854 | 0.059 | 155.050 |
| FisherZ        | 50 | 500 | All | 0.05     | 0.568 | 0.413 | 0.698 | 0.062 | 168.000 |
| FisherZ        | 50 | 500 | All | 0.08     | 0.474 | 0.442 | 0.526 | 0.074 | 191.750 |
| ChiSquare      | 50 | 100 | All | 1.00E-04 | 0.974 | 0.092 | NaN   | 0.000 | 181.300 |
| ChiSquare      | 50 | 100 | All | 0.001    | 0.952 | 0.117 | NaN   | 0.000 | 179.700 |
| ChiSquare      | 50 | 100 | All | 0.01     | 0.919 | 0.144 | 1.000 | 0.001 | 178.550 |
| ChiSquare      | 50 | 100 | All | 0.03     | 0.922 | 0.162 | 1.000 | 0.001 | 176.900 |
| ChiSquare      | 50 | 100 | All | 0.05     | 0.884 | 0.169 | 1.000 | 0.002 | 177.550 |
| ChiSquare      | 50 | 100 | All | 0.08     | 0.877 | 0.183 | 0.813 | 0.006 | 176.650 |
| ChiSquare      | 50 | 300 | All | 1.00E-04 | 0.983 | 0.232 | 1.000 | 0.005 | 154.550 |
| ChiSquare      | 50 | 300 | All | 0.001    | 0.974 | 0.263 | 1.000 | 0.005 | 152.250 |
| ChiSquare      | 50 | 300 | All | 0.01     | 0.935 | 0.312 | 0.967 | 0.026 | 149.050 |
| ChiSquare      | 50 | 300 | All | 0.03     | 0.918 | 0.348 | 0.944 | 0.042 | 146.400 |
| ChiSquare      | 50 | 300 | All | 0.05     | 0.901 | 0.357 | 0.909 | 0.049 | 146.700 |
| ChiSquare      | 50 | 300 | All | 0.08     | 0.880 | 0.379 | 0.915 | 0.061 | 146.250 |
| ChiSquare      | 50 | 500 | All | 1.00E-04 | 0.985 | 0.332 | 0.981 | 0.035 | 132.200 |
| ChiSquare      | 50 | 500 | All | 0.001    | 0.970 | 0.380 | 0.970 | 0.062 | 127.700 |
| ChiSquare      | 50 | 500 | All | 0.01     | 0.925 | 0.413 | 0.945 | 0.090 | 126.500 |
| ChiSquare      | 50 | 500 | All | 0.03     | 0.910 | 0.445 | 0.925 | 0.107 | 124.350 |
| ChiSquare      | 50 | 500 | All | 0.05     | 0.900 | 0.456 | 0.895 | 0.116 | 123.700 |
| ChiSquare      | 50 | 500 | All | 0.08     | 0.884 | 0.472 | 0.837 | 0.134 | 123.200 |
| MultinomialLRT | 50 | 100 | All | 1.00E-04 | 0.942 | 0.141 | 0.250 | 0.002 | 178.350 |
| MultinomialLRT | 50 | 100 | All | 0.001    | 0.862 | 0.168 | 0.667 | 0.007 | 178.650 |

|                |     |     |     |          |       |       |       |       |         |
|----------------|-----|-----|-----|----------|-------|-------|-------|-------|---------|
| MultinomialLRT | 50  | 100 | All | 0.01     | 0.714 | 0.209 | 0.818 | 0.018 | 184.250 |
| MultinomialLRT | 50  | 100 | All | 0.03     | 0.590 | 0.234 | 0.786 | 0.028 | 195.600 |
| MultinomialLRT | 50  | 100 | All | 0.05     | 0.508 | 0.250 | 0.606 | 0.033 | 208.500 |
| MultinomialLRT | 50  | 100 | All | 0.08     | 0.437 | 0.268 | 0.521 | 0.043 | 225.550 |
| MultinomialLRT | 50  | 300 | All | 1.00E-04 | 0.974 | 0.274 | 0.813 | 0.024 | 150.450 |
| MultinomialLRT | 50  | 300 | All | 0.001    | 0.935 | 0.311 | 0.825 | 0.031 | 149.350 |
| MultinomialLRT | 50  | 300 | All | 0.01     | 0.774 | 0.359 | 0.827 | 0.054 | 157.150 |
| MultinomialLRT | 50  | 300 | All | 0.03     | 0.644 | 0.394 | 0.711 | 0.063 | 172.800 |
| MultinomialLRT | 50  | 300 | All | 0.05     | 0.550 | 0.405 | 0.578 | 0.071 | 190.000 |
| MultinomialLRT | 50  | 300 | All | 0.08     | 0.481 | 0.428 | 0.471 | 0.090 | 209.650 |
| MultinomialLRT | 50  | 500 | All | 1.00E-04 | 0.966 | 0.357 | 0.979 | 0.041 | 129.900 |
| MultinomialLRT | 50  | 500 | All | 0.001    | 0.922 | 0.390 | 0.901 | 0.051 | 129.550 |
| MultinomialLRT | 50  | 500 | All | 0.01     | 0.786 | 0.438 | 0.849 | 0.063 | 137.050 |
| MultinomialLRT | 50  | 500 | All | 0.03     | 0.653 | 0.472 | 0.780 | 0.069 | 153.250 |
| MultinomialLRT | 50  | 500 | All | 0.05     | 0.570 | 0.491 | 0.681 | 0.079 | 169.000 |
| MultinomialLRT | 50  | 500 | All | 0.08     | 0.493 | 0.513 | 0.572 | 0.097 | 190.650 |
| CondGaussLRT   | 50  | 100 | All | 1.00E-04 | 0.968 | 0.138 | 0.000 | 0.000 | 177.800 |
| CondGaussLRT   | 50  | 100 | All | 0.001    | 0.926 | 0.156 | 0.500 | 0.003 | 177.250 |
| CondGaussLRT   | 50  | 100 | All | 0.01     | 0.874 | 0.173 | 0.875 | 0.016 | 177.050 |
| CondGaussLRT   | 50  | 100 | All | 0.03     | 0.886 | 0.175 | 0.932 | 0.016 | 176.200 |
| CondGaussLRT   | 50  | 100 | All | 0.05     | 0.885 | 0.181 | 0.942 | 0.018 | 175.750 |
| CondGaussLRT   | 50  | 100 | All | 0.08     | 0.873 | 0.192 | 0.880 | 0.025 | 174.950 |
| CondGaussLRT   | 50  | 300 | All | 1.00E-04 | 0.982 | 0.277 | 0.911 | 0.032 | 149.350 |
| CondGaussLRT   | 50  | 300 | All | 0.001    | 0.964 | 0.321 | 0.927 | 0.044 | 145.950 |
| CondGaussLRT   | 50  | 300 | All | 0.01     | 0.940 | 0.350 | 0.930 | 0.068 | 143.300 |
| CondGaussLRT   | 50  | 300 | All | 0.03     | 0.908 | 0.371 | 0.908 | 0.079 | 143.050 |
| CondGaussLRT   | 50  | 300 | All | 0.05     | 0.897 | 0.380 | 0.865 | 0.085 | 143.400 |
| CondGaussLRT   | 50  | 300 | All | 0.08     | 0.866 | 0.385 | 0.837 | 0.081 | 145.850 |
| CondGaussLRT   | 50  | 500 | All | 1.00E-04 | 0.975 | 0.388 | 0.944 | 0.064 | 126.100 |
| CondGaussLRT   | 50  | 500 | All | 0.001    | 0.977 | 0.422 | 0.933 | 0.086 | 122.450 |
| CondGaussLRT   | 50  | 500 | All | 0.01     | 0.940 | 0.470 | 0.909 | 0.105 | 120.450 |
| CondGaussLRT   | 50  | 500 | All | 0.03     | 0.915 | 0.486 | 0.875 | 0.124 | 120.000 |
| CondGaussLRT   | 50  | 500 | All | 0.05     | 0.900 | 0.495 | 0.913 | 0.125 | 120.300 |
| CondGaussLRT   | 50  | 500 | All | 0.08     | 0.874 | 0.500 | 0.824 | 0.126 | 122.500 |
| FisherZ        | 100 | 100 | CC  | 1.00E-04 | 0.983 | 0.120 | 1.000 | 0.009 | 93.650  |
| FisherZ        | 100 | 100 | CC  | 0.001    | 0.882 | 0.150 | 1.000 | 0.013 | 93.500  |
| FisherZ        | 100 | 100 | CC  | 0.01     | 0.673 | 0.183 | 1.000 | 0.024 | 97.800  |
| FisherZ        | 100 | 100 | CC  | 0.03     | 0.521 | 0.209 | 0.932 | 0.029 | 105.700 |
| FisherZ        | 100 | 100 | CC  | 0.05     | 0.428 | 0.229 | 0.775 | 0.039 | 115.250 |
| FisherZ        | 100 | 100 | CC  | 0.08     | 0.346 | 0.242 | 0.558 | 0.053 | 128.600 |
| FisherZ        | 100 | 300 | CC  | 1.00E-04 | 0.979 | 0.299 | 1.000 | 0.066 | 69.750  |
| FisherZ        | 100 | 300 | CC  | 0.001    | 0.947 | 0.329 | 0.933 | 0.082 | 68.700  |
| FisherZ        | 100 | 300 | CC  | 0.01     | 0.773 | 0.377 | 0.902 | 0.106 | 72.350  |
| FisherZ        | 100 | 300 | CC  | 0.03     | 0.566 | 0.399 | 0.785 | 0.124 | 85.250  |
| FisherZ        | 100 | 300 | CC  | 0.05     | 0.464 | 0.411 | 0.621 | 0.125 | 98.000  |

## EVALUATION OF CAUSAL STRUCTURE LEARNING

|                |     |     |    |          |       |       |       |       |         |
|----------------|-----|-----|----|----------|-------|-------|-------|-------|---------|
| FisherZ        | 100 | 300 | CC | 0.08     | 0.396 | 0.438 | 0.568 | 0.132 | 113.300 |
| FisherZ        | 100 | 500 | CC | 1.00E-04 | 0.995 | 0.400 | 0.985 | 0.088 | 60.900  |
| FisherZ        | 100 | 500 | CC | 0.001    | 0.975 | 0.432 | 0.985 | 0.096 | 59.900  |
| FisherZ        | 100 | 500 | CC | 0.01     | 0.822 | 0.471 | 0.983 | 0.107 | 63.950  |
| FisherZ        | 100 | 500 | CC | 0.03     | 0.635 | 0.508 | 0.889 | 0.136 | 75.200  |
| FisherZ        | 100 | 500 | CC | 0.05     | 0.535 | 0.527 | 0.775 | 0.156 | 87.150  |
| FisherZ        | 100 | 500 | CC | 0.08     | 0.446 | 0.546 | 0.614 | 0.180 | 104.000 |
| ChiSquare      | 100 | 100 | CC | 1.00E-04 | 0.946 | 0.086 | NaN   | 0.000 | 96.100  |
| ChiSquare      | 100 | 100 | CC | 0.001    | 0.909 | 0.114 | NaN   | 0.000 | 95.600  |
| ChiSquare      | 100 | 100 | CC | 0.01     | 0.927 | 0.136 | 1.000 | 0.001 | 94.200  |
| ChiSquare      | 100 | 100 | CC | 0.03     | 0.908 | 0.144 | 0.500 | 0.001 | 94.300  |
| ChiSquare      | 100 | 100 | CC | 0.05     | 0.898 | 0.155 | 0.500 | 0.001 | 94.050  |
| ChiSquare      | 100 | 100 | CC | 0.08     | 0.846 | 0.163 | 0.500 | 0.005 | 94.700  |
| ChiSquare      | 100 | 300 | CC | 1.00E-04 | 0.991 | 0.306 | 0.750 | 0.007 | 71.450  |
| ChiSquare      | 100 | 300 | CC | 0.001    | 0.970 | 0.343 | 1.000 | 0.021 | 69.950  |
| ChiSquare      | 100 | 300 | CC | 0.01     | 0.956 | 0.392 | 1.000 | 0.033 | 68.350  |
| ChiSquare      | 100 | 300 | CC | 0.03     | 0.954 | 0.416 | 1.000 | 0.051 | 67.100  |
| ChiSquare      | 100 | 300 | CC | 0.05     | 0.924 | 0.420 | 0.967 | 0.050 | 68.150  |
| ChiSquare      | 100 | 300 | CC | 0.08     | 0.909 | 0.436 | 0.913 | 0.061 | 67.800  |
| ChiSquare      | 100 | 500 | CC | 1.00E-04 | 0.987 | 0.407 | 1.000 | 0.024 | 63.650  |
| ChiSquare      | 100 | 500 | CC | 0.001    | 0.965 | 0.433 | 1.000 | 0.039 | 62.900  |
| ChiSquare      | 100 | 500 | CC | 0.01     | 0.958 | 0.485 | 0.926 | 0.058 | 60.800  |
| ChiSquare      | 100 | 500 | CC | 0.03     | 0.936 | 0.519 | 0.846 | 0.072 | 60.000  |
| ChiSquare      | 100 | 500 | CC | 0.05     | 0.931 | 0.532 | 0.879 | 0.082 | 59.500  |
| ChiSquare      | 100 | 500 | CC | 0.08     | 0.908 | 0.556 | 0.888 | 0.120 | 58.550  |
| MultinomialLRT | 100 | 100 | CC | 1.00E-04 | 0.950 | 0.145 | 1.000 | 0.009 | 93.350  |
| MultinomialLRT | 100 | 100 | CC | 0.001    | 0.846 | 0.177 | 1.000 | 0.015 | 93.900  |
| MultinomialLRT | 100 | 100 | CC | 0.01     | 0.626 | 0.220 | 0.787 | 0.024 | 100.500 |
| MultinomialLRT | 100 | 100 | CC | 0.03     | 0.451 | 0.235 | 0.608 | 0.028 | 113.950 |
| MultinomialLRT | 100 | 100 | CC | 0.05     | 0.409 | 0.255 | 0.485 | 0.044 | 120.450 |
| MultinomialLRT | 100 | 100 | CC | 0.08     | 0.351 | 0.273 | 0.474 | 0.049 | 132.650 |
| MultinomialLRT | 100 | 300 | CC | 1.00E-04 | 0.953 | 0.350 | 0.973 | 0.063 | 68.400  |
| MultinomialLRT | 100 | 300 | CC | 0.001    | 0.902 | 0.383 | 0.907 | 0.081 | 68.150  |
| MultinomialLRT | 100 | 300 | CC | 0.01     | 0.713 | 0.432 | 0.854 | 0.109 | 75.050  |
| MultinomialLRT | 100 | 300 | CC | 0.03     | 0.572 | 0.459 | 0.637 | 0.123 | 87.900  |
| MultinomialLRT | 100 | 300 | CC | 0.05     | 0.488 | 0.470 | 0.588 | 0.131 | 99.750  |
| MultinomialLRT | 100 | 300 | CC | 0.08     | 0.423 | 0.492 | 0.461 | 0.153 | 114.300 |
| MultinomialLRT | 100 | 500 | CC | 1.00E-04 | 0.977 | 0.463 | 0.985 | 0.097 | 58.700  |
| MultinomialLRT | 100 | 500 | CC | 0.001    | 0.920 | 0.492 | 0.985 | 0.103 | 59.300  |
| MultinomialLRT | 100 | 500 | CC | 0.01     | 0.782 | 0.550 | 0.937 | 0.120 | 64.650  |
| MultinomialLRT | 100 | 500 | CC | 0.03     | 0.637 | 0.579 | 0.766 | 0.158 | 75.850  |
| MultinomialLRT | 100 | 500 | CC | 0.05     | 0.547 | 0.587 | 0.722 | 0.183 | 86.650  |
| MultinomialLRT | 100 | 500 | CC | 0.08     | 0.473 | 0.607 | 0.599 | 0.200 | 101.550 |
| CondGaussLRT   | 100 | 100 | CC | 1.00E-04 | 0.972 | 0.145 | 1.000 | 0.009 | 92.750  |
| CondGaussLRT   | 100 | 100 | CC | 0.001    | 0.899 | 0.168 | 1.000 | 0.014 | 92.750  |

|              |     |     |    |          |       |       |       |       |         |
|--------------|-----|-----|----|----------|-------|-------|-------|-------|---------|
| CondGaussLRT | 100 | 100 | CC | 0.01     | 0.867 | 0.174 | 1.000 | 0.016 | 93.150  |
| CondGaussLRT | 100 | 100 | CC | 0.03     | 0.865 | 0.179 | 1.000 | 0.022 | 93.000  |
| CondGaussLRT | 100 | 100 | CC | 0.05     | 0.835 | 0.202 | 0.981 | 0.031 | 92.700  |
| CondGaussLRT | 100 | 100 | CC | 0.08     | 0.802 | 0.210 | 0.981 | 0.036 | 93.050  |
| CondGaussLRT | 100 | 300 | CC | 1.00E-04 | 0.968 | 0.366 | 0.985 | 0.078 | 66.850  |
| CondGaussLRT | 100 | 300 | CC | 0.001    | 0.950 | 0.394 | 0.939 | 0.098 | 65.800  |
| CondGaussLRT | 100 | 300 | CC | 0.01     | 0.932 | 0.430 | 0.912 | 0.124 | 64.000  |
| CondGaussLRT | 100 | 300 | CC | 0.03     | 0.910 | 0.449 | 0.933 | 0.131 | 64.150  |
| CondGaussLRT | 100 | 300 | CC | 0.05     | 0.901 | 0.452 | 0.920 | 0.136 | 64.250  |
| CondGaussLRT | 100 | 300 | CC | 0.08     | 0.880 | 0.454 | 0.855 | 0.152 | 64.900  |
| CondGaussLRT | 100 | 500 | CC | 1.00E-04 | 0.992 | 0.471 | 0.967 | 0.119 | 57.150  |
| CondGaussLRT | 100 | 500 | CC | 0.001    | 0.979 | 0.501 | 0.985 | 0.148 | 55.350  |
| CondGaussLRT | 100 | 500 | CC | 0.01     | 0.967 | 0.529 | 0.988 | 0.173 | 53.800  |
| CondGaussLRT | 100 | 500 | CC | 0.03     | 0.937 | 0.556 | 0.921 | 0.201 | 53.600  |
| CondGaussLRT | 100 | 500 | CC | 0.05     | 0.911 | 0.566 | 0.917 | 0.200 | 54.800  |
| CondGaussLRT | 100 | 500 | CC | 0.08     | 0.880 | 0.564 | 0.957 | 0.211 | 55.800  |
| FisherZ      | 100 | 100 | CD | 1.00E-04 | 0.972 | 0.091 | 0.857 | 0.005 | 194.650 |
| FisherZ      | 100 | 100 | CD | 0.001    | 0.889 | 0.109 | 0.962 | 0.010 | 194.250 |
| FisherZ      | 100 | 100 | CD | 0.01     | 0.615 | 0.136 | 0.956 | 0.018 | 204.150 |
| FisherZ      | 100 | 100 | CD | 0.03     | 0.436 | 0.160 | 0.889 | 0.031 | 223.850 |
| FisherZ      | 100 | 100 | CD | 0.05     | 0.360 | 0.171 | 0.730 | 0.034 | 241.550 |
| FisherZ      | 100 | 100 | CD | 0.08     | 0.299 | 0.186 | 0.517 | 0.040 | 265.800 |
| FisherZ      | 100 | 300 | CD | 1.00E-04 | 0.979 | 0.154 | 0.987 | 0.026 | 161.750 |
| FisherZ      | 100 | 300 | CD | 0.001    | 0.912 | 0.184 | 0.989 | 0.034 | 160.700 |
| FisherZ      | 100 | 300 | CD | 0.01     | 0.659 | 0.228 | 0.919 | 0.042 | 172.550 |
| FisherZ      | 100 | 300 | CD | 0.03     | 0.489 | 0.262 | 0.708 | 0.049 | 195.650 |
| FisherZ      | 100 | 300 | CD | 0.05     | 0.389 | 0.283 | 0.528 | 0.054 | 223.800 |
| FisherZ      | 100 | 300 | CD | 0.08     | 0.316 | 0.301 | 0.412 | 0.060 | 259.450 |
| FisherZ      | 100 | 500 | CD | 1.00E-04 | 0.963 | 0.214 | 1.000 | 0.031 | 140.100 |
| FisherZ      | 100 | 500 | CD | 0.001    | 0.924 | 0.234 | 0.929 | 0.035 | 140.150 |
| FisherZ      | 100 | 500 | CD | 0.01     | 0.679 | 0.276 | 0.917 | 0.040 | 151.050 |
| FisherZ      | 100 | 500 | CD | 0.03     | 0.472 | 0.307 | 0.729 | 0.046 | 178.200 |
| FisherZ      | 100 | 500 | CD | 0.05     | 0.384 | 0.330 | 0.518 | 0.049 | 204.700 |
| FisherZ      | 100 | 500 | CD | 0.08     | 0.296 | 0.343 | 0.370 | 0.060 | 246.600 |
| ChiSquare    | 100 | 100 | CD | 1.00E-04 | 0.987 | 0.081 | NaN   | 0.000 | 195.950 |
| ChiSquare    | 100 | 100 | CD | 0.001    | 0.938 | 0.098 | NaN   | 0.000 | 195.500 |
| ChiSquare    | 100 | 100 | CD | 0.01     | 0.907 | 0.115 | 1.000 | 0.002 | 194.400 |
| ChiSquare    | 100 | 100 | CD | 0.03     | 0.918 | 0.125 | 1.000 | 0.002 | 193.400 |
| ChiSquare    | 100 | 100 | CD | 0.05     | 0.908 | 0.136 | 0.750 | 0.002 | 193.050 |
| ChiSquare    | 100 | 100 | CD | 0.08     | 0.832 | 0.149 | 0.458 | 0.002 | 194.800 |
| ChiSquare    | 100 | 300 | CD | 1.00E-04 | 0.986 | 0.179 | 1.000 | 0.006 | 161.800 |
| ChiSquare    | 100 | 300 | CD | 0.001    | 0.968 | 0.213 | 1.000 | 0.014 | 158.850 |
| ChiSquare    | 100 | 300 | CD | 0.01     | 0.951 | 0.246 | 1.000 | 0.025 | 156.100 |
| ChiSquare    | 100 | 300 | CD | 0.03     | 0.937 | 0.263 | 0.934 | 0.033 | 154.800 |
| ChiSquare    | 100 | 300 | CD | 0.05     | 0.945 | 0.276 | 0.908 | 0.041 | 152.850 |



## EVALUATION OF CAUSAL STRUCTURE LEARNING

|                |     |     |    |          |       |       |       |       |         |
|----------------|-----|-----|----|----------|-------|-------|-------|-------|---------|
| ChiSquare      | 100 | 300 | CD | 0.08     | 0.908 | 0.304 | 0.889 | 0.056 | 151.650 |
| ChiSquare      | 100 | 500 | CD | 1.00E-04 | 0.968 | 0.260 | 1.000 | 0.015 | 138.550 |
| ChiSquare      | 100 | 500 | CD | 0.001    | 0.954 | 0.293 | 0.983 | 0.030 | 135.800 |
| ChiSquare      | 100 | 500 | CD | 0.01     | 0.938 | 0.327 | 0.993 | 0.052 | 132.950 |
| ChiSquare      | 100 | 500 | CD | 0.03     | 0.924 | 0.355 | 0.982 | 0.082 | 129.900 |
| ChiSquare      | 100 | 500 | CD | 0.05     | 0.890 | 0.365 | 0.947 | 0.088 | 131.000 |
| ChiSquare      | 100 | 500 | CD | 0.08     | 0.865 | 0.378 | 0.924 | 0.100 | 131.000 |
| MultinomialLRT | 100 | 100 | CD | 1.00E-04 | 0.898 | 0.117 | 0.833 | 0.004 | 194.250 |
| MultinomialLRT | 100 | 100 | CD | 0.001    | 0.767 | 0.138 | 0.900 | 0.011 | 196.850 |
| MultinomialLRT | 100 | 100 | CD | 0.01     | 0.551 | 0.174 | 0.868 | 0.021 | 211.550 |
| MultinomialLRT | 100 | 100 | CD | 0.03     | 0.422 | 0.199 | 0.692 | 0.033 | 233.750 |
| MultinomialLRT | 100 | 100 | CD | 0.05     | 0.357 | 0.213 | 0.508 | 0.037 | 253.550 |
| MultinomialLRT | 100 | 100 | CD | 0.08     | 0.310 | 0.227 | 0.360 | 0.045 | 275.850 |
| MultinomialLRT | 100 | 300 | CD | 1.00E-04 | 0.941 | 0.220 | 0.987 | 0.027 | 157.550 |
| MultinomialLRT | 100 | 300 | CD | 0.001    | 0.827 | 0.252 | 0.925 | 0.037 | 160.050 |
| MultinomialLRT | 100 | 300 | CD | 0.01     | 0.642 | 0.291 | 0.861 | 0.049 | 174.700 |
| MultinomialLRT | 100 | 300 | CD | 0.03     | 0.493 | 0.333 | 0.668 | 0.066 | 201.550 |
| MultinomialLRT | 100 | 300 | CD | 0.05     | 0.404 | 0.349 | 0.526 | 0.069 | 231.500 |
| MultinomialLRT | 100 | 300 | CD | 0.08     | 0.339 | 0.366 | 0.414 | 0.083 | 264.350 |
| MultinomialLRT | 100 | 500 | CD | 1.00E-04 | 0.960 | 0.289 | 1.000 | 0.037 | 134.900 |
| MultinomialLRT | 100 | 500 | CD | 0.001    | 0.865 | 0.312 | 0.974 | 0.042 | 137.900 |
| MultinomialLRT | 100 | 500 | CD | 0.01     | 0.605 | 0.356 | 0.756 | 0.054 | 159.100 |
| MultinomialLRT | 100 | 500 | CD | 0.03     | 0.442 | 0.389 | 0.545 | 0.066 | 194.700 |
| MultinomialLRT | 100 | 500 | CD | 0.05     | 0.366 | 0.408 | 0.444 | 0.071 | 227.000 |
| MultinomialLRT | 100 | 500 | CD | 0.08     | 0.304 | 0.426 | 0.317 | 0.079 | 267.050 |
| CondGaussLRT   | 100 | 100 | CD | 1.00E-04 | 0.979 | 0.111 | 0.857 | 0.004 | 193.000 |
| CondGaussLRT   | 100 | 100 | CD | 0.001    | 0.886 | 0.130 | 0.964 | 0.011 | 193.100 |
| CondGaussLRT   | 100 | 100 | CD | 0.01     | 0.905 | 0.142 | 0.956 | 0.019 | 191.150 |
| CondGaussLRT   | 100 | 100 | CD | 0.03     | 0.901 | 0.144 | 0.956 | 0.023 | 190.400 |
| CondGaussLRT   | 100 | 100 | CD | 0.05     | 0.865 | 0.153 | 0.958 | 0.027 | 190.600 |
| CondGaussLRT   | 100 | 100 | CD | 0.08     | 0.812 | 0.160 | 0.956 | 0.029 | 191.950 |
| CondGaussLRT   | 100 | 300 | CD | 1.00E-04 | 0.982 | 0.233 | 0.880 | 0.035 | 155.150 |
| CondGaussLRT   | 100 | 300 | CD | 0.001    | 0.959 | 0.267 | 0.961 | 0.052 | 151.850 |
| CondGaussLRT   | 100 | 300 | CD | 0.01     | 0.926 | 0.304 | 0.929 | 0.070 | 149.250 |
| CondGaussLRT   | 100 | 300 | CD | 0.03     | 0.905 | 0.320 | 0.911 | 0.079 | 148.950 |
| CondGaussLRT   | 100 | 300 | CD | 0.05     | 0.880 | 0.329 | 0.927 | 0.089 | 149.200 |
| CondGaussLRT   | 100 | 300 | CD | 0.08     | 0.858 | 0.331 | 0.863 | 0.087 | 151.300 |
| CondGaussLRT   | 100 | 500 | CD | 1.00E-04 | 0.979 | 0.339 | 0.972 | 0.069 | 128.150 |
| CondGaussLRT   | 100 | 500 | CD | 0.001    | 0.961 | 0.366 | 0.963 | 0.084 | 126.250 |
| CondGaussLRT   | 100 | 500 | CD | 0.01     | 0.915 | 0.398 | 0.911 | 0.102 | 125.650 |
| CondGaussLRT   | 100 | 500 | CD | 0.03     | 0.886 | 0.422 | 0.878 | 0.106 | 126.500 |
| CondGaussLRT   | 100 | 500 | CD | 0.05     | 0.876 | 0.428 | 0.852 | 0.111 | 126.950 |
| CondGaussLRT   | 100 | 500 | CD | 0.08     | 0.839 | 0.431 | 0.815 | 0.110 | 130.050 |
| FisherZ        | 100 | 100 | DD | 1.00E-04 | 0.954 | 0.095 | 1.000 | 0.008 | 95.900  |
| FisherZ        | 100 | 100 | DD | 0.001    | 0.826 | 0.114 | 1.000 | 0.015 | 96.000  |

|                |     |     |    |          |       |       |       |       |         |
|----------------|-----|-----|----|----------|-------|-------|-------|-------|---------|
| FisherZ        | 100 | 100 | DD | 0.01     | 0.627 | 0.154 | 1.000 | 0.023 | 99.600  |
| FisherZ        | 100 | 100 | DD | 0.03     | 0.458 | 0.176 | 0.885 | 0.031 | 109.350 |
| FisherZ        | 100 | 100 | DD | 0.05     | 0.375 | 0.188 | 0.750 | 0.036 | 118.850 |
| FisherZ        | 100 | 100 | DD | 0.08     | 0.310 | 0.203 | 0.599 | 0.047 | 129.550 |
| FisherZ        | 100 | 300 | DD | 1.00E-04 | 0.972 | 0.201 | 1.000 | 0.034 | 80.150  |
| FisherZ        | 100 | 300 | DD | 0.001    | 0.929 | 0.242 | 1.000 | 0.043 | 79.100  |
| FisherZ        | 100 | 300 | DD | 0.01     | 0.749 | 0.291 | 0.974 | 0.053 | 83.200  |
| FisherZ        | 100 | 300 | DD | 0.03     | 0.520 | 0.329 | 0.763 | 0.070 | 98.200  |
| FisherZ        | 100 | 300 | DD | 0.05     | 0.434 | 0.350 | 0.633 | 0.080 | 110.850 |
| FisherZ        | 100 | 300 | DD | 0.08     | 0.361 | 0.370 | 0.505 | 0.095 | 127.300 |
| FisherZ        | 100 | 500 | DD | 1.00E-04 | 0.974 | 0.228 | 1.000 | 0.026 | 73.100  |
| FisherZ        | 100 | 500 | DD | 0.001    | 0.933 | 0.272 | 0.955 | 0.030 | 72.550  |
| FisherZ        | 100 | 500 | DD | 0.01     | 0.695 | 0.328 | 0.889 | 0.034 | 79.700  |
| FisherZ        | 100 | 500 | DD | 0.03     | 0.504 | 0.377 | 0.652 | 0.045 | 95.450  |
| FisherZ        | 100 | 500 | DD | 0.05     | 0.395 | 0.402 | 0.508 | 0.055 | 113.450 |
| FisherZ        | 100 | 500 | DD | 0.08     | 0.316 | 0.418 | 0.435 | 0.068 | 135.850 |
| ChiSquare      | 100 | 100 | DD | 1.00E-04 | 0.948 | 0.083 | NaN   | 0.000 | 96.650  |
| ChiSquare      | 100 | 100 | DD | 0.001    | 0.916 | 0.107 | NaN   | 0.000 | 96.150  |
| ChiSquare      | 100 | 100 | DD | 0.01     | 0.887 | 0.114 | 0.000 | 0.000 | 96.150  |
| ChiSquare      | 100 | 100 | DD | 0.03     | 0.907 | 0.137 | 0.000 | 0.000 | 95.200  |
| ChiSquare      | 100 | 100 | DD | 0.05     | 0.918 | 0.144 | 1.000 | 0.002 | 94.950  |
| ChiSquare      | 100 | 100 | DD | 0.08     | 0.840 | 0.156 | 0.750 | 0.003 | 95.450  |
| ChiSquare      | 100 | 300 | DD | 1.00E-04 | 0.997 | 0.257 | 1.000 | 0.008 | 79.100  |
| ChiSquare      | 100 | 300 | DD | 0.001    | 0.980 | 0.283 | 1.000 | 0.020 | 77.950  |
| ChiSquare      | 100 | 300 | DD | 0.01     | 0.966 | 0.316 | 0.988 | 0.040 | 76.050  |
| ChiSquare      | 100 | 300 | DD | 0.03     | 0.954 | 0.336 | 0.985 | 0.049 | 75.300  |
| ChiSquare      | 100 | 300 | DD | 0.05     | 0.924 | 0.349 | 0.984 | 0.061 | 75.300  |
| ChiSquare      | 100 | 300 | DD | 0.08     | 0.886 | 0.363 | 0.969 | 0.074 | 75.600  |
| ChiSquare      | 100 | 500 | DD | 1.00E-04 | 0.985 | 0.330 | 0.978 | 0.031 | 68.750  |
| ChiSquare      | 100 | 500 | DD | 0.001    | 0.956 | 0.361 | 0.972 | 0.047 | 67.700  |
| ChiSquare      | 100 | 500 | DD | 0.01     | 0.934 | 0.400 | 0.944 | 0.082 | 65.950  |
| ChiSquare      | 100 | 500 | DD | 0.03     | 0.938 | 0.432 | 0.955 | 0.101 | 63.950  |
| ChiSquare      | 100 | 500 | DD | 0.05     | 0.922 | 0.453 | 0.910 | 0.111 | 63.800  |
| ChiSquare      | 100 | 500 | DD | 0.08     | 0.899 | 0.467 | 0.896 | 0.124 | 63.700  |
| MultinomialLRT | 100 | 100 | DD | 1.00E-04 | 0.885 | 0.131 | 1.000 | 0.008 | 95.000  |
| MultinomialLRT | 100 | 100 | DD | 0.001    | 0.763 | 0.149 | 1.000 | 0.016 | 96.300  |
| MultinomialLRT | 100 | 100 | DD | 0.01     | 0.607 | 0.190 | 0.733 | 0.023 | 101.200 |
| MultinomialLRT | 100 | 100 | DD | 0.03     | 0.435 | 0.214 | 0.523 | 0.030 | 114.850 |
| MultinomialLRT | 100 | 100 | DD | 0.05     | 0.381 | 0.227 | 0.487 | 0.037 | 123.000 |
| MultinomialLRT | 100 | 100 | DD | 0.08     | 0.333 | 0.244 | 0.437 | 0.049 | 133.750 |
| MultinomialLRT | 100 | 300 | DD | 1.00E-04 | 0.974 | 0.294 | 1.000 | 0.037 | 76.350  |
| MultinomialLRT | 100 | 300 | DD | 0.001    | 0.901 | 0.329 | 0.877 | 0.049 | 76.750  |
| MultinomialLRT | 100 | 300 | DD | 0.01     | 0.732 | 0.391 | 0.881 | 0.066 | 82.400  |
| MultinomialLRT | 100 | 300 | DD | 0.03     | 0.547 | 0.427 | 0.653 | 0.082 | 98.250  |
| MultinomialLRT | 100 | 300 | DD | 0.05     | 0.480 | 0.441 | 0.600 | 0.090 | 109.150 |

EVALUATION OF CAUSAL STRUCTURE LEARNING

|                |     |     |     |          |       |       |       |       |         |
|----------------|-----|-----|-----|----------|-------|-------|-------|-------|---------|
| MultinomialLRT | 100 | 300 | DD  | 0.08     | 0.406 | 0.468 | 0.542 | 0.119 | 125.150 |
| MultinomialLRT | 100 | 500 | DD  | 1.00E-04 | 0.967 | 0.404 | 0.979 | 0.031 | 66.350  |
| MultinomialLRT | 100 | 500 | DD  | 0.001    | 0.905 | 0.460 | 0.887 | 0.040 | 67.050  |
| MultinomialLRT | 100 | 500 | DD  | 0.01     | 0.714 | 0.515 | 0.819 | 0.066 | 75.950  |
| MultinomialLRT | 100 | 500 | DD  | 0.03     | 0.556 | 0.556 | 0.591 | 0.094 | 92.400  |
| MultinomialLRT | 100 | 500 | DD  | 0.05     | 0.470 | 0.581 | 0.496 | 0.102 | 108.350 |
| MultinomialLRT | 100 | 500 | DD  | 0.08     | 0.397 | 0.605 | 0.405 | 0.114 | 127.400 |
| CondGaussLRT   | 100 | 100 | DD  | 1.00E-04 | 0.948 | 0.119 | 1.000 | 0.006 | 94.850  |
| CondGaussLRT   | 100 | 100 | DD  | 0.001    | 0.911 | 0.128 | 1.000 | 0.011 | 94.650  |
| CondGaussLRT   | 100 | 100 | DD  | 0.01     | 0.900 | 0.147 | 1.000 | 0.019 | 93.800  |
| CondGaussLRT   | 100 | 100 | DD  | 0.03     | 0.871 | 0.147 | 1.000 | 0.022 | 94.250  |
| CondGaussLRT   | 100 | 100 | DD  | 0.05     | 0.857 | 0.153 | 1.000 | 0.031 | 93.900  |
| CondGaussLRT   | 100 | 100 | DD  | 0.08     | 0.837 | 0.158 | 0.949 | 0.035 | 94.200  |
| CondGaussLRT   | 100 | 300 | DD  | 1.00E-04 | 0.983 | 0.287 | 0.990 | 0.039 | 76.300  |
| CondGaussLRT   | 100 | 300 | DD  | 0.001    | 0.969 | 0.305 | 1.000 | 0.056 | 75.200  |
| CondGaussLRT   | 100 | 300 | DD  | 0.01     | 0.954 | 0.340 | 0.992 | 0.076 | 73.450  |
| CondGaussLRT   | 100 | 300 | DD  | 0.03     | 0.927 | 0.364 | 0.964 | 0.090 | 72.800  |
| CondGaussLRT   | 100 | 300 | DD  | 0.05     | 0.906 | 0.365 | 0.939 | 0.093 | 73.450  |
| CondGaussLRT   | 100 | 300 | DD  | 0.08     | 0.883 | 0.375 | 0.936 | 0.094 | 74.050  |
| CondGaussLRT   | 100 | 500 | DD  | 1.00E-04 | 0.987 | 0.384 | 0.980 | 0.078 | 65.550  |
| CondGaussLRT   | 100 | 500 | DD  | 0.001    | 0.972 | 0.430 | 0.973 | 0.111 | 63.200  |
| CondGaussLRT   | 100 | 500 | DD  | 0.01     | 0.959 | 0.466 | 0.936 | 0.142 | 61.650  |
| CondGaussLRT   | 100 | 500 | DD  | 0.03     | 0.942 | 0.473 | 0.927 | 0.135 | 62.150  |
| CondGaussLRT   | 100 | 500 | DD  | 0.05     | 0.917 | 0.475 | 0.868 | 0.136 | 63.050  |
| CondGaussLRT   | 100 | 500 | DD  | 0.08     | 0.904 | 0.491 | 0.872 | 0.136 | 63.100  |
| FisherZ        | 100 | 100 | All | 1.00E-04 | 0.976 | 0.098 | 0.944 | 0.007 | 384.200 |
| FisherZ        | 100 | 100 | All | 0.001    | 0.889 | 0.120 | 0.983 | 0.012 | 383.750 |
| FisherZ        | 100 | 100 | All | 0.01     | 0.647 | 0.151 | 0.981 | 0.020 | 401.550 |
| FisherZ        | 100 | 100 | All | 0.03     | 0.472 | 0.175 | 0.901 | 0.030 | 438.900 |
| FisherZ        | 100 | 100 | All | 0.05     | 0.386 | 0.188 | 0.768 | 0.035 | 475.650 |
| FisherZ        | 100 | 100 | All | 0.08     | 0.317 | 0.202 | 0.560 | 0.044 | 523.950 |
| FisherZ        | 100 | 300 | All | 1.00E-04 | 0.979 | 0.200 | 0.995 | 0.038 | 311.650 |
| FisherZ        | 100 | 300 | All | 0.001    | 0.933 | 0.233 | 0.988 | 0.048 | 308.500 |
| FisherZ        | 100 | 300 | All | 0.01     | 0.729 | 0.280 | 0.952 | 0.062 | 328.100 |
| FisherZ        | 100 | 300 | All | 0.03     | 0.531 | 0.312 | 0.822 | 0.074 | 379.100 |
| FisherZ        | 100 | 300 | All | 0.05     | 0.428 | 0.330 | 0.688 | 0.079 | 432.650 |
| FisherZ        | 100 | 300 | All | 0.08     | 0.351 | 0.350 | 0.528 | 0.087 | 500.050 |
| FisherZ        | 100 | 500 | All | 1.00E-04 | 0.979 | 0.264 | 0.986 | 0.044 | 274.100 |
| FisherZ        | 100 | 500 | All | 0.001    | 0.946 | 0.292 | 0.925 | 0.049 | 272.600 |
| FisherZ        | 100 | 500 | All | 0.01     | 0.743 | 0.337 | 0.951 | 0.055 | 294.700 |
| FisherZ        | 100 | 500 | All | 0.03     | 0.540 | 0.374 | 0.826 | 0.068 | 348.850 |
| FisherZ        | 100 | 500 | All | 0.05     | 0.436 | 0.396 | 0.651 | 0.077 | 405.300 |
| FisherZ        | 100 | 500 | All | 0.08     | 0.344 | 0.412 | 0.482 | 0.091 | 486.450 |
| ChiSquare      | 100 | 100 | All | 1.00E-04 | 0.967 | 0.082 | NaN   | 0.000 | 388.700 |
| ChiSquare      | 100 | 100 | All | 0.001    | 0.919 | 0.103 | NaN   | 0.000 | 387.250 |

|                |     |     |     |          |       |       |       |       |         |
|----------------|-----|-----|-----|----------|-------|-------|-------|-------|---------|
| ChiSquare      | 100 | 100 | All | 0.01     | 0.906 | 0.119 | 0.875 | 0.001 | 384.750 |
| ChiSquare      | 100 | 100 | All | 0.03     | 0.907 | 0.131 | 0.625 | 0.001 | 382.900 |
| ChiSquare      | 100 | 100 | All | 0.05     | 0.902 | 0.141 | 0.600 | 0.002 | 382.050 |
| ChiSquare      | 100 | 100 | All | 0.08     | 0.839 | 0.153 | 0.475 | 0.002 | 384.950 |
| ChiSquare      | 100 | 300 | All | 1.00E-04 | 0.989 | 0.227 | 0.950 | 0.006 | 312.350 |
| ChiSquare      | 100 | 300 | All | 0.001    | 0.972 | 0.260 | 1.000 | 0.017 | 306.750 |
| ChiSquare      | 100 | 300 | All | 0.01     | 0.956 | 0.296 | 0.994 | 0.030 | 300.500 |
| ChiSquare      | 100 | 300 | All | 0.03     | 0.943 | 0.316 | 0.970 | 0.041 | 297.200 |
| ChiSquare      | 100 | 300 | All | 0.05     | 0.930 | 0.327 | 0.941 | 0.047 | 296.300 |
| ChiSquare      | 100 | 300 | All | 0.08     | 0.901 | 0.348 | 0.938 | 0.061 | 295.050 |
| ChiSquare      | 100 | 500 | All | 1.00E-04 | 0.981 | 0.316 | 0.990 | 0.022 | 270.950 |
| ChiSquare      | 100 | 500 | All | 0.001    | 0.961 | 0.346 | 0.985 | 0.038 | 266.400 |
| ChiSquare      | 100 | 500 | All | 0.01     | 0.944 | 0.385 | 0.966 | 0.062 | 259.700 |
| ChiSquare      | 100 | 500 | All | 0.03     | 0.932 | 0.416 | 0.946 | 0.085 | 253.850 |
| ChiSquare      | 100 | 500 | All | 0.05     | 0.913 | 0.429 | 0.928 | 0.093 | 254.300 |
| ChiSquare      | 100 | 500 | All | 0.08     | 0.889 | 0.445 | 0.896 | 0.111 | 253.250 |
| MultinomialLRT | 100 | 100 | All | 1.00E-04 | 0.914 | 0.126 | 0.938 | 0.007 | 382.600 |
| MultinomialLRT | 100 | 100 | All | 0.001    | 0.794 | 0.148 | 0.959 | 0.013 | 387.050 |
| MultinomialLRT | 100 | 100 | All | 0.01     | 0.589 | 0.188 | 0.808 | 0.022 | 413.250 |
| MultinomialLRT | 100 | 100 | All | 0.03     | 0.435 | 0.210 | 0.629 | 0.031 | 462.550 |
| MultinomialLRT | 100 | 100 | All | 0.05     | 0.378 | 0.225 | 0.490 | 0.038 | 497.000 |
| MultinomialLRT | 100 | 100 | All | 0.08     | 0.327 | 0.241 | 0.392 | 0.046 | 542.250 |
| MultinomialLRT | 100 | 300 | All | 1.00E-04 | 0.961 | 0.268 | 0.987 | 0.039 | 302.300 |
| MultinomialLRT | 100 | 300 | All | 0.001    | 0.877 | 0.302 | 0.958 | 0.052 | 304.950 |
| MultinomialLRT | 100 | 300 | All | 0.01     | 0.694 | 0.350 | 0.911 | 0.069 | 332.150 |
| MultinomialLRT | 100 | 300 | All | 0.03     | 0.531 | 0.387 | 0.709 | 0.085 | 387.700 |
| MultinomialLRT | 100 | 300 | All | 0.05     | 0.443 | 0.401 | 0.610 | 0.090 | 440.400 |
| MultinomialLRT | 100 | 300 | All | 0.08     | 0.375 | 0.422 | 0.491 | 0.110 | 503.800 |
| MultinomialLRT | 100 | 500 | All | 1.00E-04 | 0.969 | 0.363 | 0.983 | 0.050 | 259.950 |
| MultinomialLRT | 100 | 500 | All | 0.001    | 0.899 | 0.395 | 0.952 | 0.057 | 264.250 |
| MultinomialLRT | 100 | 500 | All | 0.01     | 0.696 | 0.446 | 0.861 | 0.074 | 299.700 |
| MultinomialLRT | 100 | 500 | All | 0.03     | 0.531 | 0.480 | 0.671 | 0.096 | 362.950 |
| MultinomialLRT | 100 | 500 | All | 0.05     | 0.444 | 0.498 | 0.574 | 0.107 | 422.000 |
| MultinomialLRT | 100 | 500 | All | 0.08     | 0.372 | 0.518 | 0.450 | 0.118 | 496.000 |
| CondGaussLRT   | 100 | 100 | All | 1.00E-04 | 0.972 | 0.120 | 0.944 | 0.006 | 380.600 |
| CondGaussLRT   | 100 | 100 | All | 0.001    | 0.906 | 0.137 | 0.983 | 0.012 | 380.500 |
| CondGaussLRT   | 100 | 100 | All | 0.01     | 0.896 | 0.149 | 0.979 | 0.018 | 378.100 |
| CondGaussLRT   | 100 | 100 | All | 0.03     | 0.885 | 0.152 | 0.978 | 0.022 | 377.650 |
| CondGaussLRT   | 100 | 100 | All | 0.05     | 0.856 | 0.163 | 0.970 | 0.028 | 377.200 |
| CondGaussLRT   | 100 | 100 | All | 0.08     | 0.817 | 0.170 | 0.956 | 0.032 | 379.200 |
| CondGaussLRT   | 100 | 300 | All | 1.00E-04 | 0.981 | 0.278 | 0.951 | 0.047 | 298.300 |
| CondGaussLRT   | 100 | 300 | All | 0.001    | 0.960 | 0.305 | 0.968 | 0.064 | 292.850 |
| CondGaussLRT   | 100 | 300 | All | 0.01     | 0.937 | 0.342 | 0.960 | 0.084 | 286.700 |
| CondGaussLRT   | 100 | 300 | All | 0.03     | 0.912 | 0.361 | 0.932 | 0.095 | 285.900 |
| CondGaussLRT   | 100 | 300 | All | 0.05     | 0.892 | 0.367 | 0.925 | 0.102 | 286.900 |

EVALUATION OF CAUSAL STRUCTURE LEARNING

|              |     |     |     |          |       |       |       |       |         |
|--------------|-----|-----|-----|----------|-------|-------|-------|-------|---------|
| CondGaussLRT | 100 | 300 | All | 0.08     | 0.868 | 0.371 | 0.891 | 0.105 | 290.250 |
| CondGaussLRT | 100 | 500 | All | 1.00E-04 | 0.985 | 0.383 | 0.964 | 0.083 | 250.850 |
| CondGaussLRT | 100 | 500 | All | 0.001    | 0.970 | 0.414 | 0.964 | 0.105 | 244.800 |
| CondGaussLRT | 100 | 500 | All | 0.01     | 0.942 | 0.447 | 0.931 | 0.128 | 241.100 |
| CondGaussLRT | 100 | 500 | All | 0.03     | 0.915 | 0.467 | 0.902 | 0.135 | 242.250 |
| CondGaussLRT | 100 | 500 | All | 0.05     | 0.894 | 0.472 | 0.888 | 0.138 | 244.800 |
| CondGaussLRT | 100 | 500 | All | 0.08     | 0.867 | 0.478 | 0.876 | 0.140 | 248.950 |

Table 6: All data for comparison of independence tests split by edge type with 50 and 100 variable, 1.5 density graphs generated using the Lee and Hastie method.

| Algorithm | Num Vars | SS  | Type | Parameter | AP    | AR    | AHP   | AHR   | SHD    |
|-----------|----------|-----|------|-----------|-------|-------|-------|-------|--------|
| FisherZ   | 50       | 100 | CC   | 1.00E-04  | 0.992 | 0.663 | 0.778 | 0.056 | 22.350 |
| FisherZ   | 50       | 100 | CC   | 0.001     | 0.993 | 0.719 | 0.909 | 0.091 | 20.600 |
| FisherZ   | 50       | 100 | CC   | 0.01      | 0.936 | 0.792 | 0.961 | 0.176 | 18.700 |
| FisherZ   | 50       | 100 | CC   | 0.03      | 0.860 | 0.816 | 0.954 | 0.217 | 19.900 |
| FisherZ   | 50       | 100 | CC   | 0.05      | 0.806 | 0.835 | 0.939 | 0.257 | 20.650 |
| FisherZ   | 50       | 100 | CC   | 0.08      | 0.750 | 0.845 | 0.884 | 0.298 | 22.350 |
| FisherZ   | 50       | 300 | CC   | 1.00E-04  | 0.974 | 0.816 | 0.922 | 0.203 | 18.900 |
| FisherZ   | 50       | 300 | CC   | 0.001     | 0.951 | 0.833 | 0.937 | 0.239 | 18.400 |
| FisherZ   | 50       | 300 | CC   | 0.01      | 0.909 | 0.880 | 0.916 | 0.334 | 17.250 |
| FisherZ   | 50       | 300 | CC   | 0.03      | 0.857 | 0.893 | 0.862 | 0.364 | 17.900 |
| FisherZ   | 50       | 300 | CC   | 0.05      | 0.802 | 0.909 | 0.872 | 0.404 | 19.000 |
| FisherZ   | 50       | 300 | CC   | 0.08      | 0.755 | 0.919 | 0.791 | 0.438 | 20.650 |
| FisherZ   | 50       | 500 | CC   | 1.00E-04  | 0.929 | 0.886 | 0.967 | 0.315 | 16.450 |
| FisherZ   | 50       | 500 | CC   | 0.001     | 0.925 | 0.904 | 0.978 | 0.370 | 15.300 |
| FisherZ   | 50       | 500 | CC   | 0.01      | 0.876 | 0.933 | 0.965 | 0.508 | 14.450 |
| FisherZ   | 50       | 500 | CC   | 0.03      | 0.823 | 0.938 | 0.886 | 0.536 | 15.650 |
| FisherZ   | 50       | 500 | CC   | 0.05      | 0.785 | 0.938 | 0.841 | 0.542 | 17.550 |
| FisherZ   | 50       | 500 | CC   | 0.08      | 0.730 | 0.940 | 0.811 | 0.577 | 20.100 |
| ChiSquare | 50       | 100 | CC   | 1.00E-04  | 0.963 | 0.256 | NaN   | 0.000 | 29.650 |
| ChiSquare | 50       | 100 | CC   | 0.001     | 0.973 | 0.300 | NaN   | 0.000 | 29.100 |
| ChiSquare | 50       | 100 | CC   | 0.01      | 0.961 | 0.428 | NaN   | 0.000 | 27.400 |
| ChiSquare | 50       | 100 | CC   | 0.03      | 0.967 | 0.460 | NaN   | 0.000 | 27.050 |
| ChiSquare | 50       | 100 | CC   | 0.05      | 0.968 | 0.466 | 0.667 | 0.005 | 26.900 |
| ChiSquare | 50       | 100 | CC   | 0.08      | 0.944 | 0.503 | 0.833 | 0.010 | 26.450 |
| ChiSquare | 50       | 300 | CC   | 1.00E-04  | 0.986 | 0.534 | NaN   | 0.000 | 27.400 |
| ChiSquare | 50       | 300 | CC   | 0.001     | 0.984 | 0.582 | 0.500 | 0.002 | 26.550 |
| ChiSquare | 50       | 300 | CC   | 0.01      | 0.972 | 0.620 | 0.500 | 0.008 | 25.950 |
| ChiSquare | 50       | 300 | CC   | 0.03      | 0.931 | 0.653 | 0.650 | 0.019 | 26.100 |
| ChiSquare | 50       | 300 | CC   | 0.05      | 0.941 | 0.661 | 0.550 | 0.016 | 25.800 |
| ChiSquare | 50       | 300 | CC   | 0.08      | 0.920 | 0.678 | 0.775 | 0.044 | 25.700 |
| ChiSquare | 50       | 500 | CC   | 1.00E-04  | 0.994 | 0.641 | 1.000 | 0.059 | 24.450 |
| ChiSquare | 50       | 500 | CC   | 0.001     | 0.985 | 0.680 | 1.000 | 0.079 | 23.600 |
| ChiSquare | 50       | 500 | CC   | 0.01      | 0.958 | 0.734 | 0.922 | 0.088 | 23.100 |

|                |    |     |    |          |       |       |       |       |        |
|----------------|----|-----|----|----------|-------|-------|-------|-------|--------|
| ChiSquare      | 50 | 500 | CC | 0.03     | 0.929 | 0.766 | 0.845 | 0.116 | 23.050 |
| ChiSquare      | 50 | 500 | CC | 0.05     | 0.906 | 0.778 | 0.962 | 0.150 | 22.550 |
| ChiSquare      | 50 | 500 | CC | 0.08     | 0.916 | 0.796 | 0.953 | 0.169 | 21.900 |
| MultinomialLRT | 50 | 100 | CC | 1.00E-04 | 0.995 | 0.615 | 0.900 | 0.027 | 23.400 |
| MultinomialLRT | 50 | 100 | CC | 0.001    | 0.996 | 0.697 | 0.955 | 0.091 | 20.900 |
| MultinomialLRT | 50 | 100 | CC | 0.01     | 0.955 | 0.761 | 0.944 | 0.146 | 19.650 |
| MultinomialLRT | 50 | 100 | CC | 0.03     | 0.922 | 0.784 | 0.872 | 0.209 | 19.000 |
| MultinomialLRT | 50 | 100 | CC | 0.05     | 0.884 | 0.821 | 0.850 | 0.234 | 19.050 |
| MultinomialLRT | 50 | 100 | CC | 0.08     | 0.851 | 0.851 | 0.860 | 0.311 | 18.550 |
| MultinomialLRT | 50 | 300 | CC | 1.00E-04 | 0.990 | 0.780 | 0.903 | 0.208 | 19.450 |
| MultinomialLRT | 50 | 300 | CC | 0.001    | 0.985 | 0.811 | 0.884 | 0.280 | 18.000 |
| MultinomialLRT | 50 | 300 | CC | 0.01     | 0.985 | 0.853 | 0.950 | 0.362 | 15.450 |
| MultinomialLRT | 50 | 300 | CC | 0.03     | 0.921 | 0.870 | 0.944 | 0.408 | 15.600 |
| MultinomialLRT | 50 | 300 | CC | 0.05     | 0.896 | 0.889 | 0.940 | 0.445 | 15.150 |
| MultinomialLRT | 50 | 300 | CC | 0.08     | 0.837 | 0.904 | 0.922 | 0.479 | 16.650 |
| MultinomialLRT | 50 | 500 | CC | 1.00E-04 | 0.987 | 0.863 | 0.971 | 0.429 | 14.350 |
| MultinomialLRT | 50 | 500 | CC | 0.001    | 0.988 | 0.899 | 0.971 | 0.521 | 11.900 |
| MultinomialLRT | 50 | 500 | CC | 0.01     | 0.971 | 0.919 | 0.987 | 0.578 | 10.450 |
| MultinomialLRT | 50 | 500 | CC | 0.03     | 0.949 | 0.919 | 0.985 | 0.596 | 10.600 |
| MultinomialLRT | 50 | 500 | CC | 0.05     | 0.890 | 0.930 | 0.966 | 0.624 | 11.650 |
| MultinomialLRT | 50 | 500 | CC | 0.08     | 0.852 | 0.936 | 0.940 | 0.642 | 12.750 |
| CondGaussLRT   | 50 | 100 | CC | 1.00E-04 | 0.995 | 0.598 | 1.000 | 0.023 | 23.800 |
| CondGaussLRT   | 50 | 100 | CC | 0.001    | 0.995 | 0.664 | 0.929 | 0.063 | 22.100 |
| CondGaussLRT   | 50 | 100 | CC | 0.01     | 0.959 | 0.745 | 0.951 | 0.122 | 20.050 |
| CondGaussLRT   | 50 | 100 | CC | 0.03     | 0.980 | 0.782 | 0.958 | 0.178 | 18.100 |
| CondGaussLRT   | 50 | 100 | CC | 0.05     | 0.965 | 0.805 | 0.962 | 0.202 | 17.550 |
| CondGaussLRT   | 50 | 100 | CC | 0.08     | 0.929 | 0.827 | 0.965 | 0.239 | 17.050 |
| CondGaussLRT   | 50 | 300 | CC | 1.00E-04 | 0.991 | 0.753 | 0.899 | 0.160 | 20.750 |
| CondGaussLRT   | 50 | 300 | CC | 0.001    | 0.987 | 0.779 | 0.865 | 0.181 | 19.950 |
| CondGaussLRT   | 50 | 300 | CC | 0.01     | 0.976 | 0.812 | 0.878 | 0.228 | 18.650 |
| CondGaussLRT   | 50 | 300 | CC | 0.03     | 0.993 | 0.837 | 0.931 | 0.260 | 17.300 |
| CondGaussLRT   | 50 | 300 | CC | 0.05     | 0.976 | 0.846 | 0.938 | 0.284 | 16.950 |
| CondGaussLRT   | 50 | 300 | CC | 0.08     | 0.957 | 0.861 | 0.946 | 0.302 | 16.450 |
| CondGaussLRT   | 50 | 500 | CC | 1.00E-04 | 0.989 | 0.853 | 0.984 | 0.321 | 16.050 |
| CondGaussLRT   | 50 | 500 | CC | 0.001    | 0.990 | 0.876 | 0.977 | 0.377 | 14.700 |
| CondGaussLRT   | 50 | 500 | CC | 0.01     | 0.987 | 0.896 | 0.980 | 0.428 | 13.200 |
| CondGaussLRT   | 50 | 500 | CC | 0.03     | 0.976 | 0.905 | 0.976 | 0.465 | 12.700 |
| CondGaussLRT   | 50 | 500 | CC | 0.05     | 0.961 | 0.913 | 0.975 | 0.476 | 12.650 |
| CondGaussLRT   | 50 | 500 | CC | 0.08     | 0.954 | 0.920 | 0.969 | 0.476 | 12.850 |
| FisherZ        | 50 | 100 | CD | 1.00E-04 | 1.000 | 0.161 | NaN   | 0.000 | 64.100 |
| FisherZ        | 50 | 100 | CD | 0.001    | 0.960 | 0.221 | 1.000 | 0.003 | 62.300 |
| FisherZ        | 50 | 100 | CD | 0.01     | 0.817 | 0.293 | 0.952 | 0.020 | 62.650 |
| FisherZ        | 50 | 100 | CD | 0.03     | 0.721 | 0.338 | 0.744 | 0.030 | 64.950 |
| FisherZ        | 50 | 100 | CD | 0.05     | 0.652 | 0.365 | 0.828 | 0.049 | 67.700 |
| FisherZ        | 50 | 100 | CD | 0.08     | 0.562 | 0.385 | 0.738 | 0.059 | 74.100 |

## EVALUATION OF CAUSAL STRUCTURE LEARNING

|                |    |     |    |          |       |       |       |       |        |
|----------------|----|-----|----|----------|-------|-------|-------|-------|--------|
| FisherZ        | 50 | 300 | CD | 1.00E-04 | 0.982 | 0.330 | 1.000 | 0.010 | 64.950 |
| FisherZ        | 50 | 300 | CD | 0.001    | 0.973 | 0.383 | 0.950 | 0.020 | 63.000 |
| FisherZ        | 50 | 300 | CD | 0.01     | 0.888 | 0.457 | 0.819 | 0.057 | 62.100 |
| FisherZ        | 50 | 300 | CD | 0.03     | 0.768 | 0.498 | 0.835 | 0.095 | 65.900 |
| FisherZ        | 50 | 300 | CD | 0.05     | 0.677 | 0.514 | 0.784 | 0.112 | 71.000 |
| FisherZ        | 50 | 300 | CD | 0.08     | 0.618 | 0.547 | 0.735 | 0.147 | 76.500 |
| FisherZ        | 50 | 500 | CD | 1.00E-04 | 0.968 | 0.386 | 0.958 | 0.037 | 57.850 |
| FisherZ        | 50 | 500 | CD | 0.001    | 0.943 | 0.445 | 0.973 | 0.061 | 55.850 |
| FisherZ        | 50 | 500 | CD | 0.01     | 0.869 | 0.520 | 0.876 | 0.100 | 55.850 |
| FisherZ        | 50 | 500 | CD | 0.03     | 0.753 | 0.552 | 0.717 | 0.146 | 61.100 |
| FisherZ        | 50 | 500 | CD | 0.05     | 0.687 | 0.585 | 0.650 | 0.173 | 65.800 |
| FisherZ        | 50 | 500 | CD | 0.08     | 0.622 | 0.615 | 0.648 | 0.206 | 71.700 |
| ChiSquare      | 50 | 100 | CD | 1.00E-04 | 1.000 | 0.107 | NaN   | 0.000 | 66.050 |
| ChiSquare      | 50 | 100 | CD | 0.001    | 1.000 | 0.163 | NaN   | 0.000 | 64.700 |
| ChiSquare      | 50 | 100 | CD | 0.01     | 0.978 | 0.228 | NaN   | 0.000 | 62.550 |
| ChiSquare      | 50 | 100 | CD | 0.03     | 0.929 | 0.254 | NaN   | 0.000 | 61.850 |
| ChiSquare      | 50 | 100 | CD | 0.05     | 0.957 | 0.279 | 0.250 | 0.001 | 60.950 |
| ChiSquare      | 50 | 100 | CD | 0.08     | 0.955 | 0.311 | 0.000 | 0.000 | 60.450 |
| ChiSquare      | 50 | 300 | CD | 1.00E-04 | 0.997 | 0.338 | 0.500 | 0.005 | 64.700 |
| ChiSquare      | 50 | 300 | CD | 0.001    | 0.997 | 0.378 | 1.000 | 0.005 | 63.250 |
| ChiSquare      | 50 | 300 | CD | 0.01     | 0.973 | 0.439 | 0.556 | 0.007 | 61.850 |
| ChiSquare      | 50 | 300 | CD | 0.03     | 0.969 | 0.480 | 0.738 | 0.012 | 60.250 |
| ChiSquare      | 50 | 300 | CD | 0.05     | 0.982 | 0.502 | 0.833 | 0.022 | 58.950 |
| ChiSquare      | 50 | 300 | CD | 0.08     | 0.974 | 0.547 | 0.654 | 0.033 | 57.650 |
| ChiSquare      | 50 | 500 | CD | 1.00E-04 | 0.997 | 0.429 | NaN   | 0.000 | 57.200 |
| ChiSquare      | 50 | 500 | CD | 0.001    | 0.991 | 0.485 | 1.000 | 0.002 | 55.300 |
| ChiSquare      | 50 | 500 | CD | 0.01     | 0.987 | 0.552 | 0.667 | 0.006 | 52.950 |
| ChiSquare      | 50 | 500 | CD | 0.03     | 0.987 | 0.595 | 0.833 | 0.009 | 51.450 |
| ChiSquare      | 50 | 500 | CD | 0.05     | 0.977 | 0.617 | 1.000 | 0.019 | 50.600 |
| ChiSquare      | 50 | 500 | CD | 0.08     | 0.968 | 0.643 | 0.773 | 0.033 | 49.850 |
| MultinomialLRT | 50 | 100 | CD | 1.00E-04 | 0.996 | 0.412 | NaN   | 0.000 | 56.800 |
| MultinomialLRT | 50 | 100 | CD | 0.001    | 0.976 | 0.487 | 0.571 | 0.007 | 54.100 |
| MultinomialLRT | 50 | 100 | CD | 0.01     | 0.861 | 0.586 | 0.792 | 0.025 | 54.500 |
| MultinomialLRT | 50 | 100 | CD | 0.03     | 0.771 | 0.641 | 0.806 | 0.050 | 57.350 |
| MultinomialLRT | 50 | 100 | CD | 0.05     | 0.730 | 0.668 | 0.644 | 0.070 | 59.700 |
| MultinomialLRT | 50 | 100 | CD | 0.08     | 0.668 | 0.686 | 0.615 | 0.090 | 65.350 |
| MultinomialLRT | 50 | 300 | CD | 1.00E-04 | 0.998 | 0.613 | 1.000 | 0.052 | 52.850 |
| MultinomialLRT | 50 | 300 | CD | 0.001    | 0.994 | 0.680 | 0.922 | 0.087 | 49.800 |
| MultinomialLRT | 50 | 300 | CD | 0.01     | 0.943 | 0.749 | 0.981 | 0.152 | 46.700 |
| MultinomialLRT | 50 | 300 | CD | 0.03     | 0.857 | 0.783 | 0.935 | 0.203 | 48.900 |
| MultinomialLRT | 50 | 300 | CD | 0.05     | 0.814 | 0.800 | 0.855 | 0.234 | 50.350 |
| MultinomialLRT | 50 | 300 | CD | 0.08     | 0.752 | 0.811 | 0.809 | 0.262 | 55.250 |
| MultinomialLRT | 50 | 500 | CD | 1.00E-04 | 0.993 | 0.742 | 0.976 | 0.139 | 41.250 |
| MultinomialLRT | 50 | 500 | CD | 0.001    | 0.982 | 0.778 | 0.974 | 0.184 | 38.800 |
| MultinomialLRT | 50 | 500 | CD | 0.01     | 0.910 | 0.832 | 0.965 | 0.266 | 37.950 |

|                |    |     |    |          |       |       |       |       |        |
|----------------|----|-----|----|----------|-------|-------|-------|-------|--------|
| MultinomialLRT | 50 | 500 | CD | 0.03     | 0.858 | 0.865 | 0.976 | 0.316 | 38.650 |
| MultinomialLRT | 50 | 500 | CD | 0.05     | 0.807 | 0.877 | 0.898 | 0.350 | 42.150 |
| MultinomialLRT | 50 | 500 | CD | 0.08     | 0.746 | 0.892 | 0.890 | 0.395 | 47.000 |
| CondGaussLRT   | 50 | 100 | CD | 1.00E-04 | 1.000 | 0.175 | NaN   | 0.000 | 65.150 |
| CondGaussLRT   | 50 | 100 | CD | 0.001    | 1.000 | 0.188 | 1.000 | 0.002 | 64.800 |
| CondGaussLRT   | 50 | 100 | CD | 0.01     | 0.923 | 0.156 | 1.000 | 0.006 | 65.350 |
| CondGaussLRT   | 50 | 100 | CD | 0.03     | 0.983 | 0.144 | 1.000 | 0.005 | 64.950 |
| CondGaussLRT   | 50 | 100 | CD | 0.05     | 0.983 | 0.130 | 1.000 | 0.009 | 65.050 |
| CondGaussLRT   | 50 | 100 | CD | 0.08     | 0.963 | 0.138 | 1.000 | 0.009 | 64.950 |
| CondGaussLRT   | 50 | 300 | CD | 1.00E-04 | 1.000 | 0.367 | 1.000 | 0.002 | 64.050 |
| CondGaussLRT   | 50 | 300 | CD | 0.001    | 0.991 | 0.378 | 1.000 | 0.003 | 64.300 |
| CondGaussLRT   | 50 | 300 | CD | 0.01     | 0.980 | 0.381 | 1.000 | 0.016 | 64.350 |
| CondGaussLRT   | 50 | 300 | CD | 0.03     | 0.955 | 0.381 | 1.000 | 0.028 | 64.950 |
| CondGaussLRT   | 50 | 300 | CD | 0.05     | 0.930 | 0.376 | 0.962 | 0.046 | 65.400 |
| CondGaussLRT   | 50 | 300 | CD | 0.08     | 0.934 | 0.372 | 0.958 | 0.049 | 65.300 |
| CondGaussLRT   | 50 | 500 | CD | 1.00E-04 | 1.000 | 0.475 | 1.000 | 0.018 | 55.100 |
| CondGaussLRT   | 50 | 500 | CD | 0.001    | 1.000 | 0.482 | 0.972 | 0.025 | 54.900 |
| CondGaussLRT   | 50 | 500 | CD | 0.01     | 0.982 | 0.481 | 0.946 | 0.036 | 55.250 |
| CondGaussLRT   | 50 | 500 | CD | 0.03     | 0.960 | 0.488 | 0.914 | 0.054 | 55.150 |
| CondGaussLRT   | 50 | 500 | CD | 0.05     | 0.956 | 0.491 | 0.892 | 0.055 | 55.100 |
| CondGaussLRT   | 50 | 500 | CD | 0.08     | 0.930 | 0.482 | 0.912 | 0.062 | 56.300 |
| FisherZ        | 50 | 100 | DD | 1.00E-04 | 1.000 | 0.099 | NaN   | 0.000 | 30.000 |
| FisherZ        | 50 | 100 | DD | 0.001    | 0.938 | 0.137 | 1.000 | 0.003 | 29.450 |
| FisherZ        | 50 | 100 | DD | 0.01     | 0.690 | 0.211 | 1.000 | 0.012 | 30.250 |
| FisherZ        | 50 | 100 | DD | 0.03     | 0.587 | 0.259 | 0.600 | 0.014 | 32.800 |
| FisherZ        | 50 | 100 | DD | 0.05     | 0.487 | 0.275 | 0.800 | 0.018 | 35.900 |
| FisherZ        | 50 | 100 | DD | 0.08     | 0.405 | 0.319 | 0.561 | 0.070 | 39.350 |
| FisherZ        | 50 | 300 | DD | 1.00E-04 | 0.963 | 0.195 | NaN   | 0.000 | 35.950 |
| FisherZ        | 50 | 300 | DD | 0.001    | 0.959 | 0.252 | 1.000 | 0.002 | 35.000 |
| FisherZ        | 50 | 300 | DD | 0.01     | 0.804 | 0.333 | 0.708 | 0.010 | 35.850 |
| FisherZ        | 50 | 300 | DD | 0.03     | 0.638 | 0.390 | 0.688 | 0.026 | 39.250 |
| FisherZ        | 50 | 300 | DD | 0.05     | 0.558 | 0.421 | 0.674 | 0.037 | 42.200 |
| FisherZ        | 50 | 300 | DD | 0.08     | 0.469 | 0.447 | 0.363 | 0.050 | 48.350 |
| FisherZ        | 50 | 500 | DD | 1.00E-04 | 0.965 | 0.286 | 0.000 | 0.000 | 31.550 |
| FisherZ        | 50 | 500 | DD | 0.001    | 0.943 | 0.383 | 0.833 | 0.007 | 30.300 |
| FisherZ        | 50 | 500 | DD | 0.01     | 0.853 | 0.482 | 0.688 | 0.019 | 30.400 |
| FisherZ        | 50 | 500 | DD | 0.03     | 0.705 | 0.539 | 0.604 | 0.061 | 33.300 |
| FisherZ        | 50 | 500 | DD | 0.05     | 0.643 | 0.565 | 0.607 | 0.103 | 35.650 |
| FisherZ        | 50 | 500 | DD | 0.08     | 0.562 | 0.612 | 0.560 | 0.117 | 40.850 |
| ChiSquare      | 50 | 100 | DD | 1.00E-04 | 1.000 | 0.254 | NaN   | 0.000 | 28.350 |
| ChiSquare      | 50 | 100 | DD | 0.001    | 1.000 | 0.308 | NaN   | 0.000 | 27.850 |
| ChiSquare      | 50 | 100 | DD | 0.01     | 0.961 | 0.406 | NaN   | 0.000 | 26.700 |
| ChiSquare      | 50 | 100 | DD | 0.03     | 0.943 | 0.445 | NaN   | 0.000 | 26.250 |
| ChiSquare      | 50 | 100 | DD | 0.05     | 0.947 | 0.472 | NaN   | 0.000 | 25.750 |
| ChiSquare      | 50 | 100 | DD | 0.08     | 0.911 | 0.491 | 0.000 | 0.000 | 26.100 |



## EVALUATION OF CAUSAL STRUCTURE LEARNING

|                |    |     |    |          |       |       |       |       |        |
|----------------|----|-----|----|----------|-------|-------|-------|-------|--------|
| ChiSquare      | 50 | 300 | DD | 1.00E-04 | 0.994 | 0.490 | 0.000 | 0.000 | 31.000 |
| ChiSquare      | 50 | 300 | DD | 0.001    | 0.996 | 0.532 | NaN   | 0.000 | 29.850 |
| ChiSquare      | 50 | 300 | DD | 0.01     | 0.987 | 0.610 | 1.000 | 0.009 | 28.450 |
| ChiSquare      | 50 | 300 | DD | 0.03     | 0.960 | 0.645 | 0.500 | 0.009 | 28.600 |
| ChiSquare      | 50 | 300 | DD | 0.05     | 0.953 | 0.700 | 0.750 | 0.017 | 27.650 |
| ChiSquare      | 50 | 300 | DD | 0.08     | 0.963 | 0.717 | 0.850 | 0.043 | 26.700 |
| ChiSquare      | 50 | 500 | DD | 1.00E-04 | 0.993 | 0.630 | NaN   | 0.000 | 25.650 |
| ChiSquare      | 50 | 500 | DD | 0.001    | 0.989 | 0.681 | NaN   | 0.000 | 24.750 |
| ChiSquare      | 50 | 500 | DD | 0.01     | 0.985 | 0.746 | 0.500 | 0.002 | 23.550 |
| ChiSquare      | 50 | 500 | DD | 0.03     | 0.972 | 0.802 | 1.000 | 0.014 | 22.950 |
| ChiSquare      | 50 | 500 | DD | 0.05     | 0.977 | 0.822 | 0.933 | 0.020 | 22.350 |
| ChiSquare      | 50 | 500 | DD | 0.08     | 0.970 | 0.852 | 0.660 | 0.025 | 21.950 |
| MultinomialLRT | 50 | 100 | DD | 1.00E-04 | 0.985 | 0.425 | NaN   | 0.000 | 26.150 |
| MultinomialLRT | 50 | 100 | DD | 0.001    | 0.926 | 0.511 | 0.667 | 0.007 | 25.400 |
| MultinomialLRT | 50 | 100 | DD | 0.01     | 0.772 | 0.578 | 0.778 | 0.034 | 27.350 |
| MultinomialLRT | 50 | 100 | DD | 0.03     | 0.665 | 0.626 | 0.652 | 0.060 | 30.750 |
| MultinomialLRT | 50 | 100 | DD | 0.05     | 0.575 | 0.641 | 0.584 | 0.114 | 33.500 |
| MultinomialLRT | 50 | 100 | DD | 0.08     | 0.523 | 0.690 | 0.496 | 0.138 | 37.600 |
| MultinomialLRT | 50 | 300 | DD | 1.00E-04 | 1.000 | 0.730 | 1.000 | 0.058 | 24.900 |
| MultinomialLRT | 50 | 300 | DD | 0.001    | 0.989 | 0.793 | 0.964 | 0.095 | 23.400 |
| MultinomialLRT | 50 | 300 | DD | 0.01     | 0.924 | 0.850 | 1.000 | 0.145 | 23.100 |
| MultinomialLRT | 50 | 300 | DD | 0.03     | 0.822 | 0.877 | 0.917 | 0.227 | 24.650 |
| MultinomialLRT | 50 | 300 | DD | 0.05     | 0.755 | 0.893 | 0.818 | 0.265 | 26.900 |
| MultinomialLRT | 50 | 300 | DD | 0.08     | 0.677 | 0.911 | 0.762 | 0.288 | 31.300 |
| MultinomialLRT | 50 | 500 | DD | 1.00E-04 | 0.997 | 0.869 | 0.942 | 0.085 | 19.600 |
| MultinomialLRT | 50 | 500 | DD | 0.001    | 0.997 | 0.910 | 0.875 | 0.131 | 18.050 |
| MultinomialLRT | 50 | 500 | DD | 0.01     | 0.922 | 0.949 | 0.935 | 0.214 | 17.400 |
| MultinomialLRT | 50 | 500 | DD | 0.03     | 0.813 | 0.957 | 0.934 | 0.290 | 20.250 |
| MultinomialLRT | 50 | 500 | DD | 0.05     | 0.724 | 0.961 | 0.900 | 0.354 | 24.100 |
| MultinomialLRT | 50 | 500 | DD | 0.08     | 0.660 | 0.970 | 0.815 | 0.367 | 28.550 |
| CondGaussLRT   | 50 | 100 | DD | 1.00E-04 | 1.000 | 0.160 | NaN   | 0.000 | 29.600 |
| CondGaussLRT   | 50 | 100 | DD | 0.001    | 1.000 | 0.220 | 1.000 | 0.005 | 28.900 |
| CondGaussLRT   | 50 | 100 | DD | 0.01     | 1.000 | 0.231 | 1.000 | 0.008 | 28.500 |
| CondGaussLRT   | 50 | 100 | DD | 0.03     | 1.000 | 0.253 | 1.000 | 0.005 | 28.200 |
| CondGaussLRT   | 50 | 100 | DD | 0.05     | 1.000 | 0.238 | 1.000 | 0.005 | 28.300 |
| CondGaussLRT   | 50 | 100 | DD | 0.08     | 1.000 | 0.264 | 1.000 | 0.011 | 28.000 |
| CondGaussLRT   | 50 | 300 | DD | 1.00E-04 | 1.000 | 0.366 | NaN   | 0.000 | 33.350 |
| CondGaussLRT   | 50 | 300 | DD | 0.001    | 1.000 | 0.350 | NaN   | 0.000 | 33.850 |
| CondGaussLRT   | 50 | 300 | DD | 0.01     | 0.984 | 0.341 | NaN   | 0.000 | 34.300 |
| CondGaussLRT   | 50 | 300 | DD | 0.03     | 0.979 | 0.336 | 1.000 | 0.003 | 34.500 |
| CondGaussLRT   | 50 | 300 | DD | 0.05     | 0.983 | 0.324 | 1.000 | 0.003 | 34.500 |
| CondGaussLRT   | 50 | 300 | DD | 0.08     | 0.973 | 0.334 | NaN   | 0.000 | 34.500 |
| CondGaussLRT   | 50 | 500 | DD | 1.00E-04 | 1.000 | 0.433 | NaN   | 0.000 | 29.400 |
| CondGaussLRT   | 50 | 500 | DD | 0.001    | 1.000 | 0.464 | 1.000 | 0.002 | 28.850 |
| CondGaussLRT   | 50 | 500 | DD | 0.01     | 0.992 | 0.455 | 1.000 | 0.004 | 29.300 |

|                |    |     |     |          |       |       |       |       |         |
|----------------|----|-----|-----|----------|-------|-------|-------|-------|---------|
| CondGaussLRT   | 50 | 500 | DD  | 0.03     | 0.994 | 0.433 | 0.500 | 0.005 | 29.600  |
| CondGaussLRT   | 50 | 500 | DD  | 0.05     | 0.994 | 0.431 | 0.500 | 0.007 | 29.600  |
| CondGaussLRT   | 50 | 500 | DD  | 0.08     | 0.993 | 0.417 | 0.625 | 0.009 | 29.750  |
| FisherZ        | 50 | 100 | All | 1.00E-04 | 0.992 | 0.272 | 0.778 | 0.014 | 116.450 |
| FisherZ        | 50 | 100 | All | 0.001    | 0.981 | 0.327 | 0.917 | 0.025 | 112.350 |
| FisherZ        | 50 | 100 | All | 0.01     | 0.857 | 0.402 | 0.960 | 0.058 | 111.600 |
| FisherZ        | 50 | 100 | All | 0.03     | 0.744 | 0.441 | 0.869 | 0.074 | 117.650 |
| FisherZ        | 50 | 100 | All | 0.05     | 0.671 | 0.468 | 0.916 | 0.095 | 124.250 |
| FisherZ        | 50 | 100 | All | 0.08     | 0.593 | 0.490 | 0.787 | 0.129 | 135.800 |
| FisherZ        | 50 | 300 | All | 1.00E-04 | 0.978 | 0.405 | 0.932 | 0.055 | 119.800 |
| FisherZ        | 50 | 300 | All | 0.001    | 0.965 | 0.450 | 0.949 | 0.069 | 116.400 |
| FisherZ        | 50 | 300 | All | 0.01     | 0.884 | 0.521 | 0.890 | 0.111 | 115.200 |
| FisherZ        | 50 | 300 | All | 0.03     | 0.772 | 0.561 | 0.832 | 0.141 | 123.050 |
| FisherZ        | 50 | 300 | All | 0.05     | 0.695 | 0.581 | 0.802 | 0.163 | 132.200 |
| FisherZ        | 50 | 300 | All | 0.08     | 0.624 | 0.607 | 0.732 | 0.193 | 145.500 |
| FisherZ        | 50 | 500 | All | 1.00E-04 | 0.949 | 0.481 | 0.960 | 0.094 | 105.850 |
| FisherZ        | 50 | 500 | All | 0.001    | 0.934 | 0.539 | 0.966 | 0.122 | 101.450 |
| FisherZ        | 50 | 500 | All | 0.01     | 0.867 | 0.610 | 0.912 | 0.174 | 100.700 |
| FisherZ        | 50 | 500 | All | 0.03     | 0.764 | 0.641 | 0.795 | 0.215 | 110.050 |
| FisherZ        | 50 | 500 | All | 0.05     | 0.703 | 0.664 | 0.755 | 0.239 | 119.000 |
| FisherZ        | 50 | 500 | All | 0.08     | 0.636 | 0.691 | 0.722 | 0.270 | 132.650 |
| ChiSquare      | 50 | 100 | All | 1.00E-04 | 0.988 | 0.177 | NaN   | 0.000 | 124.050 |
| ChiSquare      | 50 | 100 | All | 0.001    | 0.992 | 0.225 | NaN   | 0.000 | 121.650 |
| ChiSquare      | 50 | 100 | All | 0.01     | 0.968 | 0.312 | NaN   | 0.000 | 116.650 |
| ChiSquare      | 50 | 100 | All | 0.03     | 0.946 | 0.345 | NaN   | 0.000 | 115.150 |
| ChiSquare      | 50 | 100 | All | 0.05     | 0.953 | 0.367 | 0.500 | 0.002 | 113.600 |
| ChiSquare      | 50 | 100 | All | 0.08     | 0.932 | 0.397 | 0.500 | 0.002 | 113.000 |
| ChiSquare      | 50 | 300 | All | 1.00E-04 | 0.993 | 0.416 | 0.500 | 0.002 | 123.100 |
| ChiSquare      | 50 | 300 | All | 0.001    | 0.993 | 0.461 | 0.750 | 0.003 | 119.650 |
| ChiSquare      | 50 | 300 | All | 0.01     | 0.974 | 0.523 | 0.750 | 0.008 | 116.250 |
| ChiSquare      | 50 | 300 | All | 0.03     | 0.953 | 0.559 | 0.642 | 0.013 | 114.950 |
| ChiSquare      | 50 | 300 | All | 0.05     | 0.959 | 0.586 | 0.708 | 0.020 | 112.400 |
| ChiSquare      | 50 | 300 | All | 0.08     | 0.955 | 0.619 | 0.732 | 0.038 | 110.050 |
| ChiSquare      | 50 | 500 | All | 1.00E-04 | 0.996 | 0.528 | 1.000 | 0.011 | 107.300 |
| ChiSquare      | 50 | 500 | All | 0.001    | 0.988 | 0.579 | 1.000 | 0.015 | 103.650 |
| ChiSquare      | 50 | 500 | All | 0.01     | 0.980 | 0.643 | 0.867 | 0.020 | 99.600  |
| ChiSquare      | 50 | 500 | All | 0.03     | 0.968 | 0.685 | 0.897 | 0.031 | 97.450  |
| ChiSquare      | 50 | 500 | All | 0.05     | 0.958 | 0.705 | 0.958 | 0.047 | 95.500  |
| ChiSquare      | 50 | 500 | All | 0.08     | 0.954 | 0.731 | 0.882 | 0.060 | 93.700  |
| MultinomialLRT | 50 | 100 | All | 1.00E-04 | 0.993 | 0.456 | 0.900 | 0.007 | 106.350 |
| MultinomialLRT | 50 | 100 | All | 0.001    | 0.970 | 0.537 | 0.910 | 0.027 | 100.400 |
| MultinomialLRT | 50 | 100 | All | 0.01     | 0.862 | 0.616 | 0.801 | 0.057 | 101.500 |
| MultinomialLRT | 50 | 100 | All | 0.03     | 0.773 | 0.661 | 0.788 | 0.090 | 107.100 |
| MultinomialLRT | 50 | 100 | All | 0.05     | 0.724 | 0.693 | 0.692 | 0.120 | 112.250 |
| MultinomialLRT | 50 | 100 | All | 0.08     | 0.667 | 0.721 | 0.674 | 0.161 | 121.500 |

## EVALUATION OF CAUSAL STRUCTURE LEARNING

|                |     |     |     |          |       |       |       |       |         |
|----------------|-----|-----|-----|----------|-------|-------|-------|-------|---------|
| MultinomialLRT | 50  | 300 | All | 1.00E-04 | 0.996 | 0.680 | 0.939 | 0.091 | 97.200  |
| MultinomialLRT | 50  | 300 | All | 0.001    | 0.990 | 0.737 | 0.924 | 0.135 | 91.200  |
| MultinomialLRT | 50  | 300 | All | 0.01     | 0.944 | 0.796 | 0.971 | 0.198 | 85.250  |
| MultinomialLRT | 50  | 300 | All | 0.03     | 0.860 | 0.826 | 0.931 | 0.255 | 89.150  |
| MultinomialLRT | 50  | 300 | All | 0.05     | 0.815 | 0.843 | 0.864 | 0.288 | 92.400  |
| MultinomialLRT | 50  | 300 | All | 0.08     | 0.748 | 0.858 | 0.821 | 0.317 | 103.200 |
| MultinomialLRT | 50  | 500 | All | 1.00E-04 | 0.992 | 0.803 | 0.968 | 0.189 | 75.200  |
| MultinomialLRT | 50  | 500 | All | 0.001    | 0.985 | 0.840 | 0.970 | 0.246 | 68.750  |
| MultinomialLRT | 50  | 500 | All | 0.01     | 0.925 | 0.883 | 0.972 | 0.325 | 65.800  |
| MultinomialLRT | 50  | 500 | All | 0.03     | 0.863 | 0.901 | 0.965 | 0.374 | 69.500  |
| MultinomialLRT | 50  | 500 | All | 0.05     | 0.800 | 0.912 | 0.919 | 0.414 | 77.900  |
| MultinomialLRT | 50  | 500 | All | 0.08     | 0.742 | 0.923 | 0.885 | 0.445 | 88.300  |
| CondGaussLRT   | 50  | 100 | All | 1.00E-04 | 0.997 | 0.272 | 1.000 | 0.005 | 118.550 |
| CondGaussLRT   | 50  | 100 | All | 0.001    | 0.997 | 0.310 | 0.938 | 0.018 | 115.800 |
| CondGaussLRT   | 50  | 100 | All | 0.01     | 0.956 | 0.319 | 0.955 | 0.035 | 113.900 |
| CondGaussLRT   | 50  | 100 | All | 0.03     | 0.983 | 0.327 | 0.961 | 0.048 | 111.250 |
| CondGaussLRT   | 50  | 100 | All | 0.05     | 0.973 | 0.326 | 0.964 | 0.058 | 110.900 |
| CondGaussLRT   | 50  | 100 | All | 0.08     | 0.952 | 0.340 | 0.968 | 0.068 | 110.000 |
| CondGaussLRT   | 50  | 300 | All | 1.00E-04 | 0.996 | 0.452 | 0.899 | 0.039 | 118.150 |
| CondGaussLRT   | 50  | 300 | All | 0.001    | 0.988 | 0.459 | 0.865 | 0.045 | 118.100 |
| CondGaussLRT   | 50  | 300 | All | 0.01     | 0.980 | 0.466 | 0.885 | 0.063 | 117.300 |
| CondGaussLRT   | 50  | 300 | All | 0.03     | 0.968 | 0.472 | 0.935 | 0.078 | 116.750 |
| CondGaussLRT   | 50  | 300 | All | 0.05     | 0.953 | 0.467 | 0.929 | 0.093 | 116.850 |
| CondGaussLRT   | 50  | 300 | All | 0.08     | 0.949 | 0.470 | 0.931 | 0.099 | 116.250 |
| CondGaussLRT   | 50  | 500 | All | 1.00E-04 | 0.995 | 0.554 | 0.984 | 0.082 | 100.550 |
| CondGaussLRT   | 50  | 500 | All | 0.001    | 0.995 | 0.572 | 0.970 | 0.099 | 98.450  |
| CondGaussLRT   | 50  | 500 | All | 0.01     | 0.984 | 0.573 | 0.968 | 0.118 | 97.750  |
| CondGaussLRT   | 50  | 500 | All | 0.03     | 0.966 | 0.574 | 0.953 | 0.137 | 97.450  |
| CondGaussLRT   | 50  | 500 | All | 0.05     | 0.961 | 0.576 | 0.934 | 0.141 | 97.350  |
| CondGaussLRT   | 50  | 500 | All | 0.08     | 0.941 | 0.571 | 0.940 | 0.145 | 98.900  |
| FisherZ        | 100 | 100 | CC  | 1.00E-04 | 0.991 | 0.609 | 0.975 | 0.048 | 45.500  |
| FisherZ        | 100 | 100 | CC  | 0.001    | 0.986 | 0.661 | 0.970 | 0.077 | 42.700  |
| FisherZ        | 100 | 100 | CC  | 0.01     | 0.904 | 0.738 | 0.980 | 0.144 | 41.300  |
| FisherZ        | 100 | 100 | CC  | 0.03     | 0.839 | 0.773 | 0.921 | 0.201 | 42.150  |
| FisherZ        | 100 | 100 | CC  | 0.05     | 0.777 | 0.802 | 0.850 | 0.242 | 44.350  |
| FisherZ        | 100 | 100 | CC  | 0.08     | 0.697 | 0.827 | 0.816 | 0.302 | 49.800  |
| FisherZ        | 100 | 300 | CC  | 1.00E-04 | 0.985 | 0.845 | 0.971 | 0.224 | 33.450  |
| FisherZ        | 100 | 300 | CC  | 0.001    | 0.968 | 0.876 | 0.981 | 0.309 | 29.650  |
| FisherZ        | 100 | 300 | CC  | 0.01     | 0.912 | 0.909 | 0.975 | 0.379 | 28.850  |
| FisherZ        | 100 | 300 | CC  | 0.03     | 0.812 | 0.922 | 0.948 | 0.436 | 32.850  |
| FisherZ        | 100 | 300 | CC  | 0.05     | 0.752 | 0.929 | 0.916 | 0.460 | 37.600  |
| FisherZ        | 100 | 300 | CC  | 0.08     | 0.688 | 0.932 | 0.767 | 0.469 | 45.250  |
| FisherZ        | 100 | 500 | CC  | 1.00E-04 | 0.982 | 0.902 | 0.980 | 0.430 | 26.900  |
| FisherZ        | 100 | 500 | CC  | 0.001    | 0.976 | 0.918 | 0.977 | 0.478 | 25.000  |
| FisherZ        | 100 | 500 | CC  | 0.01     | 0.929 | 0.946 | 0.969 | 0.539 | 24.900  |

|                |     |     |    |          |       |       |       |       |        |
|----------------|-----|-----|----|----------|-------|-------|-------|-------|--------|
| FisherZ        | 100 | 500 | CC | 0.03     | 0.870 | 0.955 | 0.926 | 0.565 | 29.050 |
| FisherZ        | 100 | 500 | CC | 0.05     | 0.822 | 0.956 | 0.908 | 0.584 | 33.200 |
| FisherZ        | 100 | 500 | CC | 0.08     | 0.744 | 0.958 | 0.874 | 0.600 | 41.400 |
| ChiSquare      | 100 | 100 | CC | 1.00E-04 | 0.969 | 0.250 | NaN   | 0.000 | 57.900 |
| ChiSquare      | 100 | 100 | CC | 0.001    | 0.954 | 0.291 | NaN   | 0.000 | 56.750 |
| ChiSquare      | 100 | 100 | CC | 0.01     | 0.919 | 0.355 | NaN   | 0.000 | 56.150 |
| ChiSquare      | 100 | 100 | CC | 0.03     | 0.942 | 0.421 | 0.750 | 0.005 | 53.950 |
| ChiSquare      | 100 | 100 | CC | 0.05     | 0.949 | 0.434 | 0.625 | 0.007 | 53.300 |
| ChiSquare      | 100 | 100 | CC | 0.08     | 0.933 | 0.469 | 0.625 | 0.007 | 52.600 |
| ChiSquare      | 100 | 300 | CC | 1.00E-04 | 0.986 | 0.490 | 1.000 | 0.002 | 53.700 |
| ChiSquare      | 100 | 300 | CC | 0.001    | 0.982 | 0.533 | 1.000 | 0.002 | 52.550 |
| ChiSquare      | 100 | 300 | CC | 0.01     | 0.957 | 0.594 | 1.000 | 0.015 | 50.950 |
| ChiSquare      | 100 | 300 | CC | 0.03     | 0.949 | 0.626 | 0.981 | 0.043 | 49.300 |
| ChiSquare      | 100 | 300 | CC | 0.05     | 0.939 | 0.647 | 0.883 | 0.046 | 49.050 |
| ChiSquare      | 100 | 300 | CC | 0.08     | 0.948 | 0.671 | 0.910 | 0.062 | 47.400 |
| ChiSquare      | 100 | 500 | CC | 1.00E-04 | 0.979 | 0.600 | 1.000 | 0.020 | 53.200 |
| ChiSquare      | 100 | 500 | CC | 0.001    | 0.979 | 0.643 | 1.000 | 0.029 | 51.500 |
| ChiSquare      | 100 | 500 | CC | 0.01     | 0.962 | 0.703 | 0.933 | 0.073 | 48.650 |
| ChiSquare      | 100 | 500 | CC | 0.03     | 0.954 | 0.732 | 0.979 | 0.101 | 47.000 |
| ChiSquare      | 100 | 500 | CC | 0.05     | 0.936 | 0.756 | 0.970 | 0.129 | 46.450 |
| ChiSquare      | 100 | 500 | CC | 0.08     | 0.924 | 0.765 | 0.949 | 0.143 | 46.300 |
| MultinomialLRT | 100 | 100 | CC | 1.00E-04 | 0.997 | 0.587 | 1.000 | 0.042 | 46.150 |
| MultinomialLRT | 100 | 100 | CC | 0.001    | 1.000 | 0.656 | 0.992 | 0.078 | 42.250 |
| MultinomialLRT | 100 | 100 | CC | 0.01     | 0.943 | 0.717 | 0.985 | 0.133 | 40.450 |
| MultinomialLRT | 100 | 100 | CC | 0.03     | 0.895 | 0.767 | 0.967 | 0.193 | 39.300 |
| MultinomialLRT | 100 | 100 | CC | 0.05     | 0.855 | 0.803 | 0.942 | 0.241 | 39.450 |
| MultinomialLRT | 100 | 100 | CC | 0.08     | 0.783 | 0.813 | 0.882 | 0.263 | 44.000 |
| MultinomialLRT | 100 | 300 | CC | 1.00E-04 | 0.997 | 0.794 | 0.944 | 0.193 | 36.000 |
| MultinomialLRT | 100 | 300 | CC | 0.001    | 0.983 | 0.838 | 0.958 | 0.272 | 31.850 |
| MultinomialLRT | 100 | 300 | CC | 0.01     | 0.955 | 0.883 | 0.974 | 0.372 | 27.800 |
| MultinomialLRT | 100 | 300 | CC | 0.03     | 0.884 | 0.902 | 0.871 | 0.431 | 28.650 |
| MultinomialLRT | 100 | 300 | CC | 0.05     | 0.842 | 0.910 | 0.883 | 0.466 | 30.250 |
| MultinomialLRT | 100 | 300 | CC | 0.08     | 0.789 | 0.915 | 0.850 | 0.500 | 33.700 |
| MultinomialLRT | 100 | 500 | CC | 1.00E-04 | 0.996 | 0.885 | 0.986 | 0.462 | 25.500 |
| MultinomialLRT | 100 | 500 | CC | 0.001    | 0.995 | 0.905 | 0.987 | 0.529 | 22.400 |
| MultinomialLRT | 100 | 500 | CC | 0.01     | 0.984 | 0.935 | 0.986 | 0.591 | 19.450 |
| MultinomialLRT | 100 | 500 | CC | 0.03     | 0.952 | 0.943 | 0.969 | 0.633 | 20.050 |
| MultinomialLRT | 100 | 500 | CC | 0.05     | 0.933 | 0.945 | 0.962 | 0.644 | 21.200 |
| MultinomialLRT | 100 | 500 | CC | 0.08     | 0.872 | 0.952 | 0.939 | 0.665 | 25.400 |
| CondGaussLRT   | 100 | 100 | CC | 1.00E-04 | 0.997 | 0.556 | 1.000 | 0.032 | 47.400 |
| CondGaussLRT   | 100 | 100 | CC | 0.001    | 0.997 | 0.617 | 1.000 | 0.046 | 44.850 |
| CondGaussLRT   | 100 | 100 | CC | 0.01     | 0.984 | 0.676 | 0.971 | 0.116 | 40.950 |
| CondGaussLRT   | 100 | 100 | CC | 0.03     | 0.987 | 0.717 | 0.985 | 0.150 | 38.350 |
| CondGaussLRT   | 100 | 100 | CC | 0.05     | 0.960 | 0.749 | 0.986 | 0.182 | 37.400 |
| CondGaussLRT   | 100 | 100 | CC | 0.08     | 0.905 | 0.758 | 0.995 | 0.207 | 38.550 |

EVALUATION OF CAUSAL STRUCTURE LEARNING

|              |     |     |    |          |       |       |       |       |         |
|--------------|-----|-----|----|----------|-------|-------|-------|-------|---------|
| CondGaussLRT | 100 | 300 | CC | 1.00E-04 | 0.997 | 0.738 | 0.944 | 0.123 | 40.450  |
| CondGaussLRT | 100 | 300 | CC | 0.001    | 0.992 | 0.778 | 0.978 | 0.167 | 37.500  |
| CondGaussLRT | 100 | 300 | CC | 0.01     | 0.979 | 0.817 | 0.961 | 0.227 | 34.150  |
| CondGaussLRT | 100 | 300 | CC | 0.03     | 0.979 | 0.832 | 0.965 | 0.265 | 32.300  |
| CondGaussLRT | 100 | 300 | CC | 0.05     | 0.971 | 0.840 | 0.975 | 0.289 | 31.250  |
| CondGaussLRT | 100 | 300 | CC | 0.08     | 0.944 | 0.854 | 0.976 | 0.313 | 31.100  |
| CondGaussLRT | 100 | 500 | CC | 1.00E-04 | 0.996 | 0.852 | 0.986 | 0.349 | 31.150  |
| CondGaussLRT | 100 | 500 | CC | 0.001    | 0.996 | 0.880 | 0.987 | 0.411 | 27.900  |
| CondGaussLRT | 100 | 500 | CC | 0.01     | 0.995 | 0.897 | 0.995 | 0.444 | 25.750  |
| CondGaussLRT | 100 | 500 | CC | 0.03     | 0.991 | 0.915 | 0.993 | 0.489 | 23.750  |
| CondGaussLRT | 100 | 500 | CC | 0.05     | 0.983 | 0.928 | 0.994 | 0.509 | 22.900  |
| CondGaussLRT | 100 | 500 | CC | 0.08     | 0.974 | 0.933 | 0.991 | 0.519 | 23.000  |
| FisherZ      | 100 | 100 | CD | 1.00E-04 | 0.954 | 0.140 | 1.000 | 0.001 | 122.150 |
| FisherZ      | 100 | 100 | CD | 0.001    | 0.910 | 0.188 | 1.000 | 0.004 | 120.650 |
| FisherZ      | 100 | 100 | CD | 0.01     | 0.744 | 0.263 | 0.955 | 0.020 | 124.150 |
| FisherZ      | 100 | 100 | CD | 0.03     | 0.606 | 0.313 | 0.643 | 0.031 | 134.600 |
| FisherZ      | 100 | 100 | CD | 0.05     | 0.511 | 0.342 | 0.525 | 0.042 | 148.350 |
| FisherZ      | 100 | 100 | CD | 0.08     | 0.435 | 0.370 | 0.485 | 0.056 | 166.700 |
| FisherZ      | 100 | 300 | CD | 1.00E-04 | 0.982 | 0.363 | 0.972 | 0.012 | 129.050 |
| FisherZ      | 100 | 300 | CD | 0.001    | 0.957 | 0.418 | 0.988 | 0.031 | 124.500 |
| FisherZ      | 100 | 300 | CD | 0.01     | 0.838 | 0.479 | 0.944 | 0.052 | 127.150 |
| FisherZ      | 100 | 300 | CD | 0.03     | 0.707 | 0.527 | 0.726 | 0.088 | 138.450 |
| FisherZ      | 100 | 300 | CD | 0.05     | 0.619 | 0.555 | 0.723 | 0.106 | 154.000 |
| FisherZ      | 100 | 300 | CD | 0.08     | 0.536 | 0.575 | 0.604 | 0.128 | 177.050 |
| FisherZ      | 100 | 500 | CD | 1.00E-04 | 0.965 | 0.380 | 0.941 | 0.029 | 118.950 |
| FisherZ      | 100 | 500 | CD | 0.001    | 0.936 | 0.443 | 0.917 | 0.058 | 114.550 |
| FisherZ      | 100 | 500 | CD | 0.01     | 0.843 | 0.509 | 0.865 | 0.099 | 116.100 |
| FisherZ      | 100 | 500 | CD | 0.03     | 0.714 | 0.548 | 0.814 | 0.136 | 128.900 |
| FisherZ      | 100 | 500 | CD | 0.05     | 0.637 | 0.574 | 0.792 | 0.172 | 140.150 |
| FisherZ      | 100 | 500 | CD | 0.08     | 0.549 | 0.596 | 0.687 | 0.201 | 162.250 |
| ChiSquare    | 100 | 100 | CD | 1.00E-04 | 0.983 | 0.094 | NaN   | 0.000 | 125.550 |
| ChiSquare    | 100 | 100 | CD | 0.001    | 0.947 | 0.122 | NaN   | 0.000 | 123.950 |
| ChiSquare    | 100 | 100 | CD | 0.01     | 0.952 | 0.170 | 1.000 | 0.001 | 121.100 |
| ChiSquare    | 100 | 100 | CD | 0.03     | 0.955 | 0.219 | NaN   | 0.000 | 118.300 |
| ChiSquare    | 100 | 100 | CD | 0.05     | 0.959 | 0.245 | 0.000 | 0.000 | 117.050 |
| ChiSquare    | 100 | 100 | CD | 0.08     | 0.943 | 0.261 | 1.000 | 0.003 | 116.150 |
| ChiSquare    | 100 | 300 | CD | 1.00E-04 | 0.989 | 0.367 | NaN   | 0.000 | 130.050 |
| ChiSquare    | 100 | 300 | CD | 0.001    | 0.985 | 0.410 | NaN   | 0.000 | 126.900 |
| ChiSquare    | 100 | 300 | CD | 0.01     | 0.979 | 0.482 | 1.000 | 0.004 | 121.600 |
| ChiSquare    | 100 | 300 | CD | 0.03     | 0.978 | 0.533 | 1.000 | 0.008 | 117.900 |
| ChiSquare    | 100 | 300 | CD | 0.05     | 0.974 | 0.554 | 1.000 | 0.015 | 116.200 |
| ChiSquare    | 100 | 300 | CD | 0.08     | 0.971 | 0.573 | 0.908 | 0.032 | 113.950 |
| ChiSquare    | 100 | 500 | CD | 1.00E-04 | 0.998 | 0.434 | 1.000 | 0.003 | 115.500 |
| ChiSquare    | 100 | 500 | CD | 0.001    | 0.997 | 0.483 | 1.000 | 0.008 | 111.750 |
| ChiSquare    | 100 | 500 | CD | 0.01     | 0.986 | 0.546 | 0.846 | 0.023 | 107.300 |

|                |     |     |    |          |       |       |       |       |         |
|----------------|-----|-----|----|----------|-------|-------|-------|-------|---------|
| ChiSquare      | 100 | 500 | CD | 0.03     | 0.973 | 0.591 | 0.764 | 0.030 | 105.100 |
| ChiSquare      | 100 | 500 | CD | 0.05     | 0.963 | 0.613 | 0.865 | 0.045 | 103.550 |
| ChiSquare      | 100 | 500 | CD | 0.08     | 0.961 | 0.635 | 0.863 | 0.064 | 101.100 |
| MultinomialLRT | 100 | 100 | CD | 1.00E-04 | 0.974 | 0.349 | 1.000 | 0.003 | 109.950 |
| MultinomialLRT | 100 | 100 | CD | 0.001    | 0.945 | 0.420 | 0.875 | 0.010 | 106.550 |
| MultinomialLRT | 100 | 100 | CD | 0.01     | 0.802 | 0.522 | 0.911 | 0.037 | 109.450 |
| MultinomialLRT | 100 | 100 | CD | 0.03     | 0.711 | 0.580 | 0.704 | 0.058 | 118.750 |
| MultinomialLRT | 100 | 100 | CD | 0.05     | 0.647 | 0.612 | 0.699 | 0.080 | 127.750 |
| MultinomialLRT | 100 | 100 | CD | 0.08     | 0.572 | 0.633 | 0.608 | 0.102 | 144.350 |
| MultinomialLRT | 100 | 300 | CD | 1.00E-04 | 0.987 | 0.667 | 0.906 | 0.032 | 104.900 |
| MultinomialLRT | 100 | 300 | CD | 0.001    | 0.960 | 0.731 | 0.930 | 0.064 | 98.850  |
| MultinomialLRT | 100 | 300 | CD | 0.01     | 0.858 | 0.799 | 0.979 | 0.133 | 100.750 |
| MultinomialLRT | 100 | 300 | CD | 0.03     | 0.770 | 0.828 | 0.910 | 0.201 | 110.300 |
| MultinomialLRT | 100 | 300 | CD | 0.05     | 0.711 | 0.845 | 0.836 | 0.239 | 121.350 |
| MultinomialLRT | 100 | 300 | CD | 0.08     | 0.644 | 0.860 | 0.789 | 0.283 | 139.650 |
| MultinomialLRT | 100 | 500 | CD | 1.00E-04 | 0.993 | 0.724 | 0.977 | 0.110 | 87.100  |
| MultinomialLRT | 100 | 500 | CD | 0.001    | 0.976 | 0.779 | 0.985 | 0.170 | 80.400  |
| MultinomialLRT | 100 | 500 | CD | 0.01     | 0.916 | 0.837 | 0.982 | 0.283 | 75.200  |
| MultinomialLRT | 100 | 500 | CD | 0.03     | 0.816 | 0.875 | 0.967 | 0.359 | 84.100  |
| MultinomialLRT | 100 | 500 | CD | 0.05     | 0.758 | 0.884 | 0.928 | 0.390 | 94.000  |
| MultinomialLRT | 100 | 500 | CD | 0.08     | 0.683 | 0.897 | 0.888 | 0.435 | 110.900 |
| CondGaussLRT   | 100 | 100 | CD | 1.00E-04 | 0.978 | 0.115 | 1.000 | 0.001 | 124.800 |
| CondGaussLRT   | 100 | 100 | CD | 0.001    | 0.936 | 0.101 | 1.000 | 0.001 | 126.200 |
| CondGaussLRT   | 100 | 100 | CD | 0.01     | 0.963 | 0.077 | 0.958 | 0.008 | 126.250 |
| CondGaussLRT   | 100 | 100 | CD | 0.03     | 0.997 | 0.076 | 0.938 | 0.008 | 125.900 |
| CondGaussLRT   | 100 | 100 | CD | 0.05     | 0.994 | 0.080 | 0.938 | 0.008 | 125.800 |
| CondGaussLRT   | 100 | 100 | CD | 0.08     | 0.988 | 0.088 | 0.625 | 0.008 | 125.350 |
| CondGaussLRT   | 100 | 300 | CD | 1.00E-04 | 1.000 | 0.423 | 0.875 | 0.008 | 126.300 |
| CondGaussLRT   | 100 | 300 | CD | 0.001    | 0.982 | 0.432 | 0.933 | 0.019 | 126.400 |
| CondGaussLRT   | 100 | 300 | CD | 0.01     | 0.968 | 0.431 | 0.974 | 0.023 | 127.450 |
| CondGaussLRT   | 100 | 300 | CD | 0.03     | 0.962 | 0.413 | 0.873 | 0.038 | 127.700 |
| CondGaussLRT   | 100 | 300 | CD | 0.05     | 0.955 | 0.402 | 0.907 | 0.039 | 128.650 |
| CondGaussLRT   | 100 | 300 | CD | 0.08     | 0.938 | 0.374 | 0.967 | 0.049 | 131.100 |
| CondGaussLRT   | 100 | 500 | CD | 1.00E-04 | 1.000 | 0.453 | 0.894 | 0.029 | 113.250 |
| CondGaussLRT   | 100 | 500 | CD | 0.001    | 0.999 | 0.474 | 0.976 | 0.051 | 110.400 |
| CondGaussLRT   | 100 | 500 | CD | 0.01     | 0.979 | 0.478 | 1.000 | 0.068 | 110.250 |
| CondGaussLRT   | 100 | 500 | CD | 0.03     | 0.969 | 0.475 | 0.979 | 0.082 | 110.550 |
| CondGaussLRT   | 100 | 500 | CD | 0.05     | 0.956 | 0.471 | 0.945 | 0.097 | 110.800 |
| CondGaussLRT   | 100 | 500 | CD | 0.08     | 0.954 | 0.459 | 0.926 | 0.101 | 111.500 |
| FisherZ        | 100 | 100 | DD | 1.00E-04 | 0.891 | 0.073 | 1.000 | 0.002 | 62.600  |
| FisherZ        | 100 | 100 | DD | 0.001    | 0.785 | 0.123 | 0.667 | 0.002 | 62.200  |
| FisherZ        | 100 | 100 | DD | 0.01     | 0.477 | 0.170 | 0.917 | 0.006 | 69.300  |
| FisherZ        | 100 | 100 | DD | 0.03     | 0.375 | 0.220 | 0.517 | 0.010 | 79.150  |
| FisherZ        | 100 | 100 | DD | 0.05     | 0.327 | 0.252 | 0.417 | 0.018 | 88.250  |
| FisherZ        | 100 | 100 | DD | 0.08     | 0.261 | 0.276 | 0.221 | 0.023 | 104.500 |

## EVALUATION OF CAUSAL STRUCTURE LEARNING

|                |     |     |    |          |       |       |       |       |         |
|----------------|-----|-----|----|----------|-------|-------|-------|-------|---------|
| FisherZ        | 100 | 300 | DD | 1.00E-04 | 0.957 | 0.215 | NaN   | 0.000 | 65.650  |
| FisherZ        | 100 | 300 | DD | 0.001    | 0.909 | 0.261 | 0.667 | 0.002 | 64.700  |
| FisherZ        | 100 | 300 | DD | 0.01     | 0.676 | 0.343 | 0.757 | 0.021 | 69.500  |
| FisherZ        | 100 | 300 | DD | 0.03     | 0.489 | 0.399 | 0.451 | 0.031 | 82.650  |
| FisherZ        | 100 | 300 | DD | 0.05     | 0.395 | 0.427 | 0.370 | 0.043 | 96.300  |
| FisherZ        | 100 | 300 | DD | 0.08     | 0.321 | 0.448 | 0.288 | 0.062 | 115.150 |
| FisherZ        | 100 | 500 | DD | 1.00E-04 | 0.938 | 0.257 | 1.000 | 0.003 | 64.450  |
| FisherZ        | 100 | 500 | DD | 0.001    | 0.884 | 0.318 | 0.800 | 0.009 | 63.550  |
| FisherZ        | 100 | 500 | DD | 0.01     | 0.711 | 0.437 | 0.660 | 0.026 | 67.750  |
| FisherZ        | 100 | 500 | DD | 0.03     | 0.562 | 0.511 | 0.569 | 0.054 | 79.850  |
| FisherZ        | 100 | 500 | DD | 0.05     | 0.459 | 0.538 | 0.541 | 0.081 | 93.450  |
| FisherZ        | 100 | 500 | DD | 0.08     | 0.379 | 0.568 | 0.468 | 0.106 | 113.300 |
| ChiSquare      | 100 | 100 | DD | 1.00E-04 | 0.969 | 0.241 | NaN   | 0.000 | 58.250  |
| ChiSquare      | 100 | 100 | DD | 0.001    | 0.970 | 0.310 | NaN   | 0.000 | 56.550  |
| ChiSquare      | 100 | 100 | DD | 0.01     | 0.968 | 0.383 | 0.000 | 0.000 | 54.200  |
| ChiSquare      | 100 | 100 | DD | 0.03     | 0.957 | 0.426 | NaN   | 0.000 | 53.050  |
| ChiSquare      | 100 | 100 | DD | 0.05     | 0.951 | 0.439 | NaN   | 0.000 | 52.550  |
| ChiSquare      | 100 | 100 | DD | 0.08     | 0.941 | 0.478 | 0.750 | 0.007 | 51.450  |
| ChiSquare      | 100 | 300 | DD | 1.00E-04 | 0.976 | 0.486 | NaN   | 0.000 | 57.250  |
| ChiSquare      | 100 | 300 | DD | 0.001    | 0.981 | 0.543 | NaN   | 0.000 | 55.300  |
| ChiSquare      | 100 | 300 | DD | 0.01     | 0.945 | 0.608 | 1.000 | 0.002 | 54.100  |
| ChiSquare      | 100 | 300 | DD | 0.03     | 0.934 | 0.644 | 0.767 | 0.008 | 53.200  |
| ChiSquare      | 100 | 300 | DD | 0.05     | 0.921 | 0.660 | 0.875 | 0.014 | 52.950  |
| ChiSquare      | 100 | 300 | DD | 0.08     | 0.924 | 0.692 | 0.825 | 0.025 | 51.750  |
| ChiSquare      | 100 | 500 | DD | 1.00E-04 | 0.988 | 0.584 | NaN   | 0.000 | 52.300  |
| ChiSquare      | 100 | 500 | DD | 0.001    | 0.984 | 0.635 | 1.000 | 0.001 | 50.750  |
| ChiSquare      | 100 | 500 | DD | 0.01     | 0.975 | 0.712 | 1.000 | 0.005 | 48.050  |
| ChiSquare      | 100 | 500 | DD | 0.03     | 0.973 | 0.748 | 0.778 | 0.012 | 46.950  |
| ChiSquare      | 100 | 500 | DD | 0.05     | 0.963 | 0.777 | 0.667 | 0.024 | 46.400  |
| ChiSquare      | 100 | 500 | DD | 0.08     | 0.955 | 0.803 | 0.710 | 0.041 | 45.550  |
| MultinomialLRT | 100 | 100 | DD | 1.00E-04 | 0.957 | 0.456 | 0.750 | 0.006 | 51.900  |
| MultinomialLRT | 100 | 100 | DD | 0.001    | 0.900 | 0.535 | 0.700 | 0.013 | 51.000  |
| MultinomialLRT | 100 | 100 | DD | 0.01     | 0.734 | 0.627 | 0.777 | 0.043 | 57.300  |
| MultinomialLRT | 100 | 100 | DD | 0.03     | 0.602 | 0.676 | 0.544 | 0.070 | 68.750  |
| MultinomialLRT | 100 | 100 | DD | 0.05     | 0.517 | 0.696 | 0.520 | 0.092 | 80.350  |
| MultinomialLRT | 100 | 100 | DD | 0.08     | 0.449 | 0.719 | 0.392 | 0.126 | 93.000  |
| MultinomialLRT | 100 | 300 | DD | 1.00E-04 | 0.989 | 0.680 | 1.000 | 0.021 | 49.550  |
| MultinomialLRT | 100 | 300 | DD | 0.001    | 0.937 | 0.742 | 0.974 | 0.056 | 47.750  |
| MultinomialLRT | 100 | 300 | DD | 0.01     | 0.797 | 0.805 | 0.915 | 0.114 | 51.650  |
| MultinomialLRT | 100 | 300 | DD | 0.03     | 0.671 | 0.837 | 0.803 | 0.161 | 62.400  |
| MultinomialLRT | 100 | 300 | DD | 0.05     | 0.596 | 0.842 | 0.711 | 0.198 | 72.650  |
| MultinomialLRT | 100 | 300 | DD | 0.08     | 0.518 | 0.858 | 0.638 | 0.241 | 87.700  |
| MultinomialLRT | 100 | 500 | DD | 1.00E-04 | 0.997 | 0.831 | 0.990 | 0.116 | 38.650  |
| MultinomialLRT | 100 | 500 | DD | 0.001    | 0.966 | 0.874 | 0.993 | 0.186 | 36.150  |
| MultinomialLRT | 100 | 500 | DD | 0.01     | 0.862 | 0.913 | 0.987 | 0.278 | 38.950  |

|                |     |     |     |          |       |       |       |       |         |
|----------------|-----|-----|-----|----------|-------|-------|-------|-------|---------|
| MultinomialLRT | 100 | 500 | DD  | 0.03     | 0.727 | 0.928 | 0.931 | 0.352 | 50.350  |
| MultinomialLRT | 100 | 500 | DD  | 0.05     | 0.638 | 0.936 | 0.844 | 0.397 | 61.800  |
| MultinomialLRT | 100 | 500 | DD  | 0.08     | 0.545 | 0.939 | 0.732 | 0.461 | 78.650  |
| CondGaussLRT   | 100 | 100 | DD  | 1.00E-04 | 0.992 | 0.161 | NaN   | 0.000 | 60.600  |
| CondGaussLRT   | 100 | 100 | DD  | 0.001    | 1.000 | 0.196 | 0.667 | 0.002 | 59.300  |
| CondGaussLRT   | 100 | 100 | DD  | 0.01     | 0.990 | 0.220 | 0.750 | 0.004 | 58.550  |
| CondGaussLRT   | 100 | 100 | DD  | 0.03     | 0.995 | 0.234 | 0.800 | 0.005 | 57.900  |
| CondGaussLRT   | 100 | 100 | DD  | 0.05     | 1.000 | 0.239 | 0.800 | 0.005 | 57.600  |
| CondGaussLRT   | 100 | 100 | DD  | 0.08     | 0.996 | 0.253 | 0.800 | 0.005 | 57.250  |
| CondGaussLRT   | 100 | 300 | DD  | 1.00E-04 | 1.000 | 0.337 | NaN   | 0.000 | 62.150  |
| CondGaussLRT   | 100 | 300 | DD  | 0.001    | 0.992 | 0.348 | NaN   | 0.000 | 62.050  |
| CondGaussLRT   | 100 | 300 | DD  | 0.01     | 0.983 | 0.360 | 1.000 | 0.002 | 61.950  |
| CondGaussLRT   | 100 | 300 | DD  | 0.03     | 1.000 | 0.354 | 1.000 | 0.002 | 61.950  |
| CondGaussLRT   | 100 | 300 | DD  | 0.05     | 1.000 | 0.353 | 1.000 | 0.002 | 61.950  |
| CondGaussLRT   | 100 | 300 | DD  | 0.08     | 1.000 | 0.347 | NaN   | 0.000 | 62.200  |
| CondGaussLRT   | 100 | 500 | DD  | 1.00E-04 | 1.000 | 0.448 | 1.000 | 0.002 | 57.000  |
| CondGaussLRT   | 100 | 500 | DD  | 0.001    | 1.000 | 0.458 | 1.000 | 0.006 | 56.550  |
| CondGaussLRT   | 100 | 500 | DD  | 0.01     | 0.997 | 0.451 | 1.000 | 0.013 | 56.450  |
| CondGaussLRT   | 100 | 500 | DD  | 0.03     | 0.986 | 0.435 | 1.000 | 0.020 | 56.800  |
| CondGaussLRT   | 100 | 500 | DD  | 0.05     | 0.982 | 0.424 | 0.900 | 0.022 | 57.150  |
| CondGaussLRT   | 100 | 500 | DD  | 0.08     | 0.985 | 0.410 | 0.900 | 0.022 | 57.650  |
| FisherZ        | 100 | 100 | All | 1.00E-04 | 0.978 | 0.239 | 0.977 | 0.014 | 230.250 |
| FisherZ        | 100 | 100 | All | 0.001    | 0.940 | 0.289 | 0.961 | 0.022 | 225.550 |
| FisherZ        | 100 | 100 | All | 0.01     | 0.766 | 0.356 | 0.977 | 0.049 | 234.750 |
| FisherZ        | 100 | 100 | All | 0.03     | 0.636 | 0.403 | 0.852 | 0.070 | 255.900 |
| FisherZ        | 100 | 100 | All | 0.05     | 0.552 | 0.431 | 0.758 | 0.087 | 280.950 |
| FisherZ        | 100 | 100 | All | 0.08     | 0.465 | 0.458 | 0.642 | 0.111 | 321.000 |
| FisherZ        | 100 | 300 | All | 1.00E-04 | 0.979 | 0.439 | 0.969 | 0.058 | 228.150 |
| FisherZ        | 100 | 300 | All | 0.001    | 0.956 | 0.486 | 0.978 | 0.088 | 218.850 |
| FisherZ        | 100 | 300 | All | 0.01     | 0.833 | 0.544 | 0.934 | 0.120 | 225.500 |
| FisherZ        | 100 | 300 | All | 0.03     | 0.695 | 0.587 | 0.776 | 0.155 | 253.950 |
| FisherZ        | 100 | 300 | All | 0.05     | 0.607 | 0.610 | 0.751 | 0.174 | 287.900 |
| FisherZ        | 100 | 300 | All | 0.08     | 0.522 | 0.626 | 0.673 | 0.192 | 337.450 |
| FisherZ        | 100 | 500 | All | 1.00E-04 | 0.968 | 0.484 | 0.978 | 0.126 | 210.300 |
| FisherZ        | 100 | 500 | All | 0.001    | 0.946 | 0.534 | 0.970 | 0.154 | 203.100 |
| FisherZ        | 100 | 500 | All | 0.01     | 0.850 | 0.603 | 0.926 | 0.195 | 208.750 |
| FisherZ        | 100 | 500 | All | 0.03     | 0.727 | 0.642 | 0.859 | 0.228 | 237.800 |
| FisherZ        | 100 | 500 | All | 0.05     | 0.644 | 0.663 | 0.829 | 0.257 | 266.800 |
| FisherZ        | 100 | 500 | All | 0.08     | 0.553 | 0.681 | 0.741 | 0.282 | 316.950 |
| ChiSquare      | 100 | 100 | All | 1.00E-04 | 0.984 | 0.168 | NaN   | 0.000 | 241.700 |
| ChiSquare      | 100 | 100 | All | 0.001    | 0.966 | 0.210 | NaN   | 0.000 | 237.250 |
| ChiSquare      | 100 | 100 | All | 0.01     | 0.947 | 0.267 | 0.500 | 0.000 | 231.450 |
| ChiSquare      | 100 | 100 | All | 0.03     | 0.952 | 0.320 | 0.750 | 0.001 | 225.300 |
| ChiSquare      | 100 | 100 | All | 0.05     | 0.955 | 0.339 | 0.625 | 0.002 | 222.900 |
| ChiSquare      | 100 | 100 | All | 0.08     | 0.940 | 0.366 | 0.688 | 0.005 | 220.200 |



## EVALUATION OF CAUSAL STRUCTURE LEARNING

|                |     |     |     |          |       |       |       |       |         |
|----------------|-----|-----|-----|----------|-------|-------|-------|-------|---------|
| ChiSquare      | 100 | 300 | All | 1.00E-04 | 0.986 | 0.421 | 1.000 | 0.000 | 241.000 |
| ChiSquare      | 100 | 300 | All | 0.001    | 0.984 | 0.466 | 1.000 | 0.000 | 234.750 |
| ChiSquare      | 100 | 300 | All | 0.01     | 0.965 | 0.534 | 1.000 | 0.006 | 226.650 |
| ChiSquare      | 100 | 300 | All | 0.03     | 0.959 | 0.578 | 0.935 | 0.015 | 220.400 |
| ChiSquare      | 100 | 300 | All | 0.05     | 0.951 | 0.598 | 0.922 | 0.021 | 218.200 |
| ChiSquare      | 100 | 300 | All | 0.08     | 0.952 | 0.622 | 0.899 | 0.037 | 213.100 |
| ChiSquare      | 100 | 500 | All | 1.00E-04 | 0.990 | 0.510 | 1.000 | 0.006 | 221.000 |
| ChiSquare      | 100 | 500 | All | 0.001    | 0.988 | 0.559 | 1.000 | 0.012 | 214.000 |
| ChiSquare      | 100 | 500 | All | 0.01     | 0.976 | 0.624 | 0.914 | 0.031 | 204.000 |
| ChiSquare      | 100 | 500 | All | 0.03     | 0.967 | 0.662 | 0.904 | 0.043 | 199.050 |
| ChiSquare      | 100 | 500 | All | 0.05     | 0.955 | 0.687 | 0.887 | 0.060 | 196.400 |
| ChiSquare      | 100 | 500 | All | 0.08     | 0.948 | 0.706 | 0.873 | 0.077 | 192.950 |
| MultinomialLRT | 100 | 100 | All | 1.00E-04 | 0.977 | 0.434 | 0.981 | 0.015 | 208.000 |
| MultinomialLRT | 100 | 100 | All | 0.001    | 0.950 | 0.507 | 0.938 | 0.028 | 199.800 |
| MultinomialLRT | 100 | 100 | All | 0.01     | 0.817 | 0.596 | 0.934 | 0.063 | 207.200 |
| MultinomialLRT | 100 | 100 | All | 0.03     | 0.719 | 0.649 | 0.786 | 0.096 | 226.800 |
| MultinomialLRT | 100 | 100 | All | 0.05     | 0.650 | 0.679 | 0.750 | 0.124 | 247.550 |
| MultinomialLRT | 100 | 100 | All | 0.08     | 0.575 | 0.697 | 0.625 | 0.150 | 281.350 |
| MultinomialLRT | 100 | 300 | All | 1.00E-04 | 0.990 | 0.697 | 0.945 | 0.067 | 190.450 |
| MultinomialLRT | 100 | 300 | All | 0.001    | 0.960 | 0.757 | 0.956 | 0.110 | 178.450 |
| MultinomialLRT | 100 | 300 | All | 0.01     | 0.863 | 0.818 | 0.969 | 0.184 | 180.200 |
| MultinomialLRT | 100 | 300 | All | 0.03     | 0.765 | 0.846 | 0.891 | 0.245 | 201.350 |
| MultinomialLRT | 100 | 300 | All | 0.05     | 0.705 | 0.857 | 0.824 | 0.282 | 224.250 |
| MultinomialLRT | 100 | 300 | All | 0.08     | 0.635 | 0.870 | 0.776 | 0.325 | 261.050 |
| MultinomialLRT | 100 | 500 | All | 1.00E-04 | 0.995 | 0.790 | 0.983 | 0.202 | 151.250 |
| MultinomialLRT | 100 | 500 | All | 0.001    | 0.979 | 0.834 | 0.985 | 0.265 | 138.950 |
| MultinomialLRT | 100 | 500 | All | 0.01     | 0.920 | 0.880 | 0.984 | 0.360 | 133.600 |
| MultinomialLRT | 100 | 500 | All | 0.03     | 0.822 | 0.905 | 0.960 | 0.427 | 154.500 |
| MultinomialLRT | 100 | 500 | All | 0.05     | 0.760 | 0.912 | 0.919 | 0.456 | 177.000 |
| MultinomialLRT | 100 | 500 | All | 0.08     | 0.678 | 0.921 | 0.863 | 0.500 | 214.950 |
| CondGaussLRT   | 100 | 100 | All | 1.00E-04 | 0.992 | 0.234 | 1.000 | 0.009 | 232.800 |
| CondGaussLRT   | 100 | 100 | All | 0.001    | 0.982 | 0.252 | 0.975 | 0.013 | 230.350 |
| CondGaussLRT   | 100 | 100 | All | 0.01     | 0.978 | 0.261 | 0.957 | 0.036 | 225.750 |
| CondGaussLRT   | 100 | 100 | All | 0.03     | 0.988 | 0.273 | 0.973 | 0.045 | 222.150 |
| CondGaussLRT   | 100 | 100 | All | 0.05     | 0.970 | 0.284 | 0.974 | 0.052 | 220.800 |
| CondGaussLRT   | 100 | 100 | All | 0.08     | 0.931 | 0.294 | 0.979 | 0.058 | 221.150 |
| CondGaussLRT   | 100 | 300 | All | 1.00E-04 | 0.999 | 0.474 | 0.938 | 0.033 | 228.900 |
| CondGaussLRT   | 100 | 300 | All | 0.001    | 0.987 | 0.491 | 0.961 | 0.049 | 225.950 |
| CondGaussLRT   | 100 | 300 | All | 0.01     | 0.973 | 0.502 | 0.965 | 0.065 | 223.550 |
| CondGaussLRT   | 100 | 300 | All | 0.03     | 0.977 | 0.494 | 0.952 | 0.082 | 221.950 |
| CondGaussLRT   | 100 | 300 | All | 0.05     | 0.970 | 0.490 | 0.964 | 0.087 | 221.850 |
| CondGaussLRT   | 100 | 300 | All | 0.08     | 0.951 | 0.477 | 0.975 | 0.098 | 224.400 |
| CondGaussLRT   | 100 | 500 | All | 1.00E-04 | 0.998 | 0.551 | 0.977 | 0.104 | 201.400 |
| CondGaussLRT   | 100 | 500 | All | 0.001    | 0.998 | 0.571 | 0.986 | 0.132 | 194.850 |
| CondGaussLRT   | 100 | 500 | All | 0.01     | 0.988 | 0.577 | 0.996 | 0.152 | 192.450 |

|              |     |     |     |      |       |       |       |       |         |
|--------------|-----|-----|-----|------|-------|-------|-------|-------|---------|
| CondGaussLRT | 100 | 500 | All | 0.03 | 0.980 | 0.577 | 0.990 | 0.172 | 191.100 |
| CondGaussLRT | 100 | 500 | All | 0.05 | 0.971 | 0.576 | 0.984 | 0.185 | 190.850 |
| CondGaussLRT | 100 | 500 | All | 0.08 | 0.966 | 0.568 | 0.977 | 0.190 | 192.150 |

Table 7: Comparison of mixed data structure learning algorithms with Lee and Hastie Simulated data with average density 1.5

| Num_Vars | Algorithm     | Sample.Size | Type | Parameter | AP    | AR    | AHP   | AHR   | SHD    |
|----------|---------------|-------------|------|-----------|-------|-------|-------|-------|--------|
| 50       | Copula-PC     | 100         | All  | 1e-04     | 0.997 | 0.263 | 0.85  | 0.013 | 117.15 |
| 50       | Copula-PC     | 100         | All  | 0.001     | 0.972 | 0.308 | 0.98  | 0.022 | 114.1  |
| 50       | Copula-PC     | 100         | All  | 0.01      | 0.87  | 0.384 | 0.981 | 0.072 | 111    |
| 50       | Copula-PC     | 100         | All  | 0.03      | 0.774 | 0.438 | 0.931 | 0.095 | 114.4  |
| 50       | Copula-PC     | 100         | All  | 0.05      | 0.708 | 0.457 | 0.903 | 0.11  | 119.25 |
| 50       | Copula-PC     | 100         | All  | 0.08      | 0.632 | 0.486 | 0.815 | 0.126 | 128.85 |
| 50       | Copula-PC     | 300         | All  | 1e-04     | 0.978 | 0.413 | 0.937 | 0.074 | 118.15 |
| 50       | Copula-PC     | 300         | All  | 0.001     | 0.955 | 0.457 | 0.929 | 0.093 | 114.85 |
| 50       | Copula-PC     | 300         | All  | 0.01      | 0.855 | 0.525 | 0.881 | 0.147 | 114.3  |
| 50       | Copula-PC     | 300         | All  | 0.03      | 0.75  | 0.567 | 0.784 | 0.185 | 122.4  |
| 50       | Copula-PC     | 300         | All  | 0.05      | 0.68  | 0.592 | 0.749 | 0.202 | 132.25 |
| 50       | Copula-PC     | 300         | All  | 0.08      | 0.595 | 0.611 | 0.707 | 0.249 | 148.75 |
| 50       | Copula-PC     | 500         | All  | 1e-04     | 0.946 | 0.52  | 0.938 | 0.129 | 101.6  |
| 50       | Copula-PC     | 500         | All  | 0.001     | 0.911 | 0.568 | 0.902 | 0.164 | 99.95  |
| 50       | Copula-PC     | 500         | All  | 0.01      | 0.813 | 0.638 | 0.835 | 0.242 | 102.55 |
| 50       | Copula-PC     | 500         | All  | 0.03      | 0.717 | 0.676 | 0.737 | 0.294 | 113.8  |
| 50       | Copula-PC     | 500         | All  | 0.05      | 0.646 | 0.69  | 0.681 | 0.314 | 127.55 |
| 50       | Copula-PC     | 500         | All  | 0.08      | 0.577 | 0.709 | 0.628 | 0.346 | 144.75 |
| 50       | MGM-CPCStable | 100         | All  | 1e-04     | 0.998 | 0.414 | 0.929 | 0.01  | 108.75 |
| 50       | MGM-CPCStable | 100         | All  | 0.001     | 0.993 | 0.462 | 0.975 | 0.022 | 105    |
| 50       | MGM-CPCStable | 100         | All  | 0.01      | 0.971 | 0.518 | 0.94  | 0.043 | 100.95 |
| 50       | MGM-CPCStable | 100         | All  | 0.03      | 0.957 | 0.533 | 0.838 | 0.061 | 100    |
| 50       | MGM-CPCStable | 100         | All  | 0.05      | 0.956 | 0.547 | 0.879 | 0.076 | 98.95  |
| 50       | MGM-CPCStable | 100         | All  | 0.08      | 0.949 | 0.552 | 0.865 | 0.083 | 98.6   |
| 50       | MGM-CPCStable | 300         | All  | 1e-04     | 0.996 | 0.565 | 0.918 | 0.072 | 108.3  |
| 50       | MGM-CPCStable | 300         | All  | 0.001     | 0.995 | 0.587 | 0.892 | 0.096 | 105.55 |
| 50       | MGM-CPCStable | 300         | All  | 0.01      | 0.993 | 0.602 | 0.956 | 0.129 | 102.15 |
| 50       | MGM-CPCStable | 300         | All  | 0.03      | 0.989 | 0.608 | 0.962 | 0.156 | 100.45 |
| 50       | MGM-CPCStable | 300         | All  | 0.05      | 0.987 | 0.612 | 0.963 | 0.158 | 99.95  |
| 50       | MGM-CPCStable | 300         | All  | 0.08      | 0.984 | 0.614 | 0.964 | 0.169 | 99.45  |
| 50       | MGM-CPCStable | 500         | All  | 1e-04     | 0.993 | 0.64  | 0.977 | 0.147 | 90.8   |
| 50       | MGM-CPCStable | 500         | All  | 0.001     | 0.994 | 0.648 | 0.976 | 0.182 | 87.65  |
| 50       | MGM-CPCStable | 500         | All  | 0.01      | 0.992 | 0.657 | 0.993 | 0.224 | 84.1   |
| 50       | MGM-CPCStable | 500         | All  | 0.03      | 0.987 | 0.659 | 0.978 | 0.238 | 83.65  |
| 50       | MGM-CPCStable | 500         | All  | 0.05      | 0.986 | 0.661 | 0.963 | 0.244 | 83.4   |
| 50       | MGM-CPCStable | 500         | All  | 0.08      | 0.984 | 0.662 | 0.965 | 0.248 | 83.15  |
| 50       | MGM-PCStable  | 100         | All  | 1e-04     | 0.998 | 0.414 | 0.45  | 0.169 | 112.7  |

EVALUATION OF CAUSAL STRUCTURE LEARNING

|    |              |     |     |       |       |       |       |       |        |
|----|--------------|-----|-----|-------|-------|-------|-------|-------|--------|
| 50 | MGM-PCStable | 100 | All | 0.001 | 0.993 | 0.462 | 0.476 | 0.224 | 110.15 |
| 50 | MGM-PCStable | 100 | All | 0.01  | 0.971 | 0.518 | 0.456 | 0.289 | 107.95 |
| 50 | MGM-PCStable | 100 | All | 0.03  | 0.957 | 0.533 | 0.453 | 0.307 | 107.55 |
| 50 | MGM-PCStable | 100 | All | 0.05  | 0.956 | 0.547 | 0.453 | 0.322 | 107.35 |
| 50 | MGM-PCStable | 100 | All | 0.08  | 0.949 | 0.552 | 0.452 | 0.33  | 107.45 |
| 50 | MGM-PCStable | 300 | All | 1e-04 | 0.996 | 0.565 | 0.472 | 0.371 | 115.75 |
| 50 | MGM-PCStable | 300 | All | 0.001 | 0.995 | 0.587 | 0.471 | 0.396 | 114.55 |
| 50 | MGM-PCStable | 300 | All | 0.01  | 0.993 | 0.602 | 0.475 | 0.419 | 113    |
| 50 | MGM-PCStable | 300 | All | 0.03  | 0.989 | 0.608 | 0.472 | 0.425 | 113.15 |
| 50 | MGM-PCStable | 300 | All | 0.05  | 0.987 | 0.612 | 0.475 | 0.432 | 112.6  |
| 50 | MGM-PCStable | 300 | All | 0.08  | 0.984 | 0.614 | 0.474 | 0.435 | 112.7  |
| 50 | MGM-PCStable | 500 | All | 1e-04 | 0.993 | 0.64  | 0.474 | 0.455 | 103.25 |
| 50 | MGM-PCStable | 500 | All | 0.001 | 0.994 | 0.648 | 0.478 | 0.466 | 102.25 |
| 50 | MGM-PCStable | 500 | All | 0.01  | 0.992 | 0.657 | 0.475 | 0.477 | 101.95 |
| 50 | MGM-PCStable | 500 | All | 0.03  | 0.987 | 0.659 | 0.473 | 0.479 | 102.3  |
| 50 | MGM-PCStable | 500 | All | 0.05  | 0.986 | 0.661 | 0.473 | 0.482 | 102.25 |
| 50 | MGM-PCStable | 500 | All | 0.08  | 0.984 | 0.662 | 0.473 | 0.484 | 102.35 |
| 50 | FGES         | 100 | All | 1     | 0.914 | 0.606 | 0.746 | 0.219 | 90.7   |
| 50 | FGES         | 100 | All | 1.5   | 0.91  | 0.609 | 0.744 | 0.222 | 90.6   |
| 50 | FGES         | 100 | All | 2     | 0.904 | 0.613 | 0.703 | 0.225 | 90.9   |
| 50 | FGES         | 100 | All | 3     | 0.888 | 0.618 | 0.687 | 0.232 | 91.7   |
| 50 | FGES         | 100 | All | 4     | 0.879 | 0.62  | 0.684 | 0.233 | 92.15  |
| 50 | FGES         | 100 | All | 5     | 0.87  | 0.62  | 0.669 | 0.225 | 93.15  |
| 50 | FGES         | 300 | All | 1     | 0.962 | 0.692 | 0.745 | 0.309 | 89.65  |
| 50 | FGES         | 300 | All | 1.5   | 0.96  | 0.693 | 0.742 | 0.31  | 89.8   |
| 50 | FGES         | 300 | All | 2     | 0.955 | 0.693 | 0.731 | 0.315 | 90.55  |
| 50 | FGES         | 300 | All | 3     | 0.952 | 0.693 | 0.729 | 0.315 | 90.9   |
| 50 | FGES         | 300 | All | 4     | 0.953 | 0.697 | 0.737 | 0.317 | 89.9   |
| 50 | FGES         | 300 | All | 5     | 0.951 | 0.698 | 0.736 | 0.318 | 90.05  |
| 50 | FGES         | 500 | All | 1     | 0.97  | 0.78  | 0.777 | 0.383 | 71.5   |
| 50 | FGES         | 500 | All | 1.5   | 0.968 | 0.782 | 0.788 | 0.388 | 71.45  |
| 50 | FGES         | 500 | All | 2     | 0.967 | 0.784 | 0.785 | 0.389 | 71.35  |
| 50 | FGES         | 500 | All | 3     | 0.966 | 0.786 | 0.786 | 0.393 | 71.15  |
| 50 | FGES         | 500 | All | 4     | 0.966 | 0.787 | 0.785 | 0.393 | 71.15  |
| 50 | FGES         | 500 | All | 5     | 0.963 | 0.787 | 0.784 | 0.394 | 71.3   |
| 50 | MGM-PCMax    | 100 | All | 1e-04 | 0.995 | 0.423 | 0.335 | 0.089 | 114.15 |
| 50 | MGM-PCMax    | 100 | All | 0.001 | 0.991 | 0.469 | 0.348 | 0.111 | 112.45 |
| 50 | MGM-PCMax    | 100 | All | 0.01  | 0.966 | 0.52  | 0.357 | 0.143 | 110.6  |
| 50 | MGM-PCMax    | 100 | All | 0.03  | 0.956 | 0.535 | 0.363 | 0.152 | 110.05 |
| 50 | MGM-PCMax    | 100 | All | 0.05  | 0.953 | 0.547 | 0.365 | 0.159 | 109.65 |
| 50 | MGM-PCMax    | 100 | All | 0.08  | 0.949 | 0.552 | 0.364 | 0.161 | 109.7  |
| 50 | MGM-PCMax    | 300 | All | 1e-04 | 0.995 | 0.565 | 0.38  | 0.175 | 119.6  |
| 50 | MGM-PCMax    | 300 | All | 0.001 | 0.992 | 0.588 | 0.386 | 0.189 | 118.6  |
| 50 | MGM-PCMax    | 300 | All | 0.01  | 0.992 | 0.602 | 0.395 | 0.2   | 116.85 |
| 50 | MGM-PCMax    | 300 | All | 0.03  | 0.989 | 0.608 | 0.39  | 0.2   | 117.05 |

|    |               |     |     |       |       |       |       |       |        |
|----|---------------|-----|-----|-------|-------|-------|-------|-------|--------|
| 50 | MGM-PCMax     | 300 | All | 0.05  | 0.987 | 0.612 | 0.388 | 0.201 | 117.15 |
| 50 | MGM-PCMax     | 300 | All | 0.08  | 0.984 | 0.614 | 0.39  | 0.204 | 117.05 |
| 50 | MGM-PCMax     | 500 | All | 1e-04 | 0.992 | 0.64  | 0.387 | 0.21  | 108.85 |
| 50 | MGM-PCMax     | 500 | All | 0.001 | 0.993 | 0.648 | 0.389 | 0.213 | 108.25 |
| 50 | MGM-PCMax     | 500 | All | 0.01  | 0.992 | 0.657 | 0.393 | 0.221 | 107.55 |
| 50 | MGM-PCMax     | 500 | All | 0.03  | 0.986 | 0.659 | 0.393 | 0.223 | 107.9  |
| 50 | MGM-PCMax     | 500 | All | 0.05  | 0.986 | 0.661 | 0.391 | 0.224 | 107.85 |
| 50 | MGM-PCMax     | 500 | All | 0.08  | 0.984 | 0.662 | 0.394 | 0.226 | 107.7  |
| 50 | Copula-PC     | 100 | CC  | 1e-04 | 1     | 0.632 | 0.85  | 0.051 | 22.75  |
| 50 | Copula-PC     | 100 | CC  | 0.001 | 0.978 | 0.688 | 0.98  | 0.082 | 21.4   |
| 50 | Copula-PC     | 100 | CC  | 0.01  | 0.931 | 0.785 | 0.984 | 0.192 | 18.85  |
| 50 | Copula-PC     | 100 | CC  | 0.03  | 0.886 | 0.822 | 0.953 | 0.244 | 18.9   |
| 50 | Copula-PC     | 100 | CC  | 0.05  | 0.821 | 0.831 | 0.935 | 0.275 | 20.1   |
| 50 | Copula-PC     | 100 | CC  | 0.08  | 0.784 | 0.862 | 0.884 | 0.311 | 20.9   |
| 50 | Copula-PC     | 300 | CC  | 1e-04 | 0.974 | 0.81  | 0.939 | 0.235 | 18.6   |
| 50 | Copula-PC     | 300 | CC  | 0.001 | 0.964 | 0.842 | 0.947 | 0.282 | 17.2   |
| 50 | Copula-PC     | 300 | CC  | 0.01  | 0.901 | 0.875 | 0.944 | 0.379 | 16.5   |
| 50 | Copula-PC     | 300 | CC  | 0.03  | 0.861 | 0.889 | 0.904 | 0.438 | 16.25  |
| 50 | Copula-PC     | 300 | CC  | 0.05  | 0.817 | 0.906 | 0.887 | 0.462 | 17.1   |
| 50 | Copula-PC     | 300 | CC  | 0.08  | 0.773 | 0.917 | 0.814 | 0.497 | 18.8   |
| 50 | Copula-PC     | 500 | CC  | 1e-04 | 0.931 | 0.884 | 0.955 | 0.414 | 15.2   |
| 50 | Copula-PC     | 500 | CC  | 0.001 | 0.922 | 0.901 | 0.96  | 0.47  | 14.55  |
| 50 | Copula-PC     | 500 | CC  | 0.01  | 0.901 | 0.925 | 0.956 | 0.553 | 13.35  |
| 50 | Copula-PC     | 500 | CC  | 0.03  | 0.839 | 0.934 | 0.913 | 0.611 | 13.95  |
| 50 | Copula-PC     | 500 | CC  | 0.05  | 0.791 | 0.938 | 0.855 | 0.626 | 15.85  |
| 50 | Copula-PC     | 500 | CC  | 0.08  | 0.752 | 0.94  | 0.837 | 0.633 | 17.45  |
| 50 | MGM-CPCStable | 100 | CC  | 1e-04 | 0.995 | 0.605 | 0.917 | 0.036 | 23.45  |
| 50 | MGM-CPCStable | 100 | CC  | 0.001 | 0.996 | 0.67  | 0.972 | 0.073 | 21.7   |
| 50 | MGM-CPCStable | 100 | CC  | 0.01  | 0.967 | 0.747 | 0.955 | 0.129 | 19.75  |
| 50 | MGM-CPCStable | 100 | CC  | 0.03  | 0.958 | 0.765 | 0.874 | 0.165 | 19     |
| 50 | MGM-CPCStable | 100 | CC  | 0.05  | 0.96  | 0.788 | 0.921 | 0.202 | 18.2   |
| 50 | MGM-CPCStable | 100 | CC  | 0.08  | 0.956 | 0.799 | 0.924 | 0.211 | 18.05  |
| 50 | MGM-CPCStable | 300 | CC  | 1e-04 | 0.989 | 0.762 | 0.908 | 0.179 | 20.5   |
| 50 | MGM-CPCStable | 300 | CC  | 0.001 | 0.989 | 0.786 | 0.886 | 0.223 | 19.5   |
| 50 | MGM-CPCStable | 300 | CC  | 0.01  | 0.986 | 0.817 | 0.939 | 0.266 | 18.1   |
| 50 | MGM-CPCStable | 300 | CC  | 0.03  | 0.982 | 0.82  | 0.958 | 0.293 | 17.9   |
| 50 | MGM-CPCStable | 300 | CC  | 0.05  | 0.982 | 0.828 | 0.96  | 0.306 | 17.45  |
| 50 | MGM-CPCStable | 300 | CC  | 0.08  | 0.977 | 0.83  | 0.964 | 0.319 | 17.4   |
| 50 | MGM-CPCStable | 500 | CC  | 1e-04 | 0.989 | 0.839 | 0.971 | 0.365 | 16.15  |
| 50 | MGM-CPCStable | 500 | CC  | 0.001 | 0.992 | 0.854 | 0.973 | 0.41  | 15     |
| 50 | MGM-CPCStable | 500 | CC  | 0.01  | 0.992 | 0.864 | 0.99  | 0.439 | 14.3   |
| 50 | MGM-CPCStable | 500 | CC  | 0.03  | 0.987 | 0.864 | 0.98  | 0.436 | 14.6   |
| 50 | MGM-CPCStable | 500 | CC  | 0.05  | 0.987 | 0.866 | 0.977 | 0.443 | 14.45  |
| 50 | MGM-CPCStable | 500 | CC  | 0.08  | 0.985 | 0.869 | 0.977 | 0.448 | 14.4   |
| 50 | MGM-PCStable  | 100 | CC  | 1e-04 | 0.995 | 0.605 | 0.483 | 0.287 | 24.9   |

EVALUATION OF CAUSAL STRUCTURE LEARNING

|    |              |     |    |       |       |       |       |       |       |
|----|--------------|-----|----|-------|-------|-------|-------|-------|-------|
| 50 | MGM-PCStable | 100 | CC | 0.001 | 0.996 | 0.67  | 0.472 | 0.364 | 23.7  |
| 50 | MGM-PCStable | 100 | CC | 0.01  | 0.967 | 0.747 | 0.434 | 0.468 | 22.9  |
| 50 | MGM-PCStable | 100 | CC | 0.03  | 0.958 | 0.765 | 0.424 | 0.489 | 22.7  |
| 50 | MGM-PCStable | 100 | CC | 0.05  | 0.96  | 0.788 | 0.429 | 0.522 | 22.3  |
| 50 | MGM-PCStable | 100 | CC | 0.08  | 0.956 | 0.799 | 0.434 | 0.539 | 22.3  |
| 50 | MGM-PCStable | 300 | CC | 1e-04 | 0.989 | 0.762 | 0.453 | 0.469 | 24.6  |
| 50 | MGM-PCStable | 300 | CC | 0.001 | 0.989 | 0.786 | 0.459 | 0.503 | 24.15 |
| 50 | MGM-PCStable | 300 | CC | 0.01  | 0.986 | 0.817 | 0.473 | 0.55  | 23.35 |
| 50 | MGM-PCStable | 300 | CC | 0.03  | 0.982 | 0.82  | 0.47  | 0.553 | 23.55 |
| 50 | MGM-PCStable | 300 | CC | 0.05  | 0.982 | 0.828 | 0.472 | 0.563 | 23.3  |
| 50 | MGM-PCStable | 300 | CC | 0.08  | 0.977 | 0.83  | 0.471 | 0.567 | 23.4  |
| 50 | MGM-PCStable | 500 | CC | 1e-04 | 0.989 | 0.839 | 0.475 | 0.625 | 22.9  |
| 50 | MGM-PCStable | 500 | CC | 0.001 | 0.992 | 0.854 | 0.48  | 0.65  | 22.35 |
| 50 | MGM-PCStable | 500 | CC | 0.01  | 0.992 | 0.864 | 0.483 | 0.663 | 22.15 |
| 50 | MGM-PCStable | 500 | CC | 0.03  | 0.987 | 0.864 | 0.481 | 0.665 | 22.3  |
| 50 | MGM-PCStable | 500 | CC | 0.05  | 0.987 | 0.866 | 0.482 | 0.668 | 22.25 |
| 50 | MGM-PCStable | 500 | CC | 0.08  | 0.985 | 0.869 | 0.481 | 0.67  | 22.3  |
| 50 | FGES         | 100 | CC | 1     | 0.873 | 0.876 | 0.794 | 0.47  | 15.45 |
| 50 | FGES         | 100 | CC | 1.5   | 0.87  | 0.882 | 0.793 | 0.482 | 15.1  |
| 50 | FGES         | 100 | CC | 2     | 0.86  | 0.885 | 0.75  | 0.485 | 15.35 |
| 50 | FGES         | 100 | CC | 3     | 0.835 | 0.9   | 0.724 | 0.492 | 16.05 |
| 50 | FGES         | 100 | CC | 4     | 0.823 | 0.904 | 0.722 | 0.495 | 16.25 |
| 50 | FGES         | 100 | CC | 5     | 0.816 | 0.904 | 0.722 | 0.485 | 16.5  |
| 50 | FGES         | 300 | CC | 1     | 0.928 | 0.947 | 0.846 | 0.633 | 11.6  |
| 50 | FGES         | 300 | CC | 1.5   | 0.922 | 0.945 | 0.839 | 0.631 | 12    |
| 50 | FGES         | 300 | CC | 2     | 0.908 | 0.945 | 0.82  | 0.629 | 12.7  |
| 50 | FGES         | 300 | CC | 3     | 0.904 | 0.944 | 0.816 | 0.628 | 13.1  |
| 50 | FGES         | 300 | CC | 4     | 0.905 | 0.948 | 0.818 | 0.63  | 12.6  |
| 50 | FGES         | 300 | CC | 5     | 0.899 | 0.948 | 0.816 | 0.63  | 12.85 |
| 50 | FGES         | 500 | CC | 1     | 0.948 | 0.967 | 0.883 | 0.708 | 9.75  |
| 50 | FGES         | 500 | CC | 1.5   | 0.947 | 0.967 | 0.888 | 0.716 | 9.8   |
| 50 | FGES         | 500 | CC | 2     | 0.943 | 0.967 | 0.884 | 0.716 | 9.9   |
| 50 | FGES         | 500 | CC | 3     | 0.942 | 0.967 | 0.883 | 0.725 | 9.9   |
| 50 | FGES         | 500 | CC | 4     | 0.939 | 0.967 | 0.88  | 0.725 | 10    |
| 50 | FGES         | 500 | CC | 5     | 0.927 | 0.967 | 0.875 | 0.725 | 10.3  |
| 50 | MGM-PCMax    | 100 | CC | 1e-04 | 0.995 | 0.612 | 0.367 | 0.178 | 25.85 |
| 50 | MGM-PCMax    | 100 | CC | 0.001 | 0.996 | 0.676 | 0.423 | 0.225 | 24.55 |
| 50 | MGM-PCMax    | 100 | CC | 0.01  | 0.964 | 0.75  | 0.38  | 0.252 | 24    |
| 50 | MGM-PCMax    | 100 | CC | 0.03  | 0.958 | 0.768 | 0.372 | 0.26  | 23.9  |
| 50 | MGM-PCMax    | 100 | CC | 0.05  | 0.96  | 0.788 | 0.388 | 0.284 | 23.3  |
| 50 | MGM-PCMax    | 100 | CC | 0.08  | 0.956 | 0.799 | 0.383 | 0.283 | 23.4  |
| 50 | MGM-PCMax    | 300 | CC | 1e-04 | 0.987 | 0.762 | 0.347 | 0.208 | 26.1  |
| 50 | MGM-PCMax    | 300 | CC | 0.001 | 0.983 | 0.789 | 0.362 | 0.228 | 25.75 |
| 50 | MGM-PCMax    | 300 | CC | 0.01  | 0.984 | 0.817 | 0.361 | 0.243 | 25.4  |
| 50 | MGM-PCMax    | 300 | CC | 0.03  | 0.982 | 0.82  | 0.362 | 0.244 | 25.4  |

|    |               |     |    |       |       |       |       |       |       |
|----|---------------|-----|----|-------|-------|-------|-------|-------|-------|
| 50 | MGM-PCMax     | 300 | CC | 0.05  | 0.982 | 0.828 | 0.364 | 0.248 | 25.25 |
| 50 | MGM-PCMax     | 300 | CC | 0.08  | 0.977 | 0.83  | 0.369 | 0.256 | 25.15 |
| 50 | MGM-PCMax     | 500 | CC | 1e-04 | 0.989 | 0.839 | 0.366 | 0.271 | 24.25 |
| 50 | MGM-PCMax     | 500 | CC | 0.001 | 0.992 | 0.854 | 0.372 | 0.278 | 23.7  |
| 50 | MGM-PCMax     | 500 | CC | 0.01  | 0.992 | 0.864 | 0.37  | 0.284 | 23.65 |
| 50 | MGM-PCMax     | 500 | CC | 0.03  | 0.987 | 0.864 | 0.371 | 0.286 | 23.75 |
| 50 | MGM-PCMax     | 500 | CC | 0.05  | 0.987 | 0.866 | 0.375 | 0.291 | 23.55 |
| 50 | MGM-PCMax     | 500 | CC | 0.08  | 0.985 | 0.869 | 0.378 | 0.295 | 23.45 |
| 50 | Copula-PC     | 100 | CD | 1e-04 | 1     | 0.18  | 1     | 0.002 | 63.6  |
| 50 | Copula-PC     | 100 | CD | 0.001 | 0.957 | 0.224 | 1     | 0.004 | 62.55 |
| 50 | Copula-PC     | 100 | CD | 0.01  | 0.826 | 0.287 | 0.919 | 0.033 | 62.15 |
| 50 | Copula-PC     | 100 | CD | 0.03  | 0.72  | 0.351 | 0.807 | 0.052 | 64.3  |
| 50 | Copula-PC     | 100 | CD | 0.05  | 0.655 | 0.372 | 0.847 | 0.063 | 67    |
| 50 | Copula-PC     | 100 | CD | 0.08  | 0.572 | 0.394 | 0.684 | 0.075 | 73.2  |
| 50 | Copula-PC     | 300 | CD | 1e-04 | 0.984 | 0.351 | 0.917 | 0.03  | 63.45 |
| 50 | Copula-PC     | 300 | CD | 0.001 | 0.962 | 0.397 | 0.887 | 0.044 | 61.75 |
| 50 | Copula-PC     | 300 | CD | 0.01  | 0.871 | 0.468 | 0.867 | 0.103 | 60.45 |
| 50 | Copula-PC     | 300 | CD | 0.03  | 0.752 | 0.507 | 0.757 | 0.141 | 64.95 |
| 50 | Copula-PC     | 300 | CD | 0.05  | 0.692 | 0.538 | 0.729 | 0.156 | 69.05 |
| 50 | Copula-PC     | 300 | CD | 0.08  | 0.59  | 0.556 | 0.672 | 0.204 | 78.1  |
| 50 | Copula-PC     | 500 | CD | 1e-04 | 0.959 | 0.418 | 0.892 | 0.06  | 56.45 |
| 50 | Copula-PC     | 500 | CD | 0.001 | 0.92  | 0.471 | 0.819 | 0.087 | 55.6  |
| 50 | Copula-PC     | 500 | CD | 0.01  | 0.82  | 0.548 | 0.747 | 0.171 | 56.15 |
| 50 | Copula-PC     | 500 | CD | 0.03  | 0.715 | 0.588 | 0.669 | 0.217 | 62.6  |
| 50 | Copula-PC     | 500 | CD | 0.05  | 0.647 | 0.603 | 0.619 | 0.239 | 68.05 |
| 50 | Copula-PC     | 500 | CD | 0.08  | 0.575 | 0.619 | 0.587 | 0.273 | 76.1  |
| 50 | MGM-CPCStable | 100 | CD | 1e-04 | 1     | 0.401 | 1     | 0.001 | 57.15 |
| 50 | MGM-CPCStable | 100 | CD | 0.001 | 0.988 | 0.456 | 1     | 0.005 | 55.25 |
| 50 | MGM-CPCStable | 100 | CD | 0.01  | 0.966 | 0.519 | 1     | 0.015 | 53.25 |
| 50 | MGM-CPCStable | 100 | CD | 0.03  | 0.949 | 0.538 | 0.733 | 0.028 | 52.8  |
| 50 | MGM-CPCStable | 100 | CD | 0.05  | 0.944 | 0.547 | 0.818 | 0.034 | 52.6  |
| 50 | MGM-CPCStable | 100 | CD | 0.08  | 0.936 | 0.552 | 0.75  | 0.043 | 52.45 |
| 50 | MGM-CPCStable | 300 | CD | 1e-04 | 1     | 0.585 | 1     | 0.039 | 55    |
| 50 | MGM-CPCStable | 300 | CD | 0.001 | 0.998 | 0.618 | 1     | 0.059 | 53.45 |
| 50 | MGM-CPCStable | 300 | CD | 0.01  | 0.998 | 0.634 | 0.99  | 0.095 | 51.65 |
| 50 | MGM-CPCStable | 300 | CD | 0.03  | 0.996 | 0.645 | 0.971 | 0.131 | 50.35 |
| 50 | MGM-CPCStable | 300 | CD | 0.05  | 0.996 | 0.649 | 0.971 | 0.132 | 50.1  |
| 50 | MGM-CPCStable | 300 | CD | 0.08  | 0.996 | 0.651 | 0.975 | 0.148 | 49.55 |
| 50 | MGM-CPCStable | 500 | CD | 1e-04 | 0.998 | 0.652 | 0.988 | 0.106 | 45.7  |
| 50 | MGM-CPCStable | 500 | CD | 0.001 | 0.998 | 0.66  | 0.98  | 0.137 | 44.3  |
| 50 | MGM-CPCStable | 500 | CD | 0.01  | 0.998 | 0.674 | 1     | 0.188 | 41.9  |
| 50 | MGM-CPCStable | 500 | CD | 0.03  | 0.998 | 0.677 | 0.989 | 0.21  | 41    |
| 50 | MGM-CPCStable | 500 | CD | 0.05  | 0.998 | 0.68  | 0.955 | 0.216 | 40.85 |
| 50 | MGM-CPCStable | 500 | CD | 0.08  | 0.996 | 0.681 | 0.956 | 0.222 | 40.65 |
| 50 | MGM-PCStable  | 100 | CD | 1e-04 | 1     | 0.401 | 0.416 | 0.144 | 59.35 |

EVALUATION OF CAUSAL STRUCTURE LEARNING

|    |              |     |    |       |       |       |       |       |       |
|----|--------------|-----|----|-------|-------|-------|-------|-------|-------|
| 50 | MGM-PCStable | 100 | CD | 0.001 | 0.988 | 0.456 | 0.459 | 0.207 | 57.9  |
| 50 | MGM-PCStable | 100 | CD | 0.01  | 0.966 | 0.519 | 0.441 | 0.268 | 56.65 |
| 50 | MGM-PCStable | 100 | CD | 0.03  | 0.949 | 0.538 | 0.44  | 0.294 | 56.1  |
| 50 | MGM-PCStable | 100 | CD | 0.05  | 0.944 | 0.547 | 0.433 | 0.299 | 56.35 |
| 50 | MGM-PCStable | 100 | CD | 0.08  | 0.936 | 0.552 | 0.431 | 0.305 | 56.45 |
| 50 | MGM-PCStable | 300 | CD | 1e-04 | 1     | 0.585 | 0.495 | 0.416 | 57.3  |
| 50 | MGM-PCStable | 300 | CD | 0.001 | 0.998 | 0.618 | 0.489 | 0.449 | 56.4  |
| 50 | MGM-PCStable | 300 | CD | 0.01  | 0.998 | 0.634 | 0.493 | 0.47  | 55.55 |
| 50 | MGM-PCStable | 300 | CD | 0.03  | 0.996 | 0.645 | 0.492 | 0.481 | 55.35 |
| 50 | MGM-PCStable | 300 | CD | 0.05  | 0.996 | 0.649 | 0.498 | 0.489 | 54.9  |
| 50 | MGM-PCStable | 300 | CD | 0.08  | 0.996 | 0.651 | 0.497 | 0.492 | 54.85 |
| 50 | MGM-PCStable | 500 | CD | 1e-04 | 0.998 | 0.652 | 0.461 | 0.456 | 50.95 |
| 50 | MGM-PCStable | 500 | CD | 0.001 | 0.998 | 0.66  | 0.465 | 0.467 | 50.45 |
| 50 | MGM-PCStable | 500 | CD | 0.01  | 0.998 | 0.674 | 0.463 | 0.481 | 50.1  |
| 50 | MGM-PCStable | 500 | CD | 0.03  | 0.998 | 0.677 | 0.463 | 0.484 | 50    |
| 50 | MGM-PCStable | 500 | CD | 0.05  | 0.998 | 0.68  | 0.466 | 0.489 | 49.9  |
| 50 | MGM-PCStable | 500 | CD | 0.08  | 0.996 | 0.681 | 0.465 | 0.491 | 49.9  |
| 50 | FGES         | 100 | CD | 1     | 0.924 | 0.617 | 0.742 | 0.166 | 48.05 |
| 50 | FGES         | 100 | CD | 1.5   | 0.917 | 0.62  | 0.735 | 0.163 | 48.3  |
| 50 | FGES         | 100 | CD | 2     | 0.914 | 0.624 | 0.733 | 0.164 | 48.4  |
| 50 | FGES         | 100 | CD | 3     | 0.905 | 0.628 | 0.728 | 0.175 | 48.45 |
| 50 | FGES         | 100 | CD | 4     | 0.9   | 0.629 | 0.726 | 0.176 | 48.7  |
| 50 | FGES         | 100 | CD | 5     | 0.885 | 0.629 | 0.654 | 0.166 | 49.5  |
| 50 | FGES         | 300 | CD | 1     | 0.979 | 0.683 | 0.729 | 0.262 | 46.95 |
| 50 | FGES         | 300 | CD | 1.5   | 0.979 | 0.686 | 0.729 | 0.265 | 46.7  |
| 50 | FGES         | 300 | CD | 2     | 0.979 | 0.685 | 0.733 | 0.273 | 46.65 |
| 50 | FGES         | 300 | CD | 3     | 0.977 | 0.687 | 0.733 | 0.274 | 46.6  |
| 50 | FGES         | 300 | CD | 4     | 0.977 | 0.691 | 0.744 | 0.277 | 46.15 |
| 50 | FGES         | 300 | CD | 5     | 0.977 | 0.692 | 0.744 | 0.277 | 46.05 |
| 50 | FGES         | 500 | CD | 1     | 0.98  | 0.773 | 0.754 | 0.347 | 36.7  |
| 50 | FGES         | 500 | CD | 1.5   | 0.977 | 0.776 | 0.767 | 0.35  | 36.7  |
| 50 | FGES         | 500 | CD | 2     | 0.978 | 0.78  | 0.765 | 0.353 | 36.45 |
| 50 | FGES         | 500 | CD | 3     | 0.978 | 0.783 | 0.766 | 0.356 | 36.25 |
| 50 | FGES         | 500 | CD | 4     | 0.978 | 0.785 | 0.767 | 0.357 | 36.15 |
| 50 | FGES         | 500 | CD | 5     | 0.978 | 0.785 | 0.767 | 0.358 | 36.1  |
| 50 | MGM-PCMax    | 100 | CD | 1e-04 | 1     | 0.407 | 0.284 | 0.062 | 59.9  |
| 50 | MGM-PCMax    | 100 | CD | 0.001 | 0.988 | 0.46  | 0.287 | 0.081 | 59.1  |
| 50 | MGM-PCMax    | 100 | CD | 0.01  | 0.963 | 0.52  | 0.302 | 0.118 | 57.9  |
| 50 | MGM-PCMax    | 100 | CD | 0.03  | 0.949 | 0.54  | 0.331 | 0.135 | 57.25 |
| 50 | MGM-PCMax    | 100 | CD | 0.05  | 0.942 | 0.548 | 0.32  | 0.136 | 57.5  |
| 50 | MGM-PCMax    | 100 | CD | 0.08  | 0.936 | 0.552 | 0.33  | 0.14  | 57.45 |
| 50 | MGM-PCMax    | 300 | CD | 1e-04 | 1     | 0.585 | 0.456 | 0.212 | 58.1  |
| 50 | MGM-PCMax    | 300 | CD | 0.001 | 0.998 | 0.619 | 0.449 | 0.227 | 57.6  |
| 50 | MGM-PCMax    | 300 | CD | 0.01  | 0.998 | 0.634 | 0.47  | 0.243 | 55.9  |
| 50 | MGM-PCMax    | 300 | CD | 0.03  | 0.996 | 0.645 | 0.461 | 0.243 | 56.05 |

|    |               |     |    |       |       |       |       |       |       |
|----|---------------|-----|----|-------|-------|-------|-------|-------|-------|
| 50 | MGM-PCMax     | 300 | CD | 0.05  | 0.996 | 0.649 | 0.456 | 0.242 | 56.2  |
| 50 | MGM-PCMax     | 300 | CD | 0.08  | 0.996 | 0.651 | 0.452 | 0.242 | 56.15 |
| 50 | MGM-PCMax     | 500 | CD | 1e-04 | 0.995 | 0.652 | 0.359 | 0.195 | 54.85 |
| 50 | MGM-PCMax     | 500 | CD | 0.001 | 0.998 | 0.66  | 0.357 | 0.197 | 54.7  |
| 50 | MGM-PCMax     | 500 | CD | 0.01  | 0.998 | 0.674 | 0.375 | 0.212 | 53.8  |
| 50 | MGM-PCMax     | 500 | CD | 0.03  | 0.998 | 0.677 | 0.38  | 0.216 | 53.55 |
| 50 | MGM-PCMax     | 500 | CD | 0.05  | 0.998 | 0.68  | 0.373 | 0.215 | 53.7  |
| 50 | MGM-PCMax     | 500 | CD | 0.08  | 0.996 | 0.681 | 0.374 | 0.217 | 53.65 |
| 50 | Copula-PC     | 100 | DD | 1e-04 | 0.9   | 0.057 | NA    | 0     | 30.8  |
| 50 | Copula-PC     | 100 | DD | 0.001 | 0.933 | 0.094 | NA    | 0     | 30.15 |
| 50 | Copula-PC     | 100 | DD | 0.01  | 0.751 | 0.162 | 1     | 0.008 | 30    |
| 50 | Copula-PC     | 100 | DD | 0.03  | 0.684 | 0.203 | 1     | 0.007 | 31.2  |
| 50 | Copula-PC     | 100 | DD | 0.05  | 0.597 | 0.23  | 0.75  | 0.014 | 32.15 |
| 50 | Copula-PC     | 100 | DD | 0.08  | 0.495 | 0.269 | 0.556 | 0.02  | 34.75 |
| 50 | Copula-PC     | 300 | DD | 1e-04 | 0.954 | 0.187 | 0.5   | 0.002 | 36.1  |
| 50 | Copula-PC     | 300 | DD | 0.001 | 0.892 | 0.238 | 0.444 | 0.004 | 35.9  |
| 50 | Copula-PC     | 300 | DD | 0.01  | 0.718 | 0.327 | 0.483 | 0.017 | 37.35 |
| 50 | Copula-PC     | 300 | DD | 0.03  | 0.589 | 0.408 | 0.571 | 0.038 | 41.2  |
| 50 | Copula-PC     | 300 | DD | 0.05  | 0.493 | 0.423 | 0.507 | 0.051 | 46.1  |
| 50 | Copula-PC     | 300 | DD | 0.08  | 0.415 | 0.449 | 0.5   | 0.092 | 51.85 |
| 50 | Copula-PC     | 500 | DD | 1e-04 | 0.948 | 0.376 | 0.75  | 0.014 | 29.95 |
| 50 | Copula-PC     | 500 | DD | 0.001 | 0.879 | 0.449 | 0.814 | 0.046 | 29.8  |
| 50 | Copula-PC     | 500 | DD | 0.01  | 0.702 | 0.551 | 0.635 | 0.1   | 33.05 |
| 50 | Copula-PC     | 500 | DD | 0.03  | 0.607 | 0.605 | 0.566 | 0.155 | 37.25 |
| 50 | Copula-PC     | 500 | DD | 0.05  | 0.522 | 0.625 | 0.512 | 0.179 | 43.65 |
| 50 | Copula-PC     | 500 | DD | 0.08  | 0.448 | 0.668 | 0.443 | 0.232 | 51.2  |
| 50 | MGM-CPCStable | 100 | DD | 1e-04 | 1     | 0.281 | 1     | 0.003 | 28.15 |
| 50 | MGM-CPCStable | 100 | DD | 0.001 | 0.986 | 0.289 | 1     | 0.005 | 28.05 |
| 50 | MGM-CPCStable | 100 | DD | 0.01  | 0.947 | 0.302 | 0.833 | 0.012 | 27.95 |
| 50 | MGM-CPCStable | 100 | DD | 0.03  | 0.909 | 0.302 | 0.65  | 0.022 | 28.2  |
| 50 | MGM-CPCStable | 100 | DD | 0.05  | 0.909 | 0.302 | 0.667 | 0.025 | 28.15 |
| 50 | MGM-CPCStable | 100 | DD | 0.08  | 0.909 | 0.304 | 0.543 | 0.028 | 28.1  |
| 50 | MGM-CPCStable | 300 | DD | 1e-04 | 1     | 0.386 | 1     | 0.037 | 32.8  |
| 50 | MGM-CPCStable | 300 | DD | 0.001 | 1     | 0.386 | 1     | 0.05  | 32.6  |
| 50 | MGM-CPCStable | 300 | DD | 0.01  | 0.983 | 0.386 | 1     | 0.066 | 32.4  |
| 50 | MGM-CPCStable | 300 | DD | 0.03  | 0.979 | 0.386 | 1     | 0.085 | 32.2  |
| 50 | MGM-CPCStable | 300 | DD | 0.05  | 0.97  | 0.387 | 1     | 0.08  | 32.4  |
| 50 | MGM-CPCStable | 300 | DD | 0.08  | 0.967 | 0.387 | 0.909 | 0.085 | 32.5  |
| 50 | MGM-CPCStable | 500 | DD | 1e-04 | 0.992 | 0.452 | 1     | 0.047 | 28.95 |
| 50 | MGM-CPCStable | 500 | DD | 0.001 | 0.992 | 0.452 | 1     | 0.081 | 28.35 |
| 50 | MGM-CPCStable | 500 | DD | 0.01  | 0.979 | 0.452 | 1     | 0.119 | 27.9  |
| 50 | MGM-CPCStable | 500 | DD | 0.03  | 0.964 | 0.452 | 0.988 | 0.131 | 28.05 |
| 50 | MGM-CPCStable | 500 | DD | 0.05  | 0.96  | 0.452 | 0.974 | 0.136 | 28.1  |
| 50 | MGM-CPCStable | 500 | DD | 0.08  | 0.96  | 0.452 | 0.974 | 0.137 | 28.1  |
| 50 | MGM-PCStable  | 100 | DD | 1e-04 | 1     | 0.281 | 0.456 | 0.108 | 28.45 |



EVALUATION OF CAUSAL STRUCTURE LEARNING

|    |              |     |    |       |       |       |       |       |       |
|----|--------------|-----|----|-------|-------|-------|-------|-------|-------|
| 50 | MGM-PCStable | 100 | DD | 0.001 | 0.986 | 0.289 | 0.439 | 0.125 | 28.55 |
| 50 | MGM-PCStable | 100 | DD | 0.01  | 0.947 | 0.302 | 0.414 | 0.148 | 28.4  |
| 50 | MGM-PCStable | 100 | DD | 0.03  | 0.909 | 0.302 | 0.388 | 0.142 | 28.75 |
| 50 | MGM-PCStable | 100 | DD | 0.05  | 0.909 | 0.302 | 0.392 | 0.145 | 28.7  |
| 50 | MGM-PCStable | 100 | DD | 0.08  | 0.909 | 0.304 | 0.389 | 0.147 | 28.7  |
| 50 | MGM-PCStable | 300 | DD | 1e-04 | 1     | 0.386 | 0.402 | 0.216 | 33.85 |
| 50 | MGM-PCStable | 300 | DD | 0.001 | 1     | 0.386 | 0.391 | 0.218 | 34    |
| 50 | MGM-PCStable | 300 | DD | 0.01  | 0.983 | 0.386 | 0.393 | 0.219 | 34.1  |
| 50 | MGM-PCStable | 300 | DD | 0.03  | 0.979 | 0.386 | 0.388 | 0.219 | 34.25 |
| 50 | MGM-PCStable | 300 | DD | 0.05  | 0.97  | 0.387 | 0.395 | 0.221 | 34.4  |
| 50 | MGM-PCStable | 300 | DD | 0.08  | 0.967 | 0.387 | 0.396 | 0.224 | 34.45 |
| 50 | MGM-PCStable | 500 | DD | 1e-04 | 0.992 | 0.452 | 0.548 | 0.327 | 29.4  |
| 50 | MGM-PCStable | 500 | DD | 0.001 | 0.992 | 0.452 | 0.546 | 0.327 | 29.45 |
| 50 | MGM-PCStable | 500 | DD | 0.01  | 0.979 | 0.452 | 0.513 | 0.327 | 29.7  |
| 50 | MGM-PCStable | 500 | DD | 0.03  | 0.964 | 0.452 | 0.508 | 0.327 | 30    |
| 50 | MGM-PCStable | 500 | DD | 0.05  | 0.96  | 0.452 | 0.505 | 0.327 | 30.1  |
| 50 | MGM-PCStable | 500 | DD | 0.08  | 0.96  | 0.452 | 0.504 | 0.327 | 30.15 |
| 50 | FGES         | 100 | DD | 1     | 0.995 | 0.309 | 0.452 | 0.036 | 27.2  |
| 50 | FGES         | 100 | DD | 1.5   | 0.995 | 0.312 | 0.5   | 0.039 | 27.2  |
| 50 | FGES         | 100 | DD | 2     | 0.991 | 0.314 | 0.568 | 0.045 | 27.15 |
| 50 | FGES         | 100 | DD | 3     | 0.991 | 0.314 | 0.556 | 0.045 | 27.2  |
| 50 | FGES         | 100 | DD | 4     | 0.991 | 0.316 | 0.535 | 0.045 | 27.2  |
| 50 | FGES         | 100 | DD | 5     | 0.991 | 0.316 | 0.612 | 0.045 | 27.15 |
| 50 | FGES         | 300 | DD | 1     | 1     | 0.488 | 0.471 | 0.094 | 31.1  |
| 50 | FGES         | 300 | DD | 1.5   | 1     | 0.488 | 0.471 | 0.094 | 31.1  |
| 50 | FGES         | 300 | DD | 2     | 1     | 0.488 | 0.455 | 0.099 | 31.2  |
| 50 | FGES         | 300 | DD | 3     | 1     | 0.488 | 0.455 | 0.099 | 31.2  |
| 50 | FGES         | 300 | DD | 4     | 1     | 0.493 | 0.434 | 0.097 | 31.15 |
| 50 | FGES         | 300 | DD | 5     | 1     | 0.493 | 0.455 | 0.099 | 31.15 |
| 50 | FGES         | 500 | DD | 1     | 1     | 0.612 | 0.557 | 0.168 | 25.05 |
| 50 | FGES         | 500 | DD | 1.5   | 1     | 0.614 | 0.559 | 0.169 | 24.95 |
| 50 | FGES         | 500 | DD | 2     | 1     | 0.614 | 0.557 | 0.171 | 25    |
| 50 | FGES         | 500 | DD | 3     | 1     | 0.614 | 0.557 | 0.171 | 25    |
| 50 | FGES         | 500 | DD | 4     | 1     | 0.614 | 0.557 | 0.171 | 25    |
| 50 | FGES         | 500 | DD | 5     | 1     | 0.616 | 0.559 | 0.173 | 24.9  |
| 50 | MGM-PCMax    | 100 | DD | 1e-04 | 0.978 | 0.297 | 0.427 | 0.062 | 28.4  |
| 50 | MGM-PCMax    | 100 | DD | 0.001 | 0.968 | 0.299 | 0.332 | 0.059 | 28.8  |
| 50 | MGM-PCMax    | 100 | DD | 0.01  | 0.917 | 0.302 | 0.319 | 0.078 | 28.7  |
| 50 | MGM-PCMax    | 100 | DD | 0.03  | 0.902 | 0.302 | 0.311 | 0.08  | 28.9  |
| 50 | MGM-PCMax    | 100 | DD | 0.05  | 0.902 | 0.302 | 0.318 | 0.082 | 28.85 |
| 50 | MGM-PCMax    | 100 | DD | 0.08  | 0.909 | 0.304 | 0.305 | 0.079 | 28.85 |
| 50 | MGM-PCMax    | 300 | DD | 1e-04 | 1     | 0.386 | 0.24  | 0.073 | 35.4  |
| 50 | MGM-PCMax    | 300 | DD | 0.001 | 1     | 0.386 | 0.266 | 0.078 | 35.25 |
| 50 | MGM-PCMax    | 300 | DD | 0.01  | 0.983 | 0.386 | 0.251 | 0.076 | 35.55 |
| 50 | MGM-PCMax    | 300 | DD | 0.03  | 0.979 | 0.386 | 0.254 | 0.078 | 35.6  |

|     |               |     |     |       |       |       |       |       |        |
|-----|---------------|-----|-----|-------|-------|-------|-------|-------|--------|
| 50  | MGM-PCMax     | 300 | DD  | 0.05  | 0.97  | 0.387 | 0.268 | 0.079 | 35.7   |
| 50  | MGM-PCMax     | 300 | DD  | 0.08  | 0.967 | 0.387 | 0.27  | 0.082 | 35.75  |
| 50  | MGM-PCMax     | 500 | DD  | 1e-04 | 0.992 | 0.452 | 0.541 | 0.194 | 29.75  |
| 50  | MGM-PCMax     | 500 | DD  | 0.001 | 0.986 | 0.452 | 0.537 | 0.194 | 29.85  |
| 50  | MGM-PCMax     | 500 | DD  | 0.01  | 0.979 | 0.452 | 0.497 | 0.192 | 30.1   |
| 50  | MGM-PCMax     | 500 | DD  | 0.03  | 0.96  | 0.452 | 0.475 | 0.189 | 30.6   |
| 50  | MGM-PCMax     | 500 | DD  | 0.05  | 0.96  | 0.452 | 0.475 | 0.189 | 30.6   |
| 50  | MGM-PCMax     | 500 | DD  | 0.08  | 0.96  | 0.452 | 0.475 | 0.189 | 30.6   |
| 100 | Copula-PC     | 300 | All | 1e-04 | 0.979 | 0.438 | 0.991 | 0.073 | 225.1  |
| 100 | Copula-PC     | 300 | All | 0.001 | 0.954 | 0.484 | 0.969 | 0.103 | 217.2  |
| 100 | Copula-PC     | 300 | All | 0.01  | 0.831 | 0.555 | 0.893 | 0.146 | 221.55 |
| 100 | Copula-PC     | 300 | All | 0.03  | 0.693 | 0.593 | 0.841 | 0.182 | 249.6  |
| 100 | Copula-PC     | 300 | All | 0.05  | 0.601 | 0.609 | 0.761 | 0.208 | 284.5  |
| 100 | Copula-PC     | 300 | All | 0.08  | 0.513 | 0.627 | 0.7   | 0.235 | 334.1  |
| 100 | Copula-PC     | 500 | All | 1e-04 | 0.959 | 0.516 | 0.955 | 0.166 | 201.9  |
| 100 | Copula-PC     | 500 | All | 0.001 | 0.919 | 0.57  | 0.944 | 0.197 | 197.9  |
| 100 | Copula-PC     | 500 | All | 0.01  | 0.787 | 0.629 | 0.897 | 0.259 | 214.8  |
| 100 | Copula-PC     | 500 | All | 0.03  | 0.649 | 0.667 | 0.801 | 0.312 | 257.65 |
| 100 | Copula-PC     | 500 | All | 0.05  | 0.567 | 0.682 | 0.739 | 0.333 | 299.65 |
| 100 | Copula-PC     | 500 | All | 0.08  | 0.485 | 0.695 | 0.651 | 0.365 | 357.7  |
| 100 | MGM-CPCStable | 100 | All | 1e-04 | 0.989 | 0.409 | 0.958 | 0.016 | 210.25 |
| 100 | MGM-CPCStable | 100 | All | 0.001 | 0.985 | 0.465 | 0.942 | 0.028 | 201.65 |
| 100 | MGM-CPCStable | 100 | All | 0.01  | 0.954 | 0.521 | 0.981 | 0.055 | 193.9  |
| 100 | MGM-CPCStable | 100 | All | 0.03  | 0.943 | 0.549 | 0.924 | 0.071 | 190.5  |
| 100 | MGM-CPCStable | 100 | All | 0.05  | 0.94  | 0.562 | 0.917 | 0.087 | 187.1  |
| 100 | MGM-CPCStable | 100 | All | 0.08  | 0.931 | 0.571 | 0.905 | 0.096 | 186.2  |
| 100 | MGM-CPCStable | 300 | All | 1e-04 | 0.994 | 0.651 | 0.962 | 0.067 | 197.35 |
| 100 | MGM-CPCStable | 300 | All | 0.001 | 0.988 | 0.684 | 0.957 | 0.098 | 188.55 |
| 100 | MGM-CPCStable | 300 | All | 0.01  | 0.984 | 0.716 | 0.971 | 0.159 | 175.85 |
| 100 | MGM-CPCStable | 300 | All | 0.03  | 0.982 | 0.727 | 0.97  | 0.2   | 168.3  |
| 100 | MGM-CPCStable | 300 | All | 0.05  | 0.979 | 0.731 | 0.968 | 0.224 | 165    |
| 100 | MGM-CPCStable | 300 | All | 0.08  | 0.976 | 0.735 | 0.96  | 0.251 | 161.55 |
| 100 | MGM-CPCStable | 500 | All | 1e-04 | 0.997 | 0.706 | 0.986 | 0.187 | 165.95 |
| 100 | MGM-CPCStable | 500 | All | 0.001 | 0.995 | 0.723 | 0.984 | 0.231 | 157.4  |
| 100 | MGM-CPCStable | 500 | All | 0.01  | 0.992 | 0.737 | 0.993 | 0.288 | 147.75 |
| 100 | MGM-CPCStable | 500 | All | 0.03  | 0.987 | 0.742 | 0.987 | 0.329 | 142.2  |
| 100 | MGM-CPCStable | 500 | All | 0.05  | 0.984 | 0.743 | 0.981 | 0.345 | 140.7  |
| 100 | MGM-CPCStable | 500 | All | 0.08  | 0.979 | 0.746 | 0.977 | 0.359 | 139.5  |
| 100 | MGM-PCStable  | 100 | All | 1e-04 | 0.989 | 0.409 | 0.427 | 0.177 | 218.5  |
| 100 | MGM-PCStable  | 100 | All | 0.001 | 0.985 | 0.465 | 0.433 | 0.237 | 212.8  |
| 100 | MGM-PCStable  | 100 | All | 0.01  | 0.954 | 0.521 | 0.437 | 0.317 | 208.4  |
| 100 | MGM-PCStable  | 100 | All | 0.03  | 0.943 | 0.549 | 0.436 | 0.351 | 206.1  |
| 100 | MGM-PCStable  | 100 | All | 0.05  | 0.94  | 0.562 | 0.434 | 0.365 | 205.15 |
| 100 | MGM-PCStable  | 100 | All | 0.08  | 0.931 | 0.571 | 0.431 | 0.378 | 205.55 |
| 100 | MGM-PCStable  | 300 | All | 1e-04 | 0.994 | 0.651 | 0.477 | 0.459 | 212.25 |

EVALUATION OF CAUSAL STRUCTURE LEARNING

|     |              |     |     |       |       |       |       |       |        |
|-----|--------------|-----|-----|-------|-------|-------|-------|-------|--------|
| 100 | MGM-PCStable | 300 | All | 0.001 | 0.988 | 0.684 | 0.476 | 0.5   | 207.45 |
| 100 | MGM-PCStable | 300 | All | 0.01  | 0.984 | 0.716 | 0.481 | 0.545 | 201.7  |
| 100 | MGM-PCStable | 300 | All | 0.03  | 0.982 | 0.727 | 0.481 | 0.558 | 199.95 |
| 100 | MGM-PCStable | 300 | All | 0.05  | 0.979 | 0.731 | 0.48  | 0.562 | 200.1  |
| 100 | MGM-PCStable | 300 | All | 0.08  | 0.976 | 0.735 | 0.479 | 0.567 | 200.15 |
| 100 | MGM-PCStable | 500 | All | 1e-04 | 0.997 | 0.706 | 0.495 | 0.584 | 193.7  |
| 100 | MGM-PCStable | 500 | All | 0.001 | 0.995 | 0.723 | 0.496 | 0.607 | 190.8  |
| 100 | MGM-PCStable | 500 | All | 0.01  | 0.992 | 0.737 | 0.496 | 0.625 | 189.3  |
| 100 | MGM-PCStable | 500 | All | 0.03  | 0.987 | 0.742 | 0.494 | 0.634 | 189.35 |
| 100 | MGM-PCStable | 500 | All | 0.05  | 0.984 | 0.743 | 0.493 | 0.635 | 189.85 |
| 100 | MGM-PCStable | 500 | All | 0.08  | 0.979 | 0.746 | 0.491 | 0.636 | 190.65 |
| 100 | FGES         | 100 | All | 1     | 0.892 | 0.586 | 0.706 | 0.229 | 180.35 |
| 100 | FGES         | 100 | All | 1.5   | 0.879 | 0.59  | 0.693 | 0.237 | 181.5  |
| 100 | FGES         | 100 | All | 2     | 0.872 | 0.591 | 0.689 | 0.242 | 182.3  |
| 100 | FGES         | 100 | All | 3     | 0.861 | 0.595 | 0.67  | 0.245 | 183.9  |
| 100 | FGES         | 100 | All | 4     | 0.853 | 0.598 | 0.665 | 0.25  | 184.95 |
| 100 | FGES         | 100 | All | 5     | 0.844 | 0.6   | 0.655 | 0.261 | 185.65 |
| 100 | FGES         | 300 | All | 1     | 0.963 | 0.745 | 0.747 | 0.377 | 158.65 |
| 100 | FGES         | 300 | All | 1.5   | 0.96  | 0.746 | 0.745 | 0.379 | 158.9  |
| 100 | FGES         | 300 | All | 2     | 0.958 | 0.748 | 0.743 | 0.381 | 158.85 |
| 100 | FGES         | 300 | All | 3     | 0.952 | 0.749 | 0.741 | 0.381 | 159.65 |
| 100 | FGES         | 300 | All | 4     | 0.947 | 0.749 | 0.74  | 0.381 | 160.55 |
| 100 | FGES         | 300 | All | 5     | 0.943 | 0.749 | 0.736 | 0.381 | 161.4  |
| 100 | FGES         | 500 | All | 1     | 0.97  | 0.784 | 0.757 | 0.505 | 134.95 |
| 100 | FGES         | 500 | All | 1.5   | 0.967 | 0.786 | 0.755 | 0.506 | 135.1  |
| 100 | FGES         | 500 | All | 2     | 0.967 | 0.788 | 0.755 | 0.507 | 134.7  |
| 100 | FGES         | 500 | All | 3     | 0.964 | 0.789 | 0.752 | 0.509 | 135.4  |
| 100 | FGES         | 500 | All | 4     | 0.962 | 0.79  | 0.751 | 0.509 | 135.55 |
| 100 | FGES         | 500 | All | 5     | 0.96  | 0.791 | 0.75  | 0.511 | 135.8  |
| 100 | MGM-PCMax    | 100 | All | 1e-04 | 0.983 | 0.412 | 0.345 | 0.086 | 220.75 |
| 100 | MGM-PCMax    | 100 | All | 0.001 | 0.983 | 0.468 | 0.354 | 0.112 | 215.15 |
| 100 | MGM-PCMax    | 100 | All | 0.01  | 0.951 | 0.523 | 0.365 | 0.15  | 211.65 |
| 100 | MGM-PCMax    | 100 | All | 0.03  | 0.941 | 0.552 | 0.38  | 0.173 | 209.4  |
| 100 | MGM-PCMax    | 100 | All | 0.05  | 0.939 | 0.562 | 0.378 | 0.178 | 208.5  |
| 100 | MGM-PCMax    | 100 | All | 0.08  | 0.928 | 0.571 | 0.385 | 0.189 | 208.5  |
| 100 | MGM-PCMax    | 300 | All | 1e-04 | 0.99  | 0.653 | 0.39  | 0.21  | 221.2  |
| 100 | MGM-PCMax    | 300 | All | 0.001 | 0.986 | 0.684 | 0.392 | 0.228 | 216.15 |
| 100 | MGM-PCMax    | 300 | All | 0.01  | 0.984 | 0.717 | 0.404 | 0.251 | 210.45 |
| 100 | MGM-PCMax    | 300 | All | 0.03  | 0.982 | 0.728 | 0.405 | 0.258 | 208.9  |
| 100 | MGM-PCMax    | 300 | All | 0.05  | 0.979 | 0.731 | 0.407 | 0.263 | 208.45 |
| 100 | MGM-PCMax    | 300 | All | 0.08  | 0.976 | 0.735 | 0.408 | 0.266 | 207.9  |
| 100 | MGM-PCMax    | 500 | All | 1e-04 | 0.997 | 0.706 | 0.41  | 0.258 | 207.45 |
| 100 | MGM-PCMax    | 500 | All | 0.001 | 0.995 | 0.724 | 0.415 | 0.27  | 204.2  |
| 100 | MGM-PCMax    | 500 | All | 0.01  | 0.991 | 0.737 | 0.423 | 0.283 | 201.4  |
| 100 | MGM-PCMax    | 500 | All | 0.03  | 0.987 | 0.742 | 0.427 | 0.289 | 200.75 |

|     |               |     |     |       |       |       |       |       |        |
|-----|---------------|-----|-----|-------|-------|-------|-------|-------|--------|
| 100 | MGM-PCMax     | 500 | All | 0.05  | 0.984 | 0.743 | 0.424 | 0.29  | 201.6  |
| 100 | MGM-PCMax     | 500 | All | 0.08  | 0.979 | 0.746 | 0.426 | 0.294 | 201.65 |
| 100 | Copula-PC     | 300 | CC  | 1e-04 | 0.986 | 0.835 | 0.994 | 0.239 | 33     |
| 100 | Copula-PC     | 300 | CC  | 0.001 | 0.977 | 0.866 | 0.99  | 0.323 | 29.15  |
| 100 | Copula-PC     | 300 | CC  | 0.01  | 0.913 | 0.906 | 0.986 | 0.399 | 27.95  |
| 100 | Copula-PC     | 300 | CC  | 0.03  | 0.828 | 0.917 | 0.958 | 0.461 | 30.55  |
| 100 | Copula-PC     | 300 | CC  | 0.05  | 0.756 | 0.926 | 0.876 | 0.494 | 36     |
| 100 | Copula-PC     | 300 | CC  | 0.08  | 0.686 | 0.93  | 0.792 | 0.512 | 44.3   |
| 100 | Copula-PC     | 500 | CC  | 1e-04 | 0.982 | 0.9   | 0.978 | 0.461 | 25.95  |
| 100 | Copula-PC     | 500 | CC  | 0.001 | 0.975 | 0.914 | 0.977 | 0.501 | 24.2   |
| 100 | Copula-PC     | 500 | CC  | 0.01  | 0.934 | 0.944 | 0.967 | 0.573 | 23.4   |
| 100 | Copula-PC     | 500 | CC  | 0.03  | 0.888 | 0.952 | 0.943 | 0.622 | 25.25  |
| 100 | Copula-PC     | 500 | CC  | 0.05  | 0.83  | 0.953 | 0.918 | 0.635 | 30.3   |
| 100 | Copula-PC     | 500 | CC  | 0.08  | 0.772 | 0.954 | 0.879 | 0.643 | 36.45  |
| 100 | MGM-CPCStable | 100 | CC  | 1e-04 | 0.997 | 0.589 | 0.975 | 0.045 | 46.05  |
| 100 | MGM-CPCStable | 100 | CC  | 0.001 | 0.997 | 0.661 | 0.992 | 0.079 | 42.2   |
| 100 | MGM-CPCStable | 100 | CC  | 0.01  | 0.954 | 0.715 | 0.995 | 0.133 | 40     |
| 100 | MGM-CPCStable | 100 | CC  | 0.03  | 0.942 | 0.752 | 0.967 | 0.168 | 38.2   |
| 100 | MGM-CPCStable | 100 | CC  | 0.05  | 0.94  | 0.777 | 0.957 | 0.208 | 36.45  |
| 100 | MGM-CPCStable | 100 | CC  | 0.08  | 0.929 | 0.786 | 0.943 | 0.225 | 36.15  |
| 100 | MGM-CPCStable | 300 | CC  | 1e-04 | 0.996 | 0.788 | 0.969 | 0.189 | 36.5   |
| 100 | MGM-CPCStable | 300 | CC  | 0.001 | 0.982 | 0.831 | 0.974 | 0.251 | 33.25  |
| 100 | MGM-CPCStable | 300 | CC  | 0.01  | 0.974 | 0.871 | 0.959 | 0.331 | 29.5   |
| 100 | MGM-CPCStable | 300 | CC  | 0.03  | 0.972 | 0.888 | 0.957 | 0.379 | 27.4   |
| 100 | MGM-CPCStable | 300 | CC  | 0.05  | 0.97  | 0.892 | 0.957 | 0.399 | 26.6   |
| 100 | MGM-CPCStable | 300 | CC  | 0.08  | 0.966 | 0.898 | 0.959 | 0.423 | 25.75  |
| 100 | MGM-CPCStable | 500 | CC  | 1e-04 | 0.996 | 0.879 | 0.988 | 0.449 | 26.25  |
| 100 | MGM-CPCStable | 500 | CC  | 0.001 | 0.994 | 0.896 | 0.984 | 0.493 | 24.1   |
| 100 | MGM-CPCStable | 500 | CC  | 0.01  | 0.994 | 0.914 | 0.993 | 0.536 | 21.75  |
| 100 | MGM-CPCStable | 500 | CC  | 0.03  | 0.992 | 0.916 | 0.988 | 0.551 | 21.3   |
| 100 | MGM-CPCStable | 500 | CC  | 0.05  | 0.991 | 0.916 | 0.988 | 0.556 | 21.2   |
| 100 | MGM-CPCStable | 500 | CC  | 0.08  | 0.985 | 0.92  | 0.989 | 0.564 | 21     |
| 100 | MGM-PCStable  | 100 | CC  | 1e-04 | 0.997 | 0.589 | 0.436 | 0.27  | 49.75  |
| 100 | MGM-PCStable  | 100 | CC  | 0.001 | 0.997 | 0.661 | 0.447 | 0.362 | 47.45  |
| 100 | MGM-PCStable  | 100 | CC  | 0.01  | 0.954 | 0.715 | 0.444 | 0.454 | 46.75  |
| 100 | MGM-PCStable  | 100 | CC  | 0.03  | 0.942 | 0.752 | 0.441 | 0.503 | 45.95  |
| 100 | MGM-PCStable  | 100 | CC  | 0.05  | 0.94  | 0.777 | 0.438 | 0.529 | 45.65  |
| 100 | MGM-PCStable  | 100 | CC  | 0.08  | 0.929 | 0.786 | 0.434 | 0.548 | 45.95  |
| 100 | MGM-PCStable  | 300 | CC  | 1e-04 | 0.996 | 0.788 | 0.483 | 0.554 | 43.9   |
| 100 | MGM-PCStable  | 300 | CC  | 0.001 | 0.982 | 0.831 | 0.476 | 0.613 | 42.5   |
| 100 | MGM-PCStable  | 300 | CC  | 0.01  | 0.974 | 0.871 | 0.482 | 0.677 | 40.5   |
| 100 | MGM-PCStable  | 300 | CC  | 0.03  | 0.972 | 0.888 | 0.479 | 0.695 | 40.05  |
| 100 | MGM-PCStable  | 300 | CC  | 0.05  | 0.97  | 0.892 | 0.479 | 0.7   | 39.95  |
| 100 | MGM-PCStable  | 300 | CC  | 0.08  | 0.966 | 0.898 | 0.479 | 0.71  | 39.85  |
| 100 | MGM-PCStable  | 500 | CC  | 1e-04 | 0.996 | 0.879 | 0.498 | 0.756 | 42.7   |

EVALUATION OF CAUSAL STRUCTURE LEARNING

|     |              |     |    |       |       |       |       |       |        |
|-----|--------------|-----|----|-------|-------|-------|-------|-------|--------|
| 100 | MGM-PCStable | 500 | CC | 0.001 | 0.994 | 0.896 | 0.501 | 0.787 | 41.8   |
| 100 | MGM-PCStable | 500 | CC | 0.01  | 0.994 | 0.914 | 0.501 | 0.813 | 41.05  |
| 100 | MGM-PCStable | 500 | CC | 0.03  | 0.992 | 0.916 | 0.499 | 0.814 | 41.2   |
| 100 | MGM-PCStable | 500 | CC | 0.05  | 0.991 | 0.916 | 0.498 | 0.814 | 41.3   |
| 100 | MGM-PCStable | 500 | CC | 0.08  | 0.985 | 0.92  | 0.496 | 0.815 | 41.65  |
| 100 | FGES         | 100 | CC | 1     | 0.876 | 0.858 | 0.797 | 0.498 | 29.5   |
| 100 | FGES         | 100 | CC | 1.5   | 0.86  | 0.86  | 0.77  | 0.505 | 30.3   |
| 100 | FGES         | 100 | CC | 2     | 0.853 | 0.866 | 0.774 | 0.515 | 30.45  |
| 100 | FGES         | 100 | CC | 3     | 0.843 | 0.867 | 0.756 | 0.52  | 31.25  |
| 100 | FGES         | 100 | CC | 4     | 0.835 | 0.87  | 0.749 | 0.528 | 31.6   |
| 100 | FGES         | 100 | CC | 5     | 0.822 | 0.873 | 0.726 | 0.544 | 32     |
| 100 | FGES         | 300 | CC | 1     | 0.924 | 0.95  | 0.837 | 0.625 | 22.4   |
| 100 | FGES         | 300 | CC | 1.5   | 0.918 | 0.95  | 0.831 | 0.626 | 22.85  |
| 100 | FGES         | 300 | CC | 2     | 0.916 | 0.951 | 0.827 | 0.63  | 22.8   |
| 100 | FGES         | 300 | CC | 3     | 0.905 | 0.951 | 0.823 | 0.63  | 23.4   |
| 100 | FGES         | 300 | CC | 4     | 0.892 | 0.951 | 0.82  | 0.629 | 24.2   |
| 100 | FGES         | 300 | CC | 5     | 0.883 | 0.951 | 0.811 | 0.629 | 24.8   |
| 100 | FGES         | 500 | CC | 1     | 0.944 | 0.983 | 0.857 | 0.779 | 16.3   |
| 100 | FGES         | 500 | CC | 1.5   | 0.938 | 0.984 | 0.855 | 0.78  | 16.6   |
| 100 | FGES         | 500 | CC | 2     | 0.938 | 0.986 | 0.855 | 0.782 | 16.4   |
| 100 | FGES         | 500 | CC | 3     | 0.928 | 0.985 | 0.85  | 0.783 | 17.25  |
| 100 | FGES         | 500 | CC | 4     | 0.923 | 0.987 | 0.846 | 0.785 | 17.55  |
| 100 | FGES         | 500 | CC | 5     | 0.921 | 0.987 | 0.844 | 0.785 | 17.75  |
| 100 | MGM-PCMax    | 100 | CC | 1e-04 | 0.994 | 0.591 | 0.352 | 0.148 | 50.35  |
| 100 | MGM-PCMax    | 100 | CC | 0.001 | 0.996 | 0.661 | 0.368 | 0.186 | 48.15  |
| 100 | MGM-PCMax    | 100 | CC | 0.01  | 0.947 | 0.715 | 0.393 | 0.236 | 47.25  |
| 100 | MGM-PCMax    | 100 | CC | 0.03  | 0.939 | 0.755 | 0.388 | 0.258 | 46.75  |
| 100 | MGM-PCMax    | 100 | CC | 0.05  | 0.938 | 0.777 | 0.378 | 0.267 | 46.6   |
| 100 | MGM-PCMax    | 100 | CC | 0.08  | 0.926 | 0.786 | 0.381 | 0.276 | 46.8   |
| 100 | MGM-PCMax    | 300 | CC | 1e-04 | 0.993 | 0.792 | 0.438 | 0.29  | 45     |
| 100 | MGM-PCMax    | 300 | CC | 0.001 | 0.979 | 0.833 | 0.418 | 0.307 | 43.7   |
| 100 | MGM-PCMax    | 300 | CC | 0.01  | 0.974 | 0.873 | 0.422 | 0.331 | 42.05  |
| 100 | MGM-PCMax    | 300 | CC | 0.03  | 0.972 | 0.889 | 0.423 | 0.344 | 41.45  |
| 100 | MGM-PCMax    | 300 | CC | 0.05  | 0.969 | 0.892 | 0.42  | 0.346 | 41.65  |
| 100 | MGM-PCMax    | 300 | CC | 0.08  | 0.965 | 0.898 | 0.421 | 0.352 | 41.45  |
| 100 | MGM-PCMax    | 500 | CC | 1e-04 | 0.996 | 0.879 | 0.45  | 0.363 | 45.1   |
| 100 | MGM-PCMax    | 500 | CC | 0.001 | 0.994 | 0.896 | 0.45  | 0.37  | 44.45  |
| 100 | MGM-PCMax    | 500 | CC | 0.01  | 0.991 | 0.914 | 0.451 | 0.383 | 43.75  |
| 100 | MGM-PCMax    | 500 | CC | 0.03  | 0.991 | 0.916 | 0.446 | 0.378 | 44.1   |
| 100 | MGM-PCMax    | 500 | CC | 0.05  | 0.99  | 0.916 | 0.438 | 0.373 | 44.7   |
| 100 | MGM-PCMax    | 500 | CC | 0.08  | 0.984 | 0.92  | 0.442 | 0.382 | 44.55  |
| 100 | Copula-PC    | 300 | CD | 1e-04 | 0.977 | 0.38  | 0.981 | 0.033 | 125.85 |
| 100 | Copula-PC    | 300 | CD | 0.001 | 0.938 | 0.431 | 0.949 | 0.054 | 122.85 |
| 100 | Copula-PC    | 300 | CD | 0.01  | 0.818 | 0.504 | 0.875 | 0.096 | 125.1  |
| 100 | Copula-PC    | 300 | CD | 0.03  | 0.669 | 0.548 | 0.828 | 0.133 | 141.3  |

|     |               |     |    |       |       |       |       |       |        |
|-----|---------------|-----|----|-------|-------|-------|-------|-------|--------|
| 100 | Copula-PC     | 300 | CD | 0.05  | 0.584 | 0.568 | 0.713 | 0.16  | 158.6  |
| 100 | Copula-PC     | 300 | CD | 0.08  | 0.504 | 0.588 | 0.651 | 0.189 | 182.7  |
| 100 | Copula-PC     | 500 | CD | 1e-04 | 0.958 | 0.416 | 0.905 | 0.088 | 112.65 |
| 100 | Copula-PC     | 500 | CD | 0.001 | 0.922 | 0.465 | 0.944 | 0.119 | 110.05 |
| 100 | Copula-PC     | 500 | CD | 0.01  | 0.805 | 0.525 | 0.882 | 0.182 | 113.6  |
| 100 | Copula-PC     | 500 | CD | 0.03  | 0.672 | 0.576 | 0.782 | 0.237 | 128.9  |
| 100 | Copula-PC     | 500 | CD | 0.05  | 0.587 | 0.592 | 0.742 | 0.264 | 146.3  |
| 100 | Copula-PC     | 500 | CD | 0.08  | 0.499 | 0.609 | 0.659 | 0.3   | 172.35 |
| 100 | MGM-CPCStable | 100 | CD | 1e-04 | 0.976 | 0.348 | 1     | 0.003 | 110    |
| 100 | MGM-CPCStable | 100 | CD | 0.001 | 0.972 | 0.413 | 0.875 | 0.011 | 105.75 |
| 100 | MGM-CPCStable | 100 | CD | 0.01  | 0.942 | 0.489 | 0.962 | 0.03  | 101.1  |
| 100 | MGM-CPCStable | 100 | CD | 0.03  | 0.935 | 0.526 | 0.847 | 0.04  | 99.4   |
| 100 | MGM-CPCStable | 100 | CD | 0.05  | 0.932 | 0.539 | 0.863 | 0.052 | 97.8   |
| 100 | MGM-CPCStable | 100 | CD | 0.08  | 0.924 | 0.551 | 0.874 | 0.06  | 97.3   |
| 100 | MGM-CPCStable | 300 | CD | 1e-04 | 0.996 | 0.655 | 0.928 | 0.033 | 105.35 |
| 100 | MGM-CPCStable | 300 | CD | 0.001 | 0.994 | 0.696 | 0.942 | 0.055 | 100.05 |
| 100 | MGM-CPCStable | 300 | CD | 0.01  | 0.993 | 0.739 | 0.973 | 0.111 | 92.75  |
| 100 | MGM-CPCStable | 300 | CD | 0.03  | 0.991 | 0.753 | 0.98  | 0.157 | 87.95  |
| 100 | MGM-CPCStable | 300 | CD | 0.05  | 0.991 | 0.758 | 0.978 | 0.187 | 85.4   |
| 100 | MGM-CPCStable | 300 | CD | 0.08  | 0.99  | 0.762 | 0.967 | 0.218 | 83.05  |
| 100 | MGM-CPCStable | 500 | CD | 1e-04 | 0.997 | 0.696 | 0.984 | 0.102 | 89.15  |
| 100 | MGM-CPCStable | 500 | CD | 0.001 | 0.996 | 0.722 | 0.99  | 0.147 | 84.1   |
| 100 | MGM-CPCStable | 500 | CD | 0.01  | 0.994 | 0.737 | 0.997 | 0.215 | 78.05  |
| 100 | MGM-CPCStable | 500 | CD | 0.03  | 0.991 | 0.747 | 0.991 | 0.275 | 73.35  |
| 100 | MGM-CPCStable | 500 | CD | 0.05  | 0.988 | 0.75  | 0.978 | 0.295 | 72.15  |
| 100 | MGM-CPCStable | 500 | CD | 0.08  | 0.983 | 0.751 | 0.973 | 0.315 | 71.3   |
| 100 | MGM-PCStable  | 100 | CD | 1e-04 | 0.976 | 0.348 | 0.406 | 0.151 | 112.9  |
| 100 | MGM-PCStable  | 100 | CD | 0.001 | 0.972 | 0.413 | 0.411 | 0.208 | 109.75 |
| 100 | MGM-PCStable  | 100 | CD | 0.01  | 0.942 | 0.489 | 0.422 | 0.298 | 107.05 |
| 100 | MGM-PCStable  | 100 | CD | 0.03  | 0.935 | 0.526 | 0.426 | 0.339 | 105.5  |
| 100 | MGM-PCStable  | 100 | CD | 0.05  | 0.932 | 0.539 | 0.426 | 0.352 | 104.85 |
| 100 | MGM-PCStable  | 100 | CD | 0.08  | 0.924 | 0.551 | 0.425 | 0.367 | 104.85 |
| 100 | MGM-PCStable  | 300 | CD | 1e-04 | 0.996 | 0.655 | 0.477 | 0.474 | 111.05 |
| 100 | MGM-PCStable  | 300 | CD | 0.001 | 0.994 | 0.696 | 0.482 | 0.525 | 107.1  |
| 100 | MGM-PCStable  | 300 | CD | 0.01  | 0.993 | 0.739 | 0.486 | 0.573 | 103.4  |
| 100 | MGM-PCStable  | 300 | CD | 0.03  | 0.991 | 0.753 | 0.487 | 0.59  | 102.05 |
| 100 | MGM-PCStable  | 300 | CD | 0.05  | 0.991 | 0.758 | 0.487 | 0.595 | 101.8  |
| 100 | MGM-PCStable  | 300 | CD | 0.08  | 0.99  | 0.762 | 0.486 | 0.599 | 101.6  |
| 100 | MGM-PCStable  | 500 | CD | 1e-04 | 0.997 | 0.696 | 0.491 | 0.583 | 97.8   |
| 100 | MGM-PCStable  | 500 | CD | 0.001 | 0.996 | 0.722 | 0.492 | 0.609 | 95.7   |
| 100 | MGM-PCStable  | 500 | CD | 0.01  | 0.994 | 0.737 | 0.492 | 0.629 | 94.55  |
| 100 | MGM-PCStable  | 500 | CD | 0.03  | 0.991 | 0.747 | 0.492 | 0.643 | 93.9   |
| 100 | MGM-PCStable  | 500 | CD | 0.05  | 0.988 | 0.75  | 0.491 | 0.646 | 94     |
| 100 | MGM-PCStable  | 500 | CD | 0.08  | 0.983 | 0.751 | 0.49  | 0.647 | 94.4   |
| 100 | FGES          | 100 | CD | 1     | 0.878 | 0.57  | 0.576 | 0.168 | 97.65  |

EVALUATION OF CAUSAL STRUCTURE LEARNING

|     |           |     |    |       |       |       |       |       |        |
|-----|-----------|-----|----|-------|-------|-------|-------|-------|--------|
| 100 | FGES      | 100 | CD | 1.5   | 0.865 | 0.576 | 0.578 | 0.178 | 98.1   |
| 100 | FGES      | 100 | CD | 2     | 0.857 | 0.576 | 0.569 | 0.181 | 98.75  |
| 100 | FGES      | 100 | CD | 3     | 0.844 | 0.58  | 0.547 | 0.185 | 99.7   |
| 100 | FGES      | 100 | CD | 4     | 0.835 | 0.583 | 0.543 | 0.191 | 100.3  |
| 100 | FGES      | 100 | CD | 5     | 0.825 | 0.585 | 0.568 | 0.204 | 100.9  |
| 100 | FGES      | 300 | CD | 1     | 0.977 | 0.775 | 0.717 | 0.377 | 81.15  |
| 100 | FGES      | 300 | CD | 1.5   | 0.974 | 0.778 | 0.716 | 0.379 | 80.95  |
| 100 | FGES      | 300 | CD | 2     | 0.971 | 0.781 | 0.714 | 0.381 | 80.95  |
| 100 | FGES      | 300 | CD | 3     | 0.968 | 0.782 | 0.713 | 0.381 | 81.15  |
| 100 | FGES      | 300 | CD | 4     | 0.966 | 0.782 | 0.712 | 0.382 | 81.25  |
| 100 | FGES      | 300 | CD | 5     | 0.964 | 0.782 | 0.711 | 0.382 | 81.45  |
| 100 | FGES      | 500 | CD | 1     | 0.977 | 0.783 | 0.74  | 0.495 | 68.05  |
| 100 | FGES      | 500 | CD | 1.5   | 0.975 | 0.786 | 0.738 | 0.496 | 67.9   |
| 100 | FGES      | 500 | CD | 2     | 0.975 | 0.788 | 0.737 | 0.497 | 67.7   |
| 100 | FGES      | 500 | CD | 3     | 0.975 | 0.79  | 0.736 | 0.5   | 67.6   |
| 100 | FGES      | 500 | CD | 4     | 0.975 | 0.792 | 0.736 | 0.5   | 67.45  |
| 100 | FGES      | 500 | CD | 5     | 0.972 | 0.793 | 0.736 | 0.503 | 67.5   |
| 100 | MGM-PCMax | 100 | CD | 1e-04 | 0.971 | 0.353 | 0.344 | 0.072 | 113.5  |
| 100 | MGM-PCMax | 100 | CD | 0.001 | 0.972 | 0.419 | 0.345 | 0.099 | 110.5  |
| 100 | MGM-PCMax | 100 | CD | 0.01  | 0.939 | 0.492 | 0.344 | 0.137 | 108.55 |
| 100 | MGM-PCMax | 100 | CD | 0.03  | 0.932 | 0.529 | 0.387 | 0.169 | 106.55 |
| 100 | MGM-PCMax | 100 | CD | 0.05  | 0.931 | 0.539 | 0.393 | 0.176 | 105.55 |
| 100 | MGM-PCMax | 100 | CD | 0.08  | 0.923 | 0.551 | 0.41  | 0.19  | 105.1  |
| 100 | MGM-PCMax | 300 | CD | 1e-04 | 0.994 | 0.657 | 0.386 | 0.212 | 115.8  |
| 100 | MGM-PCMax | 300 | CD | 0.001 | 0.993 | 0.697 | 0.392 | 0.234 | 112.2  |
| 100 | MGM-PCMax | 300 | CD | 0.01  | 0.993 | 0.74  | 0.409 | 0.265 | 108.3  |
| 100 | MGM-PCMax | 300 | CD | 0.03  | 0.991 | 0.754 | 0.414 | 0.274 | 106.8  |
| 100 | MGM-PCMax | 300 | CD | 0.05  | 0.991 | 0.758 | 0.419 | 0.281 | 105.85 |
| 100 | MGM-PCMax | 300 | CD | 0.08  | 0.99  | 0.762 | 0.421 | 0.284 | 105.25 |
| 100 | MGM-PCMax | 500 | CD | 1e-04 | 0.997 | 0.696 | 0.404 | 0.254 | 104.3  |
| 100 | MGM-PCMax | 500 | CD | 0.001 | 0.996 | 0.722 | 0.417 | 0.275 | 101.5  |
| 100 | MGM-PCMax | 500 | CD | 0.01  | 0.994 | 0.738 | 0.431 | 0.294 | 99.05  |
| 100 | MGM-PCMax | 500 | CD | 0.03  | 0.991 | 0.748 | 0.439 | 0.305 | 98     |
| 100 | MGM-PCMax | 500 | CD | 0.05  | 0.988 | 0.75  | 0.439 | 0.308 | 98.05  |
| 100 | MGM-PCMax | 500 | CD | 0.08  | 0.982 | 0.751 | 0.438 | 0.31  | 98.35  |
| 100 | Copula-PC | 300 | DD | 1e-04 | 0.961 | 0.185 | NA    | 0     | 66.25  |
| 100 | Copula-PC | 300 | DD | 0.001 | 0.926 | 0.234 | 0.25  | 0.001 | 65.2   |
| 100 | Copula-PC | 300 | DD | 0.01  | 0.696 | 0.336 | 0.622 | 0.015 | 68.5   |
| 100 | Copula-PC | 300 | DD | 0.03  | 0.534 | 0.382 | 0.414 | 0.021 | 77.75  |
| 100 | Copula-PC | 300 | DD | 0.05  | 0.426 | 0.4   | 0.389 | 0.034 | 89.9   |
| 100 | Copula-PC | 300 | DD | 0.08  | 0.332 | 0.425 | 0.37  | 0.065 | 107.1  |
| 100 | Copula-PC | 500 | DD | 1e-04 | 0.893 | 0.319 | 0.727 | 0.016 | 63.3   |
| 100 | Copula-PC | 500 | DD | 0.001 | 0.802 | 0.425 | 0.639 | 0.032 | 63.65  |
| 100 | Copula-PC | 500 | DD | 0.01  | 0.574 | 0.514 | 0.586 | 0.077 | 77.8   |
| 100 | Copula-PC | 500 | DD | 0.03  | 0.412 | 0.558 | 0.46  | 0.136 | 103.5  |

|     |               |     |    |       |       |       |       |       |        |
|-----|---------------|-----|----|-------|-------|-------|-------|-------|--------|
| 100 | Copula-PC     | 500 | DD | 0.05  | 0.348 | 0.586 | 0.369 | 0.15  | 123.05 |
| 100 | Copula-PC     | 500 | DD | 0.08  | 0.287 | 0.603 | 0.319 | 0.198 | 148.9  |
| 100 | MGM-CPCStable | 100 | DD | 1e-04 | 1     | 0.36  | 0.667 | 0.007 | 54.2   |
| 100 | MGM-CPCStable | 100 | DD | 0.001 | 0.992 | 0.382 | 0.5   | 0.008 | 53.7   |
| 100 | MGM-CPCStable | 100 | DD | 0.01  | 0.986 | 0.402 | 0.931 | 0.021 | 52.8   |
| 100 | MGM-CPCStable | 100 | DD | 0.03  | 0.978 | 0.406 | 0.832 | 0.031 | 52.9   |
| 100 | MGM-CPCStable | 100 | DD | 0.05  | 0.97  | 0.408 | 0.792 | 0.032 | 52.85  |
| 100 | MGM-CPCStable | 100 | DD | 0.08  | 0.96  | 0.409 | 0.801 | 0.04  | 52.75  |
| 100 | MGM-CPCStable | 300 | DD | 1e-04 | 0.976 | 0.522 | 1     | 0.024 | 55.5   |
| 100 | MGM-CPCStable | 300 | DD | 0.001 | 0.965 | 0.524 | 0.928 | 0.046 | 55.25  |
| 100 | MGM-CPCStable | 300 | DD | 0.01  | 0.954 | 0.526 | 0.978 | 0.098 | 53.6   |
| 100 | MGM-CPCStable | 300 | DD | 0.03  | 0.949 | 0.527 | 0.967 | 0.125 | 52.95  |
| 100 | MGM-CPCStable | 300 | DD | 0.05  | 0.937 | 0.527 | 0.957 | 0.138 | 53     |
| 100 | MGM-CPCStable | 300 | DD | 0.08  | 0.926 | 0.529 | 0.947 | 0.157 | 52.75  |
| 100 | MGM-CPCStable | 500 | DD | 1e-04 | 0.998 | 0.545 | 0.986 | 0.085 | 50.55  |
| 100 | MGM-CPCStable | 500 | DD | 0.001 | 0.994 | 0.545 | 0.981 | 0.128 | 49.2   |
| 100 | MGM-CPCStable | 500 | DD | 0.01  | 0.981 | 0.546 | 0.99  | 0.172 | 47.95  |
| 100 | MGM-CPCStable | 500 | DD | 0.03  | 0.961 | 0.546 | 0.98  | 0.202 | 47.55  |
| 100 | MGM-CPCStable | 500 | DD | 0.05  | 0.955 | 0.546 | 0.976 | 0.22  | 47.35  |
| 100 | MGM-CPCStable | 500 | DD | 0.08  | 0.952 | 0.547 | 0.964 | 0.226 | 47.2   |
| 100 | MGM-PCStable  | 100 | DD | 1e-04 | 1     | 0.36  | 0.422 | 0.132 | 55.85  |
| 100 | MGM-PCStable  | 100 | DD | 0.001 | 0.992 | 0.382 | 0.407 | 0.165 | 55.6   |
| 100 | MGM-PCStable  | 100 | DD | 0.01  | 0.986 | 0.402 | 0.42  | 0.214 | 54.6   |
| 100 | MGM-PCStable  | 100 | DD | 0.03  | 0.978 | 0.406 | 0.419 | 0.221 | 54.65  |
| 100 | MGM-PCStable  | 100 | DD | 0.05  | 0.97  | 0.408 | 0.42  | 0.226 | 54.65  |
| 100 | MGM-PCStable  | 100 | DD | 0.08  | 0.96  | 0.409 | 0.42  | 0.232 | 54.75  |
| 100 | MGM-PCStable  | 300 | DD | 1e-04 | 0.976 | 0.522 | 0.457 | 0.336 | 57.3   |
| 100 | MGM-PCStable  | 300 | DD | 0.001 | 0.965 | 0.524 | 0.445 | 0.341 | 57.85  |
| 100 | MGM-PCStable  | 300 | DD | 0.01  | 0.954 | 0.526 | 0.444 | 0.357 | 57.8   |
| 100 | MGM-PCStable  | 300 | DD | 0.03  | 0.949 | 0.527 | 0.445 | 0.36  | 57.85  |
| 100 | MGM-PCStable  | 300 | DD | 0.05  | 0.937 | 0.527 | 0.44  | 0.36  | 58.35  |
| 100 | MGM-PCStable  | 300 | DD | 0.08  | 0.926 | 0.529 | 0.434 | 0.362 | 58.7   |
| 100 | MGM-PCStable  | 500 | DD | 1e-04 | 0.998 | 0.545 | 0.503 | 0.407 | 53.2   |
| 100 | MGM-PCStable  | 500 | DD | 0.001 | 0.994 | 0.545 | 0.503 | 0.409 | 53.3   |
| 100 | MGM-PCStable  | 500 | DD | 0.01  | 0.981 | 0.546 | 0.498 | 0.414 | 53.7   |
| 100 | MGM-PCStable  | 500 | DD | 0.03  | 0.961 | 0.546 | 0.486 | 0.417 | 54.25  |
| 100 | MGM-PCStable  | 500 | DD | 0.05  | 0.955 | 0.546 | 0.483 | 0.417 | 54.55  |
| 100 | MGM-PCStable  | 500 | DD | 0.08  | 0.952 | 0.547 | 0.482 | 0.418 | 54.6   |
| 100 | FGES          | 100 | DD | 1     | 0.998 | 0.352 | 0.605 | 0.081 | 53.2   |
| 100 | FGES          | 100 | DD | 1.5   | 0.995 | 0.353 | 0.628 | 0.086 | 53.1   |
| 100 | FGES          | 100 | DD | 2     | 0.993 | 0.355 | 0.624 | 0.088 | 53.1   |
| 100 | FGES          | 100 | DD | 3     | 0.993 | 0.361 | 0.622 | 0.089 | 52.95  |
| 100 | FGES          | 100 | DD | 4     | 0.991 | 0.362 | 0.613 | 0.091 | 53.05  |
| 100 | FGES          | 100 | DD | 5     | 0.995 | 0.363 | 0.618 | 0.092 | 52.75  |
| 100 | FGES          | 300 | DD | 1     | 1     | 0.49  | 0.616 | 0.141 | 55.1   |



EVALUATION OF CAUSAL STRUCTURE LEARNING

|     |           |     |    |       |       |       |       |       |       |
|-----|-----------|-----|----|-------|-------|-------|-------|-------|-------|
| 100 | FGES      | 300 | DD | 1.5   | 1     | 0.49  | 0.616 | 0.141 | 55.1  |
| 100 | FGES      | 300 | DD | 2     | 1     | 0.492 | 0.606 | 0.141 | 55.1  |
| 100 | FGES      | 300 | DD | 3     | 1     | 0.492 | 0.606 | 0.141 | 55.1  |
| 100 | FGES      | 300 | DD | 4     | 1     | 0.492 | 0.606 | 0.141 | 55.1  |
| 100 | FGES      | 300 | DD | 5     | 1     | 0.492 | 0.597 | 0.143 | 55.15 |
| 100 | FGES      | 500 | DD | 1     | 1     | 0.579 | 0.548 | 0.232 | 50.6  |
| 100 | FGES      | 500 | DD | 1.5   | 1     | 0.579 | 0.548 | 0.232 | 50.6  |
| 100 | FGES      | 500 | DD | 2     | 1     | 0.579 | 0.548 | 0.232 | 50.6  |
| 100 | FGES      | 500 | DD | 3     | 1     | 0.58  | 0.548 | 0.233 | 50.55 |
| 100 | FGES      | 500 | DD | 4     | 1     | 0.58  | 0.548 | 0.233 | 50.55 |
| 100 | FGES      | 500 | DD | 5     | 1     | 0.583 | 0.544 | 0.233 | 50.55 |
| 100 | MGM-PCMax | 100 | DD | 1e-04 | 0.988 | 0.36  | 0.301 | 0.051 | 56.9  |
| 100 | MGM-PCMax | 100 | DD | 0.001 | 0.984 | 0.382 | 0.292 | 0.062 | 56.5  |
| 100 | MGM-PCMax | 100 | DD | 0.01  | 0.989 | 0.402 | 0.303 | 0.086 | 55.85 |
| 100 | MGM-PCMax | 100 | DD | 0.03  | 0.978 | 0.406 | 0.297 | 0.092 | 56.1  |
| 100 | MGM-PCMax | 100 | DD | 0.05  | 0.97  | 0.407 | 0.293 | 0.095 | 56.35 |
| 100 | MGM-PCMax | 100 | DD | 0.08  | 0.953 | 0.409 | 0.291 | 0.098 | 56.6  |
| 100 | MGM-PCMax | 300 | DD | 1e-04 | 0.96  | 0.522 | 0.307 | 0.125 | 60.4  |
| 100 | MGM-PCMax | 300 | DD | 0.001 | 0.961 | 0.524 | 0.313 | 0.13  | 60.25 |
| 100 | MGM-PCMax | 300 | DD | 0.01  | 0.954 | 0.526 | 0.323 | 0.141 | 60.1  |
| 100 | MGM-PCMax | 300 | DD | 0.03  | 0.948 | 0.527 | 0.314 | 0.139 | 60.65 |
| 100 | MGM-PCMax | 300 | DD | 0.05  | 0.937 | 0.527 | 0.315 | 0.14  | 60.95 |
| 100 | MGM-PCMax | 300 | DD | 0.08  | 0.926 | 0.529 | 0.315 | 0.143 | 61.2  |
| 100 | MGM-PCMax | 500 | DD | 1e-04 | 0.998 | 0.545 | 0.35  | 0.155 | 58.05 |
| 100 | MGM-PCMax | 500 | DD | 0.001 | 0.994 | 0.545 | 0.346 | 0.154 | 58.25 |
| 100 | MGM-PCMax | 500 | DD | 0.01  | 0.977 | 0.546 | 0.347 | 0.156 | 58.6  |
| 100 | MGM-PCMax | 500 | DD | 0.03  | 0.961 | 0.546 | 0.352 | 0.162 | 58.65 |
| 100 | MGM-PCMax | 500 | DD | 0.05  | 0.955 | 0.546 | 0.352 | 0.163 | 58.85 |
| 100 | MGM-PCMax | 500 | DD | 0.08  | 0.952 | 0.547 | 0.357 | 0.165 | 58.75 |

Table 8: Comparison of mixed data structure learning algorithms with Lee and Hastie Simulated data with average density 2.5

| Num_Vars | Algorithm | Sample.Size | Type | Parameter | AP    | AR    | AHP   | AHR   | SHD    |
|----------|-----------|-------------|------|-----------|-------|-------|-------|-------|--------|
| 50       | Copula-PC | 100         | All  | 1e-04     | 0.979 | 0.154 | 0.875 | 0.008 | 217.25 |
| 50       | Copula-PC | 100         | All  | 0.001     | 0.964 | 0.192 | 0.886 | 0.019 | 212.75 |
| 50       | Copula-PC | 100         | All  | 0.01      | 0.918 | 0.25  | 0.873 | 0.036 | 207.8  |
| 50       | Copula-PC | 100         | All  | 0.03      | 0.857 | 0.288 | 0.837 | 0.056 | 207.1  |
| 50       | Copula-PC | 100         | All  | 0.05      | 0.803 | 0.309 | 0.809 | 0.066 | 210.1  |
| 50       | Copula-PC | 100         | All  | 0.08      | 0.742 | 0.332 | 0.776 | 0.075 | 215.2  |
| 50       | Copula-PC | 300         | All  | 1e-04     | 0.978 | 0.318 | 0.964 | 0.073 | 191.75 |
| 50       | Copula-PC | 300         | All  | 0.001     | 0.956 | 0.362 | 0.937 | 0.095 | 187.05 |
| 50       | Copula-PC | 300         | All  | 0.01      | 0.898 | 0.414 | 0.889 | 0.144 | 182.35 |
| 50       | Copula-PC | 300         | All  | 0.03      | 0.846 | 0.455 | 0.858 | 0.175 | 182.9  |
| 50       | Copula-PC | 300         | All  | 0.05      | 0.799 | 0.477 | 0.815 | 0.196 | 187.5  |

|    |               |     |     |       |       |       |       |       |        |
|----|---------------|-----|-----|-------|-------|-------|-------|-------|--------|
| 50 | Copula-PC     | 300 | All | 0.08  | 0.744 | 0.497 | 0.782 | 0.214 | 194.95 |
| 50 | Copula-PC     | 500 | All | 1e-04 | 0.939 | 0.395 | 0.871 | 0.123 | 197.4  |
| 50 | Copula-PC     | 500 | All | 0.001 | 0.923 | 0.442 | 0.861 | 0.159 | 190.25 |
| 50 | Copula-PC     | 500 | All | 0.01  | 0.873 | 0.495 | 0.801 | 0.208 | 187.5  |
| 50 | Copula-PC     | 500 | All | 0.03  | 0.818 | 0.524 | 0.756 | 0.244 | 191.75 |
| 50 | Copula-PC     | 500 | All | 0.05  | 0.784 | 0.54  | 0.746 | 0.265 | 195.05 |
| 50 | Copula-PC     | 500 | All | 0.08  | 0.743 | 0.557 | 0.726 | 0.293 | 200.95 |
| 50 | MGM-CPCStable | 100 | All | 1e-04 | 0.977 | 0.234 | 1     | 0.011 | 209    |
| 50 | MGM-CPCStable | 100 | All | 0.001 | 0.966 | 0.26  | 0.727 | 0.01  | 207.2  |
| 50 | MGM-CPCStable | 100 | All | 0.01  | 0.946 | 0.292 | 0.85  | 0.022 | 204.25 |
| 50 | MGM-CPCStable | 100 | All | 0.03  | 0.931 | 0.303 | 0.845 | 0.033 | 203.2  |
| 50 | MGM-CPCStable | 100 | All | 0.05  | 0.928 | 0.309 | 0.88  | 0.038 | 202.4  |
| 50 | MGM-CPCStable | 100 | All | 0.08  | 0.915 | 0.314 | 0.808 | 0.039 | 203.3  |
| 50 | MGM-CPCStable | 300 | All | 1e-04 | 0.986 | 0.388 | 0.963 | 0.054 | 185.75 |
| 50 | MGM-CPCStable | 300 | All | 0.001 | 0.984 | 0.402 | 0.941 | 0.072 | 182.65 |
| 50 | MGM-CPCStable | 300 | All | 0.01  | 0.969 | 0.416 | 0.946 | 0.1   | 179.8  |
| 50 | MGM-CPCStable | 300 | All | 0.03  | 0.965 | 0.423 | 0.954 | 0.119 | 177.45 |
| 50 | MGM-CPCStable | 300 | All | 0.05  | 0.961 | 0.424 | 0.94  | 0.123 | 177.6  |
| 50 | MGM-CPCStable | 300 | All | 0.08  | 0.953 | 0.426 | 0.928 | 0.133 | 177.1  |
| 50 | MGM-CPCStable | 500 | All | 1e-04 | 0.963 | 0.401 | 0.915 | 0.079 | 198.9  |
| 50 | MGM-CPCStable | 500 | All | 0.001 | 0.959 | 0.408 | 0.898 | 0.092 | 197.45 |
| 50 | MGM-CPCStable | 500 | All | 0.01  | 0.955 | 0.416 | 0.9   | 0.109 | 195.25 |
| 50 | MGM-CPCStable | 500 | All | 0.03  | 0.951 | 0.418 | 0.897 | 0.12  | 194.3  |
| 50 | MGM-CPCStable | 500 | All | 0.05  | 0.947 | 0.419 | 0.905 | 0.126 | 193.85 |
| 50 | MGM-CPCStable | 500 | All | 0.08  | 0.942 | 0.42  | 0.914 | 0.13  | 193.75 |
| 50 | MGM-PCStable  | 100 | All | 1e-04 | 0.977 | 0.234 | 0.374 | 0.099 | 216.1  |
| 50 | MGM-PCStable  | 100 | All | 0.001 | 0.966 | 0.26  | 0.379 | 0.126 | 214.85 |
| 50 | MGM-PCStable  | 100 | All | 0.01  | 0.946 | 0.292 | 0.385 | 0.165 | 213.25 |
| 50 | MGM-PCStable  | 100 | All | 0.03  | 0.931 | 0.303 | 0.385 | 0.18  | 213.1  |
| 50 | MGM-PCStable  | 100 | All | 0.05  | 0.928 | 0.309 | 0.386 | 0.187 | 212.75 |
| 50 | MGM-PCStable  | 100 | All | 0.08  | 0.915 | 0.314 | 0.381 | 0.19  | 213.5  |
| 50 | MGM-PCStable  | 300 | All | 1e-04 | 0.986 | 0.388 | 0.443 | 0.272 | 197.5  |
| 50 | MGM-PCStable  | 300 | All | 0.001 | 0.984 | 0.402 | 0.446 | 0.288 | 196.05 |
| 50 | MGM-PCStable  | 300 | All | 0.01  | 0.969 | 0.416 | 0.445 | 0.308 | 195.3  |
| 50 | MGM-PCStable  | 300 | All | 0.03  | 0.965 | 0.423 | 0.445 | 0.316 | 194.75 |
| 50 | MGM-PCStable  | 300 | All | 0.05  | 0.961 | 0.424 | 0.442 | 0.317 | 195.15 |
| 50 | MGM-PCStable  | 300 | All | 0.08  | 0.953 | 0.426 | 0.439 | 0.32  | 195.7  |
| 50 | MGM-PCStable  | 500 | All | 1e-04 | 0.963 | 0.401 | 0.446 | 0.306 | 212.35 |
| 50 | MGM-PCStable  | 500 | All | 0.001 | 0.959 | 0.408 | 0.446 | 0.313 | 212.05 |
| 50 | MGM-PCStable  | 500 | All | 0.01  | 0.955 | 0.416 | 0.445 | 0.321 | 211.75 |
| 50 | MGM-PCStable  | 500 | All | 0.03  | 0.951 | 0.418 | 0.442 | 0.322 | 212    |
| 50 | MGM-PCStable  | 500 | All | 0.05  | 0.947 | 0.419 | 0.441 | 0.324 | 212.2  |
| 50 | MGM-PCStable  | 500 | All | 0.08  | 0.942 | 0.42  | 0.439 | 0.326 | 212.65 |
| 50 | FGES          | 100 | All | 1     | 0.881 | 0.418 | 0.658 | 0.213 | 184.3  |
| 50 | FGES          | 100 | All | 1.5   | 0.876 | 0.423 | 0.648 | 0.219 | 184.35 |

EVALUATION OF CAUSAL STRUCTURE LEARNING

|    |           |     |     |       |       |       |       |       |        |
|----|-----------|-----|-----|-------|-------|-------|-------|-------|--------|
| 50 | FGES      | 100 | All | 2     | 0.871 | 0.427 | 0.644 | 0.22  | 184.65 |
| 50 | FGES      | 100 | All | 3     | 0.869 | 0.43  | 0.643 | 0.223 | 184.6  |
| 50 | FGES      | 100 | All | 4     | 0.864 | 0.432 | 0.638 | 0.224 | 185.05 |
| 50 | FGES      | 100 | All | 5     | 0.862 | 0.433 | 0.635 | 0.225 | 185.2  |
| 50 | FGES      | 300 | All | 1     | 0.927 | 0.583 | 0.723 | 0.363 | 149.05 |
| 50 | FGES      | 300 | All | 1.5   | 0.927 | 0.584 | 0.719 | 0.368 | 148.75 |
| 50 | FGES      | 300 | All | 2     | 0.926 | 0.585 | 0.719 | 0.368 | 148.65 |
| 50 | FGES      | 300 | All | 3     | 0.925 | 0.587 | 0.723 | 0.37  | 148.45 |
| 50 | FGES      | 300 | All | 4     | 0.923 | 0.588 | 0.721 | 0.373 | 148.4  |
| 50 | FGES      | 300 | All | 5     | 0.921 | 0.589 | 0.72  | 0.373 | 148.65 |
| 50 | FGES      | 500 | All | 1     | 0.909 | 0.625 | 0.728 | 0.432 | 152.5  |
| 50 | FGES      | 500 | All | 1.5   | 0.91  | 0.626 | 0.728 | 0.432 | 152.2  |
| 50 | FGES      | 500 | All | 2     | 0.909 | 0.628 | 0.728 | 0.434 | 152.05 |
| 50 | FGES      | 500 | All | 3     | 0.908 | 0.629 | 0.728 | 0.43  | 152.35 |
| 50 | FGES      | 500 | All | 4     | 0.905 | 0.629 | 0.725 | 0.43  | 152.85 |
| 50 | FGES      | 500 | All | 5     | 0.903 | 0.63  | 0.723 | 0.43  | 153.1  |
| 50 | MGM-PCMax | 100 | All | 1e-04 | 0.955 | 0.237 | 0.322 | 0.058 | 217.15 |
| 50 | MGM-PCMax | 100 | All | 0.001 | 0.953 | 0.262 | 0.35  | 0.075 | 214.35 |
| 50 | MGM-PCMax | 100 | All | 0.01  | 0.941 | 0.293 | 0.354 | 0.092 | 212.7  |
| 50 | MGM-PCMax | 100 | All | 0.03  | 0.929 | 0.304 | 0.36  | 0.1   | 212.25 |
| 50 | MGM-PCMax | 100 | All | 0.05  | 0.927 | 0.311 | 0.372 | 0.107 | 211.15 |
| 50 | MGM-PCMax | 100 | All | 0.08  | 0.914 | 0.314 | 0.365 | 0.108 | 212.1  |
| 50 | MGM-PCMax | 300 | All | 1e-04 | 0.978 | 0.389 | 0.385 | 0.136 | 199.45 |
| 50 | MGM-PCMax | 300 | All | 0.001 | 0.98  | 0.402 | 0.397 | 0.146 | 197.2  |
| 50 | MGM-PCMax | 300 | All | 0.01  | 0.966 | 0.417 | 0.404 | 0.159 | 196    |
| 50 | MGM-PCMax | 300 | All | 0.03  | 0.963 | 0.424 | 0.41  | 0.165 | 195.1  |
| 50 | MGM-PCMax | 300 | All | 0.05  | 0.96  | 0.425 | 0.412 | 0.166 | 195    |
| 50 | MGM-PCMax | 300 | All | 0.08  | 0.952 | 0.427 | 0.41  | 0.168 | 195.6  |
| 50 | MGM-PCMax | 500 | All | 1e-04 | 0.963 | 0.402 | 0.426 | 0.159 | 211.45 |
| 50 | MGM-PCMax | 500 | All | 0.001 | 0.959 | 0.408 | 0.43  | 0.164 | 210.6  |
| 50 | MGM-PCMax | 500 | All | 0.01  | 0.955 | 0.417 | 0.432 | 0.17  | 210    |
| 50 | MGM-PCMax | 500 | All | 0.03  | 0.95  | 0.419 | 0.439 | 0.174 | 209.5  |
| 50 | MGM-PCMax | 500 | All | 0.05  | 0.944 | 0.419 | 0.433 | 0.174 | 210.25 |
| 50 | MGM-PCMax | 500 | All | 0.08  | 0.94  | 0.42  | 0.432 | 0.175 | 210.6  |
| 50 | Copula-PC | 100 | CC  | 1e-04 | 0.978 | 0.429 | 0.875 | 0.029 | 45.25  |
| 50 | Copula-PC | 100 | CC  | 0.001 | 0.965 | 0.507 | 0.899 | 0.073 | 42.7   |
| 50 | Copula-PC | 100 | CC  | 0.01  | 0.949 | 0.592 | 0.9   | 0.131 | 39.5   |
| 50 | Copula-PC | 100 | CC  | 0.03  | 0.919 | 0.634 | 0.881 | 0.181 | 38.15  |
| 50 | Copula-PC | 100 | CC  | 0.05  | 0.886 | 0.652 | 0.875 | 0.204 | 38.55  |
| 50 | Copula-PC | 100 | CC  | 0.08  | 0.845 | 0.667 | 0.914 | 0.235 | 39.05  |
| 50 | Copula-PC | 300 | CC  | 1e-04 | 0.973 | 0.69  | 0.968 | 0.274 | 31.25  |
| 50 | Copula-PC | 300 | CC  | 0.001 | 0.969 | 0.736 | 0.962 | 0.317 | 29.1   |
| 50 | Copula-PC | 300 | CC  | 0.01  | 0.957 | 0.784 | 0.943 | 0.428 | 25.4   |
| 50 | Copula-PC | 300 | CC  | 0.03  | 0.921 | 0.807 | 0.931 | 0.473 | 25     |
| 50 | Copula-PC | 300 | CC  | 0.05  | 0.906 | 0.819 | 0.925 | 0.512 | 24.55  |

|    |               |     |    |       |       |       |       |       |       |
|----|---------------|-----|----|-------|-------|-------|-------|-------|-------|
| 50 | Copula-PC     | 300 | CC | 0.08  | 0.89  | 0.838 | 0.903 | 0.524 | 24.55 |
| 50 | Copula-PC     | 500 | CC | 1e-04 | 0.939 | 0.7   | 0.892 | 0.342 | 36.05 |
| 50 | Copula-PC     | 500 | CC | 0.001 | 0.941 | 0.735 | 0.873 | 0.399 | 33.5  |
| 50 | Copula-PC     | 500 | CC | 0.01  | 0.937 | 0.764 | 0.875 | 0.487 | 29.95 |
| 50 | Copula-PC     | 500 | CC | 0.03  | 0.918 | 0.78  | 0.859 | 0.52  | 29.95 |
| 50 | Copula-PC     | 500 | CC | 0.05  | 0.916 | 0.786 | 0.857 | 0.541 | 29.2  |
| 50 | Copula-PC     | 500 | CC | 0.08  | 0.884 | 0.797 | 0.847 | 0.566 | 29.8  |
| 50 | MGM-CPCStable | 100 | CC | 1e-04 | 0.991 | 0.4   | 1     | 0.038 | 45.55 |
| 50 | MGM-CPCStable | 100 | CC | 0.001 | 0.986 | 0.435 | 0.767 | 0.038 | 44.85 |
| 50 | MGM-CPCStable | 100 | CC | 0.01  | 0.96  | 0.491 | 0.764 | 0.064 | 43.7  |
| 50 | MGM-CPCStable | 100 | CC | 0.03  | 0.955 | 0.513 | 0.808 | 0.101 | 42.4  |
| 50 | MGM-CPCStable | 100 | CC | 0.05  | 0.949 | 0.524 | 0.891 | 0.116 | 41.95 |
| 50 | MGM-CPCStable | 100 | CC | 0.08  | 0.931 | 0.529 | 0.907 | 0.12  | 42.4  |
| 50 | MGM-CPCStable | 300 | CC | 1e-04 | 0.987 | 0.608 | 0.979 | 0.191 | 34.6  |
| 50 | MGM-CPCStable | 300 | CC | 0.001 | 0.99  | 0.636 | 0.962 | 0.224 | 33.15 |
| 50 | MGM-CPCStable | 300 | CC | 0.01  | 0.977 | 0.652 | 0.967 | 0.282 | 32.05 |
| 50 | MGM-CPCStable | 300 | CC | 0.03  | 0.977 | 0.657 | 0.972 | 0.307 | 31.4  |
| 50 | MGM-CPCStable | 300 | CC | 0.05  | 0.974 | 0.659 | 0.964 | 0.306 | 31.55 |
| 50 | MGM-CPCStable | 300 | CC | 0.08  | 0.969 | 0.662 | 0.974 | 0.311 | 31.4  |
| 50 | MGM-CPCStable | 500 | CC | 1e-04 | 0.962 | 0.582 | 0.908 | 0.207 | 42.4  |
| 50 | MGM-CPCStable | 500 | CC | 0.001 | 0.962 | 0.588 | 0.895 | 0.224 | 41.9  |
| 50 | MGM-CPCStable | 500 | CC | 0.01  | 0.963 | 0.593 | 0.898 | 0.238 | 41.35 |
| 50 | MGM-CPCStable | 500 | CC | 0.03  | 0.965 | 0.598 | 0.902 | 0.246 | 40.85 |
| 50 | MGM-CPCStable | 500 | CC | 0.05  | 0.965 | 0.598 | 0.898 | 0.248 | 40.85 |
| 50 | MGM-CPCStable | 500 | CC | 0.08  | 0.957 | 0.601 | 0.902 | 0.251 | 40.95 |
| 50 | MGM-PCStable  | 100 | CC | 1e-04 | 0.991 | 0.4   | 0.418 | 0.207 | 48.7  |
| 50 | MGM-PCStable  | 100 | CC | 0.001 | 0.986 | 0.435 | 0.4   | 0.245 | 48.35 |
| 50 | MGM-PCStable  | 100 | CC | 0.01  | 0.96  | 0.491 | 0.407 | 0.32  | 47.6  |
| 50 | MGM-PCStable  | 100 | CC | 0.03  | 0.955 | 0.513 | 0.411 | 0.346 | 47.05 |
| 50 | MGM-PCStable  | 100 | CC | 0.05  | 0.949 | 0.524 | 0.413 | 0.36  | 46.9  |
| 50 | MGM-PCStable  | 100 | CC | 0.08  | 0.931 | 0.529 | 0.406 | 0.368 | 47.4  |
| 50 | MGM-PCStable  | 300 | CC | 1e-04 | 0.987 | 0.608 | 0.483 | 0.496 | 39.65 |
| 50 | MGM-PCStable  | 300 | CC | 0.001 | 0.99  | 0.636 | 0.485 | 0.524 | 38.95 |
| 50 | MGM-PCStable  | 300 | CC | 0.01  | 0.977 | 0.652 | 0.484 | 0.554 | 38.8  |
| 50 | MGM-PCStable  | 300 | CC | 0.03  | 0.977 | 0.657 | 0.484 | 0.56  | 38.6  |
| 50 | MGM-PCStable  | 300 | CC | 0.05  | 0.974 | 0.659 | 0.483 | 0.562 | 38.65 |
| 50 | MGM-PCStable  | 300 | CC | 0.08  | 0.969 | 0.662 | 0.481 | 0.572 | 38.65 |
| 50 | MGM-PCStable  | 500 | CC | 1e-04 | 0.962 | 0.582 | 0.458 | 0.471 | 48.55 |
| 50 | MGM-PCStable  | 500 | CC | 0.001 | 0.962 | 0.588 | 0.456 | 0.479 | 48.45 |
| 50 | MGM-PCStable  | 500 | CC | 0.01  | 0.963 | 0.593 | 0.456 | 0.485 | 48.35 |
| 50 | MGM-PCStable  | 500 | CC | 0.03  | 0.965 | 0.598 | 0.457 | 0.49  | 48.15 |
| 50 | MGM-PCStable  | 500 | CC | 0.05  | 0.965 | 0.598 | 0.457 | 0.493 | 48.1  |
| 50 | MGM-PCStable  | 500 | CC | 0.08  | 0.957 | 0.601 | 0.456 | 0.495 | 48.3  |
| 50 | FGES          | 100 | CC | 1     | 0.841 | 0.719 | 0.661 | 0.468 | 35.95 |
| 50 | FGES          | 100 | CC | 1.5   | 0.835 | 0.729 | 0.65  | 0.476 | 36.15 |

EVALUATION OF CAUSAL STRUCTURE LEARNING

|    |           |     |    |       |       |       |       |       |        |
|----|-----------|-----|----|-------|-------|-------|-------|-------|--------|
| 50 | FGES      | 100 | CC | 2     | 0.826 | 0.73  | 0.644 | 0.478 | 36.55  |
| 50 | FGES      | 100 | CC | 3     | 0.823 | 0.73  | 0.645 | 0.481 | 36.7   |
| 50 | FGES      | 100 | CC | 4     | 0.815 | 0.734 | 0.636 | 0.485 | 36.95  |
| 50 | FGES      | 100 | CC | 5     | 0.812 | 0.734 | 0.632 | 0.485 | 37.2   |
| 50 | FGES      | 300 | CC | 1     | 0.86  | 0.885 | 0.729 | 0.651 | 26.15  |
| 50 | FGES      | 300 | CC | 1.5   | 0.859 | 0.887 | 0.725 | 0.657 | 26.15  |
| 50 | FGES      | 300 | CC | 2     | 0.858 | 0.887 | 0.724 | 0.657 | 26.25  |
| 50 | FGES      | 300 | CC | 3     | 0.856 | 0.887 | 0.721 | 0.657 | 26.45  |
| 50 | FGES      | 300 | CC | 4     | 0.85  | 0.889 | 0.717 | 0.665 | 26.55  |
| 50 | FGES      | 300 | CC | 5     | 0.847 | 0.889 | 0.715 | 0.665 | 26.75  |
| 50 | FGES      | 500 | CC | 1     | 0.83  | 0.873 | 0.698 | 0.673 | 32.9   |
| 50 | FGES      | 500 | CC | 1.5   | 0.83  | 0.875 | 0.697 | 0.673 | 32.9   |
| 50 | FGES      | 500 | CC | 2     | 0.83  | 0.876 | 0.697 | 0.675 | 32.9   |
| 50 | FGES      | 500 | CC | 3     | 0.827 | 0.875 | 0.698 | 0.675 | 33.1   |
| 50 | FGES      | 500 | CC | 4     | 0.82  | 0.877 | 0.693 | 0.675 | 33.5   |
| 50 | FGES      | 500 | CC | 5     | 0.814 | 0.877 | 0.688 | 0.675 | 33.9   |
| 50 | MGM-PCMax | 100 | CC | 1e-04 | 0.982 | 0.403 | 0.353 | 0.111 | 49     |
| 50 | MGM-PCMax | 100 | CC | 0.001 | 0.974 | 0.442 | 0.376 | 0.144 | 47.7   |
| 50 | MGM-PCMax | 100 | CC | 0.01  | 0.955 | 0.493 | 0.399 | 0.185 | 46.6   |
| 50 | MGM-PCMax | 100 | CC | 0.03  | 0.951 | 0.514 | 0.409 | 0.203 | 46.05  |
| 50 | MGM-PCMax | 100 | CC | 0.05  | 0.949 | 0.525 | 0.426 | 0.216 | 45.6   |
| 50 | MGM-PCMax | 100 | CC | 0.08  | 0.929 | 0.529 | 0.4   | 0.212 | 46.65  |
| 50 | MGM-PCMax | 300 | CC | 1e-04 | 0.979 | 0.612 | 0.479 | 0.275 | 39.45  |
| 50 | MGM-PCMax | 300 | CC | 0.001 | 0.985 | 0.636 | 0.497 | 0.296 | 38.1   |
| 50 | MGM-PCMax | 300 | CC | 0.01  | 0.969 | 0.654 | 0.49  | 0.307 | 38.15  |
| 50 | MGM-PCMax | 300 | CC | 0.03  | 0.975 | 0.659 | 0.488 | 0.304 | 37.85  |
| 50 | MGM-PCMax | 300 | CC | 0.05  | 0.969 | 0.66  | 0.489 | 0.308 | 37.85  |
| 50 | MGM-PCMax | 300 | CC | 0.08  | 0.964 | 0.664 | 0.482 | 0.308 | 38.05  |
| 50 | MGM-PCMax | 500 | CC | 1e-04 | 0.962 | 0.586 | 0.465 | 0.265 | 47.4   |
| 50 | MGM-PCMax | 500 | CC | 0.001 | 0.962 | 0.588 | 0.468 | 0.267 | 47.25  |
| 50 | MGM-PCMax | 500 | CC | 0.01  | 0.963 | 0.595 | 0.471 | 0.271 | 46.9   |
| 50 | MGM-PCMax | 500 | CC | 0.03  | 0.962 | 0.6   | 0.492 | 0.282 | 46.2   |
| 50 | MGM-PCMax | 500 | CC | 0.05  | 0.959 | 0.6   | 0.486 | 0.281 | 46.4   |
| 50 | MGM-PCMax | 500 | CC | 0.08  | 0.954 | 0.603 | 0.486 | 0.283 | 46.45  |
| 50 | Copula-PC | 100 | CD | 1e-04 | 0.973 | 0.075 | 0.5   | 0.001 | 114.8  |
| 50 | Copula-PC | 100 | CD | 0.001 | 0.964 | 0.103 | 0.5   | 0.003 | 113.2  |
| 50 | Copula-PC | 100 | CD | 0.01  | 0.887 | 0.158 | 0.562 | 0.007 | 111.6  |
| 50 | Copula-PC | 100 | CD | 0.03  | 0.795 | 0.188 | 0.74  | 0.017 | 112.5  |
| 50 | Copula-PC | 100 | CD | 0.05  | 0.735 | 0.21  | 0.7   | 0.026 | 114.15 |
| 50 | Copula-PC | 100 | CD | 0.08  | 0.688 | 0.24  | 0.607 | 0.03  | 116.75 |
| 50 | Copula-PC | 300 | CD | 1e-04 | 0.982 | 0.245 | 0.952 | 0.021 | 103.85 |
| 50 | Copula-PC | 300 | CD | 0.001 | 0.951 | 0.294 | 0.851 | 0.039 | 101.35 |
| 50 | Copula-PC | 300 | CD | 0.01  | 0.889 | 0.353 | 0.819 | 0.081 | 98.8   |
| 50 | Copula-PC | 300 | CD | 0.03  | 0.838 | 0.398 | 0.768 | 0.112 | 98.7   |
| 50 | Copula-PC | 300 | CD | 0.05  | 0.785 | 0.417 | 0.722 | 0.128 | 101.55 |

|    |               |     |    |       |       |       |       |       |        |
|----|---------------|-----|----|-------|-------|-------|-------|-------|--------|
| 50 | Copula-PC     | 300 | CD | 0.08  | 0.737 | 0.435 | 0.695 | 0.153 | 104.35 |
| 50 | Copula-PC     | 500 | CD | 1e-04 | 0.96  | 0.304 | 0.87  | 0.068 | 106    |
| 50 | Copula-PC     | 500 | CD | 0.001 | 0.935 | 0.353 | 0.882 | 0.106 | 101.9  |
| 50 | Copula-PC     | 500 | CD | 0.01  | 0.881 | 0.401 | 0.779 | 0.145 | 101.15 |
| 50 | Copula-PC     | 500 | CD | 0.03  | 0.824 | 0.432 | 0.754 | 0.184 | 101.9  |
| 50 | Copula-PC     | 500 | CD | 0.05  | 0.786 | 0.451 | 0.727 | 0.203 | 103.2  |
| 50 | Copula-PC     | 500 | CD | 0.08  | 0.748 | 0.469 | 0.718 | 0.228 | 105.35 |
| 50 | MGM-CPCStable | 100 | CD | 1e-04 | 0.986 | 0.201 | 1     | 0.003 | 108.1  |
| 50 | MGM-CPCStable | 100 | CD | 0.001 | 0.973 | 0.232 | 0.375 | 0.002 | 107.05 |
| 50 | MGM-CPCStable | 100 | CD | 0.01  | 0.958 | 0.264 | 0.875 | 0.01  | 105.6  |
| 50 | MGM-CPCStable | 100 | CD | 0.03  | 0.933 | 0.273 | 0.775 | 0.014 | 105.5  |
| 50 | MGM-CPCStable | 100 | CD | 0.05  | 0.93  | 0.28  | 0.717 | 0.017 | 105.25 |
| 50 | MGM-CPCStable | 100 | CD | 0.08  | 0.923 | 0.285 | 0.569 | 0.018 | 105.45 |
| 50 | MGM-CPCStable | 300 | CD | 1e-04 | 0.988 | 0.423 | 0.78  | 0.02  | 94.1   |
| 50 | MGM-CPCStable | 300 | CD | 0.001 | 0.983 | 0.44  | 0.858 | 0.037 | 92.65  |
| 50 | MGM-CPCStable | 300 | CD | 0.01  | 0.979 | 0.46  | 0.898 | 0.066 | 90.3   |
| 50 | MGM-CPCStable | 300 | CD | 0.03  | 0.972 | 0.472 | 0.948 | 0.085 | 88.95  |
| 50 | MGM-CPCStable | 300 | CD | 0.05  | 0.967 | 0.472 | 0.935 | 0.094 | 88.75  |
| 50 | MGM-CPCStable | 300 | CD | 0.08  | 0.956 | 0.475 | 0.877 | 0.111 | 88.45  |
| 50 | MGM-CPCStable | 500 | CD | 1e-04 | 0.986 | 0.425 | 0.882 | 0.051 | 99.3   |
| 50 | MGM-CPCStable | 500 | CD | 0.001 | 0.985 | 0.432 | 0.861 | 0.067 | 98.2   |
| 50 | MGM-CPCStable | 500 | CD | 0.01  | 0.981 | 0.445 | 0.824 | 0.092 | 96.65  |
| 50 | MGM-CPCStable | 500 | CD | 0.03  | 0.977 | 0.447 | 0.825 | 0.104 | 96.15  |
| 50 | MGM-CPCStable | 500 | CD | 0.05  | 0.975 | 0.448 | 0.886 | 0.114 | 95.55  |
| 50 | MGM-CPCStable | 500 | CD | 0.08  | 0.973 | 0.449 | 0.966 | 0.121 | 95.1   |
| 50 | MGM-PCStable  | 100 | CD | 1e-04 | 0.986 | 0.201 | 0.304 | 0.076 | 111.35 |
| 50 | MGM-PCStable  | 100 | CD | 0.001 | 0.973 | 0.232 | 0.316 | 0.106 | 110.5  |
| 50 | MGM-PCStable  | 100 | CD | 0.01  | 0.958 | 0.264 | 0.33  | 0.14  | 109.7  |
| 50 | MGM-PCStable  | 100 | CD | 0.03  | 0.933 | 0.273 | 0.345 | 0.155 | 109.7  |
| 50 | MGM-PCStable  | 100 | CD | 0.05  | 0.93  | 0.28  | 0.344 | 0.159 | 109.6  |
| 50 | MGM-PCStable  | 100 | CD | 0.08  | 0.923 | 0.285 | 0.342 | 0.162 | 109.7  |
| 50 | MGM-PCStable  | 300 | CD | 1e-04 | 0.988 | 0.423 | 0.414 | 0.276 | 100    |
| 50 | MGM-PCStable  | 300 | CD | 0.001 | 0.983 | 0.44  | 0.417 | 0.296 | 99.25  |
| 50 | MGM-PCStable  | 300 | CD | 0.01  | 0.979 | 0.46  | 0.425 | 0.321 | 98.05  |
| 50 | MGM-PCStable  | 300 | CD | 0.03  | 0.972 | 0.472 | 0.427 | 0.334 | 97.65  |
| 50 | MGM-PCStable  | 300 | CD | 0.05  | 0.967 | 0.472 | 0.422 | 0.334 | 97.9   |
| 50 | MGM-PCStable  | 300 | CD | 0.08  | 0.956 | 0.475 | 0.417 | 0.337 | 98.4   |
| 50 | MGM-PCStable  | 500 | CD | 1e-04 | 0.986 | 0.425 | 0.423 | 0.324 | 105.4  |
| 50 | MGM-PCStable  | 500 | CD | 0.001 | 0.985 | 0.432 | 0.426 | 0.332 | 105    |
| 50 | MGM-PCStable  | 500 | CD | 0.01  | 0.981 | 0.445 | 0.428 | 0.342 | 104.65 |
| 50 | MGM-PCStable  | 500 | CD | 0.03  | 0.977 | 0.447 | 0.426 | 0.344 | 104.75 |
| 50 | MGM-PCStable  | 500 | CD | 0.05  | 0.975 | 0.448 | 0.431 | 0.346 | 104.7  |
| 50 | MGM-PCStable  | 500 | CD | 0.08  | 0.973 | 0.449 | 0.43  | 0.348 | 104.75 |
| 50 | FGES          | 100 | CD | 1     | 0.901 | 0.376 | 0.668 | 0.165 | 96.2   |
| 50 | FGES          | 100 | CD | 1.5   | 0.898 | 0.38  | 0.668 | 0.171 | 95.95  |

EVALUATION OF CAUSAL STRUCTURE LEARNING

|    |           |     |    |       |       |       |       |       |        |
|----|-----------|-----|----|-------|-------|-------|-------|-------|--------|
| 50 | FGES      | 100 | CD | 2     | 0.896 | 0.386 | 0.664 | 0.172 | 95.85  |
| 50 | FGES      | 100 | CD | 3     | 0.893 | 0.391 | 0.663 | 0.175 | 95.7   |
| 50 | FGES      | 100 | CD | 4     | 0.889 | 0.393 | 0.657 | 0.176 | 95.9   |
| 50 | FGES      | 100 | CD | 5     | 0.888 | 0.396 | 0.658 | 0.178 | 95.8   |
| 50 | FGES      | 300 | CD | 1     | 0.969 | 0.591 | 0.763 | 0.365 | 70.95  |
| 50 | FGES      | 300 | CD | 1.5   | 0.969 | 0.593 | 0.758 | 0.369 | 70.8   |
| 50 | FGES      | 300 | CD | 2     | 0.969 | 0.594 | 0.759 | 0.37  | 70.6   |
| 50 | FGES      | 300 | CD | 3     | 0.97  | 0.599 | 0.759 | 0.376 | 70.25  |
| 50 | FGES      | 300 | CD | 4     | 0.97  | 0.599 | 0.76  | 0.377 | 70.1   |
| 50 | FGES      | 300 | CD | 5     | 0.968 | 0.6   | 0.76  | 0.377 | 70.15  |
| 50 | FGES      | 500 | CD | 1     | 0.961 | 0.62  | 0.767 | 0.426 | 72.05  |
| 50 | FGES      | 500 | CD | 1.5   | 0.962 | 0.622 | 0.768 | 0.427 | 71.75  |
| 50 | FGES      | 500 | CD | 2     | 0.961 | 0.626 | 0.767 | 0.429 | 71.6   |
| 50 | FGES      | 500 | CD | 3     | 0.961 | 0.628 | 0.767 | 0.424 | 71.65  |
| 50 | FGES      | 500 | CD | 4     | 0.96  | 0.628 | 0.766 | 0.424 | 71.75  |
| 50 | FGES      | 500 | CD | 5     | 0.96  | 0.629 | 0.766 | 0.425 | 71.6   |
| 50 | MGM-PCMax | 100 | CD | 1e-04 | 0.953 | 0.204 | 0.283 | 0.052 | 111.65 |
| 50 | MGM-PCMax | 100 | CD | 0.001 | 0.953 | 0.233 | 0.333 | 0.069 | 109.95 |
| 50 | MGM-PCMax | 100 | CD | 0.01  | 0.943 | 0.265 | 0.319 | 0.077 | 109.75 |
| 50 | MGM-PCMax | 100 | CD | 0.03  | 0.931 | 0.274 | 0.328 | 0.086 | 109.45 |
| 50 | MGM-PCMax | 100 | CD | 0.05  | 0.928 | 0.28  | 0.343 | 0.093 | 108.9  |
| 50 | MGM-PCMax | 100 | CD | 0.08  | 0.923 | 0.285 | 0.352 | 0.094 | 108.7  |
| 50 | MGM-PCMax | 300 | CD | 1e-04 | 0.982 | 0.425 | 0.32  | 0.126 | 101.9  |
| 50 | MGM-PCMax | 300 | CD | 0.001 | 0.98  | 0.44  | 0.329 | 0.137 | 100.95 |
| 50 | MGM-PCMax | 300 | CD | 0.01  | 0.979 | 0.46  | 0.352 | 0.155 | 99.15  |
| 50 | MGM-PCMax | 300 | CD | 0.03  | 0.969 | 0.472 | 0.366 | 0.167 | 98.45  |
| 50 | MGM-PCMax | 300 | CD | 0.05  | 0.969 | 0.472 | 0.368 | 0.168 | 98.35  |
| 50 | MGM-PCMax | 300 | CD | 0.08  | 0.957 | 0.475 | 0.37  | 0.171 | 98.65  |
| 50 | MGM-PCMax | 500 | CD | 1e-04 | 0.986 | 0.425 | 0.41  | 0.174 | 104.5  |
| 50 | MGM-PCMax | 500 | CD | 0.001 | 0.985 | 0.432 | 0.419 | 0.181 | 103.65 |
| 50 | MGM-PCMax | 500 | CD | 0.01  | 0.981 | 0.445 | 0.422 | 0.19  | 103.2  |
| 50 | MGM-PCMax | 500 | CD | 0.03  | 0.977 | 0.447 | 0.423 | 0.192 | 103.15 |
| 50 | MGM-PCMax | 500 | CD | 0.05  | 0.974 | 0.448 | 0.428 | 0.194 | 103.4  |
| 50 | MGM-PCMax | 500 | CD | 0.08  | 0.972 | 0.449 | 0.427 | 0.194 | 103.5  |
| 50 | Copula-PC | 100 | DD | 1e-04 | 1     | 0.047 | NA    | 0     | 57.2   |
| 50 | Copula-PC | 100 | DD | 0.001 | 0.971 | 0.065 | NA    | 0     | 56.85  |
| 50 | Copula-PC | 100 | DD | 0.01  | 0.866 | 0.101 | 1     | 0.002 | 56.7   |
| 50 | Copula-PC | 100 | DD | 0.03  | 0.774 | 0.149 | 0.75  | 0.011 | 56.45  |
| 50 | Copula-PC | 100 | DD | 0.05  | 0.704 | 0.171 | 0.5   | 0.011 | 57.4   |
| 50 | Copula-PC | 100 | DD | 0.08  | 0.607 | 0.194 | 0.389 | 0.014 | 59.4   |
| 50 | Copula-PC | 300 | DD | 1e-04 | 1     | 0.127 | 1     | 0.004 | 56.65  |
| 50 | Copula-PC | 300 | DD | 0.001 | 0.906 | 0.162 | 0.75  | 0.008 | 56.6   |
| 50 | Copula-PC | 300 | DD | 0.01  | 0.758 | 0.204 | 0.726 | 0.02  | 58.15  |
| 50 | Copula-PC | 300 | DD | 0.03  | 0.687 | 0.253 | 0.674 | 0.036 | 59.2   |
| 50 | Copula-PC | 300 | DD | 0.05  | 0.64  | 0.292 | 0.59  | 0.048 | 61.4   |

|    |               |     |    |       |       |       |       |       |       |
|----|---------------|-----|----|-------|-------|-------|-------|-------|-------|
| 50 | Copula-PC     | 300 | DD | 0.08  | 0.544 | 0.317 | 0.526 | 0.06  | 66.05 |
| 50 | Copula-PC     | 500 | DD | 1e-04 | 0.908 | 0.269 | 0.719 | 0.014 | 55.35 |
| 50 | Copula-PC     | 500 | DD | 0.001 | 0.865 | 0.32  | 0.622 | 0.023 | 54.85 |
| 50 | Copula-PC     | 500 | DD | 0.01  | 0.762 | 0.413 | 0.52  | 0.052 | 56.4  |
| 50 | Copula-PC     | 500 | DD | 0.03  | 0.676 | 0.452 | 0.481 | 0.086 | 59.9  |
| 50 | Copula-PC     | 500 | DD | 0.05  | 0.627 | 0.473 | 0.495 | 0.112 | 62.65 |
| 50 | Copula-PC     | 500 | DD | 0.08  | 0.577 | 0.495 | 0.457 | 0.146 | 65.8  |
| 50 | MGM-CPCStable | 100 | DD | 1e-04 | 0.911 | 0.145 | NA    | 0     | 55.35 |
| 50 | MGM-CPCStable | 100 | DD | 0.001 | 0.907 | 0.151 | NA    | 0     | 55.3  |
| 50 | MGM-CPCStable | 100 | DD | 0.01  | 0.92  | 0.162 | 1     | 0.005 | 54.95 |
| 50 | MGM-CPCStable | 100 | DD | 0.03  | 0.835 | 0.168 | 1     | 0.005 | 55.3  |
| 50 | MGM-CPCStable | 100 | DD | 0.05  | 0.835 | 0.17  | 1     | 0.007 | 55.2  |
| 50 | MGM-CPCStable | 100 | DD | 0.08  | 0.838 | 0.173 | 0.625 | 0.005 | 55.45 |
| 50 | MGM-CPCStable | 300 | DD | 1e-04 | 0.973 | 0.131 | 1     | 0.002 | 57.05 |
| 50 | MGM-CPCStable | 300 | DD | 0.001 | 0.984 | 0.131 | 1     | 0.008 | 56.85 |
| 50 | MGM-CPCStable | 300 | DD | 0.01  | 0.91  | 0.132 | 0.8   | 0.011 | 57.45 |
| 50 | MGM-CPCStable | 300 | DD | 0.03  | 0.895 | 0.134 | 0.926 | 0.025 | 57.1  |
| 50 | MGM-CPCStable | 300 | DD | 0.05  | 0.889 | 0.134 | 0.833 | 0.023 | 57.3  |
| 50 | MGM-CPCStable | 300 | DD | 0.08  | 0.889 | 0.134 | 0.767 | 0.025 | 57.25 |
| 50 | MGM-CPCStable | 500 | DD | 1e-04 | 0.897 | 0.181 | 1     | 0.01  | 57.2  |
| 50 | MGM-CPCStable | 500 | DD | 0.001 | 0.835 | 0.188 | 0.917 | 0.014 | 57.35 |
| 50 | MGM-CPCStable | 500 | DD | 0.01  | 0.825 | 0.191 | 0.944 | 0.023 | 57.25 |
| 50 | MGM-CPCStable | 500 | DD | 0.03  | 0.812 | 0.191 | 0.958 | 0.031 | 57.3  |
| 50 | MGM-CPCStable | 500 | DD | 0.05  | 0.804 | 0.191 | 0.929 | 0.034 | 57.45 |
| 50 | MGM-CPCStable | 500 | DD | 0.08  | 0.798 | 0.191 | 0.929 | 0.034 | 57.7  |
| 50 | MGM-PCStable  | 100 | DD | 1e-04 | 0.911 | 0.145 | 0.334 | 0.041 | 56.05 |
| 50 | MGM-PCStable  | 100 | DD | 0.001 | 0.907 | 0.151 | 0.301 | 0.052 | 56    |
| 50 | MGM-PCStable  | 100 | DD | 0.01  | 0.92  | 0.162 | 0.331 | 0.067 | 55.95 |
| 50 | MGM-PCStable  | 100 | DD | 0.03  | 0.835 | 0.168 | 0.32  | 0.073 | 56.35 |
| 50 | MGM-PCStable  | 100 | DD | 0.05  | 0.835 | 0.17  | 0.326 | 0.078 | 56.25 |
| 50 | MGM-PCStable  | 100 | DD | 0.08  | 0.838 | 0.173 | 0.328 | 0.08  | 56.4  |
| 50 | MGM-PCStable  | 300 | DD | 1e-04 | 0.973 | 0.131 | 0.309 | 0.067 | 57.85 |
| 50 | MGM-PCStable  | 300 | DD | 0.001 | 0.984 | 0.131 | 0.303 | 0.065 | 57.85 |
| 50 | MGM-PCStable  | 300 | DD | 0.01  | 0.91  | 0.132 | 0.277 | 0.071 | 58.45 |
| 50 | MGM-PCStable  | 300 | DD | 0.03  | 0.895 | 0.134 | 0.277 | 0.072 | 58.5  |
| 50 | MGM-PCStable  | 300 | DD | 0.05  | 0.889 | 0.134 | 0.271 | 0.072 | 58.6  |
| 50 | MGM-PCStable  | 300 | DD | 0.08  | 0.889 | 0.134 | 0.27  | 0.072 | 58.65 |
| 50 | MGM-PCStable  | 500 | DD | 1e-04 | 0.897 | 0.181 | 0.353 | 0.115 | 58.4  |
| 50 | MGM-PCStable  | 500 | DD | 0.001 | 0.835 | 0.188 | 0.335 | 0.122 | 58.6  |
| 50 | MGM-PCStable  | 500 | DD | 0.01  | 0.825 | 0.191 | 0.334 | 0.125 | 58.75 |
| 50 | MGM-PCStable  | 500 | DD | 0.03  | 0.812 | 0.191 | 0.327 | 0.125 | 59.1  |
| 50 | MGM-PCStable  | 500 | DD | 0.05  | 0.804 | 0.191 | 0.324 | 0.125 | 59.4  |
| 50 | MGM-PCStable  | 500 | DD | 0.08  | 0.798 | 0.191 | 0.322 | 0.125 | 59.6  |
| 50 | FGES          | 100 | DD | 1     | 0.994 | 0.212 | 0.648 | 0.056 | 52.15 |
| 50 | FGES          | 100 | DD | 1.5   | 0.991 | 0.215 | 0.639 | 0.057 | 52.25 |



EVALUATION OF CAUSAL STRUCTURE LEARNING

|     |           |     |     |       |       |       |       |       |        |
|-----|-----------|-----|-----|-------|-------|-------|-------|-------|--------|
| 50  | FGES      | 100 | DD  | 2     | 0.991 | 0.215 | 0.639 | 0.057 | 52.25  |
| 50  | FGES      | 100 | DD  | 3     | 0.991 | 0.215 | 0.649 | 0.06  | 52.2   |
| 50  | FGES      | 100 | DD  | 4     | 0.991 | 0.215 | 0.649 | 0.06  | 52.2   |
| 50  | FGES      | 100 | DD  | 5     | 0.991 | 0.215 | 0.649 | 0.06  | 52.2   |
| 50  | FGES      | 300 | DD  | 1     | 1     | 0.292 | 0.511 | 0.1   | 51.95  |
| 50  | FGES      | 300 | DD  | 1.5   | 1     | 0.294 | 0.523 | 0.106 | 51.8   |
| 50  | FGES      | 300 | DD  | 2     | 1     | 0.294 | 0.523 | 0.106 | 51.8   |
| 50  | FGES      | 300 | DD  | 3     | 1     | 0.295 | 0.53  | 0.104 | 51.75  |
| 50  | FGES      | 300 | DD  | 4     | 1     | 0.295 | 0.53  | 0.104 | 51.75  |
| 50  | FGES      | 300 | DD  | 5     | 1     | 0.295 | 0.53  | 0.104 | 51.75  |
| 50  | FGES      | 500 | DD  | 1     | 1     | 0.374 | 0.735 | 0.186 | 47.55  |
| 50  | FGES      | 500 | DD  | 1.5   | 1     | 0.374 | 0.735 | 0.186 | 47.55  |
| 50  | FGES      | 500 | DD  | 2     | 1     | 0.374 | 0.735 | 0.186 | 47.55  |
| 50  | FGES      | 500 | DD  | 3     | 1     | 0.374 | 0.743 | 0.182 | 47.6   |
| 50  | FGES      | 500 | DD  | 4     | 1     | 0.374 | 0.743 | 0.182 | 47.6   |
| 50  | FGES      | 500 | DD  | 5     | 1     | 0.374 | 0.743 | 0.182 | 47.6   |
| 50  | MGM-PCMax | 100 | DD  | 1e-04 | 0.842 | 0.148 | 0.275 | 0.021 | 56.5   |
| 50  | MGM-PCMax | 100 | DD  | 0.001 | 0.881 | 0.153 | 0.222 | 0.02  | 56.7   |
| 50  | MGM-PCMax | 100 | DD  | 0.01  | 0.894 | 0.164 | 0.281 | 0.036 | 56.35  |
| 50  | MGM-PCMax | 100 | DD  | 0.03  | 0.835 | 0.17  | 0.275 | 0.036 | 56.75  |
| 50  | MGM-PCMax | 100 | DD  | 0.05  | 0.835 | 0.174 | 0.279 | 0.039 | 56.65  |
| 50  | MGM-PCMax | 100 | DD  | 0.08  | 0.838 | 0.173 | 0.283 | 0.041 | 56.75  |
| 50  | MGM-PCMax | 300 | DD  | 1e-04 | 0.948 | 0.131 | 0.245 | 0.032 | 58.1   |
| 50  | MGM-PCMax | 300 | DD  | 0.001 | 0.967 | 0.131 | 0.244 | 0.032 | 58.15  |
| 50  | MGM-PCMax | 300 | DD  | 0.01  | 0.91  | 0.132 | 0.218 | 0.034 | 58.7   |
| 50  | MGM-PCMax | 300 | DD  | 0.03  | 0.895 | 0.134 | 0.212 | 0.034 | 58.8   |
| 50  | MGM-PCMax | 300 | DD  | 0.05  | 0.889 | 0.134 | 0.22  | 0.036 | 58.8   |
| 50  | MGM-PCMax | 300 | DD  | 0.08  | 0.889 | 0.134 | 0.215 | 0.034 | 58.9   |
| 50  | MGM-PCMax | 500 | DD  | 1e-04 | 0.897 | 0.181 | 0.185 | 0.032 | 59.55  |
| 50  | MGM-PCMax | 500 | DD  | 0.001 | 0.835 | 0.188 | 0.179 | 0.036 | 59.7   |
| 50  | MGM-PCMax | 500 | DD  | 0.01  | 0.825 | 0.191 | 0.177 | 0.038 | 59.9   |
| 50  | MGM-PCMax | 500 | DD  | 0.03  | 0.812 | 0.191 | 0.18  | 0.04  | 60.15  |
| 50  | MGM-PCMax | 500 | DD  | 0.05  | 0.804 | 0.191 | 0.176 | 0.04  | 60.45  |
| 50  | MGM-PCMax | 500 | DD  | 0.08  | 0.798 | 0.191 | 0.173 | 0.04  | 60.65  |
| 100 | Copula-PC | 300 | All | 1e-04 | 0.962 | 0.307 | 0.942 | 0.069 | 400.2  |
| 100 | Copula-PC | 300 | All | 0.001 | 0.946 | 0.352 | 0.922 | 0.099 | 387.4  |
| 100 | Copula-PC | 300 | All | 0.01  | 0.89  | 0.416 | 0.904 | 0.145 | 376.85 |
| 100 | Copula-PC | 300 | All | 0.03  | 0.809 | 0.455 | 0.875 | 0.174 | 387.3  |
| 100 | Copula-PC | 300 | All | 0.05  | 0.755 | 0.481 | 0.846 | 0.197 | 398.95 |
| 100 | Copula-PC | 300 | All | 0.08  | 0.684 | 0.5   | 0.801 | 0.221 | 424.9  |
| 100 | Copula-PC | 500 | All | 1e-04 | 0.958 | 0.415 | 0.948 | 0.141 | 362    |
| 100 | Copula-PC | 500 | All | 0.001 | 0.929 | 0.459 | 0.924 | 0.181 | 351.3  |
| 100 | Copula-PC | 500 | All | 0.01  | 0.844 | 0.516 | 0.867 | 0.245 | 353.55 |
| 100 | Copula-PC | 500 | All | 0.03  | 0.756 | 0.547 | 0.808 | 0.287 | 376.55 |
| 100 | Copula-PC | 500 | All | 0.05  | 0.7   | 0.567 | 0.777 | 0.306 | 399.3  |

|     |               |     |     |       |       |       |       |       |        |
|-----|---------------|-----|-----|-------|-------|-------|-------|-------|--------|
| 100 | Copula-PC     | 500 | All | 0.08  | 0.643 | 0.584 | 0.727 | 0.333 | 430.3  |
| 100 | MGM-CPCStable | 100 | All | 1e-04 | 0.992 | 0.263 | 0.979 | 0.009 | 413.2  |
| 100 | MGM-CPCStable | 100 | All | 0.001 | 0.981 | 0.303 | 0.963 | 0.018 | 403.55 |
| 100 | MGM-CPCStable | 100 | All | 0.01  | 0.972 | 0.346 | 0.945 | 0.033 | 392.55 |
| 100 | MGM-CPCStable | 100 | All | 0.03  | 0.954 | 0.37  | 0.891 | 0.045 | 388.7  |
| 100 | MGM-CPCStable | 100 | All | 0.05  | 0.948 | 0.381 | 0.885 | 0.056 | 385.55 |
| 100 | MGM-CPCStable | 100 | All | 0.08  | 0.939 | 0.389 | 0.842 | 0.066 | 383.9  |
| 100 | MGM-CPCStable | 300 | All | 1e-04 | 0.982 | 0.467 | 0.964 | 0.068 | 364    |
| 100 | MGM-CPCStable | 300 | All | 0.001 | 0.98  | 0.5   | 0.956 | 0.099 | 351.25 |
| 100 | MGM-CPCStable | 300 | All | 0.01  | 0.971 | 0.524 | 0.948 | 0.146 | 338.3  |
| 100 | MGM-CPCStable | 300 | All | 0.03  | 0.965 | 0.537 | 0.931 | 0.175 | 331.4  |
| 100 | MGM-CPCStable | 300 | All | 0.05  | 0.961 | 0.542 | 0.922 | 0.192 | 328.15 |
| 100 | MGM-CPCStable | 300 | All | 0.08  | 0.955 | 0.546 | 0.935 | 0.207 | 325.6  |
| 100 | MGM-CPCStable | 500 | All | 1e-04 | 0.988 | 0.539 | 0.965 | 0.133 | 330.6  |
| 100 | MGM-CPCStable | 500 | All | 0.001 | 0.987 | 0.561 | 0.959 | 0.164 | 319.15 |
| 100 | MGM-CPCStable | 500 | All | 0.01  | 0.979 | 0.577 | 0.963 | 0.215 | 306.15 |
| 100 | MGM-CPCStable | 500 | All | 0.03  | 0.972 | 0.584 | 0.95  | 0.243 | 300.45 |
| 100 | MGM-CPCStable | 500 | All | 0.05  | 0.966 | 0.586 | 0.948 | 0.26  | 297.75 |
| 100 | MGM-CPCStable | 500 | All | 0.08  | 0.963 | 0.588 | 0.944 | 0.276 | 294.7  |
| 100 | MGM-PCStable  | 100 | All | 1e-04 | 0.992 | 0.263 | 0.406 | 0.132 | 428.5  |
| 100 | MGM-PCStable  | 100 | All | 0.001 | 0.981 | 0.303 | 0.417 | 0.178 | 421.55 |
| 100 | MGM-PCStable  | 100 | All | 0.01  | 0.972 | 0.346 | 0.43  | 0.233 | 413.65 |
| 100 | MGM-PCStable  | 100 | All | 0.03  | 0.954 | 0.37  | 0.43  | 0.266 | 410.8  |
| 100 | MGM-PCStable  | 100 | All | 0.05  | 0.948 | 0.381 | 0.431 | 0.28  | 409.15 |
| 100 | MGM-PCStable  | 100 | All | 0.08  | 0.939 | 0.389 | 0.429 | 0.29  | 408.65 |
| 100 | MGM-PCStable  | 300 | All | 1e-04 | 0.982 | 0.467 | 0.462 | 0.374 | 388.6  |
| 100 | MGM-PCStable  | 300 | All | 0.001 | 0.98  | 0.5   | 0.468 | 0.418 | 380.4  |
| 100 | MGM-PCStable  | 300 | All | 0.01  | 0.971 | 0.524 | 0.467 | 0.447 | 376.6  |
| 100 | MGM-PCStable  | 300 | All | 0.03  | 0.965 | 0.537 | 0.466 | 0.463 | 374.9  |
| 100 | MGM-PCStable  | 300 | All | 0.05  | 0.961 | 0.542 | 0.465 | 0.469 | 374.55 |
| 100 | MGM-PCStable  | 300 | All | 0.08  | 0.955 | 0.546 | 0.463 | 0.474 | 375.15 |
| 100 | MGM-PCStable  | 500 | All | 1e-04 | 0.988 | 0.539 | 0.476 | 0.471 | 367.6  |
| 100 | MGM-PCStable  | 500 | All | 0.001 | 0.987 | 0.561 | 0.478 | 0.497 | 361.95 |
| 100 | MGM-PCStable  | 500 | All | 0.01  | 0.979 | 0.577 | 0.475 | 0.515 | 360.25 |
| 100 | MGM-PCStable  | 500 | All | 0.03  | 0.972 | 0.584 | 0.474 | 0.525 | 359.75 |
| 100 | MGM-PCStable  | 500 | All | 0.05  | 0.966 | 0.586 | 0.472 | 0.528 | 360.75 |
| 100 | MGM-PCStable  | 500 | All | 0.08  | 0.963 | 0.588 | 0.47  | 0.529 | 361.25 |
| 100 | FGES          | 100 | All | 1     | 0.89  | 0.423 | 0.68  | 0.26  | 358.8  |
| 100 | FGES          | 100 | All | 1.5   | 0.887 | 0.425 | 0.677 | 0.263 | 358.9  |
| 100 | FGES          | 100 | All | 2     | 0.882 | 0.429 | 0.668 | 0.271 | 358.85 |
| 100 | FGES          | 100 | All | 3     | 0.878 | 0.432 | 0.661 | 0.278 | 358.75 |
| 100 | FGES          | 100 | All | 4     | 0.871 | 0.433 | 0.655 | 0.282 | 359.9  |
| 100 | FGES          | 100 | All | 5     | 0.867 | 0.434 | 0.652 | 0.28  | 361.4  |
| 100 | FGES          | 300 | All | 1     | 0.918 | 0.576 | 0.722 | 0.418 | 301.6  |
| 100 | FGES          | 300 | All | 1.5   | 0.913 | 0.578 | 0.716 | 0.419 | 303    |

EVALUATION OF CAUSAL STRUCTURE LEARNING

|     |               |     |     |       |       |       |       |       |        |
|-----|---------------|-----|-----|-------|-------|-------|-------|-------|--------|
| 100 | FGES          | 300 | All | 2     | 0.912 | 0.578 | 0.715 | 0.42  | 303.25 |
| 100 | FGES          | 300 | All | 3     | 0.91  | 0.579 | 0.713 | 0.422 | 303.45 |
| 100 | FGES          | 300 | All | 4     | 0.908 | 0.58  | 0.712 | 0.422 | 303.9  |
| 100 | FGES          | 300 | All | 5     | 0.905 | 0.58  | 0.708 | 0.423 | 304.7  |
| 100 | FGES          | 500 | All | 1     | 0.938 | 0.641 | 0.756 | 0.473 | 265.75 |
| 100 | FGES          | 500 | All | 1.5   | 0.936 | 0.642 | 0.754 | 0.475 | 266.2  |
| 100 | FGES          | 500 | All | 2     | 0.934 | 0.642 | 0.752 | 0.475 | 266.7  |
| 100 | FGES          | 500 | All | 3     | 0.931 | 0.643 | 0.748 | 0.476 | 267.6  |
| 100 | FGES          | 500 | All | 4     | 0.928 | 0.644 | 0.745 | 0.476 | 268.35 |
| 100 | FGES          | 500 | All | 5     | 0.927 | 0.645 | 0.745 | 0.476 | 268.6  |
| 100 | MGM-PCMax     | 100 | All | 1e-04 | 0.981 | 0.268 | 0.341 | 0.07  | 429.3  |
| 100 | MGM-PCMax     | 100 | All | 0.001 | 0.971 | 0.306 | 0.358 | 0.091 | 423.1  |
| 100 | MGM-PCMax     | 100 | All | 0.01  | 0.966 | 0.349 | 0.393 | 0.122 | 412.8  |
| 100 | MGM-PCMax     | 100 | All | 0.03  | 0.947 | 0.371 | 0.403 | 0.14  | 409.25 |
| 100 | MGM-PCMax     | 100 | All | 0.05  | 0.941 | 0.382 | 0.417 | 0.152 | 405.9  |
| 100 | MGM-PCMax     | 100 | All | 0.08  | 0.933 | 0.39  | 0.42  | 0.159 | 404.9  |
| 100 | MGM-PCMax     | 300 | All | 1e-04 | 0.977 | 0.47  | 0.413 | 0.182 | 393.05 |
| 100 | MGM-PCMax     | 300 | All | 0.001 | 0.975 | 0.501 | 0.437 | 0.208 | 382.95 |
| 100 | MGM-PCMax     | 300 | All | 0.01  | 0.966 | 0.525 | 0.447 | 0.225 | 377.05 |
| 100 | MGM-PCMax     | 300 | All | 0.03  | 0.961 | 0.538 | 0.45  | 0.236 | 374.5  |
| 100 | MGM-PCMax     | 300 | All | 0.05  | 0.958 | 0.543 | 0.455 | 0.242 | 372.6  |
| 100 | MGM-PCMax     | 300 | All | 0.08  | 0.953 | 0.547 | 0.457 | 0.245 | 372.15 |
| 100 | MGM-PCMax     | 500 | All | 1e-04 | 0.984 | 0.54  | 0.456 | 0.239 | 368.75 |
| 100 | MGM-PCMax     | 500 | All | 0.001 | 0.984 | 0.562 | 0.476 | 0.261 | 358.8  |
| 100 | MGM-PCMax     | 500 | All | 0.01  | 0.978 | 0.578 | 0.485 | 0.277 | 353.95 |
| 100 | MGM-PCMax     | 500 | All | 0.03  | 0.971 | 0.585 | 0.485 | 0.282 | 353.4  |
| 100 | MGM-PCMax     | 500 | All | 0.05  | 0.965 | 0.586 | 0.482 | 0.284 | 354.65 |
| 100 | MGM-PCMax     | 500 | All | 0.08  | 0.962 | 0.588 | 0.481 | 0.285 | 355.05 |
| 100 | Copula-PC     | 300 | CC  | 1e-04 | 0.97  | 0.669 | 0.96  | 0.232 | 74.95  |
| 100 | Copula-PC     | 300 | CC  | 0.001 | 0.968 | 0.711 | 0.947 | 0.317 | 68.3   |
| 100 | Copula-PC     | 300 | CC  | 0.01  | 0.955 | 0.759 | 0.94  | 0.409 | 61.35  |
| 100 | Copula-PC     | 300 | CC  | 0.03  | 0.929 | 0.784 | 0.931 | 0.466 | 58.95  |
| 100 | Copula-PC     | 300 | CC  | 0.05  | 0.902 | 0.795 | 0.923 | 0.506 | 58.65  |
| 100 | Copula-PC     | 300 | CC  | 0.08  | 0.878 | 0.805 | 0.909 | 0.54  | 59.65  |
| 100 | Copula-PC     | 500 | CC  | 1e-04 | 0.974 | 0.767 | 0.971 | 0.414 | 52.45  |
| 100 | Copula-PC     | 500 | CC  | 0.001 | 0.965 | 0.805 | 0.968 | 0.5   | 46.3   |
| 100 | Copula-PC     | 500 | CC  | 0.01  | 0.948 | 0.835 | 0.956 | 0.61  | 40.05  |
| 100 | Copula-PC     | 500 | CC  | 0.03  | 0.921 | 0.852 | 0.936 | 0.647 | 40.3   |
| 100 | Copula-PC     | 500 | CC  | 0.05  | 0.907 | 0.863 | 0.924 | 0.662 | 40.4   |
| 100 | Copula-PC     | 500 | CC  | 0.08  | 0.882 | 0.87  | 0.909 | 0.686 | 41.95  |
| 100 | MGM-CPCStable | 100 | CC  | 1e-04 | 0.996 | 0.384 | 1     | 0.035 | 95.65  |
| 100 | MGM-CPCStable | 100 | CC  | 0.001 | 0.985 | 0.437 | 0.969 | 0.061 | 91.65  |
| 100 | MGM-CPCStable | 100 | CC  | 0.01  | 0.981 | 0.503 | 0.967 | 0.101 | 85.95  |
| 100 | MGM-CPCStable | 100 | CC  | 0.03  | 0.955 | 0.537 | 0.924 | 0.125 | 84.9   |
| 100 | MGM-CPCStable | 100 | CC  | 0.05  | 0.953 | 0.553 | 0.923 | 0.147 | 83.35  |

|     |               |     |    |       |       |       |       |       |        |
|-----|---------------|-----|----|-------|-------|-------|-------|-------|--------|
| 100 | MGM-CPCStable | 100 | CC | 0.08  | 0.946 | 0.563 | 0.864 | 0.165 | 82.8   |
| 100 | MGM-CPCStable | 300 | CC | 1e-04 | 0.977 | 0.628 | 0.984 | 0.2   | 78.2   |
| 100 | MGM-CPCStable | 300 | CC | 0.001 | 0.976 | 0.677 | 0.97  | 0.268 | 72.25  |
| 100 | MGM-CPCStable | 300 | CC | 0.01  | 0.969 | 0.715 | 0.958 | 0.352 | 66.25  |
| 100 | MGM-CPCStable | 300 | CC | 0.03  | 0.968 | 0.725 | 0.951 | 0.383 | 64.15  |
| 100 | MGM-CPCStable | 300 | CC | 0.05  | 0.968 | 0.735 | 0.944 | 0.404 | 62.85  |
| 100 | MGM-CPCStable | 300 | CC | 0.08  | 0.963 | 0.739 | 0.943 | 0.42  | 62.5   |
| 100 | MGM-CPCStable | 500 | CC | 1e-04 | 0.985 | 0.716 | 0.964 | 0.357 | 58.5   |
| 100 | MGM-CPCStable | 500 | CC | 0.001 | 0.987 | 0.742 | 0.958 | 0.397 | 54.95  |
| 100 | MGM-CPCStable | 500 | CC | 0.01  | 0.977 | 0.758 | 0.963 | 0.45  | 52.1   |
| 100 | MGM-CPCStable | 500 | CC | 0.03  | 0.971 | 0.769 | 0.947 | 0.474 | 50.85  |
| 100 | MGM-CPCStable | 500 | CC | 0.05  | 0.968 | 0.771 | 0.947 | 0.48  | 50.55  |
| 100 | MGM-CPCStable | 500 | CC | 0.08  | 0.965 | 0.773 | 0.942 | 0.491 | 50.15  |
| 100 | MGM-PCStable  | 100 | CC | 1e-04 | 0.996 | 0.384 | 0.433 | 0.218 | 101.05 |
| 100 | MGM-PCStable  | 100 | CC | 0.001 | 0.985 | 0.437 | 0.445 | 0.288 | 98.35  |
| 100 | MGM-PCStable  | 100 | CC | 0.01  | 0.981 | 0.503 | 0.455 | 0.373 | 94.65  |
| 100 | MGM-PCStable  | 100 | CC | 0.03  | 0.955 | 0.537 | 0.452 | 0.425 | 94.15  |
| 100 | MGM-PCStable  | 100 | CC | 0.05  | 0.953 | 0.553 | 0.45  | 0.443 | 93.55  |
| 100 | MGM-PCStable  | 100 | CC | 0.08  | 0.946 | 0.563 | 0.447 | 0.456 | 93.55  |
| 100 | MGM-PCStable  | 300 | CC | 1e-04 | 0.977 | 0.628 | 0.483 | 0.545 | 89.8   |
| 100 | MGM-PCStable  | 300 | CC | 0.001 | 0.976 | 0.677 | 0.488 | 0.61  | 86.65  |
| 100 | MGM-PCStable  | 300 | CC | 0.01  | 0.969 | 0.715 | 0.484 | 0.652 | 85.2   |
| 100 | MGM-PCStable  | 300 | CC | 0.03  | 0.968 | 0.725 | 0.483 | 0.664 | 84.7   |
| 100 | MGM-PCStable  | 300 | CC | 0.05  | 0.968 | 0.735 | 0.484 | 0.675 | 84.2   |
| 100 | MGM-PCStable  | 300 | CC | 0.08  | 0.963 | 0.739 | 0.482 | 0.681 | 84.5   |
| 100 | MGM-PCStable  | 500 | CC | 1e-04 | 0.985 | 0.716 | 0.48  | 0.634 | 79.45  |
| 100 | MGM-PCStable  | 500 | CC | 0.001 | 0.987 | 0.742 | 0.485 | 0.669 | 77.3   |
| 100 | MGM-PCStable  | 500 | CC | 0.01  | 0.977 | 0.758 | 0.482 | 0.692 | 77.05  |
| 100 | MGM-PCStable  | 500 | CC | 0.03  | 0.971 | 0.769 | 0.481 | 0.705 | 76.65  |
| 100 | MGM-PCStable  | 500 | CC | 0.05  | 0.968 | 0.771 | 0.479 | 0.707 | 76.85  |
| 100 | MGM-PCStable  | 500 | CC | 0.08  | 0.965 | 0.773 | 0.477 | 0.709 | 77.1   |
| 100 | FGES          | 100 | CC | 1     | 0.882 | 0.678 | 0.754 | 0.52  | 65.55  |
| 100 | FGES          | 100 | CC | 1.5   | 0.877 | 0.681 | 0.749 | 0.523 | 65.7   |
| 100 | FGES          | 100 | CC | 2     | 0.873 | 0.688 | 0.744 | 0.539 | 65.3   |
| 100 | FGES          | 100 | CC | 3     | 0.87  | 0.693 | 0.738 | 0.548 | 65.3   |
| 100 | FGES          | 100 | CC | 4     | 0.859 | 0.693 | 0.727 | 0.552 | 66.25  |
| 100 | FGES          | 100 | CC | 5     | 0.854 | 0.696 | 0.714 | 0.547 | 67.15  |
| 100 | FGES          | 300 | CC | 1     | 0.863 | 0.848 | 0.754 | 0.705 | 56.55  |
| 100 | FGES          | 300 | CC | 1.5   | 0.855 | 0.848 | 0.746 | 0.705 | 57.75  |
| 100 | FGES          | 300 | CC | 2     | 0.853 | 0.849 | 0.745 | 0.706 | 57.95  |
| 100 | FGES          | 300 | CC | 3     | 0.85  | 0.848 | 0.741 | 0.706 | 58.4   |
| 100 | FGES          | 300 | CC | 4     | 0.846 | 0.849 | 0.739 | 0.707 | 58.7   |
| 100 | FGES          | 300 | CC | 5     | 0.841 | 0.848 | 0.733 | 0.708 | 59.3   |
| 100 | FGES          | 500 | CC | 1     | 0.884 | 0.928 | 0.791 | 0.805 | 38     |
| 100 | FGES          | 500 | CC | 1.5   | 0.88  | 0.928 | 0.788 | 0.805 | 38.45  |

EVALUATION OF CAUSAL STRUCTURE LEARNING

|     |               |     |    |       |       |       |       |       |        |
|-----|---------------|-----|----|-------|-------|-------|-------|-------|--------|
| 100 | FGES          | 500 | CC | 2     | 0.877 | 0.928 | 0.785 | 0.805 | 38.85  |
| 100 | FGES          | 500 | CC | 3     | 0.871 | 0.929 | 0.779 | 0.806 | 39.75  |
| 100 | FGES          | 500 | CC | 4     | 0.864 | 0.93  | 0.773 | 0.807 | 40.65  |
| 100 | FGES          | 500 | CC | 5     | 0.861 | 0.931 | 0.769 | 0.808 | 40.9   |
| 100 | MGM-PCMax     | 100 | CC | 1e-04 | 0.98  | 0.389 | 0.409 | 0.126 | 100.9  |
| 100 | MGM-PCMax     | 100 | CC | 0.001 | 0.974 | 0.44  | 0.389 | 0.146 | 99.55  |
| 100 | MGM-PCMax     | 100 | CC | 0.01  | 0.976 | 0.509 | 0.431 | 0.2   | 94.35  |
| 100 | MGM-PCMax     | 100 | CC | 0.03  | 0.954 | 0.539 | 0.461 | 0.235 | 91.9   |
| 100 | MGM-PCMax     | 100 | CC | 0.05  | 0.952 | 0.555 | 0.461 | 0.247 | 91.25  |
| 100 | MGM-PCMax     | 100 | CC | 0.08  | 0.943 | 0.565 | 0.47  | 0.259 | 90.6   |
| 100 | MGM-PCMax     | 300 | CC | 1e-04 | 0.976 | 0.636 | 0.45  | 0.274 | 91.15  |
| 100 | MGM-PCMax     | 300 | CC | 0.001 | 0.973 | 0.681 | 0.48  | 0.314 | 86.75  |
| 100 | MGM-PCMax     | 300 | CC | 0.01  | 0.968 | 0.716 | 0.493 | 0.341 | 84.05  |
| 100 | MGM-PCMax     | 300 | CC | 0.03  | 0.966 | 0.728 | 0.49  | 0.351 | 83.65  |
| 100 | MGM-PCMax     | 300 | CC | 0.05  | 0.964 | 0.736 | 0.496 | 0.362 | 82.85  |
| 100 | MGM-PCMax     | 300 | CC | 0.08  | 0.96  | 0.74  | 0.506 | 0.372 | 82.1   |
| 100 | MGM-PCMax     | 500 | CC | 1e-04 | 0.98  | 0.717 | 0.453 | 0.316 | 80.1   |
| 100 | MGM-PCMax     | 500 | CC | 0.001 | 0.984 | 0.742 | 0.472 | 0.344 | 77.25  |
| 100 | MGM-PCMax     | 500 | CC | 0.01  | 0.976 | 0.759 | 0.485 | 0.367 | 75.65  |
| 100 | MGM-PCMax     | 500 | CC | 0.03  | 0.97  | 0.769 | 0.491 | 0.379 | 75.05  |
| 100 | MGM-PCMax     | 500 | CC | 0.05  | 0.966 | 0.771 | 0.496 | 0.385 | 74.7   |
| 100 | MGM-PCMax     | 500 | CC | 0.08  | 0.964 | 0.773 | 0.499 | 0.389 | 74.4   |
| 100 | Copula-PC     | 300 | CD | 1e-04 | 0.963 | 0.224 | 0.876 | 0.02  | 215.35 |
| 100 | Copula-PC     | 300 | CD | 0.001 | 0.944 | 0.272 | 0.863 | 0.037 | 209.8  |
| 100 | Copula-PC     | 300 | CD | 0.01  | 0.887 | 0.335 | 0.876 | 0.078 | 203.9  |
| 100 | Copula-PC     | 300 | CD | 0.03  | 0.8   | 0.373 | 0.815 | 0.101 | 209.45 |
| 100 | Copula-PC     | 300 | CD | 0.05  | 0.751 | 0.405 | 0.797 | 0.125 | 213    |
| 100 | Copula-PC     | 300 | CD | 0.08  | 0.68  | 0.423 | 0.746 | 0.146 | 225    |
| 100 | Copula-PC     | 500 | CD | 1e-04 | 0.966 | 0.323 | 0.912 | 0.073 | 201.65 |
| 100 | Copula-PC     | 500 | CD | 0.001 | 0.941 | 0.365 | 0.873 | 0.102 | 196.4  |
| 100 | Copula-PC     | 500 | CD | 0.01  | 0.868 | 0.428 | 0.829 | 0.161 | 193.85 |
| 100 | Copula-PC     | 500 | CD | 0.03  | 0.791 | 0.464 | 0.771 | 0.207 | 199.3  |
| 100 | Copula-PC     | 500 | CD | 0.05  | 0.733 | 0.485 | 0.748 | 0.229 | 207.85 |
| 100 | Copula-PC     | 500 | CD | 0.08  | 0.678 | 0.501 | 0.704 | 0.259 | 218.7  |
| 100 | MGM-CPCStable | 100 | CD | 1e-04 | 0.988 | 0.238 | 0.8   | 0.002 | 211.7  |
| 100 | MGM-CPCStable | 100 | CD | 0.001 | 0.975 | 0.285 | 1     | 0.005 | 206.7  |
| 100 | MGM-CPCStable | 100 | CD | 0.01  | 0.97  | 0.33  | 0.857 | 0.011 | 201.55 |
| 100 | MGM-CPCStable | 100 | CD | 0.03  | 0.959 | 0.359 | 0.774 | 0.02  | 198.75 |
| 100 | MGM-CPCStable | 100 | CD | 0.05  | 0.948 | 0.372 | 0.796 | 0.029 | 197.55 |
| 100 | MGM-CPCStable | 100 | CD | 0.08  | 0.941 | 0.381 | 0.735 | 0.039 | 196.4  |
| 100 | MGM-CPCStable | 300 | CD | 1e-04 | 0.987 | 0.458 | 0.829 | 0.027 | 187.5  |
| 100 | MGM-CPCStable | 300 | CD | 0.001 | 0.986 | 0.497 | 0.907 | 0.046 | 181.5  |
| 100 | MGM-CPCStable | 300 | CD | 0.01  | 0.981 | 0.525 | 0.936 | 0.078 | 175.3  |
| 100 | MGM-CPCStable | 300 | CD | 0.03  | 0.977 | 0.544 | 0.901 | 0.107 | 170.75 |
| 100 | MGM-CPCStable | 300 | CD | 0.05  | 0.973 | 0.551 | 0.913 | 0.124 | 168.65 |

|     |               |     |    |       |       |       |       |       |        |
|-----|---------------|-----|----|-------|-------|-------|-------|-------|--------|
| 100 | MGM-CPCStable | 300 | CD | 0.08  | 0.97  | 0.556 | 0.945 | 0.142 | 166.2  |
| 100 | MGM-CPCStable | 500 | CD | 1e-04 | 0.992 | 0.557 | 0.955 | 0.068 | 172.9  |
| 100 | MGM-CPCStable | 500 | CD | 0.001 | 0.99  | 0.587 | 0.952 | 0.096 | 166.7  |
| 100 | MGM-CPCStable | 500 | CD | 0.01  | 0.985 | 0.611 | 0.967 | 0.159 | 157.2  |
| 100 | MGM-CPCStable | 500 | CD | 0.03  | 0.981 | 0.621 | 0.947 | 0.194 | 153.1  |
| 100 | MGM-CPCStable | 500 | CD | 0.05  | 0.977 | 0.624 | 0.941 | 0.217 | 150.7  |
| 100 | MGM-CPCStable | 500 | CD | 0.08  | 0.976 | 0.627 | 0.942 | 0.239 | 148.05 |
| 100 | MGM-PCStable  | 100 | CD | 1e-04 | 0.988 | 0.238 | 0.376 | 0.11  | 219.4  |
| 100 | MGM-PCStable  | 100 | CD | 0.001 | 0.975 | 0.285 | 0.382 | 0.154 | 216.5  |
| 100 | MGM-PCStable  | 100 | CD | 0.01  | 0.97  | 0.33  | 0.403 | 0.209 | 212    |
| 100 | MGM-PCStable  | 100 | CD | 0.03  | 0.959 | 0.359 | 0.411 | 0.244 | 209.4  |
| 100 | MGM-PCStable  | 100 | CD | 0.05  | 0.948 | 0.372 | 0.411 | 0.261 | 208.6  |
| 100 | MGM-PCStable  | 100 | CD | 0.08  | 0.941 | 0.381 | 0.413 | 0.273 | 207.9  |
| 100 | MGM-PCStable  | 300 | CD | 1e-04 | 0.987 | 0.458 | 0.444 | 0.344 | 198.65 |
| 100 | MGM-PCStable  | 300 | CD | 0.001 | 0.986 | 0.497 | 0.454 | 0.396 | 193.45 |
| 100 | MGM-PCStable  | 300 | CD | 0.01  | 0.981 | 0.525 | 0.459 | 0.431 | 189.95 |
| 100 | MGM-PCStable  | 300 | CD | 0.03  | 0.977 | 0.544 | 0.461 | 0.456 | 187.75 |
| 100 | MGM-PCStable  | 300 | CD | 0.05  | 0.973 | 0.551 | 0.461 | 0.463 | 187.2  |
| 100 | MGM-PCStable  | 300 | CD | 0.08  | 0.97  | 0.556 | 0.46  | 0.47  | 187.15 |
| 100 | MGM-PCStable  | 500 | CD | 1e-04 | 0.992 | 0.557 | 0.471 | 0.481 | 185.6  |
| 100 | MGM-PCStable  | 500 | CD | 0.001 | 0.99  | 0.587 | 0.472 | 0.515 | 182.2  |
| 100 | MGM-PCStable  | 500 | CD | 0.01  | 0.985 | 0.611 | 0.472 | 0.541 | 179.8  |
| 100 | MGM-PCStable  | 500 | CD | 0.03  | 0.981 | 0.621 | 0.472 | 0.553 | 178.9  |
| 100 | MGM-PCStable  | 500 | CD | 0.05  | 0.977 | 0.624 | 0.472 | 0.557 | 178.9  |
| 100 | MGM-PCStable  | 500 | CD | 0.08  | 0.976 | 0.627 | 0.471 | 0.56  | 178.75 |
| 100 | FGES          | 100 | CD | 1     | 0.883 | 0.392 | 0.614 | 0.208 | 190.85 |
| 100 | FGES          | 100 | CD | 1.5   | 0.879 | 0.394 | 0.612 | 0.212 | 190.85 |
| 100 | FGES          | 100 | CD | 2     | 0.872 | 0.395 | 0.601 | 0.219 | 191.55 |
| 100 | FGES          | 100 | CD | 3     | 0.869 | 0.399 | 0.597 | 0.226 | 191.35 |
| 100 | FGES          | 100 | CD | 4     | 0.865 | 0.401 | 0.595 | 0.231 | 191.5  |
| 100 | FGES          | 100 | CD | 5     | 0.86  | 0.401 | 0.598 | 0.23  | 192.05 |
| 100 | FGES          | 300 | CD | 1     | 0.954 | 0.57  | 0.738 | 0.401 | 149.05 |
| 100 | FGES          | 300 | CD | 1.5   | 0.951 | 0.573 | 0.735 | 0.403 | 149.25 |
| 100 | FGES          | 300 | CD | 2     | 0.95  | 0.574 | 0.733 | 0.404 | 149.35 |
| 100 | FGES          | 300 | CD | 3     | 0.949 | 0.575 | 0.731 | 0.406 | 149.2  |
| 100 | FGES          | 300 | CD | 4     | 0.948 | 0.575 | 0.731 | 0.406 | 149.35 |
| 100 | FGES          | 300 | CD | 5     | 0.946 | 0.576 | 0.728 | 0.407 | 149.5  |
| 100 | FGES          | 500 | CD | 1     | 0.97  | 0.645 | 0.779 | 0.464 | 131.2  |
| 100 | FGES          | 500 | CD | 1.5   | 0.969 | 0.646 | 0.777 | 0.465 | 131.35 |
| 100 | FGES          | 500 | CD | 2     | 0.968 | 0.647 | 0.776 | 0.465 | 131.45 |
| 100 | FGES          | 500 | CD | 3     | 0.967 | 0.649 | 0.772 | 0.466 | 131.5  |
| 100 | FGES          | 500 | CD | 4     | 0.967 | 0.65  | 0.771 | 0.466 | 131.4  |
| 100 | FGES          | 500 | CD | 5     | 0.967 | 0.65  | 0.771 | 0.466 | 131.45 |
| 100 | MGM-PCMax     | 100 | CD | 1e-04 | 0.98  | 0.243 | 0.296 | 0.056 | 219.65 |
| 100 | MGM-PCMax     | 100 | CD | 0.001 | 0.966 | 0.287 | 0.326 | 0.078 | 216    |

EVALUATION OF CAUSAL STRUCTURE LEARNING

|     |               |     |    |       |       |       |       |       |        |
|-----|---------------|-----|----|-------|-------|-------|-------|-------|--------|
| 100 | MGM-PCMax     | 100 | CD | 0.01  | 0.963 | 0.332 | 0.367 | 0.109 | 210.95 |
| 100 | MGM-PCMax     | 100 | CD | 0.03  | 0.945 | 0.359 | 0.365 | 0.124 | 209.95 |
| 100 | MGM-PCMax     | 100 | CD | 0.05  | 0.939 | 0.373 | 0.397 | 0.142 | 206.8  |
| 100 | MGM-PCMax     | 100 | CD | 0.08  | 0.933 | 0.383 | 0.395 | 0.147 | 206.5  |
| 100 | MGM-PCMax     | 300 | CD | 1e-04 | 0.982 | 0.459 | 0.408 | 0.177 | 198.05 |
| 100 | MGM-PCMax     | 300 | CD | 0.001 | 0.981 | 0.498 | 0.432 | 0.206 | 192.35 |
| 100 | MGM-PCMax     | 300 | CD | 0.01  | 0.975 | 0.525 | 0.44  | 0.223 | 188.9  |
| 100 | MGM-PCMax     | 300 | CD | 0.03  | 0.972 | 0.545 | 0.453 | 0.239 | 185.8  |
| 100 | MGM-PCMax     | 300 | CD | 0.05  | 0.972 | 0.551 | 0.458 | 0.245 | 184.1  |
| 100 | MGM-PCMax     | 300 | CD | 0.08  | 0.968 | 0.557 | 0.457 | 0.248 | 183.95 |
| 100 | MGM-PCMax     | 500 | CD | 1e-04 | 0.988 | 0.558 | 0.477 | 0.26  | 182.15 |
| 100 | MGM-PCMax     | 500 | CD | 0.001 | 0.987 | 0.59  | 0.498 | 0.287 | 175.8  |
| 100 | MGM-PCMax     | 500 | CD | 0.01  | 0.985 | 0.612 | 0.51  | 0.307 | 171.55 |
| 100 | MGM-PCMax     | 500 | CD | 0.03  | 0.981 | 0.621 | 0.51  | 0.313 | 170.5  |
| 100 | MGM-PCMax     | 500 | CD | 0.05  | 0.977 | 0.624 | 0.505 | 0.314 | 171.15 |
| 100 | MGM-PCMax     | 500 | CD | 0.08  | 0.976 | 0.627 | 0.503 | 0.315 | 171.25 |
| 100 | Copula-PC     | 300 | DD | 1e-04 | 0.927 | 0.106 | 0.5   | 0.001 | 109.9  |
| 100 | Copula-PC     | 300 | DD | 0.001 | 0.863 | 0.148 | 0.75  | 0.002 | 109.3  |
| 100 | Copula-PC     | 300 | DD | 0.01  | 0.72  | 0.229 | 0.464 | 0.01  | 111.6  |
| 100 | Copula-PC     | 300 | DD | 0.03  | 0.596 | 0.279 | 0.569 | 0.023 | 118.9  |
| 100 | Copula-PC     | 300 | DD | 0.05  | 0.527 | 0.312 | 0.441 | 0.026 | 127.3  |
| 100 | Copula-PC     | 300 | DD | 0.08  | 0.445 | 0.342 | 0.429 | 0.046 | 140.25 |
| 100 | Copula-PC     | 500 | DD | 1e-04 | 0.903 | 0.266 | 0.812 | 0.023 | 107.9  |
| 100 | Copula-PC     | 500 | DD | 0.001 | 0.829 | 0.319 | 0.763 | 0.039 | 108.6  |
| 100 | Copula-PC     | 500 | DD | 0.01  | 0.665 | 0.39  | 0.55  | 0.069 | 119.65 |
| 100 | Copula-PC     | 500 | DD | 0.03  | 0.53  | 0.424 | 0.516 | 0.107 | 136.95 |
| 100 | Copula-PC     | 500 | DD | 0.05  | 0.465 | 0.449 | 0.477 | 0.124 | 151.05 |
| 100 | Copula-PC     | 500 | DD | 0.08  | 0.408 | 0.478 | 0.425 | 0.148 | 169.65 |
| 100 | MGM-CPCStable | 100 | DD | 1e-04 | 0.995 | 0.2   | 1     | 0.002 | 105.85 |
| 100 | MGM-CPCStable | 100 | DD | 0.001 | 0.992 | 0.211 | 0.833 | 0.004 | 105.2  |
| 100 | MGM-CPCStable | 100 | DD | 0.01  | 0.956 | 0.225 | 0.875 | 0.01  | 105.05 |
| 100 | MGM-CPCStable | 100 | DD | 0.03  | 0.934 | 0.23  | 0.925 | 0.017 | 105.05 |
| 100 | MGM-CPCStable | 100 | DD | 0.05  | 0.926 | 0.233 | 0.897 | 0.023 | 104.65 |
| 100 | MGM-CPCStable | 100 | DD | 0.08  | 0.91  | 0.236 | 0.933 | 0.026 | 104.7  |
| 100 | MGM-CPCStable | 300 | DD | 1e-04 | 0.985 | 0.315 | 1     | 0.015 | 98.3   |
| 100 | MGM-CPCStable | 300 | DD | 0.001 | 0.957 | 0.32  | 0.982 | 0.038 | 97.5   |
| 100 | MGM-CPCStable | 300 | DD | 0.01  | 0.919 | 0.322 | 0.969 | 0.076 | 96.75  |
| 100 | MGM-CPCStable | 300 | DD | 0.03  | 0.891 | 0.323 | 0.891 | 0.103 | 96.5   |
| 100 | MGM-CPCStable | 300 | DD | 0.05  | 0.875 | 0.323 | 0.805 | 0.116 | 96.65  |
| 100 | MGM-CPCStable | 300 | DD | 0.08  | 0.865 | 0.323 | 0.896 | 0.123 | 96.9   |
| 100 | MGM-CPCStable | 500 | DD | 1e-04 | 0.954 | 0.335 | 1     | 0.053 | 99.2   |
| 100 | MGM-CPCStable | 500 | DD | 0.001 | 0.952 | 0.337 | 1     | 0.083 | 97.5   |
| 100 | MGM-CPCStable | 500 | DD | 0.01  | 0.931 | 0.337 | 0.974 | 0.108 | 96.85  |
| 100 | MGM-CPCStable | 500 | DD | 0.03  | 0.903 | 0.337 | 1     | 0.127 | 96.5   |
| 100 | MGM-CPCStable | 500 | DD | 0.05  | 0.88  | 0.337 | 0.987 | 0.143 | 96.5   |

|     |               |     |    |       |       |       |       |       |        |
|-----|---------------|-----|----|-------|-------|-------|-------|-------|--------|
| 100 | MGM-CPCStable | 500 | DD | 0.08  | 0.871 | 0.337 | 0.976 | 0.151 | 96.5   |
| 100 | MGM-PCStable  | 100 | DD | 1e-04 | 0.995 | 0.2   | 0.401 | 0.09  | 108.05 |
| 100 | MGM-PCStable  | 100 | DD | 0.001 | 0.992 | 0.211 | 0.457 | 0.12  | 106.7  |
| 100 | MGM-PCStable  | 100 | DD | 0.01  | 0.956 | 0.225 | 0.44  | 0.143 | 107    |
| 100 | MGM-PCStable  | 100 | DD | 0.03  | 0.934 | 0.23  | 0.432 | 0.154 | 107.25 |
| 100 | MGM-PCStable  | 100 | DD | 0.05  | 0.926 | 0.233 | 0.438 | 0.159 | 107    |
| 100 | MGM-PCStable  | 100 | DD | 0.08  | 0.91  | 0.236 | 0.435 | 0.163 | 107.2  |
| 100 | MGM-PCStable  | 300 | DD | 1e-04 | 0.985 | 0.315 | 0.45  | 0.252 | 100.15 |
| 100 | MGM-PCStable  | 300 | DD | 0.001 | 0.957 | 0.32  | 0.443 | 0.262 | 100.3  |
| 100 | MGM-PCStable  | 300 | DD | 0.01  | 0.919 | 0.322 | 0.427 | 0.262 | 101.45 |
| 100 | MGM-PCStable  | 300 | DD | 0.03  | 0.891 | 0.323 | 0.414 | 0.263 | 102.45 |
| 100 | MGM-PCStable  | 300 | DD | 0.05  | 0.875 | 0.323 | 0.407 | 0.263 | 103.15 |
| 100 | MGM-PCStable  | 300 | DD | 0.08  | 0.865 | 0.323 | 0.404 | 0.264 | 103.5  |
| 100 | MGM-PCStable  | 500 | DD | 1e-04 | 0.954 | 0.335 | 0.462 | 0.291 | 102.55 |
| 100 | MGM-PCStable  | 500 | DD | 0.001 | 0.952 | 0.337 | 0.468 | 0.298 | 102.45 |
| 100 | MGM-PCStable  | 500 | DD | 0.01  | 0.931 | 0.337 | 0.45  | 0.297 | 103.4  |
| 100 | MGM-PCStable  | 500 | DD | 0.03  | 0.903 | 0.337 | 0.44  | 0.298 | 104.2  |
| 100 | MGM-PCStable  | 500 | DD | 0.05  | 0.88  | 0.337 | 0.428 | 0.298 | 105    |
| 100 | MGM-PCStable  | 500 | DD | 0.08  | 0.871 | 0.337 | 0.424 | 0.298 | 105.4  |
| 100 | FGES          | 100 | DD | 1     | 0.974 | 0.232 | 0.645 | 0.106 | 102.4  |
| 100 | FGES          | 100 | DD | 1.5   | 0.974 | 0.233 | 0.634 | 0.108 | 102.35 |
| 100 | FGES          | 100 | DD | 2     | 0.977 | 0.238 | 0.616 | 0.111 | 102    |
| 100 | FGES          | 100 | DD | 3     | 0.974 | 0.238 | 0.616 | 0.117 | 102.1  |
| 100 | FGES          | 100 | DD | 4     | 0.972 | 0.239 | 0.611 | 0.118 | 102.15 |
| 100 | FGES          | 100 | DD | 5     | 0.97  | 0.239 | 0.602 | 0.117 | 102.2  |
| 100 | FGES          | 300 | DD | 1     | 0.997 | 0.301 | 0.603 | 0.154 | 96     |
| 100 | FGES          | 300 | DD | 1.5   | 0.997 | 0.302 | 0.602 | 0.154 | 96     |
| 100 | FGES          | 300 | DD | 2     | 0.997 | 0.302 | 0.603 | 0.155 | 95.95  |
| 100 | FGES          | 300 | DD | 3     | 0.997 | 0.303 | 0.605 | 0.158 | 95.85  |
| 100 | FGES          | 300 | DD | 4     | 0.997 | 0.303 | 0.605 | 0.158 | 95.85  |
| 100 | FGES          | 300 | DD | 5     | 0.997 | 0.303 | 0.604 | 0.158 | 95.9   |
| 100 | FGES          | 500 | DD | 1     | 1     | 0.355 | 0.62  | 0.177 | 96.55  |
| 100 | FGES          | 500 | DD | 1.5   | 1     | 0.355 | 0.622 | 0.18  | 96.4   |
| 100 | FGES          | 500 | DD | 2     | 1     | 0.355 | 0.622 | 0.18  | 96.4   |
| 100 | FGES          | 500 | DD | 3     | 1     | 0.355 | 0.624 | 0.18  | 96.35  |
| 100 | FGES          | 500 | DD | 4     | 1     | 0.356 | 0.624 | 0.18  | 96.3   |
| 100 | FGES          | 500 | DD | 5     | 1     | 0.357 | 0.629 | 0.179 | 96.25  |
| 100 | MGM-PCMax     | 100 | DD | 1e-04 | 0.983 | 0.201 | 0.308 | 0.043 | 108.75 |
| 100 | MGM-PCMax     | 100 | DD | 0.001 | 0.975 | 0.212 | 0.381 | 0.06  | 107.55 |
| 100 | MGM-PCMax     | 100 | DD | 0.01  | 0.949 | 0.225 | 0.356 | 0.072 | 107.5  |
| 100 | MGM-PCMax     | 100 | DD | 0.03  | 0.934 | 0.23  | 0.36  | 0.078 | 107.4  |
| 100 | MGM-PCMax     | 100 | DD | 0.05  | 0.918 | 0.233 | 0.349 | 0.079 | 107.85 |
| 100 | MGM-PCMax     | 100 | DD | 0.08  | 0.906 | 0.236 | 0.355 | 0.082 | 107.8  |
| 100 | MGM-PCMax     | 300 | DD | 1e-04 | 0.951 | 0.317 | 0.31  | 0.093 | 103.85 |
| 100 | MGM-PCMax     | 300 | DD | 0.001 | 0.936 | 0.32  | 0.313 | 0.099 | 103.85 |



EVALUATION OF CAUSAL STRUCTURE LEARNING

|     |           |     |    |       |       |       |       |       |        |
|-----|-----------|-----|----|-------|-------|-------|-------|-------|--------|
| 100 | MGM-PCMax | 300 | DD | 0.01  | 0.909 | 0.322 | 0.325 | 0.104 | 104.1  |
| 100 | MGM-PCMax | 300 | DD | 0.03  | 0.886 | 0.323 | 0.319 | 0.106 | 105.05 |
| 100 | MGM-PCMax | 300 | DD | 0.05  | 0.873 | 0.323 | 0.312 | 0.106 | 105.65 |
| 100 | MGM-PCMax | 300 | DD | 0.08  | 0.865 | 0.323 | 0.307 | 0.106 | 106.1  |
| 100 | MGM-PCMax | 500 | DD | 1e-04 | 0.952 | 0.335 | 0.378 | 0.121 | 106.5  |
| 100 | MGM-PCMax | 500 | DD | 0.001 | 0.95  | 0.337 | 0.393 | 0.131 | 105.75 |
| 100 | MGM-PCMax | 500 | DD | 0.01  | 0.926 | 0.337 | 0.383 | 0.13  | 106.75 |
| 100 | MGM-PCMax | 500 | DD | 0.03  | 0.901 | 0.337 | 0.366 | 0.127 | 107.85 |
| 100 | MGM-PCMax | 500 | DD | 0.05  | 0.88  | 0.337 | 0.35  | 0.126 | 108.8  |
| 100 | MGM-PCMax | 500 | DD | 0.08  | 0.869 | 0.337 | 0.343 | 0.125 | 109.4  |

Table 9: Comparison of mixed data structure learning algorithms with Conditional Gaussian Simulated data with average density 1.5

| Num_Vars | Algorithm     | Sample.Size | Type | Parameter | AP    | AR    | AHP   | AHR   | SHD    |
|----------|---------------|-------------|------|-----------|-------|-------|-------|-------|--------|
| 50       | Copula-PC     | 100         | All  | 1e-04     | 0.952 | 0.095 | 0.786 | 0.008 | 181.1  |
| 50       | Copula-PC     | 100         | All  | 0.001     | 0.885 | 0.117 | 0.9   | 0.018 | 179.95 |
| 50       | Copula-PC     | 100         | All  | 0.01      | 0.681 | 0.146 | 0.894 | 0.023 | 187    |
| 50       | Copula-PC     | 100         | All  | 0.03      | 0.536 | 0.17  | 0.822 | 0.026 | 198.6  |
| 50       | Copula-PC     | 100         | All  | 0.05      | 0.465 | 0.191 | 0.68  | 0.031 | 210.2  |
| 50       | Copula-PC     | 100         | All  | 0.08      | 0.386 | 0.209 | 0.508 | 0.034 | 229.6  |
| 50       | Copula-PC     | 300         | All  | 1e-04     | 0.902 | 0.213 | 0.927 | 0.036 | 156.75 |
| 50       | Copula-PC     | 300         | All  | 0.001     | 0.828 | 0.247 | 0.81  | 0.043 | 158.3  |
| 50       | Copula-PC     | 300         | All  | 0.01      | 0.628 | 0.287 | 0.744 | 0.059 | 173.6  |
| 50       | Copula-PC     | 300         | All  | 0.03      | 0.497 | 0.313 | 0.595 | 0.071 | 195.4  |
| 50       | Copula-PC     | 300         | All  | 0.05      | 0.429 | 0.331 | 0.542 | 0.084 | 214.45 |
| 50       | Copula-PC     | 300         | All  | 0.08      | 0.37  | 0.349 | 0.416 | 0.096 | 239.05 |
| 50       | Copula-PC     | 500         | All  | 1e-04     | 0.807 | 0.297 | 0.697 | 0.053 | 142.7  |
| 50       | Copula-PC     | 500         | All  | 0.001     | 0.718 | 0.334 | 0.618 | 0.065 | 147.9  |
| 50       | Copula-PC     | 500         | All  | 0.01      | 0.555 | 0.384 | 0.463 | 0.081 | 169.05 |
| 50       | Copula-PC     | 500         | All  | 0.03      | 0.448 | 0.415 | 0.4   | 0.102 | 195.65 |
| 50       | Copula-PC     | 500         | All  | 0.05      | 0.398 | 0.437 | 0.363 | 0.122 | 215.4  |
| 50       | Copula-PC     | 500         | All  | 0.08      | 0.344 | 0.454 | 0.316 | 0.144 | 244    |
| 50       | MGM-CPCStable | 100         | All  | 1e-04     | 0.98  | 0.128 | 0.333 | 0.002 | 178.45 |
| 50       | MGM-CPCStable | 100         | All  | 0.001     | 0.953 | 0.144 | 0.643 | 0.006 | 177.55 |
| 50       | MGM-CPCStable | 100         | All  | 0.01      | 0.912 | 0.158 | 0.75  | 0.013 | 177    |
| 50       | MGM-CPCStable | 100         | All  | 0.03      | 0.911 | 0.162 | 0.833 | 0.013 | 176.7  |
| 50       | MGM-CPCStable | 100         | All  | 0.05      | 0.909 | 0.162 | 0.833 | 0.013 | 176.7  |
| 50       | MGM-CPCStable | 100         | All  | 0.08      | 0.906 | 0.162 | 0.821 | 0.014 | 176.7  |
| 50       | MGM-CPCStable | 300         | All  | 1e-04     | 0.992 | 0.231 | 0.929 | 0.024 | 153.05 |
| 50       | MGM-CPCStable | 300         | All  | 0.001     | 0.986 | 0.242 | 0.946 | 0.029 | 152    |
| 50       | MGM-CPCStable | 300         | All  | 0.01      | 0.984 | 0.247 | 0.911 | 0.036 | 151.2  |
| 50       | MGM-CPCStable | 300         | All  | 0.03      | 0.984 | 0.247 | 0.917 | 0.038 | 150.95 |
| 50       | MGM-CPCStable | 300         | All  | 0.05      | 0.984 | 0.248 | 0.917 | 0.039 | 150.8  |
| 50       | MGM-CPCStable | 300         | All  | 0.08      | 0.979 | 0.248 | 0.931 | 0.042 | 150.8  |

|    |               |     |     |       |       |       |       |       |        |
|----|---------------|-----|-----|-------|-------|-------|-------|-------|--------|
| 50 | MGM-CPCStable | 500 | All | 1e-04 | 0.989 | 0.279 | 1     | 0.033 | 135.45 |
| 50 | MGM-CPCStable | 500 | All | 0.001 | 0.989 | 0.286 | 1     | 0.037 | 134.75 |
| 50 | MGM-CPCStable | 500 | All | 0.01  | 0.989 | 0.287 | 1     | 0.041 | 134.35 |
| 50 | MGM-CPCStable | 500 | All | 0.03  | 0.983 | 0.289 | 1     | 0.041 | 134.45 |
| 50 | MGM-CPCStable | 500 | All | 0.05  | 0.981 | 0.291 | 0.994 | 0.042 | 134.3  |
| 50 | MGM-CPCStable | 500 | All | 0.08  | 0.981 | 0.291 | 0.938 | 0.049 | 134.1  |
| 50 | MGM-PCStable  | 100 | All | 1e-04 | 0.98  | 0.128 | 0.449 | 0.027 | 179.3  |
| 50 | MGM-PCStable  | 100 | All | 0.001 | 0.953 | 0.144 | 0.414 | 0.041 | 179.25 |
| 50 | MGM-PCStable  | 100 | All | 0.01  | 0.912 | 0.158 | 0.393 | 0.051 | 179.7  |
| 50 | MGM-PCStable  | 100 | All | 0.03  | 0.911 | 0.162 | 0.397 | 0.054 | 179.5  |
| 50 | MGM-PCStable  | 100 | All | 0.05  | 0.909 | 0.162 | 0.394 | 0.054 | 179.65 |
| 50 | MGM-PCStable  | 100 | All | 0.08  | 0.906 | 0.162 | 0.393 | 0.054 | 179.8  |
| 50 | MGM-PCStable  | 300 | All | 1e-04 | 0.992 | 0.231 | 0.446 | 0.104 | 156.75 |
| 50 | MGM-PCStable  | 300 | All | 0.001 | 0.986 | 0.242 | 0.445 | 0.112 | 156.3  |
| 50 | MGM-PCStable  | 300 | All | 0.01  | 0.984 | 0.247 | 0.441 | 0.114 | 156.25 |
| 50 | MGM-PCStable  | 300 | All | 0.03  | 0.984 | 0.247 | 0.44  | 0.114 | 156.25 |
| 50 | MGM-PCStable  | 300 | All | 0.05  | 0.984 | 0.248 | 0.44  | 0.115 | 156.2  |
| 50 | MGM-PCStable  | 300 | All | 0.08  | 0.979 | 0.248 | 0.439 | 0.115 | 156.5  |
| 50 | MGM-PCStable  | 500 | All | 1e-04 | 0.989 | 0.279 | 0.403 | 0.11  | 141.05 |
| 50 | MGM-PCStable  | 500 | All | 0.001 | 0.989 | 0.286 | 0.394 | 0.113 | 141    |
| 50 | MGM-PCStable  | 500 | All | 0.01  | 0.989 | 0.287 | 0.389 | 0.113 | 141.1  |
| 50 | MGM-PCStable  | 500 | All | 0.03  | 0.983 | 0.289 | 0.383 | 0.114 | 141.3  |
| 50 | MGM-PCStable  | 500 | All | 0.05  | 0.981 | 0.291 | 0.38  | 0.115 | 141.3  |
| 50 | MGM-PCStable  | 500 | All | 0.08  | 0.981 | 0.291 | 0.38  | 0.115 | 141.3  |
| 50 | FGES          | 100 | All | 1     | 0.748 | 0.245 | 0.685 | 0.081 | 176    |
| 50 | FGES          | 100 | All | 1.5   | 0.719 | 0.25  | 0.657 | 0.085 | 177.9  |
| 50 | FGES          | 100 | All | 2     | 0.701 | 0.255 | 0.652 | 0.091 | 179.4  |
| 50 | FGES          | 100 | All | 3     | 0.665 | 0.258 | 0.611 | 0.102 | 182    |
| 50 | FGES          | 100 | All | 4     | 0.646 | 0.262 | 0.598 | 0.105 | 184.1  |
| 50 | FGES          | 100 | All | 5     | 0.635 | 0.267 | 0.569 | 0.113 | 185.05 |
| 50 | FGES          | 300 | All | 1     | 0.888 | 0.434 | 0.795 | 0.207 | 131.2  |
| 50 | FGES          | 300 | All | 1.5   | 0.876 | 0.443 | 0.766 | 0.216 | 131.45 |
| 50 | FGES          | 300 | All | 2     | 0.873 | 0.444 | 0.757 | 0.223 | 131.55 |
| 50 | FGES          | 300 | All | 3     | 0.867 | 0.449 | 0.748 | 0.223 | 131.85 |
| 50 | FGES          | 300 | All | 4     | 0.863 | 0.453 | 0.745 | 0.225 | 131.95 |
| 50 | FGES          | 300 | All | 5     | 0.856 | 0.454 | 0.729 | 0.23  | 132.45 |
| 50 | FGES          | 500 | All | 1     | 0.908 | 0.523 | 0.812 | 0.24  | 111.4  |
| 50 | FGES          | 500 | All | 1.5   | 0.901 | 0.524 | 0.8   | 0.241 | 112.2  |
| 50 | FGES          | 500 | All | 2     | 0.893 | 0.526 | 0.8   | 0.243 | 112.45 |
| 50 | FGES          | 500 | All | 3     | 0.888 | 0.53  | 0.788 | 0.247 | 112.6  |
| 50 | FGES          | 500 | All | 4     | 0.881 | 0.533 | 0.76  | 0.25  | 113.15 |
| 50 | FGES          | 500 | All | 5     | 0.875 | 0.537 | 0.746 | 0.255 | 113.2  |
| 50 | MGM-PCMax     | 100 | All | 1e-04 | 0.981 | 0.132 | 0.277 | 0.012 | 179.35 |
| 50 | MGM-PCMax     | 100 | All | 0.001 | 0.953 | 0.146 | 0.275 | 0.019 | 179.35 |
| 50 | MGM-PCMax     | 100 | All | 0.01  | 0.912 | 0.159 | 0.291 | 0.023 | 180.2  |

EVALUATION OF CAUSAL STRUCTURE LEARNING

|    |               |     |     |       |       |       |       |       |        |
|----|---------------|-----|-----|-------|-------|-------|-------|-------|--------|
| 50 | MGM-PCMax     | 100 | All | 0.03  | 0.911 | 0.162 | 0.31  | 0.027 | 180    |
| 50 | MGM-PCMax     | 100 | All | 0.05  | 0.909 | 0.162 | 0.31  | 0.027 | 180.1  |
| 50 | MGM-PCMax     | 100 | All | 0.08  | 0.906 | 0.162 | 0.309 | 0.027 | 180.25 |
| 50 | MGM-PCMax     | 300 | All | 1e-04 | 0.989 | 0.231 | 0.285 | 0.043 | 159.2  |
| 50 | MGM-PCMax     | 300 | All | 0.001 | 0.986 | 0.242 | 0.297 | 0.046 | 158.75 |
| 50 | MGM-PCMax     | 300 | All | 0.01  | 0.984 | 0.247 | 0.292 | 0.047 | 158.75 |
| 50 | MGM-PCMax     | 300 | All | 0.03  | 0.984 | 0.247 | 0.297 | 0.048 | 158.65 |
| 50 | MGM-PCMax     | 300 | All | 0.05  | 0.984 | 0.248 | 0.298 | 0.048 | 158.6  |
| 50 | MGM-PCMax     | 300 | All | 0.08  | 0.979 | 0.248 | 0.298 | 0.049 | 158.8  |
| 50 | MGM-PCMax     | 500 | All | 1e-04 | 0.989 | 0.28  | 0.28  | 0.055 | 142.75 |
| 50 | MGM-PCMax     | 500 | All | 0.001 | 0.989 | 0.287 | 0.286 | 0.057 | 142.65 |
| 50 | MGM-PCMax     | 500 | All | 0.01  | 0.989 | 0.288 | 0.28  | 0.056 | 142.7  |
| 50 | MGM-PCMax     | 500 | All | 0.03  | 0.983 | 0.29  | 0.282 | 0.058 | 142.65 |
| 50 | MGM-PCMax     | 500 | All | 0.05  | 0.978 | 0.291 | 0.285 | 0.06  | 142.6  |
| 50 | MGM-PCMax     | 500 | All | 0.08  | 0.978 | 0.291 | 0.285 | 0.06  | 142.6  |
| 50 | Copula-PC     | 100 | CC  | 1e-04 | 0.962 | 0.126 | 1     | 0.005 | 43.5   |
| 50 | Copula-PC     | 100 | CC  | 0.001 | 0.862 | 0.144 | 1     | 0.014 | 43.8   |
| 50 | Copula-PC     | 100 | CC  | 0.01  | 0.752 | 0.16  | 0.857 | 0.019 | 44.7   |
| 50 | Copula-PC     | 100 | CC  | 0.03  | 0.588 | 0.178 | 0.786 | 0.019 | 47.35  |
| 50 | Copula-PC     | 100 | CC  | 0.05  | 0.501 | 0.201 | 0.5   | 0.024 | 49.95  |
| 50 | Copula-PC     | 100 | CC  | 0.08  | 0.414 | 0.221 | 0.411 | 0.024 | 54.6   |
| 50 | Copula-PC     | 300 | CC  | 1e-04 | 0.915 | 0.386 | 0.982 | 0.108 | 32.65  |
| 50 | Copula-PC     | 300 | CC  | 0.001 | 0.912 | 0.432 | 0.982 | 0.116 | 31.85  |
| 50 | Copula-PC     | 300 | CC  | 0.01  | 0.783 | 0.493 | 0.841 | 0.163 | 33.2   |
| 50 | Copula-PC     | 300 | CC  | 0.03  | 0.709 | 0.536 | 0.811 | 0.186 | 35.35  |
| 50 | Copula-PC     | 300 | CC  | 0.05  | 0.638 | 0.56  | 0.786 | 0.204 | 38.65  |
| 50 | Copula-PC     | 300 | CC  | 0.08  | 0.571 | 0.569 | 0.707 | 0.217 | 42.5   |
| 50 | Copula-PC     | 500 | CC  | 1e-04 | 0.953 | 0.515 | 0.919 | 0.131 | 28.5   |
| 50 | Copula-PC     | 500 | CC  | 0.001 | 0.934 | 0.557 | 0.916 | 0.148 | 27.45  |
| 50 | Copula-PC     | 500 | CC  | 0.01  | 0.821 | 0.601 | 0.755 | 0.162 | 29.7   |
| 50 | Copula-PC     | 500 | CC  | 0.03  | 0.746 | 0.646 | 0.665 | 0.182 | 32.85  |
| 50 | Copula-PC     | 500 | CC  | 0.05  | 0.695 | 0.661 | 0.631 | 0.204 | 34.8   |
| 50 | Copula-PC     | 500 | CC  | 0.08  | 0.607 | 0.679 | 0.582 | 0.24  | 39.95  |
| 50 | MGM-CPCStable | 100 | CC  | 1e-04 | 1     | 0.157 | NA    | 0     | 42.85  |
| 50 | MGM-CPCStable | 100 | CC  | 0.001 | 0.983 | 0.172 | 1     | 0.011 | 42.5   |
| 50 | MGM-CPCStable | 100 | CC  | 0.01  | 0.942 | 0.192 | 1     | 0.015 | 42.3   |
| 50 | MGM-CPCStable | 100 | CC  | 0.03  | 0.946 | 0.196 | 1     | 0.015 | 42.2   |
| 50 | MGM-CPCStable | 100 | CC  | 0.05  | 0.946 | 0.196 | 1     | 0.015 | 42.2   |
| 50 | MGM-CPCStable | 100 | CC  | 0.08  | 0.946 | 0.196 | 1     | 0.015 | 42.2   |
| 50 | MGM-CPCStable | 300 | CC  | 1e-04 | 0.988 | 0.388 | 0.97  | 0.064 | 32.95  |
| 50 | MGM-CPCStable | 300 | CC  | 0.001 | 0.988 | 0.41  | 0.972 | 0.073 | 32.45  |
| 50 | MGM-CPCStable | 300 | CC  | 0.01  | 0.988 | 0.42  | 0.903 | 0.087 | 31.95  |
| 50 | MGM-CPCStable | 300 | CC  | 0.03  | 0.988 | 0.42  | 0.903 | 0.087 | 31.95  |
| 50 | MGM-CPCStable | 300 | CC  | 0.05  | 0.988 | 0.42  | 0.903 | 0.091 | 31.85  |
| 50 | MGM-CPCStable | 300 | CC  | 0.08  | 0.983 | 0.42  | 0.91  | 0.105 | 31.75  |

|    |               |     |    |       |       |       |       |       |       |
|----|---------------|-----|----|-------|-------|-------|-------|-------|-------|
| 50 | MGM-CPCStable | 500 | CC | 1e-04 | 0.991 | 0.436 | 1     | 0.104 | 29.85 |
| 50 | MGM-CPCStable | 500 | CC | 0.001 | 0.991 | 0.452 | 1     | 0.109 | 29.6  |
| 50 | MGM-CPCStable | 500 | CC | 0.01  | 0.991 | 0.454 | 1     | 0.109 | 29.55 |
| 50 | MGM-CPCStable | 500 | CC | 0.03  | 0.977 | 0.457 | 1     | 0.109 | 29.7  |
| 50 | MGM-CPCStable | 500 | CC | 0.05  | 0.961 | 0.457 | 0.992 | 0.111 | 29.8  |
| 50 | MGM-CPCStable | 500 | CC | 0.08  | 0.961 | 0.457 | 1     | 0.117 | 29.7  |
| 50 | MGM-PCStable  | 100 | CC | 1e-04 | 1     | 0.157 | 0.462 | 0.02  | 43.45 |
| 50 | MGM-PCStable  | 100 | CC | 0.001 | 0.983 | 0.172 | 0.42  | 0.039 | 43.25 |
| 50 | MGM-PCStable  | 100 | CC | 0.01  | 0.942 | 0.192 | 0.317 | 0.043 | 43.5  |
| 50 | MGM-PCStable  | 100 | CC | 0.03  | 0.946 | 0.196 | 0.318 | 0.048 | 43.4  |
| 50 | MGM-PCStable  | 100 | CC | 0.05  | 0.946 | 0.196 | 0.318 | 0.048 | 43.4  |
| 50 | MGM-PCStable  | 100 | CC | 0.08  | 0.946 | 0.196 | 0.318 | 0.048 | 43.4  |
| 50 | MGM-PCStable  | 300 | CC | 1e-04 | 0.988 | 0.388 | 0.526 | 0.214 | 33.7  |
| 50 | MGM-PCStable  | 300 | CC | 0.001 | 0.988 | 0.41  | 0.531 | 0.226 | 33.3  |
| 50 | MGM-PCStable  | 300 | CC | 0.01  | 0.988 | 0.42  | 0.512 | 0.233 | 33.25 |
| 50 | MGM-PCStable  | 300 | CC | 0.03  | 0.988 | 0.42  | 0.512 | 0.233 | 33.25 |
| 50 | MGM-PCStable  | 300 | CC | 0.05  | 0.988 | 0.42  | 0.512 | 0.233 | 33.25 |
| 50 | MGM-PCStable  | 300 | CC | 0.08  | 0.983 | 0.42  | 0.51  | 0.233 | 33.35 |
| 50 | MGM-PCStable  | 500 | CC | 1e-04 | 0.991 | 0.436 | 0.421 | 0.193 | 32.55 |
| 50 | MGM-PCStable  | 500 | CC | 0.001 | 0.991 | 0.452 | 0.388 | 0.193 | 32.6  |
| 50 | MGM-PCStable  | 500 | CC | 0.01  | 0.991 | 0.454 | 0.383 | 0.193 | 32.65 |
| 50 | MGM-PCStable  | 500 | CC | 0.03  | 0.977 | 0.457 | 0.383 | 0.193 | 32.8  |
| 50 | MGM-PCStable  | 500 | CC | 0.05  | 0.961 | 0.457 | 0.364 | 0.193 | 32.9  |
| 50 | MGM-PCStable  | 500 | CC | 0.08  | 0.961 | 0.457 | 0.364 | 0.193 | 32.9  |
| 50 | FGES          | 100 | CC | 1     | 0.772 | 0.263 | 0.674 | 0.083 | 42.4  |
| 50 | FGES          | 100 | CC | 1.5   | 0.742 | 0.269 | 0.665 | 0.084 | 42.85 |
| 50 | FGES          | 100 | CC | 2     | 0.724 | 0.273 | 0.686 | 0.094 | 43.05 |
| 50 | FGES          | 100 | CC | 3     | 0.712 | 0.277 | 0.661 | 0.109 | 43.15 |
| 50 | FGES          | 100 | CC | 4     | 0.693 | 0.279 | 0.648 | 0.111 | 43.55 |
| 50 | FGES          | 100 | CC | 5     | 0.69  | 0.291 | 0.613 | 0.117 | 43.55 |
| 50 | FGES          | 300 | CC | 1     | 0.929 | 0.571 | 0.853 | 0.334 | 26.45 |
| 50 | FGES          | 300 | CC | 1.5   | 0.93  | 0.585 | 0.841 | 0.358 | 26    |
| 50 | FGES          | 300 | CC | 2     | 0.927 | 0.586 | 0.828 | 0.358 | 26.2  |
| 50 | FGES          | 300 | CC | 3     | 0.904 | 0.59  | 0.809 | 0.354 | 26.7  |
| 50 | FGES          | 300 | CC | 4     | 0.902 | 0.597 | 0.807 | 0.354 | 26.7  |
| 50 | FGES          | 300 | CC | 5     | 0.902 | 0.597 | 0.807 | 0.363 | 26.6  |
| 50 | FGES          | 500 | CC | 1     | 0.918 | 0.667 | 0.816 | 0.346 | 23.1  |
| 50 | FGES          | 500 | CC | 1.5   | 0.902 | 0.667 | 0.801 | 0.346 | 23.65 |
| 50 | FGES          | 500 | CC | 2     | 0.9   | 0.671 | 0.801 | 0.348 | 23.6  |
| 50 | FGES          | 500 | CC | 3     | 0.897 | 0.673 | 0.779 | 0.35  | 23.65 |
| 50 | FGES          | 500 | CC | 4     | 0.893 | 0.673 | 0.755 | 0.354 | 23.75 |
| 50 | FGES          | 500 | CC | 5     | 0.886 | 0.677 | 0.748 | 0.356 | 23.9  |
| 50 | MGM-PCMax     | 100 | CC | 1e-04 | 1     | 0.164 | 0.225 | 0.01  | 43.35 |
| 50 | MGM-PCMax     | 100 | CC | 0.001 | 0.983 | 0.175 | 0.321 | 0.018 | 43.25 |
| 50 | MGM-PCMax     | 100 | CC | 0.01  | 0.942 | 0.192 | 0.328 | 0.025 | 43.4  |

EVALUATION OF CAUSAL STRUCTURE LEARNING

|    |               |     |    |       |       |       |       |       |        |
|----|---------------|-----|----|-------|-------|-------|-------|-------|--------|
| 50 | MGM-PCMax     | 100 | CC | 0.03  | 0.946 | 0.196 | 0.301 | 0.029 | 43.35  |
| 50 | MGM-PCMax     | 100 | CC | 0.05  | 0.946 | 0.196 | 0.301 | 0.029 | 43.35  |
| 50 | MGM-PCMax     | 100 | CC | 0.08  | 0.946 | 0.196 | 0.301 | 0.029 | 43.35  |
| 50 | MGM-PCMax     | 300 | CC | 1e-04 | 0.984 | 0.388 | 0.341 | 0.067 | 36     |
| 50 | MGM-PCMax     | 300 | CC | 0.001 | 0.988 | 0.41  | 0.336 | 0.076 | 35.6   |
| 50 | MGM-PCMax     | 300 | CC | 0.01  | 0.988 | 0.42  | 0.329 | 0.079 | 35.55  |
| 50 | MGM-PCMax     | 300 | CC | 0.03  | 0.988 | 0.42  | 0.329 | 0.079 | 35.55  |
| 50 | MGM-PCMax     | 300 | CC | 0.05  | 0.988 | 0.42  | 0.329 | 0.079 | 35.55  |
| 50 | MGM-PCMax     | 300 | CC | 0.08  | 0.983 | 0.42  | 0.327 | 0.079 | 35.65  |
| 50 | MGM-PCMax     | 500 | CC | 1e-04 | 0.991 | 0.436 | 0.315 | 0.104 | 33.45  |
| 50 | MGM-PCMax     | 500 | CC | 0.001 | 0.991 | 0.452 | 0.294 | 0.107 | 33.45  |
| 50 | MGM-PCMax     | 500 | CC | 0.01  | 0.991 | 0.454 | 0.286 | 0.105 | 33.5   |
| 50 | MGM-PCMax     | 500 | CC | 0.03  | 0.977 | 0.457 | 0.284 | 0.109 | 33.6   |
| 50 | MGM-PCMax     | 500 | CC | 0.05  | 0.961 | 0.457 | 0.28  | 0.111 | 33.6   |
| 50 | MGM-PCMax     | 500 | CC | 0.08  | 0.961 | 0.457 | 0.28  | 0.111 | 33.6   |
| 50 | Copula-PC     | 100 | CD | 1e-04 | 0.932 | 0.086 | 0.667 | 0.006 | 92.15  |
| 50 | Copula-PC     | 100 | CD | 0.001 | 0.893 | 0.108 | 0.833 | 0.017 | 91     |
| 50 | Copula-PC     | 100 | CD | 0.01  | 0.663 | 0.142 | 0.857 | 0.022 | 95.2   |
| 50 | Copula-PC     | 100 | CD | 0.03  | 0.532 | 0.168 | 0.812 | 0.029 | 100.9  |
| 50 | Copula-PC     | 100 | CD | 0.05  | 0.466 | 0.188 | 0.711 | 0.033 | 106.7  |
| 50 | Copula-PC     | 100 | CD | 0.08  | 0.392 | 0.207 | 0.479 | 0.036 | 116.75 |
| 50 | Copula-PC     | 300 | CD | 1e-04 | 0.825 | 0.132 | 0.812 | 0.014 | 84.4   |
| 50 | Copula-PC     | 300 | CD | 0.001 | 0.712 | 0.16  | 0.667 | 0.022 | 85.75  |
| 50 | Copula-PC     | 300 | CD | 0.01  | 0.474 | 0.187 | 0.521 | 0.03  | 95.15  |
| 50 | Copula-PC     | 300 | CD | 0.03  | 0.36  | 0.204 | 0.448 | 0.04  | 107.95 |
| 50 | Copula-PC     | 300 | CD | 0.05  | 0.308 | 0.22  | 0.398 | 0.048 | 118.45 |
| 50 | Copula-PC     | 300 | CD | 0.08  | 0.266 | 0.242 | 0.256 | 0.056 | 132.5  |
| 50 | Copula-PC     | 500 | CD | 1e-04 | 0.778 | 0.176 | 0.471 | 0.014 | 76     |
| 50 | Copula-PC     | 500 | CD | 0.001 | 0.643 | 0.202 | 0.579 | 0.019 | 78.9   |
| 50 | Copula-PC     | 500 | CD | 0.01  | 0.464 | 0.243 | 0.329 | 0.033 | 88.95  |
| 50 | Copula-PC     | 500 | CD | 0.03  | 0.366 | 0.274 | 0.32  | 0.051 | 101.2  |
| 50 | Copula-PC     | 500 | CD | 0.05  | 0.313 | 0.29  | 0.291 | 0.056 | 112.5  |
| 50 | Copula-PC     | 500 | CD | 0.08  | 0.273 | 0.31  | 0.238 | 0.071 | 125.75 |
| 50 | MGM-CPCStable | 100 | CD | 1e-04 | 0.972 | 0.121 | 0.333 | 0.002 | 90.4   |
| 50 | MGM-CPCStable | 100 | CD | 0.001 | 0.934 | 0.137 | 0.5   | 0.004 | 90.35  |
| 50 | MGM-CPCStable | 100 | CD | 0.01  | 0.889 | 0.148 | 0.667 | 0.011 | 90.1   |
| 50 | MGM-CPCStable | 100 | CD | 0.03  | 0.891 | 0.153 | 0.75  | 0.011 | 89.8   |
| 50 | MGM-CPCStable | 100 | CD | 0.05  | 0.887 | 0.154 | 0.857 | 0.011 | 89.75  |
| 50 | MGM-CPCStable | 100 | CD | 0.08  | 0.883 | 0.154 | 0.821 | 0.013 | 89.8   |
| 50 | MGM-CPCStable | 300 | CD | 1e-04 | 1     | 0.141 | 0.857 | 0.012 | 82.35  |
| 50 | MGM-CPCStable | 300 | CD | 0.001 | 0.992 | 0.15  | 0.857 | 0.014 | 82     |
| 50 | MGM-CPCStable | 300 | CD | 0.01  | 0.987 | 0.151 | 0.778 | 0.017 | 82     |
| 50 | MGM-CPCStable | 300 | CD | 0.03  | 0.987 | 0.151 | 0.8   | 0.018 | 81.9   |
| 50 | MGM-CPCStable | 300 | CD | 0.05  | 0.987 | 0.152 | 0.8   | 0.018 | 81.85  |
| 50 | MGM-CPCStable | 300 | CD | 0.08  | 0.983 | 0.152 | 0.8   | 0.018 | 81.95  |

|    |               |     |    |       |       |       |       |       |       |
|----|---------------|-----|----|-------|-------|-------|-------|-------|-------|
| 50 | MGM-CPCStable | 500 | CD | 1e-04 | 0.994 | 0.192 | 1     | 0.007 | 73    |
| 50 | MGM-CPCStable | 500 | CD | 0.001 | 0.995 | 0.2   | 1     | 0.009 | 72.7  |
| 50 | MGM-CPCStable | 500 | CD | 0.01  | 0.995 | 0.201 | 1     | 0.012 | 72.5  |
| 50 | MGM-CPCStable | 500 | CD | 0.03  | 0.995 | 0.203 | 1     | 0.012 | 72.45 |
| 50 | MGM-CPCStable | 500 | CD | 0.05  | 0.996 | 0.206 | 1     | 0.015 | 72.2  |
| 50 | MGM-CPCStable | 500 | CD | 0.08  | 0.996 | 0.206 | 0.864 | 0.025 | 72.15 |
| 50 | MGM-PCStable  | 100 | CD | 1e-04 | 0.972 | 0.121 | 0.529 | 0.028 | 90.55 |
| 50 | MGM-PCStable  | 100 | CD | 0.001 | 0.934 | 0.137 | 0.449 | 0.041 | 90.75 |
| 50 | MGM-PCStable  | 100 | CD | 0.01  | 0.889 | 0.148 | 0.426 | 0.052 | 90.85 |
| 50 | MGM-PCStable  | 100 | CD | 0.03  | 0.891 | 0.153 | 0.456 | 0.054 | 90.7  |
| 50 | MGM-PCStable  | 100 | CD | 0.05  | 0.887 | 0.154 | 0.449 | 0.054 | 90.9  |
| 50 | MGM-PCStable  | 100 | CD | 0.08  | 0.883 | 0.154 | 0.446 | 0.054 | 91.05 |
| 50 | MGM-PCStable  | 300 | CD | 1e-04 | 1     | 0.141 | 0.391 | 0.06  | 84    |
| 50 | MGM-PCStable  | 300 | CD | 0.001 | 0.992 | 0.15  | 0.387 | 0.067 | 83.8  |
| 50 | MGM-PCStable  | 300 | CD | 0.01  | 0.987 | 0.151 | 0.399 | 0.068 | 83.85 |
| 50 | MGM-PCStable  | 300 | CD | 0.03  | 0.987 | 0.151 | 0.399 | 0.068 | 83.85 |
| 50 | MGM-PCStable  | 300 | CD | 0.05  | 0.987 | 0.152 | 0.401 | 0.069 | 83.8  |
| 50 | MGM-PCStable  | 300 | CD | 0.08  | 0.983 | 0.152 | 0.401 | 0.069 | 83.9  |
| 50 | MGM-PCStable  | 500 | CD | 1e-04 | 0.994 | 0.192 | 0.374 | 0.068 | 74.75 |
| 50 | MGM-PCStable  | 500 | CD | 0.001 | 0.995 | 0.2   | 0.372 | 0.073 | 74.55 |
| 50 | MGM-PCStable  | 500 | CD | 0.01  | 0.995 | 0.201 | 0.366 | 0.073 | 74.6  |
| 50 | MGM-PCStable  | 500 | CD | 0.03  | 0.995 | 0.203 | 0.341 | 0.075 | 74.65 |
| 50 | MGM-PCStable  | 500 | CD | 0.05  | 0.996 | 0.206 | 0.339 | 0.078 | 74.55 |
| 50 | MGM-PCStable  | 500 | CD | 0.08  | 0.996 | 0.206 | 0.339 | 0.078 | 74.55 |
| 50 | FGES          | 100 | CD | 1     | 0.737 | 0.248 | 0.689 | 0.086 | 88.85 |
| 50 | FGES          | 100 | CD | 1.5   | 0.705 | 0.254 | 0.661 | 0.092 | 89.75 |
| 50 | FGES          | 100 | CD | 2     | 0.685 | 0.259 | 0.646 | 0.098 | 90.7  |
| 50 | FGES          | 100 | CD | 3     | 0.649 | 0.264 | 0.612 | 0.108 | 92.2  |
| 50 | FGES          | 100 | CD | 4     | 0.633 | 0.269 | 0.598 | 0.114 | 93.25 |
| 50 | FGES          | 100 | CD | 5     | 0.619 | 0.272 | 0.573 | 0.121 | 93.95 |
| 50 | FGES          | 300 | CD | 1     | 0.83  | 0.365 | 0.702 | 0.156 | 73.9  |
| 50 | FGES          | 300 | CD | 1.5   | 0.815 | 0.372 | 0.688 | 0.165 | 74.15 |
| 50 | FGES          | 300 | CD | 2     | 0.811 | 0.373 | 0.68  | 0.171 | 74.2  |
| 50 | FGES          | 300 | CD | 3     | 0.809 | 0.377 | 0.683 | 0.172 | 74.1  |
| 50 | FGES          | 300 | CD | 4     | 0.804 | 0.38  | 0.684 | 0.176 | 74.1  |
| 50 | FGES          | 300 | CD | 5     | 0.794 | 0.381 | 0.664 | 0.18  | 74.55 |
| 50 | FGES          | 500 | CD | 1     | 0.874 | 0.454 | 0.762 | 0.187 | 62.7  |
| 50 | FGES          | 500 | CD | 1.5   | 0.869 | 0.455 | 0.749 | 0.189 | 63    |
| 50 | FGES          | 500 | CD | 2     | 0.854 | 0.459 | 0.747 | 0.189 | 63.35 |
| 50 | FGES          | 500 | CD | 3     | 0.845 | 0.462 | 0.737 | 0.193 | 63.5  |
| 50 | FGES          | 500 | CD | 4     | 0.834 | 0.466 | 0.711 | 0.199 | 63.85 |
| 50 | FGES          | 500 | CD | 5     | 0.828 | 0.469 | 0.697 | 0.206 | 63.75 |
| 50 | MGM-PCMax     | 100 | CD | 1e-04 | 0.972 | 0.124 | 0.446 | 0.014 | 90.6  |
| 50 | MGM-PCMax     | 100 | CD | 0.001 | 0.934 | 0.14  | 0.331 | 0.02  | 91    |
| 50 | MGM-PCMax     | 100 | CD | 0.01  | 0.891 | 0.15  | 0.327 | 0.022 | 91.4  |

EVALUATION OF CAUSAL STRUCTURE LEARNING

|    |               |     |    |       |       |       |       |       |       |
|----|---------------|-----|----|-------|-------|-------|-------|-------|-------|
| 50 | MGM-PCMax     | 100 | CD | 0.03  | 0.891 | 0.153 | 0.337 | 0.026 | 91.25 |
| 50 | MGM-PCMax     | 100 | CD | 0.05  | 0.887 | 0.154 | 0.338 | 0.026 | 91.4  |
| 50 | MGM-PCMax     | 100 | CD | 0.08  | 0.883 | 0.154 | 0.338 | 0.026 | 91.55 |
| 50 | MGM-PCMax     | 300 | CD | 1e-04 | 1     | 0.141 | 0.382 | 0.03  | 84.25 |
| 50 | MGM-PCMax     | 300 | CD | 0.001 | 0.992 | 0.15  | 0.41  | 0.034 | 84    |
| 50 | MGM-PCMax     | 300 | CD | 0.01  | 0.987 | 0.151 | 0.385 | 0.034 | 84.05 |
| 50 | MGM-PCMax     | 300 | CD | 0.03  | 0.987 | 0.151 | 0.385 | 0.034 | 84.05 |
| 50 | MGM-PCMax     | 300 | CD | 0.05  | 0.987 | 0.152 | 0.376 | 0.034 | 84.1  |
| 50 | MGM-PCMax     | 300 | CD | 0.08  | 0.983 | 0.152 | 0.381 | 0.035 | 84.1  |
| 50 | MGM-PCMax     | 500 | CD | 1e-04 | 0.994 | 0.192 | 0.217 | 0.034 | 75.05 |
| 50 | MGM-PCMax     | 500 | CD | 0.001 | 0.995 | 0.2   | 0.246 | 0.037 | 74.9  |
| 50 | MGM-PCMax     | 500 | CD | 0.01  | 0.995 | 0.201 | 0.246 | 0.037 | 74.9  |
| 50 | MGM-PCMax     | 500 | CD | 0.03  | 0.995 | 0.203 | 0.233 | 0.04  | 74.75 |
| 50 | MGM-PCMax     | 500 | CD | 0.05  | 0.991 | 0.206 | 0.238 | 0.042 | 74.7  |
| 50 | MGM-PCMax     | 500 | CD | 0.08  | 0.991 | 0.206 | 0.238 | 0.042 | 74.7  |
| 50 | Copula-PC     | 100 | DD | 1e-04 | 0.981 | 0.1   | 1     | 0.013 | 45.45 |
| 50 | Copula-PC     | 100 | DD | 0.001 | 0.896 | 0.125 | 1     | 0.022 | 45.15 |
| 50 | Copula-PC     | 100 | DD | 0.01  | 0.723 | 0.156 | 1     | 0.026 | 47.1  |
| 50 | Copula-PC     | 100 | DD | 0.03  | 0.552 | 0.179 | 0.917 | 0.027 | 50.35 |
| 50 | Copula-PC     | 100 | DD | 0.05  | 0.448 | 0.196 | 0.831 | 0.031 | 53.55 |
| 50 | Copula-PC     | 100 | DD | 0.08  | 0.373 | 0.209 | 0.711 | 0.038 | 58.25 |
| 50 | Copula-PC     | 300 | DD | 1e-04 | 0.887 | 0.23  | 0.8   | 0.014 | 39.7  |
| 50 | Copula-PC     | 300 | DD | 0.001 | 0.788 | 0.275 | 0.455 | 0.02  | 40.7  |
| 50 | Copula-PC     | 300 | DD | 0.01  | 0.62  | 0.32  | 0.513 | 0.028 | 45.25 |
| 50 | Copula-PC     | 300 | DD | 0.03  | 0.486 | 0.345 | 0.312 | 0.031 | 52.1  |
| 50 | Copula-PC     | 300 | DD | 0.05  | 0.422 | 0.357 | 0.358 | 0.046 | 57.35 |
| 50 | Copula-PC     | 300 | DD | 0.08  | 0.366 | 0.375 | 0.302 | 0.063 | 64.05 |
| 50 | Copula-PC     | 500 | DD | 1e-04 | 0.673 | 0.33  | 0.42  | 0.053 | 38.2  |
| 50 | Copula-PC     | 500 | DD | 0.001 | 0.592 | 0.375 | 0.361 | 0.072 | 41.55 |
| 50 | Copula-PC     | 500 | DD | 0.01  | 0.444 | 0.449 | 0.306 | 0.097 | 50.4  |
| 50 | Copula-PC     | 500 | DD | 0.03  | 0.353 | 0.475 | 0.305 | 0.129 | 61.6  |
| 50 | Copula-PC     | 500 | DD | 0.05  | 0.316 | 0.512 | 0.273 | 0.167 | 68.1  |
| 50 | Copula-PC     | 500 | DD | 0.08  | 0.275 | 0.524 | 0.226 | 0.191 | 78.3  |
| 50 | MGM-CPCStable | 100 | DD | 1e-04 | 0.97  | 0.132 | 1     | 0.004 | 45.2  |
| 50 | MGM-CPCStable | 100 | DD | 0.001 | 0.978 | 0.148 | 1     | 0.005 | 44.7  |
| 50 | MGM-CPCStable | 100 | DD | 0.01  | 0.932 | 0.161 | 1     | 0.014 | 44.6  |
| 50 | MGM-CPCStable | 100 | DD | 0.03  | 0.915 | 0.161 | 1     | 0.014 | 44.7  |
| 50 | MGM-CPCStable | 100 | DD | 0.05  | 0.915 | 0.161 | 0.8   | 0.014 | 44.75 |
| 50 | MGM-CPCStable | 100 | DD | 0.08  | 0.915 | 0.161 | 0.8   | 0.016 | 44.7  |
| 50 | MGM-CPCStable | 300 | DD | 1e-04 | 0.982 | 0.28  | 0.833 | 0.009 | 37.75 |
| 50 | MGM-CPCStable | 300 | DD | 0.001 | 0.976 | 0.289 | 0.875 | 0.014 | 37.55 |
| 50 | MGM-CPCStable | 300 | DD | 0.01  | 0.976 | 0.294 | 1     | 0.02  | 37.25 |
| 50 | MGM-CPCStable | 300 | DD | 0.03  | 0.976 | 0.296 | 1     | 0.024 | 37.1  |
| 50 | MGM-CPCStable | 300 | DD | 0.05  | 0.976 | 0.296 | 1     | 0.024 | 37.1  |
| 50 | MGM-CPCStable | 300 | DD | 0.08  | 0.969 | 0.296 | 1     | 0.028 | 37.1  |

|    |               |     |    |       |       |       |       |       |       |
|----|---------------|-----|----|-------|-------|-------|-------|-------|-------|
| 50 | MGM-CPCStable | 500 | DD | 1e-04 | 0.985 | 0.314 | 1     | 0.019 | 32.6  |
| 50 | MGM-CPCStable | 500 | DD | 0.001 | 0.985 | 0.314 | 1     | 0.026 | 32.45 |
| 50 | MGM-CPCStable | 500 | DD | 0.01  | 0.985 | 0.314 | 1     | 0.034 | 32.3  |
| 50 | MGM-CPCStable | 500 | DD | 0.03  | 0.985 | 0.314 | 1     | 0.034 | 32.3  |
| 50 | MGM-CPCStable | 500 | DD | 0.05  | 0.985 | 0.314 | 1     | 0.034 | 32.3  |
| 50 | MGM-CPCStable | 500 | DD | 0.08  | 0.985 | 0.314 | 1     | 0.036 | 32.25 |
| 50 | MGM-PCStable  | 100 | DD | 1e-04 | 0.97  | 0.132 | 0.444 | 0.026 | 45.3  |
| 50 | MGM-PCStable  | 100 | DD | 0.001 | 0.978 | 0.148 | 0.328 | 0.038 | 45.25 |
| 50 | MGM-PCStable  | 100 | DD | 0.01  | 0.932 | 0.161 | 0.313 | 0.052 | 45.35 |
| 50 | MGM-PCStable  | 100 | DD | 0.03  | 0.915 | 0.161 | 0.334 | 0.059 | 45.4  |
| 50 | MGM-PCStable  | 100 | DD | 0.05  | 0.915 | 0.161 | 0.365 | 0.061 | 45.35 |
| 50 | MGM-PCStable  | 100 | DD | 0.08  | 0.915 | 0.161 | 0.365 | 0.061 | 45.35 |
| 50 | MGM-PCStable  | 300 | DD | 1e-04 | 0.982 | 0.28  | 0.373 | 0.089 | 39.05 |
| 50 | MGM-PCStable  | 300 | DD | 0.001 | 0.976 | 0.289 | 0.359 | 0.094 | 39.2  |
| 50 | MGM-PCStable  | 300 | DD | 0.01  | 0.976 | 0.294 | 0.373 | 0.096 | 39.15 |
| 50 | MGM-PCStable  | 300 | DD | 0.03  | 0.976 | 0.296 | 0.346 | 0.096 | 39.15 |
| 50 | MGM-PCStable  | 300 | DD | 0.05  | 0.976 | 0.296 | 0.346 | 0.096 | 39.15 |
| 50 | MGM-PCStable  | 300 | DD | 0.08  | 0.969 | 0.296 | 0.343 | 0.096 | 39.25 |
| 50 | MGM-PCStable  | 500 | DD | 1e-04 | 0.985 | 0.314 | 0.37  | 0.121 | 33.75 |
| 50 | MGM-PCStable  | 500 | DD | 0.001 | 0.985 | 0.314 | 0.357 | 0.121 | 33.85 |
| 50 | MGM-PCStable  | 500 | DD | 0.01  | 0.985 | 0.314 | 0.357 | 0.121 | 33.85 |
| 50 | MGM-PCStable  | 500 | DD | 0.03  | 0.985 | 0.314 | 0.357 | 0.121 | 33.85 |
| 50 | MGM-PCStable  | 500 | DD | 0.05  | 0.985 | 0.314 | 0.357 | 0.121 | 33.85 |
| 50 | MGM-PCStable  | 500 | DD | 0.08  | 0.985 | 0.314 | 0.357 | 0.121 | 33.85 |
| 50 | FGES          | 100 | DD | 1     | 0.759 | 0.233 | 0.657 | 0.068 | 44.75 |
| 50 | FGES          | 100 | DD | 1.5   | 0.727 | 0.235 | 0.642 | 0.07  | 45.3  |
| 50 | FGES          | 100 | DD | 2     | 0.713 | 0.237 | 0.654 | 0.073 | 45.65 |
| 50 | FGES          | 100 | DD | 3     | 0.655 | 0.24  | 0.593 | 0.084 | 46.65 |
| 50 | FGES          | 100 | DD | 4     | 0.627 | 0.242 | 0.588 | 0.084 | 47.3  |
| 50 | FGES          | 100 | DD | 5     | 0.615 | 0.244 | 0.619 | 0.096 | 47.55 |
| 50 | FGES          | 300 | DD | 1     | 0.964 | 0.464 | 0.916 | 0.198 | 30.85 |
| 50 | FGES          | 300 | DD | 1.5   | 0.939 | 0.472 | 0.836 | 0.201 | 31.3  |
| 50 | FGES          | 300 | DD | 2     | 0.939 | 0.472 | 0.817 | 0.212 | 31.15 |
| 50 | FGES          | 300 | DD | 3     | 0.939 | 0.482 | 0.788 | 0.215 | 31.05 |
| 50 | FGES          | 300 | DD | 4     | 0.937 | 0.484 | 0.783 | 0.215 | 31.15 |
| 50 | FGES          | 300 | DD | 5     | 0.934 | 0.484 | 0.752 | 0.217 | 31.3  |
| 50 | FGES          | 500 | DD | 1     | 0.944 | 0.526 | 0.859 | 0.255 | 25.6  |
| 50 | FGES          | 500 | DD | 1.5   | 0.944 | 0.528 | 0.859 | 0.255 | 25.55 |
| 50 | FGES          | 500 | DD | 2     | 0.944 | 0.528 | 0.86  | 0.258 | 25.5  |
| 50 | FGES          | 500 | DD | 3     | 0.944 | 0.533 | 0.856 | 0.262 | 25.45 |
| 50 | FGES          | 500 | DD | 4     | 0.941 | 0.538 | 0.835 | 0.262 | 25.55 |
| 50 | FGES          | 500 | DD | 5     | 0.941 | 0.54  | 0.826 | 0.265 | 25.55 |
| 50 | MGM-PCMax     | 100 | DD | 1e-04 | 0.972 | 0.133 | 0.375 | 0.006 | 45.4  |
| 50 | MGM-PCMax     | 100 | DD | 0.001 | 0.978 | 0.148 | 0.354 | 0.019 | 45.1  |
| 50 | MGM-PCMax     | 100 | DD | 0.01  | 0.932 | 0.161 | 0.3   | 0.02  | 45.4  |



EVALUATION OF CAUSAL STRUCTURE LEARNING

|     |               |     |     |       |       |       |       |       |        |
|-----|---------------|-----|-----|-------|-------|-------|-------|-------|--------|
| 50  | MGM-PCMax     | 100 | DD  | 0.03  | 0.915 | 0.161 | 0.338 | 0.027 | 45.4   |
| 50  | MGM-PCMax     | 100 | DD  | 0.05  | 0.915 | 0.161 | 0.351 | 0.027 | 45.35  |
| 50  | MGM-PCMax     | 100 | DD  | 0.08  | 0.915 | 0.161 | 0.351 | 0.027 | 45.35  |
| 50  | MGM-PCMax     | 300 | DD  | 1e-04 | 0.982 | 0.28  | 0.274 | 0.045 | 38.95  |
| 50  | MGM-PCMax     | 300 | DD  | 0.001 | 0.976 | 0.289 | 0.236 | 0.045 | 39.15  |
| 50  | MGM-PCMax     | 300 | DD  | 0.01  | 0.976 | 0.294 | 0.222 | 0.045 | 39.15  |
| 50  | MGM-PCMax     | 300 | DD  | 0.03  | 0.976 | 0.296 | 0.263 | 0.047 | 39.05  |
| 50  | MGM-PCMax     | 300 | DD  | 0.05  | 0.976 | 0.296 | 0.289 | 0.049 | 38.95  |
| 50  | MGM-PCMax     | 300 | DD  | 0.08  | 0.969 | 0.296 | 0.281 | 0.049 | 39.05  |
| 50  | MGM-PCMax     | 500 | DD  | 1e-04 | 0.985 | 0.317 | 0.222 | 0.053 | 34.25  |
| 50  | MGM-PCMax     | 500 | DD  | 0.001 | 0.985 | 0.317 | 0.222 | 0.053 | 34.3   |
| 50  | MGM-PCMax     | 500 | DD  | 0.01  | 0.985 | 0.317 | 0.222 | 0.053 | 34.3   |
| 50  | MGM-PCMax     | 500 | DD  | 0.03  | 0.985 | 0.317 | 0.222 | 0.053 | 34.3   |
| 50  | MGM-PCMax     | 500 | DD  | 0.05  | 0.985 | 0.317 | 0.222 | 0.053 | 34.3   |
| 50  | MGM-PCMax     | 500 | DD  | 0.08  | 0.985 | 0.317 | 0.222 | 0.053 | 34.3   |
| 100 | Copula-PC     | 300 | All | 1e-04 | 0.902 | 0.203 | 0.994 | 0.045 | 316.35 |
| 100 | Copula-PC     | 300 | All | 0.001 | 0.814 | 0.236 | 0.969 | 0.057 | 319.75 |
| 100 | Copula-PC     | 300 | All | 0.01  | 0.585 | 0.282 | 0.853 | 0.072 | 359.3  |
| 100 | Copula-PC     | 300 | All | 0.03  | 0.425 | 0.311 | 0.678 | 0.083 | 428.8  |
| 100 | Copula-PC     | 300 | All | 0.05  | 0.36  | 0.33  | 0.536 | 0.093 | 481.8  |
| 100 | Copula-PC     | 300 | All | 0.08  | 0.3   | 0.349 | 0.41  | 0.109 | 556    |
| 100 | Copula-PC     | 500 | All | 1e-04 | 0.789 | 0.29  | 0.83  | 0.058 | 290.65 |
| 100 | Copula-PC     | 500 | All | 0.001 | 0.655 | 0.32  | 0.657 | 0.068 | 313.25 |
| 100 | Copula-PC     | 500 | All | 0.01  | 0.458 | 0.362 | 0.516 | 0.09  | 385.85 |
| 100 | Copula-PC     | 500 | All | 0.03  | 0.35  | 0.396 | 0.368 | 0.109 | 473.3  |
| 100 | Copula-PC     | 500 | All | 0.05  | 0.297 | 0.412 | 0.321 | 0.136 | 541.4  |
| 100 | Copula-PC     | 500 | All | 0.08  | 0.256 | 0.427 | 0.268 | 0.156 | 621.85 |
| 100 | MGM-CPCStable | 100 | All | 1e-04 | 0.951 | 0.12  | 0.938 | 0.007 | 381.65 |
| 100 | MGM-CPCStable | 100 | All | 0.001 | 0.902 | 0.139 | 0.969 | 0.012 | 380.15 |
| 100 | MGM-CPCStable | 100 | All | 0.01  | 0.858 | 0.157 | 0.977 | 0.019 | 379.2  |
| 100 | MGM-CPCStable | 100 | All | 0.03  | 0.843 | 0.162 | 0.958 | 0.024 | 379.15 |
| 100 | MGM-CPCStable | 100 | All | 0.05  | 0.834 | 0.165 | 0.903 | 0.025 | 379.45 |
| 100 | MGM-CPCStable | 100 | All | 0.08  | 0.829 | 0.166 | 0.934 | 0.027 | 379.55 |
| 100 | MGM-CPCStable | 300 | All | 1e-04 | 0.982 | 0.244 | 0.995 | 0.039 | 304.65 |
| 100 | MGM-CPCStable | 300 | All | 0.001 | 0.975 | 0.263 | 0.988 | 0.05  | 299.9  |
| 100 | MGM-CPCStable | 300 | All | 0.01  | 0.969 | 0.276 | 0.988 | 0.06  | 296.85 |
| 100 | MGM-CPCStable | 300 | All | 0.03  | 0.967 | 0.278 | 0.978 | 0.064 | 296.2  |
| 100 | MGM-CPCStable | 300 | All | 0.05  | 0.963 | 0.278 | 0.953 | 0.066 | 296.3  |
| 100 | MGM-CPCStable | 300 | All | 0.08  | 0.96  | 0.279 | 0.952 | 0.069 | 296    |
| 100 | MGM-CPCStable | 500 | All | 1e-04 | 0.99  | 0.308 | 0.98  | 0.046 | 266.75 |
| 100 | MGM-CPCStable | 500 | All | 0.001 | 0.991 | 0.317 | 0.973 | 0.05  | 264.7  |
| 100 | MGM-CPCStable | 500 | All | 0.01  | 0.988 | 0.321 | 0.982 | 0.056 | 263.4  |
| 100 | MGM-CPCStable | 500 | All | 0.03  | 0.983 | 0.323 | 0.978 | 0.063 | 262.4  |
| 100 | MGM-CPCStable | 500 | All | 0.05  | 0.983 | 0.323 | 0.973 | 0.064 | 262.3  |
| 100 | MGM-CPCStable | 500 | All | 0.08  | 0.981 | 0.323 | 0.965 | 0.068 | 261.85 |

|     |              |     |     |       |       |       |       |       |        |
|-----|--------------|-----|-----|-------|-------|-------|-------|-------|--------|
| 100 | MGM-PCStable | 100 | All | 1e-04 | 0.951 | 0.12  | 0.428 | 0.029 | 384.15 |
| 100 | MGM-PCStable | 100 | All | 0.001 | 0.902 | 0.139 | 0.391 | 0.042 | 385.1  |
| 100 | MGM-PCStable | 100 | All | 0.01  | 0.858 | 0.157 | 0.39  | 0.062 | 385.75 |
| 100 | MGM-PCStable | 100 | All | 0.03  | 0.843 | 0.162 | 0.38  | 0.068 | 387    |
| 100 | MGM-PCStable | 100 | All | 0.05  | 0.834 | 0.165 | 0.372 | 0.071 | 387.6  |
| 100 | MGM-PCStable | 100 | All | 0.08  | 0.829 | 0.166 | 0.373 | 0.073 | 387.85 |
| 100 | MGM-PCStable | 300 | All | 1e-04 | 0.982 | 0.244 | 0.439 | 0.117 | 316    |
| 100 | MGM-PCStable | 300 | All | 0.001 | 0.975 | 0.263 | 0.435 | 0.136 | 314    |
| 100 | MGM-PCStable | 300 | All | 0.01  | 0.969 | 0.276 | 0.431 | 0.148 | 313.05 |
| 100 | MGM-PCStable | 300 | All | 0.03  | 0.967 | 0.278 | 0.429 | 0.149 | 313    |
| 100 | MGM-PCStable | 300 | All | 0.05  | 0.963 | 0.278 | 0.426 | 0.149 | 313.4  |
| 100 | MGM-PCStable | 300 | All | 0.08  | 0.96  | 0.279 | 0.424 | 0.149 | 313.65 |
| 100 | MGM-PCStable | 500 | All | 1e-04 | 0.99  | 0.308 | 0.427 | 0.142 | 280.15 |
| 100 | MGM-PCStable | 500 | All | 0.001 | 0.991 | 0.317 | 0.43  | 0.15  | 278.75 |
| 100 | MGM-PCStable | 500 | All | 0.01  | 0.988 | 0.321 | 0.432 | 0.155 | 278.45 |
| 100 | MGM-PCStable | 500 | All | 0.03  | 0.983 | 0.323 | 0.429 | 0.157 | 278.6  |
| 100 | MGM-PCStable | 500 | All | 0.05  | 0.983 | 0.323 | 0.429 | 0.157 | 278.6  |
| 100 | MGM-PCStable | 500 | All | 0.08  | 0.981 | 0.323 | 0.427 | 0.156 | 278.9  |
| 100 | FGES         | 100 | All | 1     | 0.683 | 0.224 | 0.542 | 0.09  | 387    |
| 100 | FGES         | 100 | All | 1.5   | 0.662 | 0.231 | 0.509 | 0.097 | 390.35 |
| 100 | FGES         | 100 | All | 2     | 0.636 | 0.232 | 0.477 | 0.103 | 395.75 |
| 100 | FGES         | 100 | All | 3     | 0.609 | 0.237 | 0.46  | 0.116 | 400.8  |
| 100 | FGES         | 100 | All | 4     | 0.595 | 0.24  | 0.444 | 0.121 | 404.25 |
| 100 | FGES         | 100 | All | 5     | 0.579 | 0.244 | 0.427 | 0.129 | 408.25 |
| 100 | FGES         | 300 | All | 1     | 0.854 | 0.41  | 0.75  | 0.227 | 271.6  |
| 100 | FGES         | 300 | All | 1.5   | 0.842 | 0.412 | 0.726 | 0.235 | 272.85 |
| 100 | FGES         | 300 | All | 2     | 0.836 | 0.416 | 0.726 | 0.239 | 272.95 |
| 100 | FGES         | 300 | All | 3     | 0.821 | 0.421 | 0.702 | 0.255 | 273.9  |
| 100 | FGES         | 300 | All | 4     | 0.813 | 0.425 | 0.692 | 0.261 | 274.6  |
| 100 | FGES         | 300 | All | 5     | 0.805 | 0.429 | 0.684 | 0.266 | 275.8  |
| 100 | FGES         | 500 | All | 1     | 0.915 | 0.501 | 0.833 | 0.269 | 219.4  |
| 100 | FGES         | 500 | All | 1.5   | 0.907 | 0.506 | 0.826 | 0.274 | 219.75 |
| 100 | FGES         | 500 | All | 2     | 0.898 | 0.509 | 0.809 | 0.281 | 220.8  |
| 100 | FGES         | 500 | All | 3     | 0.885 | 0.514 | 0.787 | 0.29  | 221.65 |
| 100 | FGES         | 500 | All | 4     | 0.877 | 0.517 | 0.774 | 0.297 | 222.35 |
| 100 | FGES         | 500 | All | 5     | 0.874 | 0.521 | 0.771 | 0.3   | 222.15 |
| 100 | MGM-PCMax    | 100 | All | 1e-04 | 0.935 | 0.123 | 0.278 | 0.011 | 386.55 |
| 100 | MGM-PCMax    | 100 | All | 0.001 | 0.894 | 0.142 | 0.267 | 0.017 | 387.3  |
| 100 | MGM-PCMax    | 100 | All | 0.01  | 0.856 | 0.158 | 0.301 | 0.028 | 387.75 |
| 100 | MGM-PCMax    | 100 | All | 0.03  | 0.84  | 0.163 | 0.285 | 0.029 | 389.55 |
| 100 | MGM-PCMax    | 100 | All | 0.05  | 0.833 | 0.166 | 0.292 | 0.032 | 389.85 |
| 100 | MGM-PCMax    | 100 | All | 0.08  | 0.83  | 0.166 | 0.287 | 0.031 | 390.25 |
| 100 | MGM-PCMax    | 300 | All | 1e-04 | 0.981 | 0.245 | 0.281 | 0.044 | 322.4  |
| 100 | MGM-PCMax    | 300 | All | 0.001 | 0.976 | 0.264 | 0.286 | 0.053 | 321.1  |
| 100 | MGM-PCMax    | 300 | All | 0.01  | 0.971 | 0.276 | 0.3   | 0.061 | 319.45 |

EVALUATION OF CAUSAL STRUCTURE LEARNING

|     |               |     |     |       |       |       |       |       |        |
|-----|---------------|-----|-----|-------|-------|-------|-------|-------|--------|
| 100 | MGM-PCMax     | 300 | All | 0.03  | 0.966 | 0.278 | 0.31  | 0.065 | 319.05 |
| 100 | MGM-PCMax     | 300 | All | 0.05  | 0.962 | 0.278 | 0.308 | 0.064 | 319.4  |
| 100 | MGM-PCMax     | 300 | All | 0.08  | 0.959 | 0.279 | 0.307 | 0.065 | 319.65 |
| 100 | MGM-PCMax     | 500 | All | 1e-04 | 0.991 | 0.308 | 0.3   | 0.06  | 285.6  |
| 100 | MGM-PCMax     | 500 | All | 0.001 | 0.992 | 0.317 | 0.324 | 0.067 | 283.3  |
| 100 | MGM-PCMax     | 500 | All | 0.01  | 0.989 | 0.321 | 0.32  | 0.068 | 283.45 |
| 100 | MGM-PCMax     | 500 | All | 0.03  | 0.985 | 0.323 | 0.322 | 0.07  | 283.4  |
| 100 | MGM-PCMax     | 500 | All | 0.05  | 0.985 | 0.323 | 0.322 | 0.07  | 283.45 |
| 100 | MGM-PCMax     | 500 | All | 0.08  | 0.982 | 0.323 | 0.322 | 0.071 | 283.65 |
| 100 | Copula-PC     | 300 | CC  | 1e-04 | 0.918 | 0.297 | 1     | 0.078 | 70.5   |
| 100 | Copula-PC     | 300 | CC  | 0.001 | 0.853 | 0.332 | 0.938 | 0.097 | 70.5   |
| 100 | Copula-PC     | 300 | CC  | 0.01  | 0.653 | 0.368 | 0.915 | 0.114 | 77.8   |
| 100 | Copula-PC     | 300 | CC  | 0.03  | 0.49  | 0.392 | 0.759 | 0.139 | 94.3   |
| 100 | Copula-PC     | 300 | CC  | 0.05  | 0.435 | 0.416 | 0.589 | 0.157 | 105.35 |
| 100 | Copula-PC     | 300 | CC  | 0.08  | 0.375 | 0.433 | 0.476 | 0.172 | 120.25 |
| 100 | Copula-PC     | 500 | CC  | 1e-04 | 0.878 | 0.423 | 0.905 | 0.105 | 62.85  |
| 100 | Copula-PC     | 500 | CC  | 0.001 | 0.804 | 0.448 | 0.823 | 0.112 | 65.35  |
| 100 | Copula-PC     | 500 | CC  | 0.01  | 0.644 | 0.481 | 0.722 | 0.132 | 76.9   |
| 100 | Copula-PC     | 500 | CC  | 0.03  | 0.538 | 0.518 | 0.602 | 0.169 | 90.3   |
| 100 | Copula-PC     | 500 | CC  | 0.05  | 0.479 | 0.533 | 0.543 | 0.207 | 101.2  |
| 100 | Copula-PC     | 500 | CC  | 0.08  | 0.417 | 0.553 | 0.459 | 0.225 | 118.65 |
| 100 | MGM-CPCStable | 100 | CC  | 1e-04 | 0.983 | 0.143 | 1     | 0.009 | 92.85  |
| 100 | MGM-CPCStable | 100 | CC  | 0.001 | 0.93  | 0.17  | 1     | 0.011 | 92.4   |
| 100 | MGM-CPCStable | 100 | CC  | 0.01  | 0.879 | 0.19  | 1     | 0.017 | 92.3   |
| 100 | MGM-CPCStable | 100 | CC  | 0.03  | 0.861 | 0.194 | 1     | 0.018 | 92.65  |
| 100 | MGM-CPCStable | 100 | CC  | 0.05  | 0.841 | 0.198 | 0.972 | 0.021 | 92.95  |
| 100 | MGM-CPCStable | 100 | CC  | 0.08  | 0.846 | 0.2   | 1     | 0.019 | 92.9   |
| 100 | MGM-CPCStable | 300 | CC  | 1e-04 | 0.975 | 0.33  | 1     | 0.062 | 68.8   |
| 100 | MGM-CPCStable | 300 | CC  | 0.001 | 0.974 | 0.357 | 0.932 | 0.081 | 66.95  |
| 100 | MGM-CPCStable | 300 | CC  | 0.01  | 0.972 | 0.37  | 0.967 | 0.098 | 65.75  |
| 100 | MGM-CPCStable | 300 | CC  | 0.03  | 0.972 | 0.374 | 0.975 | 0.104 | 65.35  |
| 100 | MGM-CPCStable | 300 | CC  | 0.05  | 0.969 | 0.374 | 0.964 | 0.104 | 65.5   |
| 100 | MGM-CPCStable | 300 | CC  | 0.08  | 0.969 | 0.377 | 0.93  | 0.107 | 65.4   |
| 100 | MGM-CPCStable | 500 | CC  | 1e-04 | 0.992 | 0.439 | 0.978 | 0.086 | 59.6   |
| 100 | MGM-CPCStable | 500 | CC  | 0.001 | 0.992 | 0.448 | 0.985 | 0.094 | 58.8   |
| 100 | MGM-CPCStable | 500 | CC  | 0.01  | 0.992 | 0.453 | 0.984 | 0.101 | 58.4   |
| 100 | MGM-CPCStable | 500 | CC  | 0.03  | 0.988 | 0.458 | 0.984 | 0.115 | 57.8   |
| 100 | MGM-CPCStable | 500 | CC  | 0.05  | 0.988 | 0.458 | 0.974 | 0.114 | 57.85  |
| 100 | MGM-CPCStable | 500 | CC  | 0.08  | 0.984 | 0.458 | 0.976 | 0.122 | 57.7   |
| 100 | MGM-PCStable  | 100 | CC  | 1e-04 | 0.983 | 0.143 | 0.409 | 0.033 | 93.8   |
| 100 | MGM-PCStable  | 100 | CC  | 0.001 | 0.93  | 0.17  | 0.373 | 0.054 | 94.05  |
| 100 | MGM-PCStable  | 100 | CC  | 0.01  | 0.879 | 0.19  | 0.374 | 0.068 | 94.45  |
| 100 | MGM-PCStable  | 100 | CC  | 0.03  | 0.861 | 0.194 | 0.361 | 0.072 | 95.2   |
| 100 | MGM-PCStable  | 100 | CC  | 0.05  | 0.841 | 0.198 | 0.343 | 0.079 | 95.5   |
| 100 | MGM-PCStable  | 100 | CC  | 0.08  | 0.846 | 0.2   | 0.35  | 0.084 | 95.4   |

|     |              |     |    |       |       |       |       |       |        |
|-----|--------------|-----|----|-------|-------|-------|-------|-------|--------|
| 100 | MGM-PCStable | 300 | CC | 1e-04 | 0.975 | 0.33  | 0.397 | 0.155 | 73.1   |
| 100 | MGM-PCStable | 300 | CC | 0.001 | 0.974 | 0.357 | 0.388 | 0.177 | 72.4   |
| 100 | MGM-PCStable | 300 | CC | 0.01  | 0.972 | 0.37  | 0.388 | 0.192 | 71.95  |
| 100 | MGM-PCStable | 300 | CC | 0.03  | 0.972 | 0.374 | 0.384 | 0.194 | 71.85  |
| 100 | MGM-PCStable | 300 | CC | 0.05  | 0.969 | 0.374 | 0.384 | 0.194 | 71.95  |
| 100 | MGM-PCStable | 300 | CC | 0.08  | 0.969 | 0.377 | 0.386 | 0.196 | 71.85  |
| 100 | MGM-PCStable | 500 | CC | 1e-04 | 0.992 | 0.439 | 0.451 | 0.241 | 64.8   |
| 100 | MGM-PCStable | 500 | CC | 0.001 | 0.992 | 0.448 | 0.456 | 0.253 | 64.2   |
| 100 | MGM-PCStable | 500 | CC | 0.01  | 0.992 | 0.453 | 0.458 | 0.26  | 64     |
| 100 | MGM-PCStable | 500 | CC | 0.03  | 0.988 | 0.458 | 0.459 | 0.265 | 63.95  |
| 100 | MGM-PCStable | 500 | CC | 0.05  | 0.988 | 0.458 | 0.459 | 0.265 | 63.95  |
| 100 | MGM-PCStable | 500 | CC | 0.08  | 0.984 | 0.458 | 0.457 | 0.262 | 64.25  |
| 100 | FGES         | 100 | CC | 1     | 0.698 | 0.259 | 0.518 | 0.097 | 94.4   |
| 100 | FGES         | 100 | CC | 1.5   | 0.675 | 0.267 | 0.457 | 0.101 | 95.7   |
| 100 | FGES         | 100 | CC | 2     | 0.65  | 0.271 | 0.418 | 0.105 | 97.3   |
| 100 | FGES         | 100 | CC | 3     | 0.615 | 0.274 | 0.41  | 0.117 | 99.4   |
| 100 | FGES         | 100 | CC | 4     | 0.596 | 0.279 | 0.403 | 0.127 | 100.6  |
| 100 | FGES         | 100 | CC | 5     | 0.581 | 0.281 | 0.391 | 0.136 | 101.65 |
| 100 | FGES         | 300 | CC | 1     | 0.874 | 0.492 | 0.776 | 0.299 | 59     |
| 100 | FGES         | 300 | CC | 1.5   | 0.864 | 0.494 | 0.756 | 0.309 | 59.15  |
| 100 | FGES         | 300 | CC | 2     | 0.862 | 0.498 | 0.765 | 0.314 | 58.85  |
| 100 | FGES         | 300 | CC | 3     | 0.844 | 0.503 | 0.741 | 0.331 | 59.3   |
| 100 | FGES         | 300 | CC | 4     | 0.838 | 0.509 | 0.73  | 0.336 | 59.55  |
| 100 | FGES         | 300 | CC | 5     | 0.828 | 0.509 | 0.717 | 0.338 | 60.1   |
| 100 | FGES         | 500 | CC | 1     | 0.925 | 0.587 | 0.862 | 0.357 | 47.5   |
| 100 | FGES         | 500 | CC | 1.5   | 0.917 | 0.594 | 0.856 | 0.363 | 47.6   |
| 100 | FGES         | 500 | CC | 2     | 0.9   | 0.597 | 0.847 | 0.37  | 48.05  |
| 100 | FGES         | 500 | CC | 3     | 0.884 | 0.602 | 0.824 | 0.386 | 48.2   |
| 100 | FGES         | 500 | CC | 4     | 0.881 | 0.608 | 0.817 | 0.393 | 48.25  |
| 100 | FGES         | 500 | CC | 5     | 0.874 | 0.612 | 0.811 | 0.397 | 48.45  |
| 100 | MGM-PCMax    | 100 | CC | 1e-04 | 0.972 | 0.145 | 0.245 | 0.013 | 94.35  |
| 100 | MGM-PCMax    | 100 | CC | 0.001 | 0.918 | 0.171 | 0.268 | 0.025 | 94.55  |
| 100 | MGM-PCMax    | 100 | CC | 0.01  | 0.87  | 0.19  | 0.302 | 0.038 | 94.85  |
| 100 | MGM-PCMax    | 100 | CC | 0.03  | 0.854 | 0.194 | 0.271 | 0.037 | 95.95  |
| 100 | MGM-PCMax    | 100 | CC | 0.05  | 0.839 | 0.198 | 0.282 | 0.044 | 96.05  |
| 100 | MGM-PCMax    | 100 | CC | 0.08  | 0.84  | 0.2   | 0.271 | 0.041 | 96.1   |
| 100 | MGM-PCMax    | 300 | CC | 1e-04 | 0.975 | 0.33  | 0.291 | 0.066 | 74.55  |
| 100 | MGM-PCMax    | 300 | CC | 0.001 | 0.973 | 0.357 | 0.249 | 0.075 | 74.5   |
| 100 | MGM-PCMax    | 300 | CC | 0.01  | 0.972 | 0.37  | 0.246 | 0.08  | 73.95  |
| 100 | MGM-PCMax    | 300 | CC | 0.03  | 0.969 | 0.374 | 0.261 | 0.087 | 73.55  |
| 100 | MGM-PCMax    | 300 | CC | 0.05  | 0.966 | 0.374 | 0.25  | 0.085 | 73.75  |
| 100 | MGM-PCMax    | 300 | CC | 0.08  | 0.969 | 0.377 | 0.251 | 0.085 | 73.7   |
| 100 | MGM-PCMax    | 500 | CC | 1e-04 | 0.995 | 0.44  | 0.317 | 0.113 | 66.85  |
| 100 | MGM-PCMax    | 500 | CC | 0.001 | 0.995 | 0.448 | 0.346 | 0.123 | 66     |
| 100 | MGM-PCMax    | 500 | CC | 0.01  | 0.995 | 0.453 | 0.343 | 0.121 | 66     |

EVALUATION OF CAUSAL STRUCTURE LEARNING

|     |               |     |    |       |       |       |       |       |        |
|-----|---------------|-----|----|-------|-------|-------|-------|-------|--------|
| 100 | MGM-PCMax     | 500 | CC | 0.03  | 0.991 | 0.458 | 0.341 | 0.125 | 66     |
| 100 | MGM-PCMax     | 500 | CC | 0.05  | 0.991 | 0.458 | 0.346 | 0.126 | 65.9   |
| 100 | MGM-PCMax     | 500 | CC | 0.08  | 0.987 | 0.458 | 0.345 | 0.126 | 66.1   |
| 100 | Copula-PC     | 300 | CD | 1e-04 | 0.859 | 0.159 | 0.983 | 0.029 | 164.4  |
| 100 | Copula-PC     | 300 | CD | 0.001 | 0.766 | 0.19  | 0.902 | 0.039 | 166.35 |
| 100 | Copula-PC     | 300 | CD | 0.01  | 0.523 | 0.232 | 0.663 | 0.049 | 189    |
| 100 | Copula-PC     | 300 | CD | 0.03  | 0.383 | 0.267 | 0.54  | 0.057 | 224.2  |
| 100 | Copula-PC     | 300 | CD | 0.05  | 0.321 | 0.285 | 0.414 | 0.065 | 253.35 |
| 100 | Copula-PC     | 300 | CD | 0.08  | 0.265 | 0.304 | 0.322 | 0.08  | 295.65 |
| 100 | Copula-PC     | 500 | CD | 1e-04 | 0.773 | 0.228 | 0.779 | 0.045 | 146.5  |
| 100 | Copula-PC     | 500 | CD | 0.001 | 0.619 | 0.256 | 0.628 | 0.055 | 156.35 |
| 100 | Copula-PC     | 500 | CD | 0.01  | 0.416 | 0.299 | 0.485 | 0.075 | 190.75 |
| 100 | Copula-PC     | 500 | CD | 0.03  | 0.307 | 0.33  | 0.322 | 0.086 | 234.55 |
| 100 | Copula-PC     | 500 | CD | 0.05  | 0.254 | 0.344 | 0.279 | 0.106 | 271.95 |
| 100 | Copula-PC     | 500 | CD | 0.08  | 0.22  | 0.359 | 0.236 | 0.129 | 310.2  |
| 100 | MGM-CPCStable | 100 | CD | 1e-04 | 0.924 | 0.111 | 0.833 | 0.004 | 194.05 |
| 100 | MGM-CPCStable | 100 | CD | 0.001 | 0.875 | 0.128 | 0.929 | 0.011 | 193.4  |
| 100 | MGM-CPCStable | 100 | CD | 0.01  | 0.825 | 0.145 | 0.944 | 0.017 | 193.2  |
| 100 | MGM-CPCStable | 100 | CD | 0.03  | 0.818 | 0.15  | 0.937 | 0.024 | 192.7  |
| 100 | MGM-CPCStable | 100 | CD | 0.05  | 0.814 | 0.154 | 0.877 | 0.026 | 192.65 |
| 100 | MGM-CPCStable | 100 | CD | 0.08  | 0.808 | 0.154 | 0.945 | 0.026 | 192.75 |
| 100 | MGM-CPCStable | 300 | CD | 1e-04 | 0.981 | 0.195 | 0.987 | 0.027 | 158.5  |
| 100 | MGM-CPCStable | 300 | CD | 0.001 | 0.965 | 0.212 | 0.987 | 0.034 | 156.85 |
| 100 | MGM-CPCStable | 300 | CD | 0.01  | 0.956 | 0.222 | 0.979 | 0.041 | 155.8  |
| 100 | MGM-CPCStable | 300 | CD | 0.03  | 0.953 | 0.223 | 0.968 | 0.044 | 155.65 |
| 100 | MGM-CPCStable | 300 | CD | 0.05  | 0.946 | 0.224 | 0.957 | 0.046 | 155.75 |
| 100 | MGM-CPCStable | 300 | CD | 0.08  | 0.944 | 0.225 | 0.965 | 0.048 | 155.55 |
| 100 | MGM-CPCStable | 500 | CD | 1e-04 | 0.995 | 0.243 | 1     | 0.034 | 137.3  |
| 100 | MGM-CPCStable | 500 | CD | 0.001 | 0.996 | 0.248 | 0.933 | 0.037 | 136.7  |
| 100 | MGM-CPCStable | 500 | CD | 0.01  | 0.993 | 0.253 | 0.938 | 0.043 | 135.85 |
| 100 | MGM-CPCStable | 500 | CD | 0.03  | 0.991 | 0.254 | 0.933 | 0.049 | 135.55 |
| 100 | MGM-CPCStable | 500 | CD | 0.05  | 0.991 | 0.254 | 0.933 | 0.049 | 135.45 |
| 100 | MGM-CPCStable | 500 | CD | 0.08  | 0.991 | 0.254 | 0.922 | 0.053 | 135.25 |
| 100 | MGM-PCStable  | 100 | CD | 1e-04 | 0.924 | 0.111 | 0.342 | 0.025 | 195.5  |
| 100 | MGM-PCStable  | 100 | CD | 0.001 | 0.875 | 0.128 | 0.35  | 0.036 | 195.9  |
| 100 | MGM-PCStable  | 100 | CD | 0.01  | 0.825 | 0.145 | 0.362 | 0.057 | 196.3  |
| 100 | MGM-PCStable  | 100 | CD | 0.03  | 0.818 | 0.15  | 0.375 | 0.065 | 196.35 |
| 100 | MGM-PCStable  | 100 | CD | 0.05  | 0.814 | 0.154 | 0.365 | 0.067 | 196.55 |
| 100 | MGM-PCStable  | 100 | CD | 0.08  | 0.808 | 0.154 | 0.366 | 0.069 | 196.7  |
| 100 | MGM-PCStable  | 300 | CD | 1e-04 | 0.981 | 0.195 | 0.451 | 0.096 | 162.3  |
| 100 | MGM-PCStable  | 300 | CD | 0.001 | 0.965 | 0.212 | 0.433 | 0.112 | 161.75 |
| 100 | MGM-PCStable  | 300 | CD | 0.01  | 0.956 | 0.222 | 0.432 | 0.122 | 161.3  |
| 100 | MGM-PCStable  | 300 | CD | 0.03  | 0.953 | 0.223 | 0.43  | 0.122 | 161.45 |
| 100 | MGM-PCStable  | 300 | CD | 0.05  | 0.946 | 0.224 | 0.423 | 0.122 | 161.75 |
| 100 | MGM-PCStable  | 300 | CD | 0.08  | 0.944 | 0.225 | 0.423 | 0.123 | 161.8  |

|     |              |     |    |       |       |       |       |       |        |
|-----|--------------|-----|----|-------|-------|-------|-------|-------|--------|
| 100 | MGM-PCStable | 500 | CD | 1e-04 | 0.995 | 0.243 | 0.407 | 0.108 | 142.5  |
| 100 | MGM-PCStable | 500 | CD | 0.001 | 0.996 | 0.248 | 0.415 | 0.117 | 141.85 |
| 100 | MGM-PCStable | 500 | CD | 0.01  | 0.993 | 0.253 | 0.418 | 0.122 | 141.65 |
| 100 | MGM-PCStable | 500 | CD | 0.03  | 0.991 | 0.254 | 0.414 | 0.122 | 141.75 |
| 100 | MGM-PCStable | 500 | CD | 0.05  | 0.991 | 0.254 | 0.414 | 0.122 | 141.75 |
| 100 | MGM-PCStable | 500 | CD | 0.08  | 0.991 | 0.254 | 0.414 | 0.122 | 141.75 |
| 100 | FGES         | 100 | CD | 1     | 0.665 | 0.216 | 0.533 | 0.087 | 197    |
| 100 | FGES         | 100 | CD | 1.5   | 0.65  | 0.221 | 0.522 | 0.095 | 198.05 |
| 100 | FGES         | 100 | CD | 2     | 0.623 | 0.222 | 0.484 | 0.101 | 200.95 |
| 100 | FGES         | 100 | CD | 3     | 0.602 | 0.226 | 0.466 | 0.114 | 202.75 |
| 100 | FGES         | 100 | CD | 4     | 0.589 | 0.23  | 0.442 | 0.118 | 204.5  |
| 100 | FGES         | 100 | CD | 5     | 0.575 | 0.232 | 0.422 | 0.125 | 206.35 |
| 100 | FGES         | 300 | CD | 1     | 0.825 | 0.374 | 0.719 | 0.198 | 144.1  |
| 100 | FGES         | 300 | CD | 1.5   | 0.812 | 0.377 | 0.689 | 0.205 | 145    |
| 100 | FGES         | 300 | CD | 2     | 0.803 | 0.382 | 0.683 | 0.21  | 145.3  |
| 100 | FGES         | 300 | CD | 3     | 0.791 | 0.389 | 0.664 | 0.226 | 145.3  |
| 100 | FGES         | 300 | CD | 4     | 0.782 | 0.391 | 0.655 | 0.234 | 145.8  |
| 100 | FGES         | 300 | CD | 5     | 0.773 | 0.396 | 0.648 | 0.24  | 146.45 |
| 100 | FGES         | 500 | CD | 1     | 0.895 | 0.463 | 0.803 | 0.234 | 115.15 |
| 100 | FGES         | 500 | CD | 1.5   | 0.885 | 0.466 | 0.795 | 0.24  | 115.4  |
| 100 | FGES         | 500 | CD | 2     | 0.877 | 0.469 | 0.777 | 0.248 | 115.7  |
| 100 | FGES         | 500 | CD | 3     | 0.862 | 0.476 | 0.755 | 0.256 | 116.7  |
| 100 | FGES         | 500 | CD | 4     | 0.848 | 0.478 | 0.734 | 0.263 | 117.45 |
| 100 | FGES         | 500 | CD | 5     | 0.848 | 0.482 | 0.732 | 0.265 | 117.2  |
| 100 | MGM-PCMax    | 100 | CD | 1e-04 | 0.912 | 0.115 | 0.237 | 0.01  | 196.25 |
| 100 | MGM-PCMax    | 100 | CD | 0.001 | 0.869 | 0.131 | 0.218 | 0.013 | 196.95 |
| 100 | MGM-PCMax    | 100 | CD | 0.01  | 0.825 | 0.145 | 0.265 | 0.024 | 197.1  |
| 100 | MGM-PCMax    | 100 | CD | 0.03  | 0.817 | 0.151 | 0.28  | 0.026 | 197.5  |
| 100 | MGM-PCMax    | 100 | CD | 0.05  | 0.814 | 0.154 | 0.283 | 0.028 | 197.65 |
| 100 | MGM-PCMax    | 100 | CD | 0.08  | 0.81  | 0.154 | 0.287 | 0.028 | 197.7  |
| 100 | MGM-PCMax    | 300 | CD | 1e-04 | 0.979 | 0.197 | 0.281 | 0.035 | 165.5  |
| 100 | MGM-PCMax    | 300 | CD | 0.001 | 0.965 | 0.212 | 0.301 | 0.043 | 164.75 |
| 100 | MGM-PCMax    | 300 | CD | 0.01  | 0.958 | 0.222 | 0.319 | 0.049 | 164.3  |
| 100 | MGM-PCMax    | 300 | CD | 0.03  | 0.953 | 0.223 | 0.317 | 0.051 | 164.65 |
| 100 | MGM-PCMax    | 300 | CD | 0.05  | 0.946 | 0.224 | 0.312 | 0.05  | 164.9  |
| 100 | MGM-PCMax    | 300 | CD | 0.08  | 0.943 | 0.225 | 0.315 | 0.05  | 164.95 |
| 100 | MGM-PCMax    | 500 | CD | 1e-04 | 0.995 | 0.243 | 0.296 | 0.043 | 145.05 |
| 100 | MGM-PCMax    | 500 | CD | 0.001 | 0.996 | 0.248 | 0.311 | 0.048 | 144.2  |
| 100 | MGM-PCMax    | 500 | CD | 0.01  | 0.993 | 0.253 | 0.309 | 0.049 | 144.3  |
| 100 | MGM-PCMax    | 500 | CD | 0.03  | 0.991 | 0.254 | 0.306 | 0.05  | 144.35 |
| 100 | MGM-PCMax    | 500 | CD | 0.05  | 0.991 | 0.254 | 0.308 | 0.051 | 144.4  |
| 100 | MGM-PCMax    | 500 | CD | 0.08  | 0.991 | 0.254 | 0.31  | 0.051 | 144.3  |
| 100 | Copula-PC    | 300 | DD | 1e-04 | 0.885 | 0.204 | 1     | 0.042 | 81.45  |
| 100 | Copula-PC    | 300 | DD | 0.001 | 0.795 | 0.237 | 0.958 | 0.054 | 82.9   |
| 100 | Copula-PC    | 300 | DD | 0.01  | 0.588 | 0.301 | 0.747 | 0.072 | 92.5   |

EVALUATION OF CAUSAL STRUCTURE LEARNING

|     |               |     |    |       |       |       |       |       |        |
|-----|---------------|-----|----|-------|-------|-------|-------|-------|--------|
| 100 | Copula-PC     | 300 | DD | 0.03  | 0.43  | 0.323 | 0.572 | 0.079 | 110.3  |
| 100 | Copula-PC     | 300 | DD | 0.05  | 0.371 | 0.339 | 0.468 | 0.084 | 123.1  |
| 100 | Copula-PC     | 300 | DD | 0.08  | 0.314 | 0.359 | 0.387 | 0.104 | 140.1  |
| 100 | Copula-PC     | 500 | DD | 1e-04 | 0.709 | 0.284 | 0.648 | 0.038 | 81.3   |
| 100 | Copula-PC     | 500 | DD | 0.001 | 0.567 | 0.324 | 0.469 | 0.05  | 91.55  |
| 100 | Copula-PC     | 500 | DD | 0.01  | 0.389 | 0.371 | 0.381 | 0.075 | 118.2  |
| 100 | Copula-PC     | 500 | DD | 0.03  | 0.292 | 0.408 | 0.26  | 0.095 | 148.45 |
| 100 | Copula-PC     | 500 | DD | 0.05  | 0.253 | 0.43  | 0.231 | 0.122 | 168.25 |
| 100 | Copula-PC     | 500 | DD | 0.08  | 0.216 | 0.442 | 0.196 | 0.139 | 193    |
| 100 | MGM-CPCStable | 100 | DD | 1e-04 | 0.947 | 0.121 | 1     | 0.008 | 94.75  |
| 100 | MGM-CPCStable | 100 | DD | 0.001 | 0.889 | 0.136 | 1     | 0.016 | 94.35  |
| 100 | MGM-CPCStable | 100 | DD | 0.01  | 0.871 | 0.156 | 1     | 0.025 | 93.7   |
| 100 | MGM-CPCStable | 100 | DD | 0.03  | 0.851 | 0.161 | 0.932 | 0.028 | 93.8   |
| 100 | MGM-CPCStable | 100 | DD | 0.05  | 0.851 | 0.162 | 0.875 | 0.028 | 93.85  |
| 100 | MGM-CPCStable | 100 | DD | 0.08  | 0.844 | 0.162 | 0.865 | 0.035 | 93.9   |
| 100 | MGM-CPCStable | 300 | DD | 1e-04 | 0.989 | 0.262 | 1     | 0.04  | 77.35  |
| 100 | MGM-CPCStable | 300 | DD | 0.001 | 0.985 | 0.281 | 1     | 0.05  | 76.1   |
| 100 | MGM-CPCStable | 300 | DD | 0.01  | 0.982 | 0.294 | 1     | 0.059 | 75.3   |
| 100 | MGM-CPCStable | 300 | DD | 0.03  | 0.98  | 0.296 | 1     | 0.06  | 75.2   |
| 100 | MGM-CPCStable | 300 | DD | 0.05  | 0.98  | 0.296 | 0.94  | 0.064 | 75.05  |
| 100 | MGM-CPCStable | 300 | DD | 0.08  | 0.971 | 0.296 | 0.922 | 0.068 | 75.05  |
| 100 | MGM-CPCStable | 500 | DD | 1e-04 | 0.985 | 0.302 | 1     | 0.03  | 69.85  |
| 100 | MGM-CPCStable | 500 | DD | 0.001 | 0.985 | 0.318 | 1     | 0.033 | 69.2   |
| 100 | MGM-CPCStable | 500 | DD | 0.01  | 0.979 | 0.321 | 1     | 0.036 | 69.15  |
| 100 | MGM-CPCStable | 500 | DD | 0.03  | 0.972 | 0.323 | 1     | 0.042 | 69.05  |
| 100 | MGM-CPCStable | 500 | DD | 0.05  | 0.972 | 0.323 | 0.983 | 0.043 | 69     |
| 100 | MGM-CPCStable | 500 | DD | 0.08  | 0.972 | 0.325 | 0.912 | 0.045 | 68.9   |
| 100 | MGM-PCStable  | 100 | DD | 1e-04 | 0.947 | 0.121 | 0.494 | 0.036 | 94.85  |
| 100 | MGM-PCStable  | 100 | DD | 0.001 | 0.889 | 0.136 | 0.478 | 0.043 | 95.15  |
| 100 | MGM-PCStable  | 100 | DD | 0.01  | 0.871 | 0.156 | 0.488 | 0.066 | 95     |
| 100 | MGM-PCStable  | 100 | DD | 0.03  | 0.851 | 0.161 | 0.443 | 0.07  | 95.45  |
| 100 | MGM-PCStable  | 100 | DD | 0.05  | 0.851 | 0.162 | 0.436 | 0.071 | 95.55  |
| 100 | MGM-PCStable  | 100 | DD | 0.08  | 0.844 | 0.162 | 0.434 | 0.073 | 95.75  |
| 100 | MGM-PCStable  | 300 | DD | 1e-04 | 0.989 | 0.262 | 0.413 | 0.125 | 80.6   |
| 100 | MGM-PCStable  | 300 | DD | 0.001 | 0.985 | 0.281 | 0.435 | 0.147 | 79.85  |
| 100 | MGM-PCStable  | 300 | DD | 0.01  | 0.982 | 0.294 | 0.422 | 0.154 | 79.8   |
| 100 | MGM-PCStable  | 300 | DD | 0.03  | 0.98  | 0.296 | 0.421 | 0.156 | 79.7   |
| 100 | MGM-PCStable  | 300 | DD | 0.05  | 0.98  | 0.296 | 0.419 | 0.156 | 79.7   |
| 100 | MGM-PCStable  | 300 | DD | 0.08  | 0.971 | 0.296 | 0.414 | 0.155 | 80     |
| 100 | MGM-PCStable  | 500 | DD | 1e-04 | 0.985 | 0.302 | 0.372 | 0.109 | 72.85  |
| 100 | MGM-PCStable  | 500 | DD | 0.001 | 0.985 | 0.318 | 0.369 | 0.113 | 72.7   |
| 100 | MGM-PCStable  | 500 | DD | 0.01  | 0.979 | 0.321 | 0.365 | 0.116 | 72.8   |
| 100 | MGM-PCStable  | 500 | DD | 0.03  | 0.972 | 0.323 | 0.361 | 0.117 | 72.9   |
| 100 | MGM-PCStable  | 500 | DD | 0.05  | 0.972 | 0.323 | 0.361 | 0.117 | 72.9   |
| 100 | MGM-PCStable  | 500 | DD | 0.08  | 0.972 | 0.325 | 0.361 | 0.117 | 72.9   |

|     |           |     |    |       |       |       |       |       |        |
|-----|-----------|-----|----|-------|-------|-------|-------|-------|--------|
| 100 | FGES      | 100 | DD | 1     | 0.707 | 0.216 | 0.591 | 0.092 | 95.6   |
| 100 | FGES      | 100 | DD | 1.5   | 0.675 | 0.224 | 0.546 | 0.099 | 96.6   |
| 100 | FGES      | 100 | DD | 2     | 0.655 | 0.224 | 0.531 | 0.104 | 97.5   |
| 100 | FGES      | 100 | DD | 3     | 0.626 | 0.228 | 0.492 | 0.12  | 98.65  |
| 100 | FGES      | 100 | DD | 4     | 0.615 | 0.232 | 0.481 | 0.125 | 99.15  |
| 100 | FGES      | 100 | DD | 5     | 0.598 | 0.241 | 0.471 | 0.135 | 100.25 |
| 100 | FGES      | 300 | DD | 1     | 0.893 | 0.408 | 0.773 | 0.212 | 68.5   |
| 100 | FGES      | 300 | DD | 1.5   | 0.881 | 0.408 | 0.764 | 0.22  | 68.7   |
| 100 | FGES      | 300 | DD | 2     | 0.877 | 0.408 | 0.761 | 0.223 | 68.8   |
| 100 | FGES      | 300 | DD | 3     | 0.863 | 0.411 | 0.733 | 0.237 | 69.3   |
| 100 | FGES      | 300 | DD | 4     | 0.858 | 0.416 | 0.725 | 0.242 | 69.25  |
| 100 | FGES      | 300 | DD | 5     | 0.855 | 0.421 | 0.717 | 0.248 | 69.25  |
| 100 | FGES      | 500 | DD | 1     | 0.944 | 0.501 | 0.867 | 0.259 | 56.75  |
| 100 | FGES      | 500 | DD | 1.5   | 0.941 | 0.506 | 0.863 | 0.259 | 56.75  |
| 100 | FGES      | 500 | DD | 2     | 0.935 | 0.508 | 0.843 | 0.264 | 57.05  |
| 100 | FGES      | 500 | DD | 3     | 0.932 | 0.51  | 0.829 | 0.272 | 56.75  |
| 100 | FGES      | 500 | DD | 4     | 0.927 | 0.516 | 0.82  | 0.278 | 56.65  |
| 100 | FGES      | 500 | DD | 5     | 0.926 | 0.519 | 0.82  | 0.283 | 56.5   |
| 100 | MGM-PCMax | 100 | DD | 1e-04 | 0.936 | 0.122 | 0.322 | 0.014 | 95.95  |
| 100 | MGM-PCMax | 100 | DD | 0.001 | 0.886 | 0.142 | 0.337 | 0.018 | 95.8   |
| 100 | MGM-PCMax | 100 | DD | 0.01  | 0.873 | 0.158 | 0.357 | 0.025 | 95.8   |
| 100 | MGM-PCMax | 100 | DD | 0.03  | 0.857 | 0.163 | 0.311 | 0.027 | 96.1   |
| 100 | MGM-PCMax | 100 | DD | 0.05  | 0.852 | 0.163 | 0.333 | 0.029 | 96.15  |
| 100 | MGM-PCMax | 100 | DD | 0.08  | 0.845 | 0.163 | 0.33  | 0.029 | 96.45  |
| 100 | MGM-PCMax | 300 | DD | 1e-04 | 0.99  | 0.263 | 0.215 | 0.04  | 82.35  |
| 100 | MGM-PCMax | 300 | DD | 0.001 | 0.99  | 0.281 | 0.255 | 0.05  | 81.85  |
| 100 | MGM-PCMax | 300 | DD | 0.01  | 0.982 | 0.294 | 0.296 | 0.063 | 81.2   |
| 100 | MGM-PCMax | 300 | DD | 0.03  | 0.98  | 0.296 | 0.316 | 0.068 | 80.85  |
| 100 | MGM-PCMax | 300 | DD | 0.05  | 0.98  | 0.296 | 0.321 | 0.07  | 80.75  |
| 100 | MGM-PCMax | 300 | DD | 0.08  | 0.971 | 0.296 | 0.318 | 0.07  | 81     |
| 100 | MGM-PCMax | 500 | DD | 1e-04 | 0.985 | 0.302 | 0.277 | 0.045 | 73.7   |
| 100 | MGM-PCMax | 500 | DD | 0.001 | 0.985 | 0.318 | 0.299 | 0.055 | 73.1   |
| 100 | MGM-PCMax | 500 | DD | 0.01  | 0.979 | 0.321 | 0.31  | 0.057 | 73.15  |
| 100 | MGM-PCMax | 500 | DD | 0.03  | 0.975 | 0.323 | 0.325 | 0.061 | 73.05  |
| 100 | MGM-PCMax | 500 | DD | 0.05  | 0.975 | 0.323 | 0.319 | 0.06  | 73.15  |
| 100 | MGM-PCMax | 500 | DD | 0.08  | 0.972 | 0.325 | 0.316 | 0.06  | 73.25  |

Table 10: Comparison of mixed data structure learning algorithms with Conditional Gaussian Simulated data with average density 2.5

| Num_Vars | Algorithm | Sample.Size | Type | Parameter | AP    | AR    | AHP   | AHR   | SHD    |
|----------|-----------|-------------|------|-----------|-------|-------|-------|-------|--------|
| 50       | Copula-PC | 100         | All  | 1e-04     | 0.941 | 0.066 | 0.857 | 0.006 | 254.65 |
| 50       | Copula-PC | 100         | All  | 0.001     | 0.886 | 0.083 | 0.868 | 0.012 | 253.5  |
| 50       | Copula-PC | 100         | All  | 0.01      | 0.715 | 0.112 | 0.896 | 0.016 | 257.8  |
| 50       | Copula-PC | 100         | All  | 0.03      | 0.603 | 0.134 | 0.687 | 0.022 | 265.9  |



EVALUATION OF CAUSAL STRUCTURE LEARNING

|    |               |     |     |       |       |       |       |       |        |
|----|---------------|-----|-----|-------|-------|-------|-------|-------|--------|
| 50 | Copula-PC     | 100 | All | 0.05  | 0.513 | 0.151 | 0.566 | 0.025 | 278.25 |
| 50 | Copula-PC     | 100 | All | 0.08  | 0.438 | 0.166 | 0.45  | 0.032 | 293.5  |
| 50 | Copula-PC     | 300 | All | 1e-04 | 0.941 | 0.142 | 0.937 | 0.028 | 223.3  |
| 50 | Copula-PC     | 300 | All | 0.001 | 0.866 | 0.163 | 0.948 | 0.033 | 224.15 |
| 50 | Copula-PC     | 300 | All | 0.01  | 0.699 | 0.204 | 0.765 | 0.042 | 232.95 |
| 50 | Copula-PC     | 300 | All | 0.03  | 0.56  | 0.237 | 0.679 | 0.055 | 251.3  |
| 50 | Copula-PC     | 300 | All | 0.05  | 0.508 | 0.263 | 0.585 | 0.06  | 264.95 |
| 50 | Copula-PC     | 300 | All | 0.08  | 0.436 | 0.285 | 0.517 | 0.069 | 287.4  |
| 50 | Copula-PC     | 500 | All | 1e-04 | 0.873 | 0.189 | 0.877 | 0.049 | 229.95 |
| 50 | Copula-PC     | 500 | All | 0.001 | 0.798 | 0.221 | 0.75  | 0.055 | 232.85 |
| 50 | Copula-PC     | 500 | All | 0.01  | 0.638 | 0.267 | 0.692 | 0.076 | 248.05 |
| 50 | Copula-PC     | 500 | All | 0.03  | 0.532 | 0.301 | 0.542 | 0.092 | 270.05 |
| 50 | Copula-PC     | 500 | All | 0.05  | 0.48  | 0.322 | 0.476 | 0.103 | 288.15 |
| 50 | Copula-PC     | 500 | All | 0.08  | 0.43  | 0.348 | 0.432 | 0.122 | 309.5  |
| 50 | MGM-CPCStable | 100 | All | 1e-04 | 0.947 | 0.081 | 1     | 0.004 | 253.1  |
| 50 | MGM-CPCStable | 100 | All | 0.001 | 0.933 | 0.094 | 0.975 | 0.009 | 251.45 |
| 50 | MGM-CPCStable | 100 | All | 0.01  | 0.908 | 0.105 | 0.977 | 0.012 | 250.7  |
| 50 | MGM-CPCStable | 100 | All | 0.03  | 0.896 | 0.109 | 0.889 | 0.015 | 250.5  |
| 50 | MGM-CPCStable | 100 | All | 0.05  | 0.899 | 0.11  | 0.84  | 0.014 | 250.4  |
| 50 | MGM-CPCStable | 100 | All | 0.08  | 0.899 | 0.111 | 0.807 | 0.016 | 250.15 |
| 50 | MGM-CPCStable | 300 | All | 1e-04 | 0.993 | 0.159 | 0.958 | 0.022 | 220.2  |
| 50 | MGM-CPCStable | 300 | All | 0.001 | 0.991 | 0.169 | 0.967 | 0.026 | 218.8  |
| 50 | MGM-CPCStable | 300 | All | 0.01  | 0.985 | 0.176 | 0.942 | 0.029 | 218.05 |
| 50 | MGM-CPCStable | 300 | All | 0.03  | 0.983 | 0.178 | 0.945 | 0.03  | 217.8  |
| 50 | MGM-CPCStable | 300 | All | 0.05  | 0.978 | 0.178 | 0.971 | 0.029 | 218.1  |
| 50 | MGM-CPCStable | 300 | All | 0.08  | 0.978 | 0.179 | 0.969 | 0.032 | 217.7  |
| 50 | MGM-CPCStable | 500 | All | 1e-04 | 0.98  | 0.179 | 0.903 | 0.033 | 227.2  |
| 50 | MGM-CPCStable | 500 | All | 0.001 | 0.98  | 0.184 | 0.874 | 0.037 | 226.3  |
| 50 | MGM-CPCStable | 500 | All | 0.01  | 0.976 | 0.185 | 0.868 | 0.044 | 225.95 |
| 50 | MGM-CPCStable | 500 | All | 0.03  | 0.971 | 0.186 | 0.884 | 0.046 | 225.75 |
| 50 | MGM-CPCStable | 500 | All | 0.05  | 0.966 | 0.186 | 0.883 | 0.048 | 225.7  |
| 50 | MGM-CPCStable | 500 | All | 0.08  | 0.96  | 0.187 | 0.853 | 0.047 | 226.15 |
| 50 | MGM-PCStable  | 100 | All | 1e-04 | 0.947 | 0.081 | 0.44  | 0.019 | 254.25 |
| 50 | MGM-PCStable  | 100 | All | 0.001 | 0.933 | 0.094 | 0.446 | 0.031 | 253.35 |
| 50 | MGM-PCStable  | 100 | All | 0.01  | 0.908 | 0.105 | 0.397 | 0.037 | 253.4  |
| 50 | MGM-PCStable  | 100 | All | 0.03  | 0.896 | 0.109 | 0.369 | 0.039 | 253.75 |
| 50 | MGM-PCStable  | 100 | All | 0.05  | 0.899 | 0.11  | 0.37  | 0.04  | 253.7  |
| 50 | MGM-PCStable  | 100 | All | 0.08  | 0.899 | 0.111 | 0.366 | 0.041 | 253.7  |
| 50 | MGM-PCStable  | 300 | All | 1e-04 | 0.993 | 0.159 | 0.443 | 0.071 | 224.75 |
| 50 | MGM-PCStable  | 300 | All | 0.001 | 0.991 | 0.169 | 0.448 | 0.079 | 223.7  |
| 50 | MGM-PCStable  | 300 | All | 0.01  | 0.985 | 0.176 | 0.443 | 0.086 | 223.4  |
| 50 | MGM-PCStable  | 300 | All | 0.03  | 0.983 | 0.178 | 0.438 | 0.086 | 223.5  |
| 50 | MGM-PCStable  | 300 | All | 0.05  | 0.978 | 0.178 | 0.436 | 0.087 | 223.65 |
| 50 | MGM-PCStable  | 300 | All | 0.08  | 0.978 | 0.179 | 0.435 | 0.087 | 223.6  |
| 50 | MGM-PCStable  | 500 | All | 1e-04 | 0.98  | 0.179 | 0.442 | 0.09  | 233.15 |

|    |              |     |     |       |       |       |       |       |        |
|----|--------------|-----|-----|-------|-------|-------|-------|-------|--------|
| 50 | MGM-PCStable | 500 | All | 0.001 | 0.98  | 0.184 | 0.442 | 0.094 | 232.8  |
| 50 | MGM-PCStable | 500 | All | 0.01  | 0.976 | 0.185 | 0.439 | 0.095 | 233    |
| 50 | MGM-PCStable | 500 | All | 0.03  | 0.971 | 0.186 | 0.437 | 0.095 | 233.2  |
| 50 | MGM-PCStable | 500 | All | 0.05  | 0.966 | 0.186 | 0.433 | 0.096 | 233.35 |
| 50 | MGM-PCStable | 500 | All | 0.08  | 0.96  | 0.187 | 0.431 | 0.096 | 233.6  |
| 50 | FGES         | 100 | All | 1     | 0.715 | 0.178 | 0.538 | 0.07  | 253.2  |
| 50 | FGES         | 100 | All | 1.5   | 0.697 | 0.184 | 0.52  | 0.075 | 254.65 |
| 50 | FGES         | 100 | All | 2     | 0.686 | 0.188 | 0.508 | 0.08  | 255.25 |
| 50 | FGES         | 100 | All | 3     | 0.67  | 0.193 | 0.505 | 0.086 | 255.95 |
| 50 | FGES         | 100 | All | 4     | 0.656 | 0.197 | 0.493 | 0.094 | 256.75 |
| 50 | FGES         | 100 | All | 5     | 0.64  | 0.199 | 0.485 | 0.097 | 258.4  |
| 50 | FGES         | 300 | All | 1     | 0.867 | 0.314 | 0.69  | 0.177 | 200.8  |
| 50 | FGES         | 300 | All | 1.5   | 0.858 | 0.318 | 0.683 | 0.181 | 200.8  |
| 50 | FGES         | 300 | All | 2     | 0.853 | 0.321 | 0.682 | 0.184 | 200.65 |
| 50 | FGES         | 300 | All | 3     | 0.843 | 0.329 | 0.673 | 0.193 | 200.4  |
| 50 | FGES         | 300 | All | 4     | 0.833 | 0.332 | 0.669 | 0.197 | 200.95 |
| 50 | FGES         | 300 | All | 5     | 0.826 | 0.335 | 0.661 | 0.201 | 200.95 |
| 50 | FGES         | 500 | All | 1     | 0.885 | 0.373 | 0.755 | 0.248 | 194.6  |
| 50 | FGES         | 500 | All | 1.5   | 0.88  | 0.376 | 0.749 | 0.25  | 194.75 |
| 50 | FGES         | 500 | All | 2     | 0.876 | 0.378 | 0.737 | 0.252 | 195    |
| 50 | FGES         | 500 | All | 3     | 0.865 | 0.382 | 0.73  | 0.256 | 195.3  |
| 50 | FGES         | 500 | All | 4     | 0.855 | 0.386 | 0.713 | 0.262 | 196.25 |
| 50 | FGES         | 500 | All | 5     | 0.852 | 0.388 | 0.707 | 0.268 | 196.15 |
| 50 | MGM-PCMax    | 100 | All | 1e-04 | 0.944 | 0.084 | 0.296 | 0.008 | 254.8  |
| 50 | MGM-PCMax    | 100 | All | 0.001 | 0.931 | 0.097 | 0.295 | 0.014 | 254.25 |
| 50 | MGM-PCMax    | 100 | All | 0.01  | 0.911 | 0.106 | 0.295 | 0.017 | 254.55 |
| 50 | MGM-PCMax    | 100 | All | 0.03  | 0.899 | 0.109 | 0.29  | 0.019 | 254.5  |
| 50 | MGM-PCMax    | 100 | All | 0.05  | 0.899 | 0.11  | 0.294 | 0.02  | 254.4  |
| 50 | MGM-PCMax    | 100 | All | 0.08  | 0.899 | 0.111 | 0.29  | 0.02  | 254.4  |
| 50 | MGM-PCMax    | 300 | All | 1e-04 | 0.993 | 0.161 | 0.339 | 0.034 | 225.85 |
| 50 | MGM-PCMax    | 300 | All | 0.001 | 0.991 | 0.17  | 0.334 | 0.039 | 225.05 |
| 50 | MGM-PCMax    | 300 | All | 0.01  | 0.985 | 0.176 | 0.34  | 0.042 | 224.8  |
| 50 | MGM-PCMax    | 300 | All | 0.03  | 0.983 | 0.178 | 0.342 | 0.042 | 224.75 |
| 50 | MGM-PCMax    | 300 | All | 0.05  | 0.978 | 0.178 | 0.341 | 0.042 | 224.85 |
| 50 | MGM-PCMax    | 300 | All | 0.08  | 0.978 | 0.179 | 0.344 | 0.043 | 224.75 |
| 50 | MGM-PCMax    | 500 | All | 1e-04 | 0.978 | 0.179 | 0.346 | 0.041 | 235.1  |
| 50 | MGM-PCMax    | 500 | All | 0.001 | 0.978 | 0.184 | 0.344 | 0.042 | 234.95 |
| 50 | MGM-PCMax    | 500 | All | 0.01  | 0.974 | 0.185 | 0.348 | 0.044 | 234.85 |
| 50 | MGM-PCMax    | 500 | All | 0.03  | 0.969 | 0.186 | 0.348 | 0.044 | 235    |
| 50 | MGM-PCMax    | 500 | All | 0.05  | 0.964 | 0.186 | 0.358 | 0.048 | 234.75 |
| 50 | MGM-PCMax    | 500 | All | 0.08  | 0.958 | 0.187 | 0.348 | 0.048 | 235.25 |
| 50 | Copula-PC    | 100 | CC  | 1e-04 | 0.988 | 0.075 | 1     | 0.009 | 64.6   |
| 50 | Copula-PC    | 100 | CC  | 0.001 | 0.938 | 0.107 | 0.881 | 0.021 | 63.65  |
| 50 | Copula-PC    | 100 | CC  | 0.01  | 0.738 | 0.125 | 0.896 | 0.026 | 64.55  |
| 50 | Copula-PC    | 100 | CC  | 0.03  | 0.599 | 0.144 | 0.833 | 0.03  | 66.75  |

EVALUATION OF CAUSAL STRUCTURE LEARNING

|    |               |     |    |       |       |       |       |       |       |
|----|---------------|-----|----|-------|-------|-------|-------|-------|-------|
| 50 | Copula-PC     | 100 | CC | 0.05  | 0.532 | 0.164 | 0.795 | 0.035 | 69.4  |
| 50 | Copula-PC     | 100 | CC | 0.08  | 0.468 | 0.17  | 0.674 | 0.047 | 72.5  |
| 50 | Copula-PC     | 300 | CC | 1e-04 | 0.972 | 0.285 | 0.968 | 0.087 | 50.1  |
| 50 | Copula-PC     | 300 | CC | 0.001 | 0.937 | 0.314 | 0.986 | 0.101 | 49.5  |
| 50 | Copula-PC     | 300 | CC | 0.01  | 0.839 | 0.359 | 0.93  | 0.116 | 50.1  |
| 50 | Copula-PC     | 300 | CC | 0.03  | 0.77  | 0.395 | 0.782 | 0.146 | 51.05 |
| 50 | Copula-PC     | 300 | CC | 0.05  | 0.7   | 0.421 | 0.727 | 0.152 | 54.45 |
| 50 | Copula-PC     | 300 | CC | 0.08  | 0.637 | 0.451 | 0.68  | 0.168 | 57.65 |
| 50 | Copula-PC     | 500 | CC | 1e-04 | 0.944 | 0.387 | 0.933 | 0.152 | 46.6  |
| 50 | Copula-PC     | 500 | CC | 0.001 | 0.916 | 0.428 | 0.856 | 0.167 | 45.7  |
| 50 | Copula-PC     | 500 | CC | 0.01  | 0.861 | 0.489 | 0.897 | 0.21  | 44.7  |
| 50 | Copula-PC     | 500 | CC | 0.03  | 0.771 | 0.527 | 0.817 | 0.229 | 47.55 |
| 50 | Copula-PC     | 500 | CC | 0.05  | 0.724 | 0.549 | 0.799 | 0.24  | 49.85 |
| 50 | Copula-PC     | 500 | CC | 0.08  | 0.676 | 0.573 | 0.782 | 0.275 | 52.35 |
| 50 | MGM-CPCStable | 100 | CC | 1e-04 | 0.989 | 0.09  | 1     | 0.007 | 64.15 |
| 50 | MGM-CPCStable | 100 | CC | 0.001 | 0.956 | 0.111 | 0.917 | 0.013 | 63.6  |
| 50 | MGM-CPCStable | 100 | CC | 0.01  | 0.934 | 0.117 | 0.917 | 0.018 | 63.45 |
| 50 | MGM-CPCStable | 100 | CC | 0.03  | 0.92  | 0.118 | 0.917 | 0.02  | 63.45 |
| 50 | MGM-CPCStable | 100 | CC | 0.05  | 0.923 | 0.121 | 0.833 | 0.018 | 63.4  |
| 50 | MGM-CPCStable | 100 | CC | 0.08  | 0.923 | 0.123 | 0.806 | 0.022 | 63.3  |
| 50 | MGM-CPCStable | 300 | CC | 1e-04 | 0.993 | 0.287 | 1     | 0.07  | 50.35 |
| 50 | MGM-CPCStable | 300 | CC | 0.001 | 0.993 | 0.298 | 1     | 0.08  | 49.8  |
| 50 | MGM-CPCStable | 300 | CC | 0.01  | 0.994 | 0.306 | 0.923 | 0.083 | 49.55 |
| 50 | MGM-CPCStable | 300 | CC | 0.03  | 0.994 | 0.306 | 0.923 | 0.083 | 49.55 |
| 50 | MGM-CPCStable | 300 | CC | 0.05  | 0.988 | 0.306 | 1     | 0.083 | 49.6  |
| 50 | MGM-CPCStable | 300 | CC | 0.08  | 0.988 | 0.307 | 1     | 0.088 | 49.4  |
| 50 | MGM-CPCStable | 500 | CC | 1e-04 | 0.977 | 0.329 | 0.898 | 0.11  | 48.95 |
| 50 | MGM-CPCStable | 500 | CC | 0.001 | 0.975 | 0.337 | 0.904 | 0.122 | 48.55 |
| 50 | MGM-CPCStable | 500 | CC | 0.01  | 0.975 | 0.34  | 0.909 | 0.135 | 48.25 |
| 50 | MGM-CPCStable | 500 | CC | 0.03  | 0.975 | 0.341 | 0.92  | 0.139 | 48.05 |
| 50 | MGM-CPCStable | 500 | CC | 0.05  | 0.97  | 0.341 | 0.911 | 0.142 | 48.1  |
| 50 | MGM-CPCStable | 500 | CC | 0.08  | 0.959 | 0.341 | 0.9   | 0.14  | 48.4  |
| 50 | MGM-PCStable  | 100 | CC | 1e-04 | 0.989 | 0.09  | 0.546 | 0.028 | 64.4  |
| 50 | MGM-PCStable  | 100 | CC | 0.001 | 0.956 | 0.111 | 0.446 | 0.045 | 64.05 |
| 50 | MGM-PCStable  | 100 | CC | 0.01  | 0.934 | 0.117 | 0.384 | 0.046 | 64.25 |
| 50 | MGM-PCStable  | 100 | CC | 0.03  | 0.92  | 0.118 | 0.339 | 0.046 | 64.4  |
| 50 | MGM-PCStable  | 100 | CC | 0.05  | 0.923 | 0.121 | 0.339 | 0.046 | 64.4  |
| 50 | MGM-PCStable  | 100 | CC | 0.08  | 0.923 | 0.123 | 0.332 | 0.048 | 64.4  |
| 50 | MGM-PCStable  | 300 | CC | 1e-04 | 0.993 | 0.287 | 0.472 | 0.158 | 52.95 |
| 50 | MGM-PCStable  | 300 | CC | 0.001 | 0.993 | 0.298 | 0.479 | 0.174 | 52.6  |
| 50 | MGM-PCStable  | 300 | CC | 0.01  | 0.994 | 0.306 | 0.484 | 0.181 | 52.45 |
| 50 | MGM-PCStable  | 300 | CC | 0.03  | 0.994 | 0.306 | 0.482 | 0.181 | 52.5  |
| 50 | MGM-PCStable  | 300 | CC | 0.05  | 0.988 | 0.306 | 0.48  | 0.181 | 52.6  |
| 50 | MGM-PCStable  | 300 | CC | 0.08  | 0.988 | 0.307 | 0.479 | 0.181 | 52.6  |
| 50 | MGM-PCStable  | 500 | CC | 1e-04 | 0.977 | 0.329 | 0.487 | 0.196 | 52    |

|    |              |     |    |       |       |       |       |       |        |
|----|--------------|-----|----|-------|-------|-------|-------|-------|--------|
| 50 | MGM-PCStable | 500 | CC | 0.001 | 0.975 | 0.337 | 0.477 | 0.204 | 52     |
| 50 | MGM-PCStable | 500 | CC | 0.01  | 0.975 | 0.34  | 0.482 | 0.208 | 51.95  |
| 50 | MGM-PCStable | 500 | CC | 0.03  | 0.975 | 0.341 | 0.48  | 0.208 | 51.95  |
| 50 | MGM-PCStable | 500 | CC | 0.05  | 0.97  | 0.341 | 0.472 | 0.208 | 52.05  |
| 50 | MGM-PCStable | 500 | CC | 0.08  | 0.959 | 0.341 | 0.467 | 0.208 | 52.25  |
| 50 | FGES         | 100 | CC | 1     | 0.699 | 0.179 | 0.436 | 0.076 | 65     |
| 50 | FGES         | 100 | CC | 1.5   | 0.687 | 0.186 | 0.429 | 0.078 | 65.3   |
| 50 | FGES         | 100 | CC | 2     | 0.676 | 0.187 | 0.422 | 0.08  | 65.5   |
| 50 | FGES         | 100 | CC | 3     | 0.692 | 0.192 | 0.458 | 0.08  | 65.45  |
| 50 | FGES         | 100 | CC | 4     | 0.667 | 0.198 | 0.402 | 0.086 | 65.7   |
| 50 | FGES         | 100 | CC | 5     | 0.659 | 0.203 | 0.417 | 0.091 | 65.95  |
| 50 | FGES         | 300 | CC | 1     | 0.888 | 0.467 | 0.772 | 0.308 | 42.6   |
| 50 | FGES         | 300 | CC | 1.5   | 0.887 | 0.472 | 0.752 | 0.313 | 42.55  |
| 50 | FGES         | 300 | CC | 2     | 0.879 | 0.475 | 0.755 | 0.319 | 42.55  |
| 50 | FGES         | 300 | CC | 3     | 0.868 | 0.482 | 0.737 | 0.331 | 42.55  |
| 50 | FGES         | 300 | CC | 4     | 0.851 | 0.482 | 0.731 | 0.331 | 43.1   |
| 50 | FGES         | 300 | CC | 5     | 0.845 | 0.486 | 0.72  | 0.339 | 43.05  |
| 50 | FGES         | 500 | CC | 1     | 0.913 | 0.576 | 0.808 | 0.438 | 36.05  |
| 50 | FGES         | 500 | CC | 1.5   | 0.907 | 0.586 | 0.797 | 0.448 | 35.95  |
| 50 | FGES         | 500 | CC | 2     | 0.906 | 0.589 | 0.791 | 0.45  | 36     |
| 50 | FGES         | 500 | CC | 3     | 0.896 | 0.596 | 0.777 | 0.459 | 35.95  |
| 50 | FGES         | 500 | CC | 4     | 0.882 | 0.601 | 0.757 | 0.462 | 36.55  |
| 50 | FGES         | 500 | CC | 5     | 0.881 | 0.603 | 0.758 | 0.467 | 36.4   |
| 50 | MGM-PCMax    | 100 | CC | 1e-04 | 0.963 | 0.093 | 0.208 | 0.008 | 64.85  |
| 50 | MGM-PCMax    | 100 | CC | 0.001 | 0.93  | 0.112 | 0.187 | 0.015 | 64.75  |
| 50 | MGM-PCMax    | 100 | CC | 0.01  | 0.934 | 0.118 | 0.199 | 0.017 | 64.75  |
| 50 | MGM-PCMax    | 100 | CC | 0.03  | 0.92  | 0.118 | 0.228 | 0.02  | 64.75  |
| 50 | MGM-PCMax    | 100 | CC | 0.05  | 0.923 | 0.121 | 0.225 | 0.02  | 64.7   |
| 50 | MGM-PCMax    | 100 | CC | 0.08  | 0.923 | 0.123 | 0.24  | 0.022 | 64.6   |
| 50 | MGM-PCMax    | 300 | CC | 1e-04 | 0.993 | 0.287 | 0.379 | 0.072 | 53.85  |
| 50 | MGM-PCMax    | 300 | CC | 0.001 | 0.994 | 0.3   | 0.349 | 0.08  | 53.55  |
| 50 | MGM-PCMax    | 300 | CC | 0.01  | 0.994 | 0.306 | 0.35  | 0.083 | 53.45  |
| 50 | MGM-PCMax    | 300 | CC | 0.03  | 0.994 | 0.306 | 0.348 | 0.083 | 53.5   |
| 50 | MGM-PCMax    | 300 | CC | 0.05  | 0.988 | 0.306 | 0.345 | 0.083 | 53.6   |
| 50 | MGM-PCMax    | 300 | CC | 0.08  | 0.988 | 0.307 | 0.347 | 0.085 | 53.6   |
| 50 | MGM-PCMax    | 500 | CC | 1e-04 | 0.977 | 0.329 | 0.352 | 0.079 | 54.2   |
| 50 | MGM-PCMax    | 500 | CC | 0.001 | 0.975 | 0.337 | 0.347 | 0.081 | 54.2   |
| 50 | MGM-PCMax    | 500 | CC | 0.01  | 0.975 | 0.34  | 0.344 | 0.082 | 54.2   |
| 50 | MGM-PCMax    | 500 | CC | 0.03  | 0.975 | 0.341 | 0.348 | 0.084 | 54.15  |
| 50 | MGM-PCMax    | 500 | CC | 0.05  | 0.97  | 0.341 | 0.344 | 0.084 | 54.2   |
| 50 | MGM-PCMax    | 500 | CC | 0.08  | 0.953 | 0.341 | 0.33  | 0.083 | 54.65  |
| 50 | Copula-PC    | 100 | CD | 1e-04 | 0.925 | 0.065 | 0.833 | 0.006 | 130.2  |
| 50 | Copula-PC    | 100 | CD | 0.001 | 0.829 | 0.075 | 0.889 | 0.009 | 130.4  |
| 50 | Copula-PC    | 100 | CD | 0.01  | 0.645 | 0.109 | 0.917 | 0.015 | 133.15 |
| 50 | Copula-PC    | 100 | CD | 0.03  | 0.535 | 0.128 | 0.628 | 0.02  | 138.15 |

EVALUATION OF CAUSAL STRUCTURE LEARNING

|    |               |     |    |       |       |       |       |       |        |
|----|---------------|-----|----|-------|-------|-------|-------|-------|--------|
| 50 | Copula-PC     | 100 | CD | 0.05  | 0.476 | 0.141 | 0.497 | 0.023 | 144.1  |
| 50 | Copula-PC     | 100 | CD | 0.08  | 0.41  | 0.163 | 0.399 | 0.028 | 152.3  |
| 50 | Copula-PC     | 300 | CD | 1e-04 | 0.895 | 0.09  | 0.875 | 0.009 | 118.45 |
| 50 | Copula-PC     | 300 | CD | 0.001 | 0.781 | 0.107 | 0.875 | 0.011 | 119.35 |
| 50 | Copula-PC     | 300 | CD | 0.01  | 0.583 | 0.141 | 0.643 | 0.018 | 124.15 |
| 50 | Copula-PC     | 300 | CD | 0.03  | 0.45  | 0.173 | 0.537 | 0.024 | 134.95 |
| 50 | Copula-PC     | 300 | CD | 0.05  | 0.424 | 0.194 | 0.409 | 0.028 | 141.05 |
| 50 | Copula-PC     | 300 | CD | 0.08  | 0.356 | 0.212 | 0.36  | 0.034 | 153.8  |
| 50 | Copula-PC     | 500 | CD | 1e-04 | 0.857 | 0.094 | 0.75  | 0.014 | 119.75 |
| 50 | Copula-PC     | 500 | CD | 0.001 | 0.748 | 0.117 | 0.582 | 0.016 | 121.15 |
| 50 | Copula-PC     | 500 | CD | 0.01  | 0.525 | 0.146 | 0.553 | 0.027 | 128.9  |
| 50 | Copula-PC     | 500 | CD | 0.03  | 0.427 | 0.178 | 0.457 | 0.043 | 138.6  |
| 50 | Copula-PC     | 500 | CD | 0.05  | 0.372 | 0.192 | 0.32  | 0.05  | 147.9  |
| 50 | Copula-PC     | 500 | CD | 0.08  | 0.33  | 0.216 | 0.296 | 0.06  | 159.05 |
| 50 | MGM-CPCStable | 100 | CD | 1e-04 | 0.95  | 0.08  | 1     | 0.004 | 129.4  |
| 50 | MGM-CPCStable | 100 | CD | 0.001 | 0.942 | 0.09  | 1     | 0.009 | 128.7  |
| 50 | MGM-CPCStable | 100 | CD | 0.01  | 0.878 | 0.104 | 1     | 0.011 | 128.3  |
| 50 | MGM-CPCStable | 100 | CD | 0.03  | 0.858 | 0.107 | 0.917 | 0.013 | 128.35 |
| 50 | MGM-CPCStable | 100 | CD | 0.05  | 0.859 | 0.109 | 0.833 | 0.013 | 128.3  |
| 50 | MGM-CPCStable | 100 | CD | 0.08  | 0.859 | 0.109 | 0.806 | 0.014 | 128.3  |
| 50 | MGM-CPCStable | 300 | CD | 1e-04 | 0.995 | 0.107 | 0.833 | 0.007 | 116.65 |
| 50 | MGM-CPCStable | 300 | CD | 0.001 | 0.982 | 0.116 | 0.833 | 0.008 | 116.2  |
| 50 | MGM-CPCStable | 300 | CD | 0.01  | 0.961 | 0.123 | 0.857 | 0.01  | 115.9  |
| 50 | MGM-CPCStable | 300 | CD | 0.03  | 0.961 | 0.124 | 0.875 | 0.01  | 115.75 |
| 50 | MGM-CPCStable | 300 | CD | 0.05  | 0.961 | 0.124 | 0.857 | 0.01  | 115.8  |
| 50 | MGM-CPCStable | 300 | CD | 0.08  | 0.952 | 0.125 | 0.857 | 0.012 | 115.7  |
| 50 | MGM-CPCStable | 500 | CD | 1e-04 | 0.992 | 0.102 | 0.833 | 0.009 | 117.9  |
| 50 | MGM-CPCStable | 500 | CD | 0.001 | 0.995 | 0.108 | 0.857 | 0.011 | 117.45 |
| 50 | MGM-CPCStable | 500 | CD | 0.01  | 0.995 | 0.109 | 0.732 | 0.018 | 117.3  |
| 50 | MGM-CPCStable | 500 | CD | 0.03  | 0.979 | 0.109 | 0.837 | 0.018 | 117.3  |
| 50 | MGM-CPCStable | 500 | CD | 0.05  | 0.974 | 0.11  | 0.837 | 0.02  | 117.25 |
| 50 | MGM-CPCStable | 500 | CD | 0.08  | 0.974 | 0.111 | 0.69  | 0.02  | 117.3  |
| 50 | MGM-PCStable  | 100 | CD | 1e-04 | 0.95  | 0.08  | 0.319 | 0.014 | 130.35 |
| 50 | MGM-PCStable  | 100 | CD | 0.001 | 0.942 | 0.09  | 0.383 | 0.025 | 129.8  |
| 50 | MGM-PCStable  | 100 | CD | 0.01  | 0.878 | 0.104 | 0.332 | 0.03  | 130    |
| 50 | MGM-PCStable  | 100 | CD | 0.03  | 0.858 | 0.107 | 0.319 | 0.033 | 130.25 |
| 50 | MGM-PCStable  | 100 | CD | 0.05  | 0.859 | 0.109 | 0.327 | 0.035 | 130.15 |
| 50 | MGM-PCStable  | 100 | CD | 0.08  | 0.859 | 0.109 | 0.328 | 0.035 | 130.15 |
| 50 | MGM-PCStable  | 300 | CD | 1e-04 | 0.995 | 0.107 | 0.402 | 0.039 | 118.15 |
| 50 | MGM-PCStable  | 300 | CD | 0.001 | 0.982 | 0.116 | 0.392 | 0.043 | 117.75 |
| 50 | MGM-PCStable  | 300 | CD | 0.01  | 0.961 | 0.123 | 0.404 | 0.049 | 117.65 |
| 50 | MGM-PCStable  | 300 | CD | 0.03  | 0.961 | 0.124 | 0.397 | 0.049 | 117.6  |
| 50 | MGM-PCStable  | 300 | CD | 0.05  | 0.961 | 0.124 | 0.401 | 0.05  | 117.55 |
| 50 | MGM-PCStable  | 300 | CD | 0.08  | 0.952 | 0.125 | 0.397 | 0.051 | 117.6  |
| 50 | MGM-PCStable  | 500 | CD | 1e-04 | 0.992 | 0.102 | 0.401 | 0.041 | 119.85 |

|    |              |     |    |       |       |       |       |       |        |
|----|--------------|-----|----|-------|-------|-------|-------|-------|--------|
| 50 | MGM-PCStable | 500 | CD | 0.001 | 0.995 | 0.108 | 0.423 | 0.047 | 119.55 |
| 50 | MGM-PCStable | 500 | CD | 0.01  | 0.995 | 0.109 | 0.42  | 0.046 | 119.55 |
| 50 | MGM-PCStable | 500 | CD | 0.03  | 0.979 | 0.109 | 0.408 | 0.046 | 119.65 |
| 50 | MGM-PCStable | 500 | CD | 0.05  | 0.974 | 0.11  | 0.409 | 0.047 | 119.7  |
| 50 | MGM-PCStable | 500 | CD | 0.08  | 0.974 | 0.111 | 0.41  | 0.048 | 119.65 |
| 50 | FGES         | 100 | CD | 1     | 0.698 | 0.178 | 0.573 | 0.071 | 129.65 |
| 50 | FGES         | 100 | CD | 1.5   | 0.68  | 0.184 | 0.545 | 0.076 | 130.55 |
| 50 | FGES         | 100 | CD | 2     | 0.669 | 0.187 | 0.511 | 0.079 | 131.25 |
| 50 | FGES         | 100 | CD | 3     | 0.651 | 0.192 | 0.508 | 0.086 | 131.75 |
| 50 | FGES         | 100 | CD | 4     | 0.642 | 0.195 | 0.488 | 0.092 | 132.1  |
| 50 | FGES         | 100 | CD | 5     | 0.625 | 0.196 | 0.476 | 0.095 | 133.1  |
| 50 | FGES         | 300 | CD | 1     | 0.842 | 0.273 | 0.621 | 0.134 | 107.8  |
| 50 | FGES         | 300 | CD | 1.5   | 0.831 | 0.279 | 0.608 | 0.138 | 107.85 |
| 50 | FGES         | 300 | CD | 2     | 0.827 | 0.281 | 0.604 | 0.142 | 107.8  |
| 50 | FGES         | 300 | CD | 3     | 0.814 | 0.29  | 0.602 | 0.15  | 107.7  |
| 50 | FGES         | 300 | CD | 4     | 0.811 | 0.295 | 0.605 | 0.157 | 107.6  |
| 50 | FGES         | 300 | CD | 5     | 0.803 | 0.299 | 0.596 | 0.16  | 107.75 |
| 50 | FGES         | 500 | CD | 1     | 0.828 | 0.304 | 0.704 | 0.189 | 104.9  |
| 50 | FGES         | 500 | CD | 1.5   | 0.825 | 0.304 | 0.701 | 0.189 | 105.1  |
| 50 | FGES         | 500 | CD | 2     | 0.819 | 0.308 | 0.682 | 0.19  | 105.35 |
| 50 | FGES         | 500 | CD | 3     | 0.803 | 0.311 | 0.679 | 0.194 | 105.8  |
| 50 | FGES         | 500 | CD | 4     | 0.796 | 0.318 | 0.657 | 0.201 | 106.05 |
| 50 | FGES         | 500 | CD | 5     | 0.789 | 0.322 | 0.644 | 0.207 | 106.15 |
| 50 | MGM-PCMax    | 100 | CD | 1e-04 | 0.953 | 0.083 | 0.212 | 0.007 | 130.3  |
| 50 | MGM-PCMax    | 100 | CD | 0.001 | 0.943 | 0.093 | 0.237 | 0.011 | 129.95 |
| 50 | MGM-PCMax    | 100 | CD | 0.01  | 0.881 | 0.104 | 0.23  | 0.015 | 130.25 |
| 50 | MGM-PCMax    | 100 | CD | 0.03  | 0.861 | 0.107 | 0.196 | 0.016 | 130.5  |
| 50 | MGM-PCMax    | 100 | CD | 0.05  | 0.859 | 0.109 | 0.207 | 0.017 | 130.4  |
| 50 | MGM-PCMax    | 100 | CD | 0.08  | 0.859 | 0.109 | 0.205 | 0.017 | 130.45 |
| 50 | MGM-PCMax    | 300 | CD | 1e-04 | 0.995 | 0.11  | 0.279 | 0.02  | 118.5  |
| 50 | MGM-PCMax    | 300 | CD | 0.001 | 0.982 | 0.117 | 0.254 | 0.023 | 118.3  |
| 50 | MGM-PCMax    | 300 | CD | 0.01  | 0.961 | 0.123 | 0.291 | 0.027 | 118.05 |
| 50 | MGM-PCMax    | 300 | CD | 0.03  | 0.961 | 0.124 | 0.294 | 0.028 | 117.95 |
| 50 | MGM-PCMax    | 300 | CD | 0.05  | 0.961 | 0.124 | 0.303 | 0.029 | 117.85 |
| 50 | MGM-PCMax    | 300 | CD | 0.08  | 0.952 | 0.125 | 0.304 | 0.029 | 117.85 |
| 50 | MGM-PCMax    | 500 | CD | 1e-04 | 0.967 | 0.102 | 0.358 | 0.026 | 119.5  |
| 50 | MGM-PCMax    | 500 | CD | 0.001 | 0.995 | 0.108 | 0.38  | 0.026 | 119.25 |
| 50 | MGM-PCMax    | 500 | CD | 0.01  | 0.995 | 0.109 | 0.439 | 0.029 | 118.9  |
| 50 | MGM-PCMax    | 500 | CD | 0.03  | 0.979 | 0.109 | 0.414 | 0.029 | 119    |
| 50 | MGM-PCMax    | 500 | CD | 0.05  | 0.974 | 0.11  | 0.443 | 0.036 | 118.7  |
| 50 | MGM-PCMax    | 500 | CD | 0.08  | 0.974 | 0.111 | 0.427 | 0.036 | 118.75 |
| 50 | Copula-PC    | 100 | DD | 1e-04 | 0.974 | 0.061 | 0.667 | 0.004 | 59.85  |
| 50 | Copula-PC    | 100 | DD | 0.001 | 0.905 | 0.078 | 0.8   | 0.008 | 59.45  |
| 50 | Copula-PC    | 100 | DD | 0.01  | 0.751 | 0.109 | 0.833 | 0.01  | 60.1   |
| 50 | Copula-PC    | 100 | DD | 0.03  | 0.683 | 0.14  | 0.645 | 0.017 | 61     |

EVALUATION OF CAUSAL STRUCTURE LEARNING

|    |               |     |    |       |       |       |       |       |       |
|----|---------------|-----|----|-------|-------|-------|-------|-------|-------|
| 50 | Copula-PC     | 100 | DD | 0.05  | 0.543 | 0.16  | 0.469 | 0.02  | 64.75 |
| 50 | Copula-PC     | 100 | DD | 0.08  | 0.452 | 0.174 | 0.368 | 0.026 | 68.7  |
| 50 | Copula-PC     | 300 | DD | 1e-04 | 0.888 | 0.103 | 1     | 0.001 | 54.75 |
| 50 | Copula-PC     | 300 | DD | 0.001 | 0.794 | 0.125 | 0.75  | 0.005 | 55.3  |
| 50 | Copula-PC     | 300 | DD | 0.01  | 0.59  | 0.179 | 0.393 | 0.013 | 58.7  |
| 50 | Copula-PC     | 300 | DD | 0.03  | 0.446 | 0.211 | 0.462 | 0.02  | 65.3  |
| 50 | Copula-PC     | 300 | DD | 0.05  | 0.407 | 0.242 | 0.354 | 0.026 | 69.45 |
| 50 | Copula-PC     | 300 | DD | 0.08  | 0.354 | 0.265 | 0.339 | 0.038 | 75.95 |
| 50 | Copula-PC     | 500 | DD | 1e-04 | 0.803 | 0.188 | 0.592 | 0.015 | 63.6  |
| 50 | Copula-PC     | 500 | DD | 0.001 | 0.71  | 0.228 | 0.429 | 0.019 | 66    |
| 50 | Copula-PC     | 500 | DD | 0.01  | 0.525 | 0.295 | 0.345 | 0.037 | 74.45 |
| 50 | Copula-PC     | 500 | DD | 0.03  | 0.423 | 0.333 | 0.247 | 0.051 | 83.9  |
| 50 | Copula-PC     | 500 | DD | 0.05  | 0.394 | 0.363 | 0.263 | 0.071 | 90.4  |
| 50 | Copula-PC     | 500 | DD | 0.08  | 0.354 | 0.397 | 0.237 | 0.094 | 98.1  |
| 50 | MGM-CPCStable | 100 | DD | 1e-04 | 0.955 | 0.076 | 1     | 0.001 | 59.55 |
| 50 | MGM-CPCStable | 100 | DD | 0.001 | 0.946 | 0.087 | 1     | 0.005 | 59.15 |
| 50 | MGM-CPCStable | 100 | DD | 0.01  | 0.933 | 0.095 | 1     | 0.007 | 58.95 |
| 50 | MGM-CPCStable | 100 | DD | 0.03  | 0.933 | 0.102 | 0.889 | 0.012 | 58.7  |
| 50 | MGM-CPCStable | 100 | DD | 0.05  | 0.933 | 0.102 | 0.889 | 0.012 | 58.7  |
| 50 | MGM-CPCStable | 100 | DD | 0.08  | 0.933 | 0.106 | 0.917 | 0.013 | 58.55 |
| 50 | MGM-CPCStable | 300 | DD | 1e-04 | 0.988 | 0.141 | 1     | 0.001 | 53.2  |
| 50 | MGM-CPCStable | 300 | DD | 0.001 | 0.988 | 0.152 | 0.75  | 0.004 | 52.8  |
| 50 | MGM-CPCStable | 300 | DD | 0.01  | 0.975 | 0.159 | 0.875 | 0.009 | 52.6  |
| 50 | MGM-CPCStable | 300 | DD | 0.03  | 0.968 | 0.161 | 0.917 | 0.015 | 52.5  |
| 50 | MGM-CPCStable | 300 | DD | 0.05  | 0.962 | 0.161 | 0.9   | 0.011 | 52.7  |
| 50 | MGM-CPCStable | 300 | DD | 0.08  | 0.969 | 0.161 | 0.9   | 0.011 | 52.6  |
| 50 | MGM-CPCStable | 500 | DD | 1e-04 | 0.974 | 0.191 | 0.75  | 0.006 | 60.35 |
| 50 | MGM-CPCStable | 500 | DD | 0.001 | 0.974 | 0.193 | 0.55  | 0.006 | 60.3  |
| 50 | MGM-CPCStable | 500 | DD | 0.01  | 0.959 | 0.194 | 0.625 | 0.008 | 60.4  |
| 50 | MGM-CPCStable | 500 | DD | 0.03  | 0.953 | 0.194 | 0.625 | 0.009 | 60.4  |
| 50 | MGM-CPCStable | 500 | DD | 0.05  | 0.953 | 0.194 | 0.679 | 0.011 | 60.35 |
| 50 | MGM-CPCStable | 500 | DD | 0.08  | 0.943 | 0.194 | 0.607 | 0.011 | 60.45 |
| 50 | MGM-PCStable  | 100 | DD | 1e-04 | 0.955 | 0.076 | 0.5   | 0.019 | 59.5  |
| 50 | MGM-PCStable  | 100 | DD | 0.001 | 0.946 | 0.087 | 0.469 | 0.028 | 59.5  |
| 50 | MGM-PCStable  | 100 | DD | 0.01  | 0.933 | 0.095 | 0.526 | 0.04  | 59.15 |
| 50 | MGM-PCStable  | 100 | DD | 0.03  | 0.933 | 0.102 | 0.482 | 0.044 | 59.1  |
| 50 | MGM-PCStable  | 100 | DD | 0.05  | 0.933 | 0.102 | 0.477 | 0.044 | 59.15 |
| 50 | MGM-PCStable  | 100 | DD | 0.08  | 0.933 | 0.106 | 0.47  | 0.045 | 59.15 |
| 50 | MGM-PCStable  | 300 | DD | 1e-04 | 0.988 | 0.141 | 0.412 | 0.048 | 53.65 |
| 50 | MGM-PCStable  | 300 | DD | 0.001 | 0.988 | 0.152 | 0.391 | 0.054 | 53.35 |
| 50 | MGM-PCStable  | 300 | DD | 0.01  | 0.975 | 0.159 | 0.36  | 0.063 | 53.3  |
| 50 | MGM-PCStable  | 300 | DD | 0.03  | 0.968 | 0.161 | 0.353 | 0.063 | 53.4  |
| 50 | MGM-PCStable  | 300 | DD | 0.05  | 0.962 | 0.161 | 0.345 | 0.065 | 53.5  |
| 50 | MGM-PCStable  | 300 | DD | 0.08  | 0.969 | 0.161 | 0.347 | 0.065 | 53.4  |
| 50 | MGM-PCStable  | 500 | DD | 1e-04 | 0.974 | 0.191 | 0.429 | 0.081 | 61.3  |

|     |              |     |     |       |       |       |       |       |        |
|-----|--------------|-----|-----|-------|-------|-------|-------|-------|--------|
| 50  | MGM-PCStable | 500 | DD  | 0.001 | 0.974 | 0.193 | 0.427 | 0.083 | 61.25  |
| 50  | MGM-PCStable | 500 | DD  | 0.01  | 0.959 | 0.194 | 0.421 | 0.083 | 61.5   |
| 50  | MGM-PCStable | 500 | DD  | 0.03  | 0.953 | 0.194 | 0.421 | 0.083 | 61.6   |
| 50  | MGM-PCStable | 500 | DD  | 0.05  | 0.953 | 0.194 | 0.421 | 0.083 | 61.6   |
| 50  | MGM-PCStable | 500 | DD  | 0.08  | 0.943 | 0.194 | 0.415 | 0.083 | 61.7   |
| 50  | FGES         | 100 | DD  | 1     | 0.815 | 0.177 | 0.632 | 0.06  | 58.55  |
| 50  | FGES         | 100 | DD  | 1.5   | 0.781 | 0.183 | 0.63  | 0.069 | 58.8   |
| 50  | FGES         | 100 | DD  | 2     | 0.779 | 0.192 | 0.599 | 0.079 | 58.5   |
| 50  | FGES         | 100 | DD  | 3     | 0.749 | 0.196 | 0.579 | 0.092 | 58.75  |
| 50  | FGES         | 100 | DD  | 4     | 0.728 | 0.199 | 0.586 | 0.103 | 58.95  |
| 50  | FGES         | 100 | DD  | 5     | 0.719 | 0.2   | 0.563 | 0.105 | 59.35  |
| 50  | FGES         | 300 | DD  | 1     | 0.86  | 0.234 | 0.626 | 0.118 | 50.4   |
| 50  | FGES         | 300 | DD  | 1.5   | 0.844 | 0.236 | 0.663 | 0.119 | 50.4   |
| 50  | FGES         | 300 | DD  | 2     | 0.844 | 0.238 | 0.663 | 0.121 | 50.3   |
| 50  | FGES         | 300 | DD  | 3     | 0.84  | 0.249 | 0.652 | 0.129 | 50.15  |
| 50  | FGES         | 300 | DD  | 4     | 0.833 | 0.251 | 0.647 | 0.131 | 50.25  |
| 50  | FGES         | 300 | DD  | 5     | 0.833 | 0.251 | 0.668 | 0.133 | 50.15  |
| 50  | FGES         | 500 | DD  | 1     | 0.956 | 0.319 | 0.713 | 0.178 | 53.65  |
| 50  | FGES         | 500 | DD  | 1.5   | 0.951 | 0.321 | 0.709 | 0.178 | 53.7   |
| 50  | FGES         | 500 | DD  | 2     | 0.951 | 0.321 | 0.722 | 0.181 | 53.65  |
| 50  | FGES         | 500 | DD  | 3     | 0.951 | 0.322 | 0.722 | 0.182 | 53.55  |
| 50  | FGES         | 500 | DD  | 4     | 0.945 | 0.321 | 0.731 | 0.19  | 53.65  |
| 50  | FGES         | 500 | DD  | 5     | 0.943 | 0.321 | 0.732 | 0.197 | 53.6   |
| 50  | MGM-PCMax    | 100 | DD  | 1e-04 | 0.955 | 0.078 | 0.417 | 0.013 | 59.65  |
| 50  | MGM-PCMax    | 100 | DD  | 0.001 | 0.946 | 0.088 | 0.416 | 0.018 | 59.55  |
| 50  | MGM-PCMax    | 100 | DD  | 0.01  | 0.933 | 0.095 | 0.408 | 0.02  | 59.55  |
| 50  | MGM-PCMax    | 100 | DD  | 0.03  | 0.933 | 0.102 | 0.414 | 0.025 | 59.25  |
| 50  | MGM-PCMax    | 100 | DD  | 0.05  | 0.933 | 0.102 | 0.414 | 0.025 | 59.3   |
| 50  | MGM-PCMax    | 100 | DD  | 0.08  | 0.933 | 0.106 | 0.394 | 0.025 | 59.35  |
| 50  | MGM-PCMax    | 300 | DD  | 1e-04 | 0.988 | 0.144 | 0.373 | 0.026 | 53.5   |
| 50  | MGM-PCMax    | 300 | DD  | 0.001 | 0.988 | 0.152 | 0.38  | 0.031 | 53.2   |
| 50  | MGM-PCMax    | 300 | DD  | 0.01  | 0.975 | 0.159 | 0.292 | 0.031 | 53.3   |
| 50  | MGM-PCMax    | 300 | DD  | 0.03  | 0.968 | 0.161 | 0.302 | 0.032 | 53.3   |
| 50  | MGM-PCMax    | 300 | DD  | 0.05  | 0.962 | 0.161 | 0.3   | 0.03  | 53.4   |
| 50  | MGM-PCMax    | 300 | DD  | 0.08  | 0.969 | 0.161 | 0.3   | 0.03  | 53.3   |
| 50  | MGM-PCMax    | 500 | DD  | 1e-04 | 0.974 | 0.193 | 0.362 | 0.035 | 61.4   |
| 50  | MGM-PCMax    | 500 | DD  | 0.001 | 0.964 | 0.193 | 0.353 | 0.037 | 61.5   |
| 50  | MGM-PCMax    | 500 | DD  | 0.01  | 0.949 | 0.194 | 0.342 | 0.037 | 61.75  |
| 50  | MGM-PCMax    | 500 | DD  | 0.03  | 0.943 | 0.194 | 0.342 | 0.037 | 61.85  |
| 50  | MGM-PCMax    | 500 | DD  | 0.05  | 0.943 | 0.194 | 0.342 | 0.037 | 61.85  |
| 50  | MGM-PCMax    | 500 | DD  | 0.08  | 0.943 | 0.194 | 0.342 | 0.037 | 61.85  |
| 100 | Copula-PC    | 300 | All | 1e-04 | 0.923 | 0.129 | 0.975 | 0.025 | 476.8  |
| 100 | Copula-PC    | 300 | All | 0.001 | 0.836 | 0.152 | 0.979 | 0.032 | 479.05 |
| 100 | Copula-PC    | 300 | All | 0.01  | 0.611 | 0.188 | 0.857 | 0.04  | 513.65 |
| 100 | Copula-PC    | 300 | All | 0.03  | 0.45  | 0.213 | 0.635 | 0.049 | 576.6  |



EVALUATION OF CAUSAL STRUCTURE LEARNING

|     |               |     |     |       |       |       |       |       |        |
|-----|---------------|-----|-----|-------|-------|-------|-------|-------|--------|
| 100 | Copula-PC     | 300 | All | 0.05  | 0.382 | 0.229 | 0.536 | 0.058 | 626.6  |
| 100 | Copula-PC     | 300 | All | 0.08  | 0.322 | 0.248 | 0.448 | 0.068 | 697.95 |
| 100 | Copula-PC     | 500 | All | 1e-04 | 0.826 | 0.191 | 0.878 | 0.042 | 485.5  |
| 100 | Copula-PC     | 500 | All | 0.001 | 0.716 | 0.212 | 0.797 | 0.053 | 500.2  |
| 100 | Copula-PC     | 500 | All | 0.01  | 0.507 | 0.25  | 0.533 | 0.07  | 569    |
| 100 | Copula-PC     | 500 | All | 0.03  | 0.391 | 0.273 | 0.413 | 0.086 | 653.9  |
| 100 | Copula-PC     | 500 | All | 0.05  | 0.338 | 0.288 | 0.347 | 0.096 | 719.05 |
| 100 | Copula-PC     | 500 | All | 0.08  | 0.295 | 0.305 | 0.296 | 0.112 | 797.6  |
| 100 | MGM-CPCStable | 100 | All | 1e-04 | 0.946 | 0.072 | 1     | 0.006 | 576.45 |
| 100 | MGM-CPCStable | 100 | All | 0.001 | 0.913 | 0.089 | 0.956 | 0.01  | 573.1  |
| 100 | MGM-CPCStable | 100 | All | 0.01  | 0.886 | 0.101 | 0.942 | 0.015 | 570.85 |
| 100 | MGM-CPCStable | 100 | All | 0.03  | 0.876 | 0.105 | 0.93  | 0.018 | 569.7  |
| 100 | MGM-CPCStable | 100 | All | 0.05  | 0.868 | 0.107 | 0.913 | 0.02  | 569.5  |
| 100 | MGM-CPCStable | 100 | All | 0.08  | 0.87  | 0.109 | 0.911 | 0.021 | 568.65 |
| 100 | MGM-CPCStable | 300 | All | 1e-04 | 0.984 | 0.154 | 0.975 | 0.019 | 467.9  |
| 100 | MGM-CPCStable | 300 | All | 0.001 | 0.978 | 0.166 | 0.986 | 0.025 | 464.1  |
| 100 | MGM-CPCStable | 300 | All | 0.01  | 0.971 | 0.173 | 0.95  | 0.031 | 461.7  |
| 100 | MGM-CPCStable | 300 | All | 0.03  | 0.965 | 0.175 | 0.899 | 0.034 | 461.65 |
| 100 | MGM-CPCStable | 300 | All | 0.05  | 0.963 | 0.176 | 0.894 | 0.035 | 461.25 |
| 100 | MGM-CPCStable | 300 | All | 0.08  | 0.962 | 0.176 | 0.892 | 0.039 | 460.4  |
| 100 | MGM-CPCStable | 500 | All | 1e-04 | 0.985 | 0.187 | 0.962 | 0.033 | 469.8  |
| 100 | MGM-CPCStable | 500 | All | 0.001 | 0.984 | 0.192 | 0.979 | 0.04  | 467    |
| 100 | MGM-CPCStable | 500 | All | 0.01  | 0.98  | 0.194 | 0.964 | 0.044 | 465.8  |
| 100 | MGM-CPCStable | 500 | All | 0.03  | 0.975 | 0.196 | 0.944 | 0.048 | 465.2  |
| 100 | MGM-CPCStable | 500 | All | 0.05  | 0.972 | 0.196 | 0.933 | 0.05  | 465.2  |
| 100 | MGM-CPCStable | 500 | All | 0.08  | 0.968 | 0.197 | 0.924 | 0.053 | 465    |
| 100 | MGM-PCStable  | 100 | All | 1e-04 | 0.946 | 0.072 | 0.435 | 0.021 | 579.35 |
| 100 | MGM-PCStable  | 100 | All | 0.001 | 0.913 | 0.089 | 0.423 | 0.033 | 577.75 |
| 100 | MGM-PCStable  | 100 | All | 0.01  | 0.886 | 0.101 | 0.425 | 0.046 | 577.05 |
| 100 | MGM-PCStable  | 100 | All | 0.03  | 0.876 | 0.105 | 0.419 | 0.051 | 577.25 |
| 100 | MGM-PCStable  | 100 | All | 0.05  | 0.868 | 0.107 | 0.407 | 0.052 | 578.35 |
| 100 | MGM-PCStable  | 100 | All | 0.08  | 0.87  | 0.109 | 0.403 | 0.053 | 578.2  |
| 100 | MGM-PCStable  | 300 | All | 1e-04 | 0.984 | 0.154 | 0.465 | 0.077 | 474.95 |
| 100 | MGM-PCStable  | 300 | All | 0.001 | 0.978 | 0.166 | 0.452 | 0.087 | 473.85 |
| 100 | MGM-PCStable  | 300 | All | 0.01  | 0.971 | 0.173 | 0.437 | 0.092 | 474.05 |
| 100 | MGM-PCStable  | 300 | All | 0.03  | 0.965 | 0.175 | 0.43  | 0.093 | 474.65 |
| 100 | MGM-PCStable  | 300 | All | 0.05  | 0.963 | 0.176 | 0.427 | 0.093 | 474.9  |
| 100 | MGM-PCStable  | 300 | All | 0.08  | 0.962 | 0.176 | 0.427 | 0.094 | 475    |
| 100 | MGM-PCStable  | 500 | All | 1e-04 | 0.985 | 0.187 | 0.468 | 0.107 | 480.65 |
| 100 | MGM-PCStable  | 500 | All | 0.001 | 0.984 | 0.192 | 0.467 | 0.112 | 479.85 |
| 100 | MGM-PCStable  | 500 | All | 0.01  | 0.98  | 0.194 | 0.464 | 0.114 | 479.9  |
| 100 | MGM-PCStable  | 500 | All | 0.03  | 0.975 | 0.196 | 0.462 | 0.116 | 480.1  |
| 100 | MGM-PCStable  | 500 | All | 0.05  | 0.972 | 0.196 | 0.461 | 0.116 | 480.35 |
| 100 | MGM-PCStable  | 500 | All | 0.08  | 0.968 | 0.197 | 0.458 | 0.117 | 480.8  |
| 100 | FGES          | 100 | All | 1     | 0.663 | 0.155 | 0.579 | 0.087 | 577.95 |

|     |           |     |     |       |       |       |       |       |        |
|-----|-----------|-----|-----|-------|-------|-------|-------|-------|--------|
| 100 | FGES      | 100 | All | 1.5   | 0.645 | 0.157 | 0.554 | 0.09  | 581.2  |
| 100 | FGES      | 100 | All | 2     | 0.627 | 0.159 | 0.525 | 0.091 | 585.5  |
| 100 | FGES      | 100 | All | 3     | 0.604 | 0.163 | 0.497 | 0.097 | 590.4  |
| 100 | FGES      | 100 | All | 4     | 0.589 | 0.166 | 0.478 | 0.1   | 594.6  |
| 100 | FGES      | 100 | All | 5     | 0.581 | 0.169 | 0.465 | 0.105 | 596.5  |
| 100 | FGES      | 300 | All | 1     | 0.842 | 0.283 | 0.702 | 0.161 | 433.8  |
| 100 | FGES      | 300 | All | 1.5   | 0.828 | 0.286 | 0.675 | 0.172 | 434.35 |
| 100 | FGES      | 300 | All | 2     | 0.82  | 0.29  | 0.669 | 0.181 | 433.95 |
| 100 | FGES      | 300 | All | 3     | 0.812 | 0.296 | 0.663 | 0.185 | 434.3  |
| 100 | FGES      | 300 | All | 4     | 0.804 | 0.299 | 0.651 | 0.188 | 435.65 |
| 100 | FGES      | 300 | All | 5     | 0.794 | 0.302 | 0.638 | 0.193 | 437    |
| 100 | FGES      | 500 | All | 1     | 0.882 | 0.357 | 0.753 | 0.241 | 408    |
| 100 | FGES      | 500 | All | 1.5   | 0.877 | 0.361 | 0.749 | 0.246 | 407.35 |
| 100 | FGES      | 500 | All | 2     | 0.868 | 0.362 | 0.746 | 0.245 | 408.9  |
| 100 | FGES      | 500 | All | 3     | 0.859 | 0.365 | 0.738 | 0.254 | 408.85 |
| 100 | FGES      | 500 | All | 4     | 0.85  | 0.367 | 0.727 | 0.258 | 410.2  |
| 100 | FGES      | 500 | All | 5     | 0.844 | 0.369 | 0.711 | 0.265 | 410.95 |
| 100 | MGM-PCMax | 100 | All | 1e-04 | 0.94  | 0.074 | 0.282 | 0.01  | 581.7  |
| 100 | MGM-PCMax | 100 | All | 0.001 | 0.903 | 0.089 | 0.306 | 0.015 | 580.85 |
| 100 | MGM-PCMax | 100 | All | 0.01  | 0.881 | 0.101 | 0.326 | 0.022 | 580.1  |
| 100 | MGM-PCMax | 100 | All | 0.03  | 0.875 | 0.105 | 0.312 | 0.023 | 580.65 |
| 100 | MGM-PCMax | 100 | All | 0.05  | 0.868 | 0.107 | 0.313 | 0.025 | 580.9  |
| 100 | MGM-PCMax | 100 | All | 0.08  | 0.868 | 0.109 | 0.321 | 0.026 | 580.45 |
| 100 | MGM-PCMax | 300 | All | 1e-04 | 0.985 | 0.155 | 0.318 | 0.032 | 480.5  |
| 100 | MGM-PCMax | 300 | All | 0.001 | 0.979 | 0.166 | 0.325 | 0.038 | 478.9  |
| 100 | MGM-PCMax | 300 | All | 0.01  | 0.971 | 0.173 | 0.336 | 0.042 | 478.35 |
| 100 | MGM-PCMax | 300 | All | 0.03  | 0.966 | 0.175 | 0.342 | 0.044 | 478    |
| 100 | MGM-PCMax | 300 | All | 0.05  | 0.962 | 0.176 | 0.339 | 0.044 | 478.3  |
| 100 | MGM-PCMax | 300 | All | 0.08  | 0.962 | 0.176 | 0.338 | 0.044 | 478.35 |
| 100 | MGM-PCMax | 500 | All | 1e-04 | 0.984 | 0.187 | 0.347 | 0.047 | 487.75 |
| 100 | MGM-PCMax | 500 | All | 0.001 | 0.981 | 0.192 | 0.355 | 0.05  | 486.7  |
| 100 | MGM-PCMax | 500 | All | 0.01  | 0.978 | 0.194 | 0.356 | 0.051 | 486.5  |
| 100 | MGM-PCMax | 500 | All | 0.03  | 0.974 | 0.196 | 0.356 | 0.052 | 486.65 |
| 100 | MGM-PCMax | 500 | All | 0.05  | 0.971 | 0.196 | 0.356 | 0.053 | 486.85 |
| 100 | MGM-PCMax | 500 | All | 0.08  | 0.968 | 0.197 | 0.355 | 0.053 | 487.1  |
| 100 | Copula-PC | 300 | CC  | 1e-04 | 0.879 | 0.187 | 0.972 | 0.037 | 108.3  |
| 100 | Copula-PC | 300 | CC  | 0.001 | 0.794 | 0.217 | 0.979 | 0.051 | 108.45 |
| 100 | Copula-PC | 300 | CC  | 0.01  | 0.611 | 0.258 | 0.874 | 0.068 | 115.7  |
| 100 | Copula-PC | 300 | CC  | 0.03  | 0.508 | 0.291 | 0.779 | 0.079 | 127.7  |
| 100 | Copula-PC | 300 | CC  | 0.05  | 0.446 | 0.311 | 0.566 | 0.094 | 138.05 |
| 100 | Copula-PC | 300 | CC  | 0.08  | 0.387 | 0.337 | 0.485 | 0.111 | 154.9  |
| 100 | Copula-PC | 500 | CC  | 1e-04 | 0.922 | 0.304 | 0.882 | 0.097 | 107.3  |
| 100 | Copula-PC | 500 | CC  | 0.001 | 0.878 | 0.337 | 0.899 | 0.119 | 106.65 |
| 100 | Copula-PC | 500 | CC  | 0.01  | 0.726 | 0.384 | 0.755 | 0.134 | 115    |
| 100 | Copula-PC | 500 | CC  | 0.03  | 0.614 | 0.41  | 0.675 | 0.157 | 127.7  |

EVALUATION OF CAUSAL STRUCTURE LEARNING

|     |               |     |    |       |       |       |       |       |        |
|-----|---------------|-----|----|-------|-------|-------|-------|-------|--------|
| 100 | Copula-PC     | 500 | CC | 0.05  | 0.56  | 0.427 | 0.598 | 0.166 | 138.2  |
| 100 | Copula-PC     | 500 | CC | 0.08  | 0.489 | 0.444 | 0.53  | 0.19  | 153.9  |
| 100 | MGM-CPCStable | 100 | CC | 1e-04 | 0.953 | 0.1   | 1     | 0.009 | 141.25 |
| 100 | MGM-CPCStable | 100 | CC | 0.001 | 0.937 | 0.128 | 1     | 0.015 | 139.45 |
| 100 | MGM-CPCStable | 100 | CC | 0.01  | 0.924 | 0.146 | 0.972 | 0.018 | 138.45 |
| 100 | MGM-CPCStable | 100 | CC | 0.03  | 0.899 | 0.149 | 0.904 | 0.021 | 138.65 |
| 100 | MGM-CPCStable | 100 | CC | 0.05  | 0.885 | 0.153 | 0.888 | 0.025 | 138.4  |
| 100 | MGM-CPCStable | 100 | CC | 0.08  | 0.891 | 0.156 | 0.896 | 0.028 | 137.85 |
| 100 | MGM-CPCStable | 300 | CC | 1e-04 | 0.982 | 0.204 | 0.972 | 0.026 | 106.45 |
| 100 | MGM-CPCStable | 300 | CC | 0.001 | 0.972 | 0.225 | 0.99  | 0.039 | 104.95 |
| 100 | MGM-CPCStable | 300 | CC | 0.01  | 0.97  | 0.231 | 0.952 | 0.049 | 104.2  |
| 100 | MGM-CPCStable | 300 | CC | 0.03  | 0.967 | 0.234 | 0.933 | 0.053 | 104.1  |
| 100 | MGM-CPCStable | 300 | CC | 0.05  | 0.962 | 0.235 | 0.904 | 0.057 | 103.9  |
| 100 | MGM-CPCStable | 300 | CC | 0.08  | 0.959 | 0.235 | 0.866 | 0.066 | 103.5  |
| 100 | MGM-CPCStable | 500 | CC | 1e-04 | 0.983 | 0.285 | 0.983 | 0.079 | 107.8  |
| 100 | MGM-CPCStable | 500 | CC | 0.001 | 0.985 | 0.295 | 0.996 | 0.094 | 106.15 |
| 100 | MGM-CPCStable | 500 | CC | 0.01  | 0.983 | 0.299 | 0.988 | 0.1   | 105.6  |
| 100 | MGM-CPCStable | 500 | CC | 0.03  | 0.982 | 0.299 | 0.975 | 0.104 | 105.5  |
| 100 | MGM-CPCStable | 500 | CC | 0.05  | 0.971 | 0.3   | 0.959 | 0.104 | 105.6  |
| 100 | MGM-CPCStable | 500 | CC | 0.08  | 0.969 | 0.301 | 0.947 | 0.108 | 105.55 |
| 100 | MGM-PCStable  | 100 | CC | 1e-04 | 0.953 | 0.1   | 0.346 | 0.027 | 142.75 |
| 100 | MGM-PCStable  | 100 | CC | 0.001 | 0.937 | 0.128 | 0.408 | 0.052 | 141.5  |
| 100 | MGM-PCStable  | 100 | CC | 0.01  | 0.924 | 0.146 | 0.426 | 0.073 | 140.7  |
| 100 | MGM-PCStable  | 100 | CC | 0.03  | 0.899 | 0.149 | 0.416 | 0.079 | 141.05 |
| 100 | MGM-PCStable  | 100 | CC | 0.05  | 0.885 | 0.153 | 0.409 | 0.082 | 141.2  |
| 100 | MGM-PCStable  | 100 | CC | 0.08  | 0.891 | 0.156 | 0.409 | 0.084 | 141    |
| 100 | MGM-PCStable  | 300 | CC | 1e-04 | 0.982 | 0.204 | 0.473 | 0.115 | 107.7  |
| 100 | MGM-PCStable  | 300 | CC | 0.001 | 0.972 | 0.225 | 0.435 | 0.133 | 107.35 |
| 100 | MGM-PCStable  | 300 | CC | 0.01  | 0.97  | 0.231 | 0.428 | 0.137 | 107.45 |
| 100 | MGM-PCStable  | 300 | CC | 0.03  | 0.967 | 0.234 | 0.423 | 0.14  | 107.5  |
| 100 | MGM-PCStable  | 300 | CC | 0.05  | 0.962 | 0.235 | 0.419 | 0.14  | 107.65 |
| 100 | MGM-PCStable  | 300 | CC | 0.08  | 0.959 | 0.235 | 0.414 | 0.14  | 107.75 |
| 100 | MGM-PCStable  | 500 | CC | 1e-04 | 0.983 | 0.285 | 0.489 | 0.181 | 112.4  |
| 100 | MGM-PCStable  | 500 | CC | 0.001 | 0.985 | 0.295 | 0.491 | 0.191 | 111.8  |
| 100 | MGM-PCStable  | 500 | CC | 0.01  | 0.983 | 0.299 | 0.487 | 0.195 | 111.7  |
| 100 | MGM-PCStable  | 500 | CC | 0.03  | 0.982 | 0.299 | 0.486 | 0.195 | 111.8  |
| 100 | MGM-PCStable  | 500 | CC | 0.05  | 0.971 | 0.3   | 0.479 | 0.196 | 111.95 |
| 100 | MGM-PCStable  | 500 | CC | 0.08  | 0.969 | 0.301 | 0.477 | 0.196 | 112.15 |
| 100 | FGES          | 100 | CC | 1     | 0.742 | 0.218 | 0.583 | 0.118 | 137.85 |
| 100 | FGES          | 100 | CC | 1.5   | 0.734 | 0.22  | 0.584 | 0.121 | 137.9  |
| 100 | FGES          | 100 | CC | 2     | 0.701 | 0.22  | 0.561 | 0.12  | 139.85 |
| 100 | FGES          | 100 | CC | 3     | 0.692 | 0.226 | 0.555 | 0.126 | 140.1  |
| 100 | FGES          | 100 | CC | 4     | 0.685 | 0.227 | 0.54  | 0.128 | 140.9  |
| 100 | FGES          | 100 | CC | 5     | 0.671 | 0.231 | 0.542 | 0.138 | 141.3  |
| 100 | FGES          | 300 | CC | 1     | 0.877 | 0.355 | 0.755 | 0.225 | 93.15  |

|     |               |     |    |       |       |       |       |       |        |
|-----|---------------|-----|----|-------|-------|-------|-------|-------|--------|
| 100 | FGES          | 300 | CC | 1.5   | 0.866 | 0.357 | 0.727 | 0.237 | 93.2   |
| 100 | FGES          | 300 | CC | 2     | 0.853 | 0.363 | 0.724 | 0.247 | 93.3   |
| 100 | FGES          | 300 | CC | 3     | 0.847 | 0.366 | 0.716 | 0.25  | 93.5   |
| 100 | FGES          | 300 | CC | 4     | 0.838 | 0.371 | 0.699 | 0.25  | 93.9   |
| 100 | FGES          | 300 | CC | 5     | 0.821 | 0.372 | 0.685 | 0.258 | 94.65  |
| 100 | FGES          | 500 | CC | 1     | 0.898 | 0.441 | 0.773 | 0.321 | 90.5   |
| 100 | FGES          | 500 | CC | 1.5   | 0.891 | 0.448 | 0.774 | 0.332 | 89.85  |
| 100 | FGES          | 500 | CC | 2     | 0.88  | 0.448 | 0.769 | 0.336 | 90.55  |
| 100 | FGES          | 500 | CC | 3     | 0.865 | 0.451 | 0.76  | 0.342 | 91.1   |
| 100 | FGES          | 500 | CC | 4     | 0.852 | 0.453 | 0.743 | 0.345 | 92.15  |
| 100 | FGES          | 500 | CC | 5     | 0.844 | 0.456 | 0.726 | 0.35  | 92.7   |
| 100 | MGM-PCMax     | 100 | CC | 1e-04 | 0.956 | 0.102 | 0.333 | 0.015 | 143.05 |
| 100 | MGM-PCMax     | 100 | CC | 0.001 | 0.923 | 0.129 | 0.335 | 0.027 | 142.05 |
| 100 | MGM-PCMax     | 100 | CC | 0.01  | 0.921 | 0.147 | 0.344 | 0.035 | 141.4  |
| 100 | MGM-PCMax     | 100 | CC | 0.03  | 0.892 | 0.149 | 0.33  | 0.038 | 141.9  |
| 100 | MGM-PCMax     | 100 | CC | 0.05  | 0.885 | 0.153 | 0.345 | 0.042 | 141.65 |
| 100 | MGM-PCMax     | 100 | CC | 0.08  | 0.888 | 0.156 | 0.369 | 0.044 | 141.35 |
| 100 | MGM-PCMax     | 300 | CC | 1e-04 | 0.982 | 0.207 | 0.323 | 0.043 | 110.55 |
| 100 | MGM-PCMax     | 300 | CC | 0.001 | 0.972 | 0.226 | 0.317 | 0.056 | 109.9  |
| 100 | MGM-PCMax     | 300 | CC | 0.01  | 0.97  | 0.231 | 0.332 | 0.061 | 109.45 |
| 100 | MGM-PCMax     | 300 | CC | 0.03  | 0.967 | 0.234 | 0.331 | 0.063 | 109.3  |
| 100 | MGM-PCMax     | 300 | CC | 0.05  | 0.962 | 0.235 | 0.335 | 0.065 | 109.35 |
| 100 | MGM-PCMax     | 300 | CC | 0.08  | 0.963 | 0.235 | 0.338 | 0.065 | 109.25 |
| 100 | MGM-PCMax     | 500 | CC | 1e-04 | 0.983 | 0.285 | 0.272 | 0.067 | 117.25 |
| 100 | MGM-PCMax     | 500 | CC | 0.001 | 0.979 | 0.295 | 0.283 | 0.073 | 116.65 |
| 100 | MGM-PCMax     | 500 | CC | 0.01  | 0.977 | 0.299 | 0.286 | 0.075 | 116.75 |
| 100 | MGM-PCMax     | 500 | CC | 0.03  | 0.975 | 0.299 | 0.289 | 0.075 | 116.7  |
| 100 | MGM-PCMax     | 500 | CC | 0.05  | 0.971 | 0.3   | 0.288 | 0.076 | 116.75 |
| 100 | MGM-PCMax     | 500 | CC | 0.08  | 0.969 | 0.301 | 0.287 | 0.077 | 116.8  |
| 100 | Copula-PC     | 300 | CD | 1e-04 | 0.894 | 0.102 | 0.984 | 0.021 | 252.4  |
| 100 | Copula-PC     | 300 | CD | 0.001 | 0.796 | 0.122 | 0.987 | 0.026 | 253.65 |
| 100 | Copula-PC     | 300 | CD | 0.01  | 0.547 | 0.155 | 0.775 | 0.031 | 272.8  |
| 100 | Copula-PC     | 300 | CD | 0.03  | 0.393 | 0.176 | 0.508 | 0.039 | 306.3  |
| 100 | Copula-PC     | 300 | CD | 0.05  | 0.332 | 0.19  | 0.437 | 0.043 | 332.95 |
| 100 | Copula-PC     | 300 | CD | 0.08  | 0.279 | 0.207 | 0.359 | 0.051 | 371.3  |
| 100 | Copula-PC     | 500 | CD | 1e-04 | 0.769 | 0.118 | 0.912 | 0.022 | 251.05 |
| 100 | Copula-PC     | 500 | CD | 0.001 | 0.629 | 0.132 | 0.742 | 0.029 | 258.7  |
| 100 | Copula-PC     | 500 | CD | 0.01  | 0.396 | 0.163 | 0.448 | 0.042 | 293.9  |
| 100 | Copula-PC     | 500 | CD | 0.03  | 0.291 | 0.184 | 0.296 | 0.053 | 339.15 |
| 100 | Copula-PC     | 500 | CD | 0.05  | 0.251 | 0.2   | 0.232 | 0.06  | 374    |
| 100 | Copula-PC     | 500 | CD | 0.08  | 0.223 | 0.218 | 0.209 | 0.071 | 412.4  |
| 100 | MGM-CPCStable | 100 | CD | 1e-04 | 0.926 | 0.065 | 1     | 0.006 | 294    |
| 100 | MGM-CPCStable | 100 | CD | 0.001 | 0.891 | 0.077 | 0.914 | 0.009 | 292.9  |
| 100 | MGM-CPCStable | 100 | CD | 0.01  | 0.856 | 0.089 | 0.892 | 0.013 | 292    |
| 100 | MGM-CPCStable | 100 | CD | 0.03  | 0.851 | 0.094 | 0.931 | 0.017 | 291.25 |

EVALUATION OF CAUSAL STRUCTURE LEARNING

|     |               |     |    |       |       |       |       |       |        |
|-----|---------------|-----|----|-------|-------|-------|-------|-------|--------|
| 100 | MGM-CPCStable | 100 | CD | 0.05  | 0.843 | 0.096 | 0.897 | 0.019 | 291.15 |
| 100 | MGM-CPCStable | 100 | CD | 0.08  | 0.844 | 0.098 | 0.846 | 0.019 | 290.95 |
| 100 | MGM-CPCStable | 300 | CD | 1e-04 | 0.992 | 0.129 | 0.993 | 0.016 | 247.55 |
| 100 | MGM-CPCStable | 300 | CD | 0.001 | 0.987 | 0.136 | 0.996 | 0.021 | 246.25 |
| 100 | MGM-CPCStable | 300 | CD | 0.01  | 0.968 | 0.142 | 0.909 | 0.025 | 245.5  |
| 100 | MGM-CPCStable | 300 | CD | 0.03  | 0.962 | 0.144 | 0.846 | 0.025 | 245.7  |
| 100 | MGM-CPCStable | 300 | CD | 0.05  | 0.963 | 0.145 | 0.874 | 0.026 | 245.45 |
| 100 | MGM-CPCStable | 300 | CD | 0.08  | 0.963 | 0.145 | 0.896 | 0.027 | 245.3  |
| 100 | MGM-CPCStable | 500 | CD | 1e-04 | 0.987 | 0.117 | 0.956 | 0.019 | 244.3  |
| 100 | MGM-CPCStable | 500 | CD | 0.001 | 0.981 | 0.121 | 0.983 | 0.021 | 243.5  |
| 100 | MGM-CPCStable | 500 | CD | 0.01  | 0.978 | 0.123 | 0.948 | 0.024 | 243.25 |
| 100 | MGM-CPCStable | 500 | CD | 0.03  | 0.969 | 0.125 | 0.876 | 0.027 | 243.1  |
| 100 | MGM-CPCStable | 500 | CD | 0.05  | 0.969 | 0.125 | 0.871 | 0.028 | 243.05 |
| 100 | MGM-CPCStable | 500 | CD | 0.08  | 0.967 | 0.125 | 0.917 | 0.031 | 242.85 |
| 100 | MGM-PCStable  | 100 | CD | 1e-04 | 0.926 | 0.065 | 0.458 | 0.02  | 295    |
| 100 | MGM-PCStable  | 100 | CD | 0.001 | 0.891 | 0.077 | 0.422 | 0.03  | 294.9  |
| 100 | MGM-PCStable  | 100 | CD | 0.01  | 0.856 | 0.089 | 0.409 | 0.041 | 294.9  |
| 100 | MGM-PCStable  | 100 | CD | 0.03  | 0.851 | 0.094 | 0.405 | 0.047 | 294.85 |
| 100 | MGM-PCStable  | 100 | CD | 0.05  | 0.843 | 0.096 | 0.388 | 0.047 | 295.5  |
| 100 | MGM-PCStable  | 100 | CD | 0.08  | 0.844 | 0.098 | 0.383 | 0.048 | 295.5  |
| 100 | MGM-PCStable  | 300 | CD | 1e-04 | 0.992 | 0.129 | 0.382 | 0.057 | 252    |
| 100 | MGM-PCStable  | 300 | CD | 0.001 | 0.987 | 0.136 | 0.411 | 0.065 | 251.5  |
| 100 | MGM-PCStable  | 300 | CD | 0.01  | 0.968 | 0.142 | 0.4   | 0.068 | 251.9  |
| 100 | MGM-PCStable  | 300 | CD | 0.03  | 0.962 | 0.144 | 0.4   | 0.07  | 252.05 |
| 100 | MGM-PCStable  | 300 | CD | 0.05  | 0.963 | 0.145 | 0.399 | 0.07  | 252.1  |
| 100 | MGM-PCStable  | 300 | CD | 0.08  | 0.963 | 0.145 | 0.398 | 0.07  | 252.1  |
| 100 | MGM-PCStable  | 500 | CD | 1e-04 | 0.987 | 0.117 | 0.407 | 0.062 | 248.75 |
| 100 | MGM-PCStable  | 500 | CD | 0.001 | 0.981 | 0.121 | 0.401 | 0.067 | 248.45 |
| 100 | MGM-PCStable  | 500 | CD | 0.01  | 0.978 | 0.123 | 0.403 | 0.069 | 248.45 |
| 100 | MGM-PCStable  | 500 | CD | 0.03  | 0.969 | 0.125 | 0.399 | 0.07  | 248.6  |
| 100 | MGM-PCStable  | 500 | CD | 0.05  | 0.969 | 0.125 | 0.399 | 0.07  | 248.6  |
| 100 | MGM-PCStable  | 500 | CD | 0.08  | 0.967 | 0.125 | 0.401 | 0.072 | 248.75 |
| 100 | FGES          | 100 | CD | 1     | 0.633 | 0.142 | 0.562 | 0.082 | 297.05 |
| 100 | FGES          | 100 | CD | 1.5   | 0.61  | 0.145 | 0.528 | 0.085 | 299.2  |
| 100 | FGES          | 100 | CD | 2     | 0.599 | 0.147 | 0.496 | 0.087 | 300.65 |
| 100 | FGES          | 100 | CD | 3     | 0.578 | 0.152 | 0.477 | 0.093 | 303.1  |
| 100 | FGES          | 100 | CD | 4     | 0.56  | 0.155 | 0.462 | 0.097 | 305.5  |
| 100 | FGES          | 100 | CD | 5     | 0.553 | 0.159 | 0.445 | 0.102 | 306.5  |
| 100 | FGES          | 300 | CD | 1     | 0.802 | 0.254 | 0.638 | 0.135 | 235.6  |
| 100 | FGES          | 300 | CD | 1.5   | 0.783 | 0.257 | 0.61  | 0.147 | 236.4  |
| 100 | FGES          | 300 | CD | 2     | 0.781 | 0.259 | 0.606 | 0.155 | 235.95 |
| 100 | FGES          | 300 | CD | 3     | 0.772 | 0.265 | 0.605 | 0.16  | 235.8  |
| 100 | FGES          | 300 | CD | 4     | 0.764 | 0.269 | 0.592 | 0.163 | 236.7  |
| 100 | FGES          | 300 | CD | 5     | 0.753 | 0.272 | 0.577 | 0.168 | 237.6  |
| 100 | FGES          | 500 | CD | 1     | 0.839 | 0.317 | 0.719 | 0.21  | 215.05 |

|     |               |     |    |       |       |       |       |       |        |
|-----|---------------|-----|----|-------|-------|-------|-------|-------|--------|
| 100 | FGES          | 500 | CD | 1.5   | 0.833 | 0.319 | 0.709 | 0.211 | 215.65 |
| 100 | FGES          | 500 | CD | 2     | 0.822 | 0.32  | 0.699 | 0.209 | 216.8  |
| 100 | FGES          | 500 | CD | 3     | 0.816 | 0.325 | 0.695 | 0.219 | 216.2  |
| 100 | FGES          | 500 | CD | 4     | 0.808 | 0.327 | 0.687 | 0.225 | 216.45 |
| 100 | FGES          | 500 | CD | 5     | 0.799 | 0.328 | 0.67  | 0.231 | 217    |
| 100 | MGM-PCMax     | 100 | CD | 1e-04 | 0.928 | 0.067 | 0.253 | 0.009 | 296.25 |
| 100 | MGM-PCMax     | 100 | CD | 0.001 | 0.886 | 0.079 | 0.236 | 0.013 | 296.35 |
| 100 | MGM-PCMax     | 100 | CD | 0.01  | 0.851 | 0.09  | 0.33  | 0.021 | 295.9  |
| 100 | MGM-PCMax     | 100 | CD | 0.03  | 0.855 | 0.094 | 0.323 | 0.022 | 295.95 |
| 100 | MGM-PCMax     | 100 | CD | 0.05  | 0.843 | 0.096 | 0.318 | 0.023 | 296.1  |
| 100 | MGM-PCMax     | 100 | CD | 0.08  | 0.842 | 0.098 | 0.327 | 0.025 | 295.9  |
| 100 | MGM-PCMax     | 300 | CD | 1e-04 | 0.994 | 0.129 | 0.284 | 0.023 | 253.4  |
| 100 | MGM-PCMax     | 300 | CD | 0.001 | 0.989 | 0.136 | 0.316 | 0.03  | 252.7  |
| 100 | MGM-PCMax     | 300 | CD | 0.01  | 0.968 | 0.142 | 0.315 | 0.031 | 253.15 |
| 100 | MGM-PCMax     | 300 | CD | 0.03  | 0.965 | 0.144 | 0.332 | 0.033 | 252.75 |
| 100 | MGM-PCMax     | 300 | CD | 0.05  | 0.96  | 0.145 | 0.329 | 0.034 | 252.95 |
| 100 | MGM-PCMax     | 300 | CD | 0.08  | 0.961 | 0.145 | 0.328 | 0.034 | 252.95 |
| 100 | MGM-PCMax     | 500 | CD | 1e-04 | 0.987 | 0.117 | 0.32  | 0.029 | 249.7  |
| 100 | MGM-PCMax     | 500 | CD | 0.001 | 0.979 | 0.121 | 0.319 | 0.032 | 249.5  |
| 100 | MGM-PCMax     | 500 | CD | 0.01  | 0.978 | 0.123 | 0.316 | 0.032 | 249.45 |
| 100 | MGM-PCMax     | 500 | CD | 0.03  | 0.969 | 0.125 | 0.322 | 0.034 | 249.45 |
| 100 | MGM-PCMax     | 500 | CD | 0.05  | 0.969 | 0.125 | 0.323 | 0.035 | 249.4  |
| 100 | MGM-PCMax     | 500 | CD | 0.08  | 0.968 | 0.125 | 0.32  | 0.034 | 249.6  |
| 100 | Copula-PC     | 300 | DD | 1e-04 | 0.933 | 0.129 | 1     | 0.021 | 116.1  |
| 100 | Copula-PC     | 300 | DD | 0.001 | 0.842 | 0.154 | 1     | 0.025 | 116.95 |
| 100 | Copula-PC     | 300 | DD | 0.01  | 0.625 | 0.191 | 0.775 | 0.032 | 125.15 |
| 100 | Copula-PC     | 300 | DD | 0.03  | 0.45  | 0.218 | 0.487 | 0.041 | 142.6  |
| 100 | Copula-PC     | 300 | DD | 0.05  | 0.381 | 0.235 | 0.453 | 0.055 | 155.6  |
| 100 | Copula-PC     | 300 | DD | 0.08  | 0.327 | 0.251 | 0.401 | 0.063 | 171.75 |
| 100 | Copula-PC     | 500 | DD | 1e-04 | 0.745 | 0.22  | 0.631 | 0.024 | 127.15 |
| 100 | Copula-PC     | 500 | DD | 0.001 | 0.633 | 0.246 | 0.504 | 0.033 | 134.85 |
| 100 | Copula-PC     | 500 | DD | 0.01  | 0.452 | 0.286 | 0.345 | 0.059 | 160.1  |
| 100 | Copula-PC     | 500 | DD | 0.03  | 0.353 | 0.31  | 0.298 | 0.081 | 187.05 |
| 100 | Copula-PC     | 500 | DD | 0.05  | 0.308 | 0.324 | 0.281 | 0.097 | 206.85 |
| 100 | Copula-PC     | 500 | DD | 0.08  | 0.266 | 0.338 | 0.233 | 0.114 | 231.3  |
| 100 | MGM-CPCStable | 100 | DD | 1e-04 | 0.932 | 0.062 | 1     | 0.005 | 141.2  |
| 100 | MGM-CPCStable | 100 | DD | 0.001 | 0.895 | 0.074 | 1     | 0.008 | 140.75 |
| 100 | MGM-CPCStable | 100 | DD | 0.01  | 0.855 | 0.081 | 1     | 0.014 | 140.4  |
| 100 | MGM-CPCStable | 100 | DD | 0.03  | 0.867 | 0.085 | 0.923 | 0.019 | 139.8  |
| 100 | MGM-CPCStable | 100 | DD | 0.05  | 0.854 | 0.086 | 0.962 | 0.018 | 139.95 |
| 100 | MGM-CPCStable | 100 | DD | 0.08  | 0.849 | 0.088 | 0.967 | 0.019 | 139.85 |
| 100 | MGM-CPCStable | 300 | DD | 1e-04 | 0.987 | 0.162 | 0.958 | 0.016 | 113.9  |
| 100 | MGM-CPCStable | 300 | DD | 0.001 | 0.989 | 0.175 | 0.964 | 0.02  | 112.9  |
| 100 | MGM-CPCStable | 300 | DD | 0.01  | 0.986 | 0.185 | 0.886 | 0.027 | 112    |
| 100 | MGM-CPCStable | 300 | DD | 0.03  | 0.975 | 0.186 | 0.875 | 0.033 | 111.85 |

EVALUATION OF CAUSAL STRUCTURE LEARNING

|     |               |     |    |       |       |       |       |       |        |
|-----|---------------|-----|----|-------|-------|-------|-------|-------|--------|
| 100 | MGM-CPCStable | 300 | DD | 0.05  | 0.972 | 0.187 | 0.896 | 0.033 | 111.9  |
| 100 | MGM-CPCStable | 300 | DD | 0.08  | 0.968 | 0.187 | 0.944 | 0.038 | 111.6  |
| 100 | MGM-CPCStable | 500 | DD | 1e-04 | 0.987 | 0.227 | 0.864 | 0.016 | 117.7  |
| 100 | MGM-CPCStable | 500 | DD | 0.001 | 0.987 | 0.227 | 0.885 | 0.02  | 117.35 |
| 100 | MGM-CPCStable | 500 | DD | 0.01  | 0.98  | 0.231 | 0.931 | 0.026 | 116.95 |
| 100 | MGM-CPCStable | 500 | DD | 0.03  | 0.976 | 0.233 | 0.881 | 0.033 | 116.6  |
| 100 | MGM-CPCStable | 500 | DD | 0.05  | 0.973 | 0.233 | 0.897 | 0.036 | 116.55 |
| 100 | MGM-CPCStable | 500 | DD | 0.08  | 0.97  | 0.233 | 0.872 | 0.038 | 116.6  |
| 100 | MGM-PCStable  | 100 | DD | 1e-04 | 0.932 | 0.062 | 0.527 | 0.016 | 141.6  |
| 100 | MGM-PCStable  | 100 | DD | 0.001 | 0.895 | 0.074 | 0.406 | 0.024 | 141.35 |
| 100 | MGM-PCStable  | 100 | DD | 0.01  | 0.855 | 0.081 | 0.419 | 0.031 | 141.45 |
| 100 | MGM-PCStable  | 100 | DD | 0.03  | 0.867 | 0.085 | 0.408 | 0.034 | 141.35 |
| 100 | MGM-PCStable  | 100 | DD | 0.05  | 0.854 | 0.086 | 0.403 | 0.034 | 141.65 |
| 100 | MGM-PCStable  | 100 | DD | 0.08  | 0.849 | 0.088 | 0.399 | 0.035 | 141.7  |
| 100 | MGM-PCStable  | 300 | DD | 1e-04 | 0.987 | 0.162 | 0.494 | 0.081 | 115.25 |
| 100 | MGM-PCStable  | 300 | DD | 0.001 | 0.989 | 0.175 | 0.468 | 0.089 | 115    |
| 100 | MGM-PCStable  | 300 | DD | 0.01  | 0.986 | 0.185 | 0.455 | 0.097 | 114.7  |
| 100 | MGM-PCStable  | 300 | DD | 0.03  | 0.975 | 0.186 | 0.436 | 0.097 | 115.1  |
| 100 | MGM-PCStable  | 300 | DD | 0.05  | 0.972 | 0.187 | 0.435 | 0.098 | 115.15 |
| 100 | MGM-PCStable  | 300 | DD | 0.08  | 0.968 | 0.187 | 0.436 | 0.1   | 115.15 |
| 100 | MGM-PCStable  | 500 | DD | 1e-04 | 0.987 | 0.227 | 0.466 | 0.12  | 119.5  |
| 100 | MGM-PCStable  | 500 | DD | 0.001 | 0.987 | 0.227 | 0.463 | 0.12  | 119.6  |
| 100 | MGM-PCStable  | 500 | DD | 0.01  | 0.98  | 0.231 | 0.461 | 0.122 | 119.75 |
| 100 | MGM-PCStable  | 500 | DD | 0.03  | 0.976 | 0.233 | 0.461 | 0.124 | 119.7  |
| 100 | MGM-PCStable  | 500 | DD | 0.05  | 0.973 | 0.233 | 0.46  | 0.124 | 119.8  |
| 100 | MGM-PCStable  | 500 | DD | 0.08  | 0.97  | 0.233 | 0.459 | 0.124 | 119.9  |
| 100 | FGES          | 100 | DD | 1     | 0.643 | 0.122 | 0.622 | 0.069 | 143.05 |
| 100 | FGES          | 100 | DD | 1.5   | 0.621 | 0.123 | 0.577 | 0.071 | 144.1  |
| 100 | FGES          | 100 | DD | 2     | 0.603 | 0.124 | 0.548 | 0.075 | 145    |
| 100 | FGES          | 100 | DD | 3     | 0.567 | 0.128 | 0.502 | 0.077 | 147.2  |
| 100 | FGES          | 100 | DD | 4     | 0.555 | 0.13  | 0.475 | 0.08  | 148.2  |
| 100 | FGES          | 100 | DD | 5     | 0.552 | 0.132 | 0.46  | 0.08  | 148.7  |
| 100 | FGES          | 300 | DD | 1     | 0.886 | 0.277 | 0.74  | 0.152 | 105.05 |
| 100 | FGES          | 300 | DD | 1.5   | 0.881 | 0.282 | 0.729 | 0.162 | 104.75 |
| 100 | FGES          | 300 | DD | 2     | 0.87  | 0.287 | 0.738 | 0.173 | 104.7  |
| 100 | FGES          | 300 | DD | 3     | 0.864 | 0.295 | 0.718 | 0.178 | 105    |
| 100 | FGES          | 300 | DD | 4     | 0.86  | 0.297 | 0.715 | 0.182 | 105.05 |
| 100 | FGES          | 300 | DD | 5     | 0.861 | 0.3   | 0.714 | 0.187 | 104.75 |
| 100 | FGES          | 500 | DD | 1     | 0.928 | 0.352 | 0.764 | 0.222 | 102.45 |
| 100 | FGES          | 500 | DD | 1.5   | 0.927 | 0.356 | 0.772 | 0.228 | 101.85 |
| 100 | FGES          | 500 | DD | 2     | 0.927 | 0.358 | 0.779 | 0.225 | 101.55 |
| 100 | FGES          | 500 | DD | 3     | 0.924 | 0.36  | 0.775 | 0.233 | 101.55 |
| 100 | FGES          | 500 | DD | 4     | 0.922 | 0.361 | 0.768 | 0.238 | 101.6  |
| 100 | FGES          | 500 | DD | 5     | 0.922 | 0.363 | 0.755 | 0.245 | 101.25 |
| 100 | MGM-PCMax     | 100 | DD | 1e-04 | 0.915 | 0.063 | 0.213 | 0.006 | 142.4  |

|     |           |     |    |       |       |       |       |       |        |
|-----|-----------|-----|----|-------|-------|-------|-------|-------|--------|
| 100 | MGM-PCMax | 100 | DD | 0.001 | 0.88  | 0.074 | 0.269 | 0.009 | 142.45 |
| 100 | MGM-PCMax | 100 | DD | 0.01  | 0.85  | 0.082 | 0.243 | 0.011 | 142.8  |
| 100 | MGM-PCMax | 100 | DD | 0.03  | 0.86  | 0.085 | 0.235 | 0.012 | 142.8  |
| 100 | MGM-PCMax | 100 | DD | 0.05  | 0.854 | 0.086 | 0.21  | 0.011 | 143.15 |
| 100 | MGM-PCMax | 100 | DD | 0.08  | 0.849 | 0.088 | 0.201 | 0.011 | 143.2  |
| 100 | MGM-PCMax | 300 | DD | 1e-04 | 0.987 | 0.163 | 0.361 | 0.038 | 116.55 |
| 100 | MGM-PCMax | 300 | DD | 0.001 | 0.989 | 0.175 | 0.347 | 0.039 | 116.3  |
| 100 | MGM-PCMax | 300 | DD | 0.01  | 0.986 | 0.185 | 0.377 | 0.047 | 115.75 |
| 100 | MGM-PCMax | 300 | DD | 0.03  | 0.975 | 0.186 | 0.374 | 0.048 | 115.95 |
| 100 | MGM-PCMax | 300 | DD | 0.05  | 0.972 | 0.187 | 0.374 | 0.049 | 116    |
| 100 | MGM-PCMax | 300 | DD | 0.08  | 0.968 | 0.187 | 0.369 | 0.048 | 116.15 |
| 100 | MGM-PCMax | 500 | DD | 1e-04 | 0.984 | 0.227 | 0.377 | 0.06  | 120.8  |
| 100 | MGM-PCMax | 500 | DD | 0.001 | 0.984 | 0.227 | 0.388 | 0.062 | 120.55 |
| 100 | MGM-PCMax | 500 | DD | 0.01  | 0.98  | 0.231 | 0.399 | 0.064 | 120.3  |
| 100 | MGM-PCMax | 500 | DD | 0.03  | 0.976 | 0.233 | 0.386 | 0.065 | 120.5  |
| 100 | MGM-PCMax | 500 | DD | 0.05  | 0.97  | 0.233 | 0.383 | 0.065 | 120.7  |
| 100 | MGM-PCMax | 500 | DD | 0.08  | 0.968 | 0.233 | 0.386 | 0.066 | 120.7  |
